# Supplementary material for: Investigating the native functions of [NiFe]-CODH through genomic context analysis
Source: eLife. 2026 Apr 7;15:RP108780. doi: 10.7554/eLife.108780 (PMC13056359; doi:10.7554/eLife.108780)
Supplement: Supplementary file 1. [file elife-108780-supp1.xlsx]

## Sheet: Complete_Dataset
Protein_ID	Product	Assembly	Seed_Protein	Phylogenetic_Clade	Is_Neighbour	COG_Category	eggNOG_OGs	COG_Description	Manual_Description	KEGG_Pathway	EC_Number	Sequence_ID	Start_Position	End_Position
ABD40438.1	ferredoxin	GCA_000013445.1	ABD40443.1	A	TRUE	C	COG3894@1|root,arCOG02035@2157|Archaea,2XVBE@28890|Euryarchaeota,2NB3A@224756|Methanomicrobia	Domain of unknown function (DUF4445)	Ferredoxin			CP000254.1	791480	793363
ABD40439.1	acetyl-CoA decarbonylase/synthase gamma subunit	GCA_000013445.1	ABD40443.1	A	TRUE	C	COG1456@1|root,arCOG01979@2157|Archaea,2XUSG@28890|Euryarchaeota,2N9BD@224756|Methanomicrobia	Part of a complex that catalyzes the reversible cleavage of acetyl-CoA, allowing	One carbon pool	ko00680,ko00720,ko01120,ko01200,map00680,map00720,map01120,map01200	2.1.1.245	CP000254.1	793399	794829
ABD40439.1	acetyl-CoA decarbonylase/synthase gamma subunit	GCA_000013445.1	ABD40443.1	A	TRUE	C	COG1456@1|root,arCOG01979@2157|Archaea,2XUSG@28890|Euryarchaeota,2N9BD@224756|Methanomicrobia	Part of a complex that catalyzes the reversible cleavage of acetyl-CoA, allowing	One carbon pool	ko00680,ko00720,ko01120,ko01200,map00680,map00720,map01120,map01200	2.1.1.245	CP000254.1	793399	794829
ABD40440.1	acetyl-CoA decarbonylase/synthase delta subunit	GCA_000013445.1	ABD40443.1	A	TRUE	C	COG2069@1|root,arCOG01980@2157|Archaea,2XTXS@28890|Euryarchaeota,2N93F@224756|Methanomicrobia	Part of a complex that catalyzes the reversible cleavage of acetyl-CoA, allowing	One carbon pool	ko00680,ko00720,ko01120,ko01200,map00680,map00720,map01120,map01200	2.1.1.245	CP000254.1	794840	796090
ABD40440.1	acetyl-CoA decarbonylase/synthase delta subunit	GCA_000013445.1	ABD40443.1	A	TRUE	C	COG2069@1|root,arCOG01980@2157|Archaea,2XTXS@28890|Euryarchaeota,2N93F@224756|Methanomicrobia	Part of a complex that catalyzes the reversible cleavage of acetyl-CoA, allowing	One carbon pool	ko00680,ko00720,ko01120,ko01200,map00680,map00720,map01120,map01200	2.1.1.245	CP000254.1	794840	796090
ABD40441.1	acetyl-CoA decarbonylase/synthase beta subunit	GCA_000013445.1	ABD40443.1	A	TRUE	C	COG1614@1|root,arCOG04360@2157|Archaea,2XU0D@28890|Euryarchaeota,2N95I@224756|Methanomicrobia	Part of a complex that catalyzes the reversible cleavage of acetyl-CoA, allowing growth on acetate as sole source of carbon and energy. The alpha-epsilon complex generates CO from CO(2), while the beta subunit (this protein) combines the CO with CoA and a methyl group to form acetyl-CoA. The methyl group, which is incorporated into acetyl-CoA, is transferred to the beta subunit by a corrinoid iro…	One carbon pool	ko00680,ko01120,ko01200,map00680,map01120,map01200		CP000254.1	796083	797486
ABD40441.1	acetyl-CoA decarbonylase/synthase beta subunit	GCA_000013445.1	ABD40443.1	A	TRUE	C	COG1614@1|root,arCOG04360@2157|Archaea,2XU0D@28890|Euryarchaeota,2N95I@224756|Methanomicrobia	Part of a complex that catalyzes the reversible cleavage of acetyl-CoA, allowing growth on acetate as sole source of carbon and energy. The alpha-epsilon complex generates CO from CO(2), while the beta subunit (this protein) combines the CO with CoA and a methyl group to form acetyl-CoA. The methyl group, which is incorporated into acetyl-CoA, is transferred to the beta subunit by a corrinoid iro…	One carbon pool	ko00680,ko01120,ko01200,map00680,map01120,map01200		CP000254.1	796083	797486
ABD40442.1	acetyl-CoA decarbonylase/synthase epsilon subunit	GCA_000013445.1	ABD40443.1	A	TRUE	C	COG1880@1|root,arCOG04408@2157|Archaea,2XWPE@28890|Euryarchaeota	Part of a complex that catalyzes the reversible cleavage of acetyl-CoA, allowing autotrophic growth from CO(2). The alpha- epsilon subcomponent functions as a carbon monoxide dehydrogenase. The precise role of the epsilon subunit is unclear	One carbon pool	ko00680,ko01120,ko01200,map00680,map01120,map01200		CP000254.1	797479	798054
ABD40442.1	acetyl-CoA decarbonylase/synthase epsilon subunit	GCA_000013445.1	ABD40443.1	A	TRUE	C	COG1880@1|root,arCOG04408@2157|Archaea,2XWPE@28890|Euryarchaeota	Part of a complex that catalyzes the reversible cleavage of acetyl-CoA, allowing autotrophic growth from CO(2). The alpha- epsilon subcomponent functions as a carbon monoxide dehydrogenase. The precise role of the epsilon subunit is unclear	One carbon pool	ko00680,ko01120,ko01200,map00680,map01120,map01200		CP000254.1	797479	798054
ABD40443.1	acetyl-CoA decarbonylase/synthase alpha subunit	GCA_000013445.1	ABD40443.1	A	FALSE	unknown		unknown	CODH			CP000254.1	798051	800414
ABD40444.1	CODH nickel-insertion accessory protein	GCA_000013445.1	ABD40443.1	A	TRUE	D	COG3640@1|root,arCOG00587@2157|Archaea	PFAM Cobyrinic acid a,c-diamide synthase	CooC			CP000254.1	800485	801267
ABD40445.1	Cobyrinic acid a%2Cc-diamide synthase	GCA_000013445.1	ABD40443.1	A	TRUE	D	COG3640@1|root,arCOG00587@2157|Archaea,2XW7J@28890|Euryarchaeota,2N9VV@224756|Methanomicrobia	PFAM Cobyrinic acid a,c-diamide synthase	CooC			CP000254.1	801264	802043
ADP77322.1	acetyl-CoA decarbonylase/synthase gamma subunit	GCA_000166095.1	ADP77327.1	A	TRUE	H	COG1456@1|root,arCOG01979@2157|Archaea,2XUSG@28890|Euryarchaeota	Part of a complex that catalyzes the reversible cleavage of acetyl-CoA, allowing autotrophic growth from CO(2)	One carbon pool	ko00680,ko00720,ko01120,ko01200,map00680,map00720,map01120,map01200	2.1.1.245	CP002278.1	498952	500319
ADP77322.1	acetyl-CoA decarbonylase/synthase gamma subunit	GCA_000166095.1	ADP77327.1	A	TRUE	H	COG1456@1|root,arCOG01979@2157|Archaea,2XUSG@28890|Euryarchaeota	Part of a complex that catalyzes the reversible cleavage of acetyl-CoA, allowing autotrophic growth from CO(2)	One carbon pool	ko00680,ko00720,ko01120,ko01200,map00680,map00720,map01120,map01200	2.1.1.245	CP002278.1	498952	500319
ADP77323.1	acetyl-CoA decarbonylase/synthase delta subunit	GCA_000166095.1	ADP77327.1	A	TRUE	C	COG2069@1|root,arCOG01980@2157|Archaea,2XTXS@28890|Euryarchaeota	Part of a complex that catalyzes the reversible cleavage of acetyl-CoA, allowing autotrophic growth from CO(2). Probably maintains the overall quaternary structure of the ACDS complex	One carbon pool	ko00680,ko00720,ko01120,ko01200,map00680,map00720,map01120,map01200	2.1.1.245	CP002278.1	500341	501495
ADP77323.1	acetyl-CoA decarbonylase/synthase delta subunit	GCA_000166095.1	ADP77327.1	A	TRUE	C	COG2069@1|root,arCOG01980@2157|Archaea,2XTXS@28890|Euryarchaeota	Part of a complex that catalyzes the reversible cleavage of acetyl-CoA, allowing autotrophic growth from CO(2). Probably maintains the overall quaternary structure of the ACDS complex	One carbon pool	ko00680,ko00720,ko01120,ko01200,map00680,map00720,map01120,map01200	2.1.1.245	CP002278.1	500341	501495
ADP77324.1	Cobyrinic acid ac-diamide synthase	GCA_000166095.1	ADP77327.1	A	TRUE	D	COG3640@1|root,arCOG00587@2157|Archaea,2XT61@28890|Euryarchaeota	PFAM Cobyrinic acid a,c-diamide synthase	CooC			CP002278.1	501497	502270
ADP77325.1	acetyl-CoA decarbonylase/synthase beta subunit	GCA_000166095.1	ADP77327.1	A	TRUE	C	COG1614@1|root,arCOG04360@2157|Archaea,2XU0D@28890|Euryarchaeota	Part of a complex that catalyzes the reversible cleavage of acetyl-CoA, allowing autotrophic growth from CO(2). The alpha- epsilon complex generates CO from CO(2), while the beta subunit (this protein) combines the CO with CoA and a methyl group to form acetyl-CoA. The methyl group, which is incorporated into acetyl- CoA, is transferred to the beta subunit by a corrinoid iron-sulfur protein (the …	One carbon pool	ko00680,ko01120,ko01200,map00680,map01120,map01200	1.2.7.4	CP002278.1	502278	503645
ADP77325.1	acetyl-CoA decarbonylase/synthase beta subunit	GCA_000166095.1	ADP77327.1	A	TRUE	C	COG1614@1|root,arCOG04360@2157|Archaea,2XU0D@28890|Euryarchaeota	Part of a complex that catalyzes the reversible cleavage of acetyl-CoA, allowing autotrophic growth from CO(2). The alpha- epsilon complex generates CO from CO(2), while the beta subunit (this protein) combines the CO with CoA and a methyl group to form acetyl-CoA. The methyl group, which is incorporated into acetyl- CoA, is transferred to the beta subunit by a corrinoid iron-sulfur protein (the …	One carbon pool	ko00680,ko01120,ko01200,map00680,map01120,map01200	1.2.7.4	CP002278.1	502278	503645
ADP77326.1	acetyl-CoA decarbonylase/synthase epsilon subunit	GCA_000166095.1	ADP77327.1	A	TRUE	C	COG1880@1|root,arCOG04408@2157|Archaea,2XWPE@28890|Euryarchaeota	Part of a complex that catalyzes the reversible cleavage of acetyl-CoA, allowing autotrophic growth from CO(2). The alpha- epsilon subcomponent functions as a carbon monoxide dehydrogenase. The precise role of the epsilon subunit is unclear	One carbon pool	ko00680,ko01120,ko01200,map00680,map01120,map01200		CP002278.1	503659	504138
ADP77326.1	acetyl-CoA decarbonylase/synthase epsilon subunit	GCA_000166095.1	ADP77327.1	A	TRUE	C	COG1880@1|root,arCOG04408@2157|Archaea,2XWPE@28890|Euryarchaeota	Part of a complex that catalyzes the reversible cleavage of acetyl-CoA, allowing autotrophic growth from CO(2). The alpha- epsilon subcomponent functions as a carbon monoxide dehydrogenase. The precise role of the epsilon subunit is unclear	One carbon pool	ko00680,ko01120,ko01200,map00680,map01120,map01200		CP002278.1	503659	504138
ADP77327.1	acetyl-CoA decarbonylase/synthase alpha subunit	GCA_000166095.1	ADP77327.1	A	FALSE	unknown		unknown	CODH			CP002278.1	504145	506469
AEF96913.1	CO dehydrogenase/acetyl-CoA synthase complex%2C beta subunit	GCA_000214415.1	AEF96916.1	A	TRUE	C	COG1152@1|root,COG1614@1|root,arCOG02428@2157|Archaea,arCOG04360@2157|Archaea,2XU0D@28890|Euryarchaeota,23Q7P@183939|Methanococci	Part of a complex that catalyzes the reversible cleavage of acetyl-CoA, allowing autotrophic growth from CO(2). The alpha- epsilon complex generates CO from CO(2), while the beta subunit (this protein) combines the CO with CoA and a methyl group to form acetyl-CoA. The methyl group, which is incorporated into acetyl- CoA, is transferred to the beta subunit by a corrinoid iron-sulfur protein (the …	One carbon pool	ko00680,ko01120,ko01200,map00680,map01120,map01200	1.2.7.4	CP002737.1	1401268	1402662
AEF96913.1	CO dehydrogenase/acetyl-CoA synthase complex%2C beta subunit	GCA_000214415.1	AEF96916.1	A	TRUE	C	COG1152@1|root,COG1614@1|root,arCOG02428@2157|Archaea,arCOG04360@2157|Archaea,2XU0D@28890|Euryarchaeota,23Q7P@183939|Methanococci	Part of a complex that catalyzes the reversible cleavage of acetyl-CoA, allowing autotrophic growth from CO(2). The alpha- epsilon complex generates CO from CO(2), while the beta subunit (this protein) combines the CO with CoA and a methyl group to form acetyl-CoA. The methyl group, which is incorporated into acetyl- CoA, is transferred to the beta subunit by a corrinoid iron-sulfur protein (the …	One carbon pool	ko00680,ko01120,ko01200,map00680,map01120,map01200	1.2.7.4	CP002737.1	1401268	1402662
AEF96914.1	4Fe-4S ferredoxin iron-sulfur binding domain-containing protein	GCA_000214415.1	AEF96916.1	A	TRUE	C	COG1142@1|root,arCOG01502@2157|Archaea,2XXPM@28890|Euryarchaeota,23QVU@183939|Methanococci	PFAM 4Fe-4S ferredoxin, iron-sulfur binding domain protein	FeS			CP002737.1	1402677	1403129
AEF96915.1	CO dehydrogenase/acetyl-CoA synthase complex%2C epsilon subunit	GCA_000214415.1	AEF96916.1	A	TRUE	C	COG1880@1|root,arCOG04408@2157|Archaea,2XZG7@28890|Euryarchaeota,23R6S@183939|Methanococci	PFAM CO dehydrogenase beta subunit acetyl-CoA synthase epsilon subunit	One carbon pool	ko00680,ko01120,ko01200,map00680,map01120,map01200		CP002737.1	1403197	1403640
AEF96915.1	CO dehydrogenase/acetyl-CoA synthase complex%2C epsilon subunit	GCA_000214415.1	AEF96916.1	A	TRUE	C	COG1880@1|root,arCOG04408@2157|Archaea,2XZG7@28890|Euryarchaeota,23R6S@183939|Methanococci	PFAM CO dehydrogenase beta subunit acetyl-CoA synthase epsilon subunit	One carbon pool	ko00680,ko01120,ko01200,map00680,map01120,map01200		CP002737.1	1403197	1403640
AEF96916.1	Acetyl-CoA decarbonylase/synthase complex subunit alpha	GCA_000214415.1	AEF96916.1	A	FALSE	unknown		unknown	CODH			CP002737.1	1403674	1406022
AFV25088.1	hypothetical protein	GCA_000306725.1	AFV25094.1	A	TRUE	unknown		unknown	unknown			CP003083.1	2766002	2766349
AFV25089.1	acetyl-CoA decarbonylase/synthase complex subunit gamma	GCA_000306725.1	AFV25094.1	A	TRUE	C	COG1456@1|root,arCOG01979@2157|Archaea,2XUSG@28890|Euryarchaeota,2N9BD@224756|Methanomicrobia	Part of a complex that catalyzes the reversible cleavage of acetyl-CoA, allowing	One carbon pool	ko00680,ko00720,ko01120,ko01200,map00680,map00720,map01120,map01200	2.1.1.245	CP003083.1	2766465	2767874
AFV25089.1	acetyl-CoA decarbonylase/synthase complex subunit gamma	GCA_000306725.1	AFV25094.1	A	TRUE	C	COG1456@1|root,arCOG01979@2157|Archaea,2XUSG@28890|Euryarchaeota,2N9BD@224756|Methanomicrobia	Part of a complex that catalyzes the reversible cleavage of acetyl-CoA, allowing	One carbon pool	ko00680,ko00720,ko01120,ko01200,map00680,map00720,map01120,map01200	2.1.1.245	CP003083.1	2766465	2767874
AFV25090.1	acetyl-CoA decarbonylase/synthase complex subunit delta	GCA_000306725.1	AFV25094.1	A	TRUE	C	COG2069@1|root,arCOG01980@2157|Archaea,2XTXS@28890|Euryarchaeota,2N93F@224756|Methanomicrobia	Part of a complex that catalyzes the reversible cleavage of acetyl-CoA, allowing	One carbon pool	ko00680,ko00720,ko01120,ko01200,map00680,map00720,map01120,map01200	2.1.1.245	CP003083.1	2767878	2769209
AFV25090.1	acetyl-CoA decarbonylase/synthase complex subunit delta	GCA_000306725.1	AFV25094.1	A	TRUE	C	COG2069@1|root,arCOG01980@2157|Archaea,2XTXS@28890|Euryarchaeota,2N93F@224756|Methanomicrobia	Part of a complex that catalyzes the reversible cleavage of acetyl-CoA, allowing	One carbon pool	ko00680,ko00720,ko01120,ko01200,map00680,map00720,map01120,map01200	2.1.1.245	CP003083.1	2767878	2769209
AFV25091.1	cobyrinic acid a%2Cc-diamide synthase	GCA_000306725.1	AFV25094.1	A	TRUE	D	COG3640@1|root,arCOG00587@2157|Archaea,2XT61@28890|Euryarchaeota,2N9QI@224756|Methanomicrobia	AAA domain	CooC			CP003083.1	2769253	2770005
AFV25092.1	acetyl-CoA decarbonylase/synthase complex subunit beta	GCA_000306725.1	AFV25094.1	A	TRUE	C	COG1614@1|root,arCOG04360@2157|Archaea,2XU0D@28890|Euryarchaeota,2N95I@224756|Methanomicrobia	Part of a complex that catalyzes the reversible cleavage of acetyl-CoA, allowing growth on acetate as sole source of carbon and energy. The alpha-epsilon complex generates CO from CO(2), while the beta subunit (this protein) combines the CO with CoA and a methyl group to form acetyl-CoA. The methyl group, which is incorporated into acetyl-CoA, is transferred to the beta subunit by a corrinoid iro…	One carbon pool	ko00680,ko01120,ko01200,map00680,map01120,map01200		CP003083.1	2770017	2771438
AFV25092.1	acetyl-CoA decarbonylase/synthase complex subunit beta	GCA_000306725.1	AFV25094.1	A	TRUE	C	COG1614@1|root,arCOG04360@2157|Archaea,2XU0D@28890|Euryarchaeota,2N95I@224756|Methanomicrobia	Part of a complex that catalyzes the reversible cleavage of acetyl-CoA, allowing growth on acetate as sole source of carbon and energy. The alpha-epsilon complex generates CO from CO(2), while the beta subunit (this protein) combines the CO with CoA and a methyl group to form acetyl-CoA. The methyl group, which is incorporated into acetyl-CoA, is transferred to the beta subunit by a corrinoid iro…	One carbon pool	ko00680,ko01120,ko01200,map00680,map01120,map01200		CP003083.1	2770017	2771438
AFV25093.1	CO dehydrogenase/acetyl-CoA synthase complex subunit epsilon	GCA_000306725.1	AFV25094.1	A	TRUE	C	COG1880@1|root,arCOG04408@2157|Archaea,2XWPE@28890|Euryarchaeota,2NA4Z@224756|Methanomicrobia	Part of a complex that catalyzes the reversible cleavage of acetyl-CoA, allowing growth on acetate as sole source of carbon and energy. The alpha-epsilon subcomponent functions as a carbon monoxide dehydrogenase. The precise role of the epsilon subunit is unclear	One carbon pool	ko00680,ko01120,ko01200,map00680,map01120,map01200		CP003083.1	2771469	2771981
AFV25093.1	CO dehydrogenase/acetyl-CoA synthase complex subunit epsilon	GCA_000306725.1	AFV25094.1	A	TRUE	C	COG1880@1|root,arCOG04408@2157|Archaea,2XWPE@28890|Euryarchaeota,2NA4Z@224756|Methanomicrobia	Part of a complex that catalyzes the reversible cleavage of acetyl-CoA, allowing growth on acetate as sole source of carbon and energy. The alpha-epsilon subcomponent functions as a carbon monoxide dehydrogenase. The precise role of the epsilon subunit is unclear	One carbon pool	ko00680,ko01120,ko01200,map00680,map01120,map01200		CP003083.1	2771469	2771981
AFV25094.1	CO dehydrogenase/acetyl-CoA synthase complex subunit epsilon	GCA_000306725.1	AFV25094.1	A	FALSE	unknown		unknown	CODH			CP003083.1	2771984	2774392
RZN67287.1	CO dehydrogenase/acetyl-CoA synthase complex subunit epsilon	GCA_004212085.1	RZN67287.1	A	FALSE	unknown		unknown	CODH			RXIL01000140.1	2238	4628
RZN67288.1	CO dehydrogenase/acetyl-CoA synthase complex subunit epsilon	GCA_004212085.1	RZN67287.1	A	TRUE	C	COG1880@1|root,arCOG04408@2157|Archaea,2XWPE@28890|Euryarchaeota,245XY@183980|Archaeoglobi	Part of a complex that catalyzes the reversible cleavage of acetyl-CoA, allowing autotrophic growth from CO(2). The alpha- epsilon subcomponent functions as a carbon monoxide dehydrogenase. The precise role of the epsilon subunit is unclear	One carbon pool	ko00680,ko01120,ko01200,map00680,map01120,map01200		RXIL01000140.1	4634	5161
RZN67288.1	CO dehydrogenase/acetyl-CoA synthase complex subunit epsilon	GCA_004212085.1	RZN67287.1	A	TRUE	C	COG1880@1|root,arCOG04408@2157|Archaea,2XWPE@28890|Euryarchaeota,245XY@183980|Archaeoglobi	Part of a complex that catalyzes the reversible cleavage of acetyl-CoA, allowing autotrophic growth from CO(2). The alpha- epsilon subcomponent functions as a carbon monoxide dehydrogenase. The precise role of the epsilon subunit is unclear	One carbon pool	ko00680,ko01120,ko01200,map00680,map01120,map01200		RXIL01000140.1	4634	5161
RZN67289.1	fructose 1%2C6-bisphosphatase	GCA_004212085.1	RZN67287.1	A	TRUE	G	COG1980@1|root,arCOG04180@2157|Archaea,2XTI0@28890|Euryarchaeota,3F2H5@33867|unclassified Euryarchaeota	Catalyzes two subsequent steps in gluconeogenesis the aldol condensation of dihydroxyacetone phosphate (DHAP) and glyceraldehyde-3-phosphate (GA3P) to fructose-1,6-bisphosphate (FBP), and the dephosphorylation of FBP to fructose-6-phosphate (F6P)	unknown	ko00010,ko00030,ko00051,ko00680,ko01100,ko01110,ko01120,ko01130,ko01200,ko01230,map00010,map00030,map00051,map00680,map01100,map01110,map01120,map01130,map01200,map01230	3.1.3.11,4.1.2.13	RXIL01000140.1	5328	6440
RZN67290.1	triose-phosphate isomerase	GCA_004212085.1	RZN67287.1	A	TRUE	G	COG0149@1|root,arCOG01087@2157|Archaea,2XTY3@28890|Euryarchaeota,23NS2@183925|Methanobacteria	Involved in the gluconeogenesis. Catalyzes stereospecifically the conversion of dihydroxyacetone phosphate (DHAP) to D-glyceraldehyde-3-phosphate (G3P)	unknown	ko00010,ko00051,ko00562,ko00710,ko01100,ko01110,ko01120,ko01130,ko01200,ko01230,map00010,map00051,map00562,map00710,map01100,map01110,map01120,map01130,map01200,map01230	5.3.1.1	RXIL01000140.1	6437	7111
NLK32591.1	CO dehydrogenase/acetyl-CoA synthase complex subunit epsilon	GCA_012519275.1	NLK32591.1	A	FALSE	unknown		unknown	CODH			JAAYQL010000041.1	33835	36246
NLK32592.1	CO dehydrogenase/acetyl-CoA synthase complex subunit epsilon	GCA_012519275.1	NLK32591.1	A	TRUE	C	COG1880@1|root,arCOG04408@2157|Archaea,2XWPE@28890|Euryarchaeota,2NA4Z@224756|Methanomicrobia	Part of a complex that catalyzes the reversible cleavage of acetyl-CoA, allowing growth on acetate as sole source of carbon and energy. The alpha-epsilon subcomponent functions as a carbon monoxide dehydrogenase. The precise role of the epsilon subunit is unclear	One carbon pool	ko00680,ko01120,ko01200,map00680,map01120,map01200		JAAYQL010000041.1	36249	36761
NLK32592.1	CO dehydrogenase/acetyl-CoA synthase complex subunit epsilon	GCA_012519275.1	NLK32591.1	A	TRUE	C	COG1880@1|root,arCOG04408@2157|Archaea,2XWPE@28890|Euryarchaeota,2NA4Z@224756|Methanomicrobia	Part of a complex that catalyzes the reversible cleavage of acetyl-CoA, allowing growth on acetate as sole source of carbon and energy. The alpha-epsilon subcomponent functions as a carbon monoxide dehydrogenase. The precise role of the epsilon subunit is unclear	One carbon pool	ko00680,ko01120,ko01200,map00680,map01120,map01200		JAAYQL010000041.1	36249	36761
NLK32593.1	CO dehydrogenase/CO-methylating acetyl-CoA synthase complex subunit beta	GCA_012519275.1	NLK32591.1	A	TRUE	C	COG1614@1|root,arCOG04360@2157|Archaea,2XU0D@28890|Euryarchaeota,2N95I@224756|Methanomicrobia	Part of a complex that catalyzes the reversible cleavage of acetyl-CoA, allowing growth on acetate as sole source of carbon and energy. The alpha-epsilon complex generates CO from CO(2), while the beta subunit (this protein) combines the CO with CoA and a methyl group to form acetyl-CoA. The methyl group, which is incorporated into acetyl-CoA, is transferred to the beta subunit by a corrinoid iro…	One carbon pool	ko00680,ko01120,ko01200,map00680,map01120,map01200		JAAYQL010000041.1	36785	38203
NLK32593.1	CO dehydrogenase/CO-methylating acetyl-CoA synthase complex subunit beta	GCA_012519275.1	NLK32591.1	A	TRUE	C	COG1614@1|root,arCOG04360@2157|Archaea,2XU0D@28890|Euryarchaeota,2N95I@224756|Methanomicrobia	Part of a complex that catalyzes the reversible cleavage of acetyl-CoA, allowing growth on acetate as sole source of carbon and energy. The alpha-epsilon complex generates CO from CO(2), while the beta subunit (this protein) combines the CO with CoA and a methyl group to form acetyl-CoA. The methyl group, which is incorporated into acetyl-CoA, is transferred to the beta subunit by a corrinoid iro…	One carbon pool	ko00680,ko01120,ko01200,map00680,map01120,map01200		JAAYQL010000041.1	36785	38203
NLK32594.1	AAA family ATPase	GCA_012519275.1	NLK32591.1	A	TRUE	D	COG3640@1|root,arCOG00587@2157|Archaea,2XT61@28890|Euryarchaeota,2N9QI@224756|Methanomicrobia	AAA domain	CooC			JAAYQL010000041.1	38260	39021
NLK32595.1	CO dehydrogenase/acetyl-CoA synthase subunit delta	GCA_012519275.1	NLK32591.1	A	TRUE	C	COG2069@1|root,arCOG01980@2157|Archaea,2XTXS@28890|Euryarchaeota,2N93F@224756|Methanomicrobia	Part of a complex that catalyzes the reversible cleavage of acetyl-CoA, allowing	One carbon pool	ko00680,ko00720,ko01120,ko01200,map00680,map00720,map01120,map01200	2.1.1.245	JAAYQL010000041.1	39302	40615
NLK32595.1	CO dehydrogenase/acetyl-CoA synthase subunit delta	GCA_012519275.1	NLK32591.1	A	TRUE	C	COG2069@1|root,arCOG01980@2157|Archaea,2XTXS@28890|Euryarchaeota,2N93F@224756|Methanomicrobia	Part of a complex that catalyzes the reversible cleavage of acetyl-CoA, allowing	One carbon pool	ko00680,ko00720,ko01120,ko01200,map00680,map00720,map01120,map01200	2.1.1.245	JAAYQL010000041.1	39302	40615
NLK32596.1	acetyl-CoA decarbonylase/synthase complex subunit gamma	GCA_012519275.1	NLK32591.1	A	TRUE	C	COG1456@1|root,arCOG01979@2157|Archaea,2XUSG@28890|Euryarchaeota,2N9BD@224756|Methanomicrobia	Part of a complex that catalyzes the reversible cleavage of acetyl-CoA, allowing	One carbon pool	ko00680,ko00720,ko01120,ko01200,map00680,map00720,map01120,map01200	2.1.1.245	JAAYQL010000041.1	40619	42028
NLK32596.1	acetyl-CoA decarbonylase/synthase complex subunit gamma	GCA_012519275.1	NLK32591.1	A	TRUE	C	COG1456@1|root,arCOG01979@2157|Archaea,2XUSG@28890|Euryarchaeota,2N9BD@224756|Methanomicrobia	Part of a complex that catalyzes the reversible cleavage of acetyl-CoA, allowing	One carbon pool	ko00680,ko00720,ko01120,ko01200,map00680,map00720,map01120,map01200	2.1.1.245	JAAYQL010000041.1	40619	42028
HIP16999.1	CO dehydrogenase/acetyl-CoA synthase complex subunit epsilon	GCA_015663075.1	HIP16999.1	A	FALSE	unknown		unknown	CODH			DQSV01000035.1	6832	9159
MBT9130464.1	Carbon monoxide dehydrogenase	GCA_018725175.1	MBT9130464.1	A	FALSE	unknown		unknown	CODH			QLTX01000031.1	217	2517
MBT9130465.1	hypothetical protein	GCA_018725175.1	MBT9130464.1	A	TRUE	C	COG1810@1|root,COG1905@1|root,COG1810@2|Bacteria,COG1905@2|Bacteria,1V737@1239|Firmicutes,24HFB@186801|Clostridia,261VF@186807|Peptococcaceae	PFAM Respiratory-chain NADH dehydrogenase 24 Kd subunit	NAD(P)/FAD-dependent oxidoreductase	ko00190,ko01100,map00190,map01100	1.6.5.3	QLTX01000031.1	2532	3239
MBT9130466.1	hypothetical protein	GCA_018725175.1	MBT9130464.1	A	TRUE	C	COG1880@1|root,COG1880@2|Bacteria	PFAM CO dehydrogenase beta subunit acetyl-CoA synthase epsilon subunit	One carbon pool	ko00680,ko00785,ko01100,ko01120,ko01200,map00680,map00785,map01100,map01120,map01200	6.3.1.20	QLTX01000031.1	3260	3775
MBT9130466.1	hypothetical protein	GCA_018725175.1	MBT9130464.1	A	TRUE	C	COG1880@1|root,COG1880@2|Bacteria	PFAM CO dehydrogenase beta subunit acetyl-CoA synthase epsilon subunit	One carbon pool	ko00680,ko00785,ko01100,ko01120,ko01200,map00680,map00785,map01100,map01120,map01200	6.3.1.20	QLTX01000031.1	3260	3775
MBT9130467.1	Carbon monoxide dehydrogenase/acetyl-CoA synthase subunit alpha	GCA_018725175.1	MBT9130464.1	A	TRUE	C	COG1614@1|root,COG1614@2|Bacteria,1TSWZ@1239|Firmicutes,248Y2@186801|Clostridia,2618Z@186807|Peptococcaceae	PFAM CO dehydrogenase acetyl-CoA synthase complex beta subunit	One carbon pool	ko00680,ko00720,ko01120,ko01200,map00680,map00720,map01120,map01200	2.3.1.169	QLTX01000031.1	3791	4987
MBT9130467.1	Carbon monoxide dehydrogenase/acetyl-CoA synthase subunit alpha	GCA_018725175.1	MBT9130464.1	A	TRUE	C	COG1614@1|root,COG1614@2|Bacteria,1TSWZ@1239|Firmicutes,248Y2@186801|Clostridia,2618Z@186807|Peptococcaceae	PFAM CO dehydrogenase acetyl-CoA synthase complex beta subunit	One carbon pool	ko00680,ko00720,ko01120,ko01200,map00680,map00720,map01120,map01200	2.3.1.169	QLTX01000031.1	3791	4987
MBT9130468.1	Corrinoid/iron-sulfur protein large subunit	GCA_018725175.1	MBT9130464.1	A	TRUE	C	COG1456@1|root,COG1456@2|Bacteria,1TPWJ@1239|Firmicutes,24CTU@186801|Clostridia,2607K@186807|Peptococcaceae	CO dehydrogenase acetyl-CoA synthase delta subunit	One carbon pool	ko00680,ko00720,ko01120,ko01200,map00680,map00720,map01120,map01200	2.1.1.245	QLTX01000031.1	5001	6374
MBT9130468.1	Corrinoid/iron-sulfur protein large subunit	GCA_018725175.1	MBT9130464.1	A	TRUE	C	COG1456@1|root,COG1456@2|Bacteria,1TPWJ@1239|Firmicutes,24CTU@186801|Clostridia,2607K@186807|Peptococcaceae	CO dehydrogenase acetyl-CoA synthase delta subunit	One carbon pool	ko00680,ko00720,ko01120,ko01200,map00680,map00720,map01120,map01200	2.1.1.245	QLTX01000031.1	5001	6374
MBT9130469.1	NADP-reducing hydrogenase subunit HndA	GCA_018725175.1	MBT9130464.1	A	TRUE	C	COG1905@1|root,COG1905@2|Bacteria,1RHBU@1224|Proteobacteria,42U8S@68525|delta/epsilon subdivisions,2WQ8V@28221|Deltaproteobacteria,2MKT7@213118|Desulfobacterales	PFAM NADH dehydrogenase (ubiquinone) 24 kDa subunit	NAD(P)/FAD-dependent oxidoreductase	ko00190,ko01100,map00190,map01100	1.6.5.3	QLTX01000031.1	6353	6829
MBT9130470.1	NADP-reducing hydrogenase subunit HndC	GCA_018725175.1	MBT9130464.1	A	TRUE	C	COG1894@1|root,COG1894@2|Bacteria,1TQB0@1239|Firmicutes,24D58@186801|Clostridia,2618B@186807|Peptococcaceae	NADH ubiquinone oxidoreductase, F subunit, iron sulphur binding	unknown	ko00190,ko01100,map00190,map01100	1.6.5.3	QLTX01000031.1	6810	8687
MBT9130471.1	Cell wall-binding protein YocH	GCA_018725175.1	MBT9130464.1	A	TRUE	S	COG3583@1|root,COG3584@1|root,COG3583@2|Bacteria,COG3584@2|Bacteria,1TTIK@1239|Firmicutes,24997@186801|Clostridia,42ETJ@68295|Thermoanaerobacterales	G5 domain protein	unknown			QLTX01000031.1	8756	9751
MBT9130472.1	hypothetical protein	GCA_018725175.1	MBT9130464.1	A	TRUE	S	2E36T@1|root,32Y6H@2|Bacteria,1VEXQ@1239|Firmicutes,24RAE@186801|Clostridia,36KR8@31979|Clostridiaceae	Psort location Cytoplasmic, score	unknown			QLTX01000031.1	9804	10160
QXO95214.1	AAA family ATPase	GCA_019263745.1	QXO95216.1	A	TRUE	D	COG3640@1|root,arCOG00587@2157|Archaea,2XW7J@28890|Euryarchaeota,2N9VV@224756|Methanomicrobia	PFAM Cobyrinic acid a,c-diamide synthase	CooC			CP077107.1	411403	412182
QXO95215.1	AAA family ATPase	GCA_019263745.1	QXO95216.1	A	TRUE	D	COG3640@1|root,arCOG00587@2157|Archaea	PFAM Cobyrinic acid a,c-diamide synthase	CooC			CP077107.1	412179	412961
QXO95216.1	CO dehydrogenase/acetyl-CoA synthase complex subunit epsilon	GCA_019263745.1	QXO95216.1	A	FALSE	unknown		unknown	CODH			CP077107.1	413011	415371
QXO95217.1	CO dehydrogenase/acetyl-CoA synthase complex subunit epsilon	GCA_019263745.1	QXO95216.1	A	TRUE	C	COG1880@1|root,arCOG04408@2157|Archaea,2XWPE@28890|Euryarchaeota	Part of a complex that catalyzes the reversible cleavage of acetyl-CoA, allowing autotrophic growth from CO(2). The alpha- epsilon subcomponent functions as a carbon monoxide dehydrogenase. The precise role of the epsilon subunit is unclear	One carbon pool	ko00680,ko01120,ko01200,map00680,map01120,map01200		CP077107.1	415371	415940
QXO95217.1	CO dehydrogenase/acetyl-CoA synthase complex subunit epsilon	GCA_019263745.1	QXO95216.1	A	TRUE	C	COG1880@1|root,arCOG04408@2157|Archaea,2XWPE@28890|Euryarchaeota	Part of a complex that catalyzes the reversible cleavage of acetyl-CoA, allowing autotrophic growth from CO(2). The alpha- epsilon subcomponent functions as a carbon monoxide dehydrogenase. The precise role of the epsilon subunit is unclear	One carbon pool	ko00680,ko01120,ko01200,map00680,map01120,map01200		CP077107.1	415371	415940
QXO95218.1	CO dehydrogenase/CO-methylating acetyl-CoA synthase complex subunit beta	GCA_019263745.1	QXO95216.1	A	TRUE	C	COG1614@1|root,arCOG04360@2157|Archaea,2XU0D@28890|Euryarchaeota,2N95I@224756|Methanomicrobia	Part of a complex that catalyzes the reversible cleavage of acetyl-CoA, allowing growth on acetate as sole source of carbon and energy. The alpha-epsilon complex generates CO from CO(2), while the beta subunit (this protein) combines the CO with CoA and a methyl group to form acetyl-CoA. The methyl group, which is incorporated into acetyl-CoA, is transferred to the beta subunit by a corrinoid iro…	One carbon pool	ko00680,ko01120,ko01200,map00680,map01120,map01200		CP077107.1	415933	417336
QXO95218.1	CO dehydrogenase/CO-methylating acetyl-CoA synthase complex subunit beta	GCA_019263745.1	QXO95216.1	A	TRUE	C	COG1614@1|root,arCOG04360@2157|Archaea,2XU0D@28890|Euryarchaeota,2N95I@224756|Methanomicrobia	Part of a complex that catalyzes the reversible cleavage of acetyl-CoA, allowing growth on acetate as sole source of carbon and energy. The alpha-epsilon complex generates CO from CO(2), while the beta subunit (this protein) combines the CO with CoA and a methyl group to form acetyl-CoA. The methyl group, which is incorporated into acetyl-CoA, is transferred to the beta subunit by a corrinoid iro…	One carbon pool	ko00680,ko01120,ko01200,map00680,map01120,map01200		CP077107.1	415933	417336
QXO95219.1	CO dehydrogenase/acetyl-CoA synthase subunit delta	GCA_019263745.1	QXO95216.1	A	TRUE	C	COG2069@1|root,arCOG01980@2157|Archaea,2XTXS@28890|Euryarchaeota,2N93F@224756|Methanomicrobia	Part of a complex that catalyzes the reversible cleavage of acetyl-CoA, allowing	One carbon pool	ko00680,ko00720,ko01120,ko01200,map00680,map00720,map01120,map01200	2.1.1.245	CP077107.1	417329	418579
QXO95219.1	CO dehydrogenase/acetyl-CoA synthase subunit delta	GCA_019263745.1	QXO95216.1	A	TRUE	C	COG2069@1|root,arCOG01980@2157|Archaea,2XTXS@28890|Euryarchaeota,2N93F@224756|Methanomicrobia	Part of a complex that catalyzes the reversible cleavage of acetyl-CoA, allowing	One carbon pool	ko00680,ko00720,ko01120,ko01200,map00680,map00720,map01120,map01200	2.1.1.245	CP077107.1	417329	418579
QXO95220.1	acetyl-CoA decarbonylase/synthase complex subunit gamma	GCA_019263745.1	QXO95216.1	A	TRUE	C	COG1456@1|root,arCOG01979@2157|Archaea,2XUSG@28890|Euryarchaeota,2N9BD@224756|Methanomicrobia	Part of a complex that catalyzes the reversible cleavage of acetyl-CoA, allowing	One carbon pool	ko00680,ko00720,ko01120,ko01200,map00680,map00720,map01120,map01200	2.1.1.245	CP077107.1	418590	420020
QXO95220.1	acetyl-CoA decarbonylase/synthase complex subunit gamma	GCA_019263745.1	QXO95216.1	A	TRUE	C	COG1456@1|root,arCOG01979@2157|Archaea,2XUSG@28890|Euryarchaeota,2N9BD@224756|Methanomicrobia	Part of a complex that catalyzes the reversible cleavage of acetyl-CoA, allowing	One carbon pool	ko00680,ko00720,ko01120,ko01200,map00680,map00720,map01120,map01200	2.1.1.245	CP077107.1	418590	420020
QXO96320.1	DUF4445 domain-containing protein	GCA_019263745.1	QXO95216.1	A	TRUE	C	COG3894@1|root,arCOG02035@2157|Archaea,2XVBE@28890|Euryarchaeota,2NB3A@224756|Methanomicrobia	Domain of unknown function (DUF4445)	FeS			CP077107.1	420058	421854
MCC7561228.1	CO dehydrogenase/acetyl-CoA synthase complex subunit epsilon	GCA_020854875.1	MCC7561229.1	A	TRUE	C	COG1880@1|root,arCOG04408@2157|Archaea,2XWPE@28890|Euryarchaeota	Part of a complex that catalyzes the reversible cleavage of acetyl-CoA, allowing autotrophic growth from CO(2). The alpha- epsilon subcomponent functions as a carbon monoxide dehydrogenase. The precise role of the epsilon subunit is unclear	One carbon pool	ko00680,ko01120,ko01200,map00680,map01120,map01200		JAHKLU010000003.1	14480	14992
MCC7561228.1	CO dehydrogenase/acetyl-CoA synthase complex subunit epsilon	GCA_020854875.1	MCC7561229.1	A	TRUE	C	COG1880@1|root,arCOG04408@2157|Archaea,2XWPE@28890|Euryarchaeota	Part of a complex that catalyzes the reversible cleavage of acetyl-CoA, allowing autotrophic growth from CO(2). The alpha- epsilon subcomponent functions as a carbon monoxide dehydrogenase. The precise role of the epsilon subunit is unclear	One carbon pool	ko00680,ko01120,ko01200,map00680,map01120,map01200		JAHKLU010000003.1	14480	14992
MCC7561229.1	CO dehydrogenase/acetyl-CoA synthase complex subunit epsilon	GCA_020854875.1	MCC7561229.1	A	FALSE	unknown		unknown	CODH			JAHKLU010000003.1	15093	17465
MCR6669333.1	DUF3786 domain-containing protein	GCA_024707065.1	MCR6669340.1	A	TRUE	C	COG1456@1|root,COG1456@2|Bacteria,1UIEM@1239|Firmicutes,25EJY@186801|Clostridia,42GZB@68295|Thermoanaerobacterales	Domain of unknown function (DUF3786)	unknown			JANGFS010000076.1	640	1263
MCR6669334.1	AAA family ATPase	GCA_024707065.1	MCR6669340.1	A	TRUE	D	COG3640@1|root,arCOG00587@2157|Archaea,2XT61@28890|Euryarchaeota,23QPT@183939|Methanococci	PFAM Cobyrinic acid a,c-diamide synthase	CooC			JANGFS010000076.1	1282	2058
MCR6669335.1	ASKHA domain-containing protein	GCA_024707065.1	MCR6669340.1	A	TRUE	C	COG0633@1|root,COG3894@1|root,arCOG02035@2157|Archaea,arCOG02842@2157|Archaea,2XVBE@28890|Euryarchaeota,246TE@183980|Archaeoglobi	Domain of unknown function (DUF4445)	One carbon pool			JANGFS010000076.1	2100	3968
MCR6669335.1	ASKHA domain-containing protein	GCA_024707065.1	MCR6669340.1	A	TRUE	C	COG0633@1|root,COG3894@1|root,arCOG02035@2157|Archaea,arCOG02842@2157|Archaea,2XVBE@28890|Euryarchaeota,246TE@183980|Archaeoglobi	Domain of unknown function (DUF4445)	One carbon pool			JANGFS010000076.1	2100	3968
MCR6669336.1	acetyl-CoA decarbonylase/synthase complex subunit gamma	GCA_024707065.1	MCR6669340.1	A	TRUE	C	COG1456@1|root,arCOG01979@2157|Archaea,2XUSG@28890|Euryarchaeota,2N9BD@224756|Methanomicrobia	Part of a complex that catalyzes the reversible cleavage of acetyl-CoA, allowing	One carbon pool	ko00680,ko00720,ko01120,ko01200,map00680,map00720,map01120,map01200	2.1.1.245	JANGFS010000076.1	3975	5414
MCR6669336.1	acetyl-CoA decarbonylase/synthase complex subunit gamma	GCA_024707065.1	MCR6669340.1	A	TRUE	C	COG1456@1|root,arCOG01979@2157|Archaea,2XUSG@28890|Euryarchaeota,2N9BD@224756|Methanomicrobia	Part of a complex that catalyzes the reversible cleavage of acetyl-CoA, allowing	One carbon pool	ko00680,ko00720,ko01120,ko01200,map00680,map00720,map01120,map01200	2.1.1.245	JANGFS010000076.1	3975	5414
MCR6669337.1	CO dehydrogenase/acetyl-CoA synthase subunit delta	GCA_024707065.1	MCR6669340.1	A	TRUE	C	COG2069@1|root,arCOG01980@2157|Archaea,2XTXS@28890|Euryarchaeota,2N93F@224756|Methanomicrobia	Part of a complex that catalyzes the reversible cleavage of acetyl-CoA, allowing	One carbon pool	ko00680,ko00720,ko01120,ko01200,map00680,map00720,map01120,map01200	2.1.1.245	JANGFS010000076.1	5416	6657
MCR6669337.1	CO dehydrogenase/acetyl-CoA synthase subunit delta	GCA_024707065.1	MCR6669340.1	A	TRUE	C	COG2069@1|root,arCOG01980@2157|Archaea,2XTXS@28890|Euryarchaeota,2N93F@224756|Methanomicrobia	Part of a complex that catalyzes the reversible cleavage of acetyl-CoA, allowing	One carbon pool	ko00680,ko00720,ko01120,ko01200,map00680,map00720,map01120,map01200	2.1.1.245	JANGFS010000076.1	5416	6657
MCR6669338.1	CO dehydrogenase/CO-methylating acetyl-CoA synthase complex subunit beta	GCA_024707065.1	MCR6669340.1	A	TRUE	C	COG1614@1|root,arCOG04360@2157|Archaea,2XU0D@28890|Euryarchaeota,2N95I@224756|Methanomicrobia	Part of a complex that catalyzes the reversible cleavage of acetyl-CoA, allowing growth on acetate as sole source of carbon and energy. The alpha-epsilon complex generates CO from CO(2), while the beta subunit (this protein) combines the CO with CoA and a methyl group to form acetyl-CoA. The methyl group, which is incorporated into acetyl-CoA, is transferred to the beta subunit by a corrinoid iro…	One carbon pool	ko00680,ko01120,ko01200,map00680,map01120,map01200		JANGFS010000076.1	6654	8060
MCR6669338.1	CO dehydrogenase/CO-methylating acetyl-CoA synthase complex subunit beta	GCA_024707065.1	MCR6669340.1	A	TRUE	C	COG1614@1|root,arCOG04360@2157|Archaea,2XU0D@28890|Euryarchaeota,2N95I@224756|Methanomicrobia	Part of a complex that catalyzes the reversible cleavage of acetyl-CoA, allowing growth on acetate as sole source of carbon and energy. The alpha-epsilon complex generates CO from CO(2), while the beta subunit (this protein) combines the CO with CoA and a methyl group to form acetyl-CoA. The methyl group, which is incorporated into acetyl-CoA, is transferred to the beta subunit by a corrinoid iro…	One carbon pool	ko00680,ko01120,ko01200,map00680,map01120,map01200		JANGFS010000076.1	6654	8060
MCR6669339.1	hypothetical protein	GCA_024707065.1	MCR6669340.1	A	TRUE	C	COG1880@1|root,arCOG04408@2157|Archaea,2XWPE@28890|Euryarchaeota,2NA4Z@224756|Methanomicrobia	Part of a complex that catalyzes the reversible cleavage of acetyl-CoA, allowing growth on acetate as sole source of carbon and energy. The alpha-epsilon subcomponent functions as a carbon monoxide dehydrogenase. The precise role of the epsilon subunit is unclear	One carbon pool	ko00680,ko01120,ko01200,map00680,map01120,map01200		JANGFS010000076.1	8215	8748
MCR6669339.1	hypothetical protein	GCA_024707065.1	MCR6669340.1	A	TRUE	C	COG1880@1|root,arCOG04408@2157|Archaea,2XWPE@28890|Euryarchaeota,2NA4Z@224756|Methanomicrobia	Part of a complex that catalyzes the reversible cleavage of acetyl-CoA, allowing growth on acetate as sole source of carbon and energy. The alpha-epsilon subcomponent functions as a carbon monoxide dehydrogenase. The precise role of the epsilon subunit is unclear	One carbon pool	ko00680,ko01120,ko01200,map00680,map01120,map01200		JANGFS010000076.1	8215	8748
MCR6669340.1	CO dehydrogenase/acetyl-CoA synthase complex subunit alpha	GCA_024707065.1	MCR6669340.1	A	FALSE	unknown		unknown	CODH			JANGFS010000076.1	8745	11117
MCR6669341.1	AAA family ATPase	GCA_024707065.1	MCR6669340.1	A	TRUE	D	COG3640@1|root,COG3640@2|Bacteria,1TPCY@1239|Firmicutes,247JM@186801|Clostridia,42F6P@68295|Thermoanaerobacterales	CO dehydrogenase	CooC			JANGFS010000076.1	11211	11978
MCR6669342.1	CooT family nickel-binding protein	GCA_024707065.1	MCR6669340.1	A	TRUE	unknown		unknown	CooT			JANGFS010000076.1	11990	12187
MCR6669343.1	coenzyme F420-0:L-glutamate ligase	GCA_024707065.1	MCR6669340.1	A	TRUE	H	COG4071@1|root,arCOG02715@2157|Archaea,2XUMN@28890|Euryarchaeota,23Q3S@183939|Methanococci	F420-0:Gamma-glutamyl ligase	unknown			JANGFS010000076.1	12243	13100
MCS7369266.1	coenzyme F420-0:L-glutamate ligase	GCA_025060975.1	MCS7369269.1	A	TRUE	H	COG4071@1|root,arCOG02715@2157|Archaea,2XUMN@28890|Euryarchaeota,23Q3S@183939|Methanococci	F420-0:Gamma-glutamyl ligase	unknown			JANZKA010000049.1	3519	4391
MCS7369267.1	CooT family nickel-binding protein	GCA_025060975.1	MCS7369269.1	A	TRUE	unknown		unknown	CooT			JANZKA010000049.1	4450	4644
MCS7369268.1	AAA family ATPase	GCA_025060975.1	MCS7369269.1	A	TRUE	D	COG3640@1|root,COG3640@2|Bacteria,1TPCY@1239|Firmicutes,247JM@186801|Clostridia,42F6P@68295|Thermoanaerobacterales	CO dehydrogenase	CooC			JANZKA010000049.1	4656	5435
MCS7369269.1	CO dehydrogenase/acetyl-CoA synthase complex subunit alpha	GCA_025060975.1	MCS7369269.1	A	FALSE	unknown		unknown	CODH			JANZKA010000049.1	5514	7828
MCS7365770.1	CO dehydrogenase/acetyl-CoA synthase complex subunit alpha	GCA_025061245.1	MCS7365770.1	A	FALSE	unknown		unknown	CODH			JANZKD010000206.1	1	2313
MCS7365771.1	AAA family ATPase	GCA_025061245.1	MCS7365770.1	A	TRUE	D	COG3640@1|root,arCOG00587@2157|Archaea,2XT61@28890|Euryarchaeota	PFAM Cobyrinic acid a,c-diamide synthase	CooC			JANZKD010000206.1	2429	3202
MCS7365772.1	nucleotidyltransferase domain-containing protein	GCA_025061245.1	MCS7365770.1	A	TRUE	S	COG1665@1|root,arCOG01831@2157|Archaea,2XVY6@28890|Euryarchaeota,23NTJ@183925|Methanobacteria	DNA polymerase beta domain protein region	unknown			JANZKD010000206.1	3254	4276
MCW7075119.1	hypothetical protein	GCA_026134045.1	MCW7075124.1	A	TRUE	unknown	arCOG10681@1|root,arCOG10681@2157|Archaea,2Y3ZN@28890|Euryarchaeota,23RNU@183939|Methanococci	unknown	unknown			JAOQIH010000005.1	2273	2893
MCW7075120.1	radical SAM protein	GCA_026134045.1	MCW7075124.1	A	TRUE	I	COG0535@1|root,COG0535@2|Bacteria	radical SAM domain protein	radical SAM protein			JAOQIH010000005.1	2907	3746
MCW7075121.1	hypothetical protein	GCA_026134045.1	MCW7075124.1	A	TRUE	unknown		unknown	unknown			JAOQIH010000005.1	3793	3957
MCW7075122.1	FmdE family protein	GCA_026134045.1	MCW7075124.1	A	TRUE	S	COG5643@1|root,COG5643@2|Bacteria,1VUWT@1239|Firmicutes	FmdE, Molybdenum formylmethanofuran dehydrogenase operon	unknown			JAOQIH010000005.1	4054	5400
MCW7075123.1	CO dehydrogenase/acetyl-CoA synthase complex subunit epsilon	GCA_026134045.1	MCW7075124.1	A	TRUE	C	COG1880@1|root,arCOG04408@2157|Archaea,2XWPE@28890|Euryarchaeota,245XY@183980|Archaeoglobi	Part of a complex that catalyzes the reversible cleavage of acetyl-CoA, allowing autotrophic growth from CO(2). The alpha- epsilon subcomponent functions as a carbon monoxide dehydrogenase. The precise role of the epsilon subunit is unclear	One carbon pool	ko00680,ko01120,ko01200,map00680,map01120,map01200		JAOQIH010000005.1	5674	6207
MCW7075123.1	CO dehydrogenase/acetyl-CoA synthase complex subunit epsilon	GCA_026134045.1	MCW7075124.1	A	TRUE	C	COG1880@1|root,arCOG04408@2157|Archaea,2XWPE@28890|Euryarchaeota,245XY@183980|Archaeoglobi	Part of a complex that catalyzes the reversible cleavage of acetyl-CoA, allowing autotrophic growth from CO(2). The alpha- epsilon subcomponent functions as a carbon monoxide dehydrogenase. The precise role of the epsilon subunit is unclear	One carbon pool	ko00680,ko01120,ko01200,map00680,map01120,map01200		JAOQIH010000005.1	5674	6207
MCW7075124.1	CO dehydrogenase/acetyl-CoA synthase complex subunit alpha	GCA_026134045.1	MCW7075124.1	A	FALSE	unknown		unknown	CODH			JAOQIH010000005.1	6380	8767
MCW7075125.1	Coenzyme F420 hydrogenase/dehydrogenase%2C beta subunit C-terminal domain	GCA_026134045.1	MCW7075124.1	A	TRUE	C	COG1035@1|root,arCOG02650@2157|Archaea,2XVXF@28890|Euryarchaeota,2462X@183980|Archaeoglobi	PFAM Coenzyme F420 hydrogenase dehydrogenase beta subunit	Hydrogenase	ko00680,ko01100,ko01120,map00680,map01100,map01120	1.1.98.4,1.12.98.1	JAOQIH010000005.1	8836	9954
MCW7079038.1	CO dehydrogenase/acetyl-CoA synthase complex subunit epsilon	GCA_026134085.1	MCW7079039.1	A	TRUE	C	COG1880@1|root,arCOG04408@2157|Archaea,2XWPE@28890|Euryarchaeota,245XY@183980|Archaeoglobi	Part of a complex that catalyzes the reversible cleavage of acetyl-CoA, allowing autotrophic growth from CO(2). The alpha- epsilon subcomponent functions as a carbon monoxide dehydrogenase. The precise role of the epsilon subunit is unclear	One carbon pool	ko00680,ko01120,ko01200,map00680,map01120,map01200		JAOQIN010000036.1	5344	5877
MCW7079038.1	CO dehydrogenase/acetyl-CoA synthase complex subunit epsilon	GCA_026134085.1	MCW7079039.1	A	TRUE	C	COG1880@1|root,arCOG04408@2157|Archaea,2XWPE@28890|Euryarchaeota,245XY@183980|Archaeoglobi	Part of a complex that catalyzes the reversible cleavage of acetyl-CoA, allowing autotrophic growth from CO(2). The alpha- epsilon subcomponent functions as a carbon monoxide dehydrogenase. The precise role of the epsilon subunit is unclear	One carbon pool	ko00680,ko01120,ko01200,map00680,map01120,map01200		JAOQIN010000036.1	5344	5877
MCW7079039.1	CO dehydrogenase/acetyl-CoA synthase complex subunit alpha	GCA_026134085.1	MCW7079039.1	A	FALSE	unknown		unknown	CODH			JAOQIN010000036.1	5954	8338
MCW7079040.1	Coenzyme F420 hydrogenase/dehydrogenase%2C beta subunit C-terminal domain	GCA_026134085.1	MCW7079039.1	A	TRUE	C	COG1035@1|root,arCOG02650@2157|Archaea,2XVXF@28890|Euryarchaeota,2462X@183980|Archaeoglobi	PFAM Coenzyme F420 hydrogenase dehydrogenase beta subunit	Hydrogenase	ko00680,ko01100,ko01120,map00680,map01100,map01120	1.1.98.4,1.12.98.1	JAOQIN010000036.1	8459	9583
MCW7079041.1	N-acetyl-gamma-glutamyl-phosphate reductase	GCA_026134085.1	MCW7079039.1	A	TRUE	E	COG0002@1|root,arCOG00495@2157|Archaea,2XTC1@28890|Euryarchaeota,2N9EF@224756|Methanomicrobia	Catalyzes the NADPH-dependent reduction of N-acetyl-5- glutamyl phosphate to yield N-acetyl-L-glutamate 5-semialdehyde	unknown	ko00220,ko01100,ko01110,ko01130,ko01210,ko01230,map00220,map01100,map01110,map01130,map01210,map01230	1.2.1.38	JAOQIN010000036.1	9831	10910
MDF0594065.1	CO dehydrogenase/acetyl-CoA synthase complex subunit alpha	GCA_029167205.1	MDF0594065.1	A	FALSE	unknown		unknown	CODH			JARFPL010000042.1	14877	17315
MDF0594066.1	CO dehydrogenase/acetyl-CoA synthase complex subunit epsilon	GCA_029167205.1	MDF0594065.1	A	TRUE	C	COG1880@1|root,arCOG04408@2157|Archaea,2XWPE@28890|Euryarchaeota	Part of a complex that catalyzes the reversible cleavage of acetyl-CoA, allowing autotrophic growth from CO(2). The alpha- epsilon subcomponent functions as a carbon monoxide dehydrogenase. The precise role of the epsilon subunit is unclear	One carbon pool	ko00680,ko01120,ko01200,map00680,map01120,map01200		JARFPL010000042.1	17329	17874
MDF0594066.1	CO dehydrogenase/acetyl-CoA synthase complex subunit epsilon	GCA_029167205.1	MDF0594065.1	A	TRUE	C	COG1880@1|root,arCOG04408@2157|Archaea,2XWPE@28890|Euryarchaeota	Part of a complex that catalyzes the reversible cleavage of acetyl-CoA, allowing autotrophic growth from CO(2). The alpha- epsilon subcomponent functions as a carbon monoxide dehydrogenase. The precise role of the epsilon subunit is unclear	One carbon pool	ko00680,ko01120,ko01200,map00680,map01120,map01200		JARFPL010000042.1	17329	17874
MDF2955644.1	hypothetical protein	GCA_029259535.1	MDF2955645.1	A	TRUE	unknown		unknown	unknown			JAPHEF010000025.1	4071	4289
MDF2955645.1	CO dehydrogenase/acetyl-CoA synthase alpha subunit	GCA_029259535.1	MDF2955645.1	A	FALSE	unknown		unknown	CODH			JAPHEF010000025.1	4311	6839
MDF2956056.1	hypothetical protein	GCA_029259535.1	MDF2956057.1	A	TRUE	unknown		unknown	unknown			JAPHEF010000044.1	5913	6143
MDF2956057.1	CO dehydrogenase/acetyl-CoA synthase alpha subunit	GCA_029259535.1	MDF2956057.1	A	FALSE	unknown		unknown	CODH			JAPHEF010000044.1	6140	8683
MDF2955815.1	Radical SAM superfamily maturase	GCA_029259535.1	MDF2955822.1	A	TRUE	S	COG0535@1|root,arCOG00955@2157|Archaea,2XVWX@28890|Euryarchaeota,24653@183980|Archaeoglobi	Radical SAM domain protein	radical SAM protein			JAPHEF010000031.1	6708	7592
MDF2955646.1	hypothetical protein	GCA_029259535.1	MDF2955645.1	A	TRUE	unknown		unknown	unknown			JAPHEF010000025.1	6852	7316
MDF2955647.1	CO dehydrogenase/acetyl-CoA synthase beta subunit	GCA_029259535.1	MDF2955645.1	A	TRUE	C	COG1614@1|root,arCOG04360@2157|Archaea,2XU0D@28890|Euryarchaeota,2462N@183980|Archaeoglobi	Part of a complex that catalyzes the reversible cleavage of acetyl-CoA, allowing autotrophic growth from CO(2). The alpha- epsilon complex generates CO from CO(2), while the beta subunit (this protein) combines the CO with CoA and a methyl group to form acetyl-CoA. The methyl group, which is incorporated into acetyl- CoA, is transferred to the beta subunit by a corrinoid iron-sulfur protein (the …	One carbon pool	ko00680,ko01120,ko01200,map00680,map01120,map01200		JAPHEF010000025.1	7322	8779
MDF2955647.1	CO dehydrogenase/acetyl-CoA synthase beta subunit	GCA_029259535.1	MDF2955645.1	A	TRUE	C	COG1614@1|root,arCOG04360@2157|Archaea,2XU0D@28890|Euryarchaeota,2462N@183980|Archaeoglobi	Part of a complex that catalyzes the reversible cleavage of acetyl-CoA, allowing autotrophic growth from CO(2). The alpha- epsilon complex generates CO from CO(2), while the beta subunit (this protein) combines the CO with CoA and a methyl group to form acetyl-CoA. The methyl group, which is incorporated into acetyl- CoA, is transferred to the beta subunit by a corrinoid iron-sulfur protein (the …	One carbon pool	ko00680,ko01120,ko01200,map00680,map01120,map01200		JAPHEF010000025.1	7322	8779
MDF2955816.1	CO dehydrogenase/acetyl-CoA synthase gamma subunit	GCA_029259535.1	MDF2955822.1	A	TRUE	C	COG1456@1|root,arCOG01979@2157|Archaea,2XUSG@28890|Euryarchaeota,2N9BD@224756|Methanomicrobia	Part of a complex that catalyzes the reversible cleavage of acetyl-CoA, allowing	One carbon pool	ko00680,ko00720,ko01120,ko01200,map00680,map00720,map01120,map01200	2.1.1.245	JAPHEF010000031.1	7610	9034
MDF2955816.1	CO dehydrogenase/acetyl-CoA synthase gamma subunit	GCA_029259535.1	MDF2955822.1	A	TRUE	C	COG1456@1|root,arCOG01979@2157|Archaea,2XUSG@28890|Euryarchaeota,2N9BD@224756|Methanomicrobia	Part of a complex that catalyzes the reversible cleavage of acetyl-CoA, allowing	One carbon pool	ko00680,ko00720,ko01120,ko01200,map00680,map00720,map01120,map01200	2.1.1.245	JAPHEF010000031.1	7610	9034
MDF2956058.1	hypothetical protein	GCA_029259535.1	MDF2956057.1	A	TRUE	unknown		unknown	unknown			JAPHEF010000044.1	8686	9132
MDF2955648.1	hypothetical protein	GCA_029259535.1	MDF2955645.1	A	TRUE	unknown		unknown	unknown			JAPHEF010000025.1	8797	9324
MDF2955817.1	CO dehydrogenase/acetyl-CoA synthase delta subunit	GCA_029259535.1	MDF2955822.1	A	TRUE	C	COG2069@1|root,arCOG01980@2157|Archaea,2XTXS@28890|Euryarchaeota,245TW@183980|Archaeoglobi	Part of a complex that catalyzes the reversible cleavage of acetyl-CoA, allowing autotrophic growth from CO(2). Probably maintains the overall quaternary structure of the ACDS complex	One carbon pool	ko00680,ko00720,ko01120,ko01200,map00680,map00720,map01120,map01200	2.1.1.245	JAPHEF010000031.1	9031	10422
MDF2955817.1	CO dehydrogenase/acetyl-CoA synthase delta subunit	GCA_029259535.1	MDF2955822.1	A	TRUE	C	COG2069@1|root,arCOG01980@2157|Archaea,2XTXS@28890|Euryarchaeota,245TW@183980|Archaeoglobi	Part of a complex that catalyzes the reversible cleavage of acetyl-CoA, allowing autotrophic growth from CO(2). Probably maintains the overall quaternary structure of the ACDS complex	One carbon pool	ko00680,ko00720,ko01120,ko01200,map00680,map00720,map01120,map01200	2.1.1.245	JAPHEF010000031.1	9031	10422
MDF2956059.1	CO dehydrogenase/acetyl-CoA synthase beta subunit	GCA_029259535.1	MDF2956057.1	A	TRUE	C	COG1614@1|root,arCOG04360@2157|Archaea,2XU0D@28890|Euryarchaeota,23Q7P@183939|Methanococci	Part of a complex that catalyzes the reversible cleavage of acetyl-CoA, allowing autotrophic growth from CO(2). The alpha- epsilon complex generates CO from CO(2), while the beta subunit (this protein) combines the CO with CoA and a methyl group to form acetyl-CoA. The methyl group, which is incorporated into acetyl- CoA, is transferred to the beta subunit by a corrinoid iron-sulfur protein (the …	One carbon pool	ko00680,ko01120,ko01200,map00680,map01120,map01200	1.2.7.4	JAPHEF010000044.1	9129	10520
MDF2956059.1	CO dehydrogenase/acetyl-CoA synthase beta subunit	GCA_029259535.1	MDF2956057.1	A	TRUE	C	COG1614@1|root,arCOG04360@2157|Archaea,2XU0D@28890|Euryarchaeota,23Q7P@183939|Methanococci	Part of a complex that catalyzes the reversible cleavage of acetyl-CoA, allowing autotrophic growth from CO(2). The alpha- epsilon complex generates CO from CO(2), while the beta subunit (this protein) combines the CO with CoA and a methyl group to form acetyl-CoA. The methyl group, which is incorporated into acetyl- CoA, is transferred to the beta subunit by a corrinoid iron-sulfur protein (the …	One carbon pool	ko00680,ko01120,ko01200,map00680,map01120,map01200	1.2.7.4	JAPHEF010000044.1	9129	10520
MDF2955649.1	Acetyl-CoA acetyltransferase	GCA_029259535.1	MDF2955645.1	A	TRUE	I	COG0183@1|root,arCOG01278@2157|Archaea,2XT38@28890|Euryarchaeota,245TY@183980|Archaeoglobi	Thiolase, C-terminal domain	One carbon pool	ko00071,ko00072,ko00280,ko00281,ko00310,ko00362,ko00380,ko00592,ko00620,ko00630,ko00640,ko00642,ko00650,ko00720,ko00900,ko01100,ko01110,ko01120,ko01130,ko01200,ko01212,ko02020,map00071,map00072,map00280,map00281,map00310,map00362,map00380,map00592,map00620,map00630,map00640,map00642,map00650,map00720,map00900,map01100,map01110,map01120,map01130,map01200,map01212,map02020	2.3.1.16,2.3.1.9	JAPHEF010000025.1	9411	10622
MDF2955649.1	Acetyl-CoA acetyltransferase	GCA_029259535.1	MDF2955645.1	A	TRUE	I	COG0183@1|root,arCOG01278@2157|Archaea,2XT38@28890|Euryarchaeota,245TY@183980|Archaeoglobi	Thiolase, C-terminal domain	One carbon pool	ko00071,ko00072,ko00280,ko00281,ko00310,ko00362,ko00380,ko00592,ko00620,ko00630,ko00640,ko00642,ko00650,ko00720,ko00900,ko01100,ko01110,ko01120,ko01130,ko01200,ko01212,ko02020,map00071,map00072,map00280,map00281,map00310,map00362,map00380,map00592,map00620,map00630,map00640,map00642,map00650,map00720,map00900,map01100,map01110,map01120,map01130,map01200,map01212,map02020	2.3.1.16,2.3.1.9	JAPHEF010000025.1	9411	10622
MDF2955818.1	hypothetical protein	GCA_029259535.1	MDF2955822.1	A	TRUE	unknown		unknown	unknown			JAPHEF010000031.1	10436	10552
MDF2955819.1	CO dehydrogenase nickel-insertion accessory protein CooC1	GCA_029259535.1	MDF2955822.1	A	TRUE	D	COG3640@1|root,arCOG00587@2157|Archaea,2XT61@28890|Euryarchaeota,23QPT@183939|Methanococci	PFAM Cobyrinic acid a,c-diamide synthase	CooC			JAPHEF010000031.1	10564	11316
MDF2955650.1	OB-fold protein	GCA_029259535.1	MDF2955645.1	A	TRUE	V	COG1545@1|root,arCOG01285@2157|Archaea,2XYBD@28890|Euryarchaeota	nucleic-acid-binding protein containing a Zn-ribbon	unknown			JAPHEF010000025.1	10640	11047
MDF2955651.1	Omega-amidase YafV/Nit2	GCA_029259535.1	MDF2955645.1	A	TRUE	S	COG0388@1|root,arCOG00062@2157|Archaea,2XVR0@28890|Euryarchaeota,245Z8@183980|Archaeoglobi	Carbon-nitrogen hydrolase	unknown	ko00250,map00250	3.5.1.3	JAPHEF010000025.1	11199	12014
MDF2955820.1	CO dehydrogenase/acetyl-CoA synthase beta subunit	GCA_029259535.1	MDF2955822.1	A	TRUE	C	COG1614@1|root,arCOG04360@2157|Archaea,2XU0D@28890|Euryarchaeota,2462N@183980|Archaeoglobi	Part of a complex that catalyzes the reversible cleavage of acetyl-CoA, allowing autotrophic growth from CO(2). The alpha- epsilon complex generates CO from CO(2), while the beta subunit (this protein) combines the CO with CoA and a methyl group to form acetyl-CoA. The methyl group, which is incorporated into acetyl- CoA, is transferred to the beta subunit by a corrinoid iron-sulfur protein (the …	One carbon pool	ko00680,ko01120,ko01200,map00680,map01120,map01200		JAPHEF010000031.1	11337	12833
MDF2955820.1	CO dehydrogenase/acetyl-CoA synthase beta subunit	GCA_029259535.1	MDF2955822.1	A	TRUE	C	COG1614@1|root,arCOG04360@2157|Archaea,2XU0D@28890|Euryarchaeota,2462N@183980|Archaeoglobi	Part of a complex that catalyzes the reversible cleavage of acetyl-CoA, allowing autotrophic growth from CO(2). The alpha- epsilon complex generates CO from CO(2), while the beta subunit (this protein) combines the CO with CoA and a methyl group to form acetyl-CoA. The methyl group, which is incorporated into acetyl- CoA, is transferred to the beta subunit by a corrinoid iron-sulfur protein (the …	One carbon pool	ko00680,ko01120,ko01200,map00680,map01120,map01200		JAPHEF010000031.1	11337	12833
MDF2955821.1	CO dehydrogenase/acetyl-CoA synthase epsilon subunit	GCA_029259535.1	MDF2955822.1	A	TRUE	C	COG1880@1|root,arCOG04408@2157|Archaea,2XWPE@28890|Euryarchaeota,245XY@183980|Archaeoglobi	Part of a complex that catalyzes the reversible cleavage of acetyl-CoA, allowing autotrophic growth from CO(2). The alpha- epsilon subcomponent functions as a carbon monoxide dehydrogenase. The precise role of the epsilon subunit is unclear	One carbon pool	ko00680,ko01120,ko01200,map00680,map01120,map01200		JAPHEF010000031.1	12847	13386
MDF2955821.1	CO dehydrogenase/acetyl-CoA synthase epsilon subunit	GCA_029259535.1	MDF2955822.1	A	TRUE	C	COG1880@1|root,arCOG04408@2157|Archaea,2XWPE@28890|Euryarchaeota,245XY@183980|Archaeoglobi	Part of a complex that catalyzes the reversible cleavage of acetyl-CoA, allowing autotrophic growth from CO(2). The alpha- epsilon subcomponent functions as a carbon monoxide dehydrogenase. The precise role of the epsilon subunit is unclear	One carbon pool	ko00680,ko01120,ko01200,map00680,map01120,map01200		JAPHEF010000031.1	12847	13386
MDF2955822.1	CO dehydrogenase/acetyl-CoA synthase alpha subunit	GCA_029259535.1	MDF2955822.1	A	FALSE	unknown		unknown	CODH			JAPHEF010000031.1	13409	15838
MDF2955823.1	Cobyric acid synthase	GCA_029259535.1	MDF2955822.1	A	TRUE	H	COG1492@1|root,COG1492@2|Bacteria,1TP5E@1239|Firmicutes,248XW@186801|Clostridia,267W1@186813|unclassified Clostridiales	Catalyzes amidations at positions B, D, E, and G on adenosylcobyrinic A,C-diamide. NH(2) groups are provided by glutamine, and one molecule of ATP is hydrogenolyzed for each amidation	unknown	ko00860,ko01100,map00860,map01100	6.3.5.10	JAPHEF010000031.1	15891	17381
MDF2955033.1	CO dehydrogenase/acetyl-CoA synthase gamma subunit	GCA_029259535.1	MDF2955038.1	A	TRUE	C	COG1456@1|root,arCOG01979@2157|Archaea,2XUSG@28890|Euryarchaeota,2N9BD@224756|Methanomicrobia	Part of a complex that catalyzes the reversible cleavage of acetyl-CoA, allowing	One carbon pool	ko00680,ko00720,ko01120,ko01200,map00680,map00720,map01120,map01200	2.1.1.245	JAPHEF010000009.1	29405	30835
MDF2955033.1	CO dehydrogenase/acetyl-CoA synthase gamma subunit	GCA_029259535.1	MDF2955038.1	A	TRUE	C	COG1456@1|root,arCOG01979@2157|Archaea,2XUSG@28890|Euryarchaeota,2N9BD@224756|Methanomicrobia	Part of a complex that catalyzes the reversible cleavage of acetyl-CoA, allowing	One carbon pool	ko00680,ko00720,ko01120,ko01200,map00680,map00720,map01120,map01200	2.1.1.245	JAPHEF010000009.1	29405	30835
MDF2955034.1	CO dehydrogenase/acetyl-CoA synthase delta subunit	GCA_029259535.1	MDF2955038.1	A	TRUE	C	COG2069@1|root,arCOG01980@2157|Archaea,2XTXS@28890|Euryarchaeota,245TW@183980|Archaeoglobi	Part of a complex that catalyzes the reversible cleavage of acetyl-CoA, allowing autotrophic growth from CO(2). Probably maintains the overall quaternary structure of the ACDS complex	One carbon pool	ko00680,ko00720,ko01120,ko01200,map00680,map00720,map01120,map01200	2.1.1.245	JAPHEF010000009.1	30846	32357
MDF2955034.1	CO dehydrogenase/acetyl-CoA synthase delta subunit	GCA_029259535.1	MDF2955038.1	A	TRUE	C	COG2069@1|root,arCOG01980@2157|Archaea,2XTXS@28890|Euryarchaeota,245TW@183980|Archaeoglobi	Part of a complex that catalyzes the reversible cleavage of acetyl-CoA, allowing autotrophic growth from CO(2). Probably maintains the overall quaternary structure of the ACDS complex	One carbon pool	ko00680,ko00720,ko01120,ko01200,map00680,map00720,map01120,map01200	2.1.1.245	JAPHEF010000009.1	30846	32357
MDF2955035.1	hypothetical protein	GCA_029259535.1	MDF2955038.1	A	TRUE	unknown		unknown	unknown			JAPHEF010000009.1	32426	32584
MDF2955036.1	CO dehydrogenase/acetyl-CoA synthase beta subunit	GCA_029259535.1	MDF2955038.1	A	TRUE	C	COG1614@1|root,arCOG04360@2157|Archaea,2XU0D@28890|Euryarchaeota,2462N@183980|Archaeoglobi	Part of a complex that catalyzes the reversible cleavage of acetyl-CoA, allowing autotrophic growth from CO(2). The alpha- epsilon complex generates CO from CO(2), while the beta subunit (this protein) combines the CO with CoA and a methyl group to form acetyl-CoA. The methyl group, which is incorporated into acetyl- CoA, is transferred to the beta subunit by a corrinoid iron-sulfur protein (the …	One carbon pool	ko00680,ko01120,ko01200,map00680,map01120,map01200		JAPHEF010000009.1	32588	34093
MDF2955036.1	CO dehydrogenase/acetyl-CoA synthase beta subunit	GCA_029259535.1	MDF2955038.1	A	TRUE	C	COG1614@1|root,arCOG04360@2157|Archaea,2XU0D@28890|Euryarchaeota,2462N@183980|Archaeoglobi	Part of a complex that catalyzes the reversible cleavage of acetyl-CoA, allowing autotrophic growth from CO(2). The alpha- epsilon complex generates CO from CO(2), while the beta subunit (this protein) combines the CO with CoA and a methyl group to form acetyl-CoA. The methyl group, which is incorporated into acetyl- CoA, is transferred to the beta subunit by a corrinoid iron-sulfur protein (the …	One carbon pool	ko00680,ko01120,ko01200,map00680,map01120,map01200		JAPHEF010000009.1	32588	34093
MDF2955037.1	CO dehydrogenase/acetyl-CoA synthase epsilon subunit	GCA_029259535.1	MDF2955038.1	A	TRUE	C	COG1880@1|root,arCOG04408@2157|Archaea,2XWPE@28890|Euryarchaeota	Part of a complex that catalyzes the reversible cleavage of acetyl-CoA, allowing autotrophic growth from CO(2). The alpha- epsilon subcomponent functions as a carbon monoxide dehydrogenase. The precise role of the epsilon subunit is unclear	One carbon pool	ko00680,ko01120,ko01200,map00680,map01120,map01200		JAPHEF010000009.1	34107	34637
MDF2955037.1	CO dehydrogenase/acetyl-CoA synthase epsilon subunit	GCA_029259535.1	MDF2955038.1	A	TRUE	C	COG1880@1|root,arCOG04408@2157|Archaea,2XWPE@28890|Euryarchaeota	Part of a complex that catalyzes the reversible cleavage of acetyl-CoA, allowing autotrophic growth from CO(2). The alpha- epsilon subcomponent functions as a carbon monoxide dehydrogenase. The precise role of the epsilon subunit is unclear	One carbon pool	ko00680,ko01120,ko01200,map00680,map01120,map01200		JAPHEF010000009.1	34107	34637
MDF2955038.1	CO dehydrogenase/acetyl-CoA synthase alpha subunit	GCA_029259535.1	MDF2955038.1	A	FALSE	unknown		unknown	CODH			JAPHEF010000009.1	34647	37058
MDF2955039.1	2Fe-2S and 4Fe-4S clusters-containing protein	GCA_029259535.1	MDF2955038.1	A	TRUE	C	COG0633@1|root,COG3894@1|root,arCOG02035@2157|Archaea,arCOG02842@2157|Archaea,2XVBE@28890|Euryarchaeota,246NQ@183980|Archaeoglobi	Domain of unknown function (DUF4445)	unknown			JAPHEF010000009.1	37128	39122
MDF2955040.1	Methanogenic corrinoid protein MtbC1	GCA_029259535.1	MDF2955038.1	A	TRUE	S	COG5012@1|root,COG5012@2|Bacteria,1V1P0@1239|Firmicutes,24G08@186801|Clostridia,36IFT@31979|Clostridiaceae	PFAM Methionine synthase, B12-binding module, cap domain protein	unknown			JAPHEF010000009.1	39168	39878
MDF2955041.1	Carbamoyl dehydratase HypE	GCA_029259535.1	MDF2955038.1	A	TRUE	O	COG0309@1|root,arCOG00636@2157|Archaea,2XTAH@28890|Euryarchaeota,241W7@183967|Thermoplasmata	AIR synthase related protein, C-terminal domain	unknown			JAPHEF010000009.1	40009	41061
MDF2955042.1	hypothetical protein	GCA_029259535.1	MDF2955038.1	A	TRUE	M	COG1361@1|root,arCOG04400@2157|Archaea,2XZN3@28890|Euryarchaeota,2N9X5@224756|Methanomicrobia	COG1361 S-layer domain	unknown			JAPHEF010000009.1	41058	42068
MDF2957648.1	Translation initiation factor IF-2	GCA_029259545.1	MDF2957656.1	A	TRUE	J	COG0532@1|root,arCOG01560@2157|Archaea,2XU09@28890|Euryarchaeota,2N96H@224756|Methanomicrobia	Function in general translation initiation by promoting the binding of the formylmethionine-tRNA to ribosomes. Seems to function along with eIF-2	unknown	ko03013,map03013		JAPHEE010000023.1	8515	10311
MDF2957318.1	Radical SAM superfamily maturase	GCA_029259545.1	MDF2957325.1	A	TRUE	S	COG0535@1|root,arCOG00955@2157|Archaea,2XVWX@28890|Euryarchaeota,24653@183980|Archaeoglobi	Radical SAM domain protein	radical SAM protein			JAPHEE010000014.1	8526	9407
MDF2957319.1	CO dehydrogenase/acetyl-CoA synthase gamma subunit	GCA_029259545.1	MDF2957325.1	A	TRUE	C	COG1456@1|root,arCOG01979@2157|Archaea,2XUSG@28890|Euryarchaeota,2N9BD@224756|Methanomicrobia	Part of a complex that catalyzes the reversible cleavage of acetyl-CoA, allowing	One carbon pool	ko00680,ko00720,ko01120,ko01200,map00680,map00720,map01120,map01200	2.1.1.245	JAPHEE010000014.1	9435	10838
MDF2957319.1	CO dehydrogenase/acetyl-CoA synthase gamma subunit	GCA_029259545.1	MDF2957325.1	A	TRUE	C	COG1456@1|root,arCOG01979@2157|Archaea,2XUSG@28890|Euryarchaeota,2N9BD@224756|Methanomicrobia	Part of a complex that catalyzes the reversible cleavage of acetyl-CoA, allowing	One carbon pool	ko00680,ko00720,ko01120,ko01200,map00680,map00720,map01120,map01200	2.1.1.245	JAPHEE010000014.1	9435	10838
MDF2957649.1	Chorismate mutase	GCA_029259545.1	MDF2957656.1	A	TRUE	E	COG1605@1|root,arCOG02098@2157|Archaea,2Y6AQ@28890|Euryarchaeota,2N9YR@224756|Methanomicrobia	chorismate mutase	unknown	ko00400,ko01100,ko01110,ko01130,ko01230,map00400,map01100,map01110,map01130,map01230	5.4.99.5	JAPHEE010000023.1	10289	10624
MDF2957650.1	Archaeal shikimate kinase	GCA_029259545.1	MDF2957656.1	A	TRUE	E	COG1685@1|root,arCOG01025@2157|Archaea,2XUI2@28890|Euryarchaeota,2N96J@224756|Methanomicrobia	shikimate kinase activity	unknown	ko00400,ko01100,ko01110,ko01130,ko01230,map00400,map01100,map01110,map01130,map01230	2.7.1.71	JAPHEE010000023.1	10635	11567
MDF2957320.1	CO dehydrogenase/acetyl-CoA synthase delta subunit	GCA_029259545.1	MDF2957325.1	A	TRUE	C	COG2069@1|root,arCOG01980@2157|Archaea,2XTXS@28890|Euryarchaeota,245TW@183980|Archaeoglobi	Part of a complex that catalyzes the reversible cleavage of acetyl-CoA, allowing autotrophic growth from CO(2). Probably maintains the overall quaternary structure of the ACDS complex	One carbon pool	ko00680,ko00720,ko01120,ko01200,map00680,map00720,map01120,map01200	2.1.1.245	JAPHEE010000014.1	10868	12253
MDF2957320.1	CO dehydrogenase/acetyl-CoA synthase delta subunit	GCA_029259545.1	MDF2957325.1	A	TRUE	C	COG2069@1|root,arCOG01980@2157|Archaea,2XTXS@28890|Euryarchaeota,245TW@183980|Archaeoglobi	Part of a complex that catalyzes the reversible cleavage of acetyl-CoA, allowing autotrophic growth from CO(2). Probably maintains the overall quaternary structure of the ACDS complex	One carbon pool	ko00680,ko00720,ko01120,ko01200,map00680,map00720,map01120,map01200	2.1.1.245	JAPHEE010000014.1	10868	12253
MDF2957651.1	CO dehydrogenase/acetyl-CoA synthase gamma subunit	GCA_029259545.1	MDF2957656.1	A	TRUE	C	COG1456@1|root,arCOG01979@2157|Archaea,2XUSG@28890|Euryarchaeota,2N9BD@224756|Methanomicrobia	Part of a complex that catalyzes the reversible cleavage of acetyl-CoA, allowing	One carbon pool	ko00680,ko00720,ko01120,ko01200,map00680,map00720,map01120,map01200	2.1.1.245	JAPHEE010000023.1	11700	13130
MDF2957651.1	CO dehydrogenase/acetyl-CoA synthase gamma subunit	GCA_029259545.1	MDF2957656.1	A	TRUE	C	COG1456@1|root,arCOG01979@2157|Archaea,2XUSG@28890|Euryarchaeota,2N9BD@224756|Methanomicrobia	Part of a complex that catalyzes the reversible cleavage of acetyl-CoA, allowing	One carbon pool	ko00680,ko00720,ko01120,ko01200,map00680,map00720,map01120,map01200	2.1.1.245	JAPHEE010000023.1	11700	13130
MDF2957321.1	hypothetical protein	GCA_029259545.1	MDF2957325.1	A	TRUE	unknown		unknown	unknown			JAPHEE010000014.1	12454	12582
MDF2957322.1	CO dehydrogenase nickel-insertion accessory protein CooC1	GCA_029259545.1	MDF2957325.1	A	TRUE	D	COG3640@1|root,arCOG00587@2157|Archaea,2XT61@28890|Euryarchaeota	PFAM Cobyrinic acid a,c-diamide synthase	CooC			JAPHEE010000014.1	12593	13345
MDF2957652.1	CO dehydrogenase/acetyl-CoA synthase delta subunit	GCA_029259545.1	MDF2957656.1	A	TRUE	C	COG2069@1|root,arCOG01980@2157|Archaea,2XTXS@28890|Euryarchaeota,245TW@183980|Archaeoglobi	Part of a complex that catalyzes the reversible cleavage of acetyl-CoA, allowing autotrophic growth from CO(2). Probably maintains the overall quaternary structure of the ACDS complex	One carbon pool	ko00680,ko00720,ko01120,ko01200,map00680,map00720,map01120,map01200	2.1.1.245	JAPHEE010000023.1	13141	14640
MDF2957652.1	CO dehydrogenase/acetyl-CoA synthase delta subunit	GCA_029259545.1	MDF2957656.1	A	TRUE	C	COG2069@1|root,arCOG01980@2157|Archaea,2XTXS@28890|Euryarchaeota,245TW@183980|Archaeoglobi	Part of a complex that catalyzes the reversible cleavage of acetyl-CoA, allowing autotrophic growth from CO(2). Probably maintains the overall quaternary structure of the ACDS complex	One carbon pool	ko00680,ko00720,ko01120,ko01200,map00680,map00720,map01120,map01200	2.1.1.245	JAPHEE010000023.1	13141	14640
MDF2957323.1	CO dehydrogenase/acetyl-CoA synthase beta subunit	GCA_029259545.1	MDF2957325.1	A	TRUE	C	COG1614@1|root,arCOG04360@2157|Archaea,2XU0D@28890|Euryarchaeota,2462N@183980|Archaeoglobi	Part of a complex that catalyzes the reversible cleavage of acetyl-CoA, allowing autotrophic growth from CO(2). The alpha- epsilon complex generates CO from CO(2), while the beta subunit (this protein) combines the CO with CoA and a methyl group to form acetyl-CoA. The methyl group, which is incorporated into acetyl- CoA, is transferred to the beta subunit by a corrinoid iron-sulfur protein (the …	One carbon pool	ko00680,ko01120,ko01200,map00680,map01120,map01200		JAPHEE010000014.1	13370	14893
MDF2957323.1	CO dehydrogenase/acetyl-CoA synthase beta subunit	GCA_029259545.1	MDF2957325.1	A	TRUE	C	COG1614@1|root,arCOG04360@2157|Archaea,2XU0D@28890|Euryarchaeota,2462N@183980|Archaeoglobi	Part of a complex that catalyzes the reversible cleavage of acetyl-CoA, allowing autotrophic growth from CO(2). The alpha- epsilon complex generates CO from CO(2), while the beta subunit (this protein) combines the CO with CoA and a methyl group to form acetyl-CoA. The methyl group, which is incorporated into acetyl- CoA, is transferred to the beta subunit by a corrinoid iron-sulfur protein (the …	One carbon pool	ko00680,ko01120,ko01200,map00680,map01120,map01200		JAPHEE010000014.1	13370	14893
MDF2957653.1	hypothetical protein	GCA_029259545.1	MDF2957656.1	A	TRUE	unknown		unknown	unknown			JAPHEE010000023.1	14687	14863
MDF2957654.1	CO dehydrogenase/acetyl-CoA synthase beta subunit	GCA_029259545.1	MDF2957656.1	A	TRUE	C	COG1614@1|root,arCOG04360@2157|Archaea,2XU0D@28890|Euryarchaeota,2462N@183980|Archaeoglobi	Part of a complex that catalyzes the reversible cleavage of acetyl-CoA, allowing autotrophic growth from CO(2). The alpha- epsilon complex generates CO from CO(2), while the beta subunit (this protein) combines the CO with CoA and a methyl group to form acetyl-CoA. The methyl group, which is incorporated into acetyl- CoA, is transferred to the beta subunit by a corrinoid iron-sulfur protein (the …	One carbon pool	ko00680,ko01120,ko01200,map00680,map01120,map01200		JAPHEE010000023.1	14865	16370
MDF2957654.1	CO dehydrogenase/acetyl-CoA synthase beta subunit	GCA_029259545.1	MDF2957656.1	A	TRUE	C	COG1614@1|root,arCOG04360@2157|Archaea,2XU0D@28890|Euryarchaeota,2462N@183980|Archaeoglobi	Part of a complex that catalyzes the reversible cleavage of acetyl-CoA, allowing autotrophic growth from CO(2). The alpha- epsilon complex generates CO from CO(2), while the beta subunit (this protein) combines the CO with CoA and a methyl group to form acetyl-CoA. The methyl group, which is incorporated into acetyl- CoA, is transferred to the beta subunit by a corrinoid iron-sulfur protein (the …	One carbon pool	ko00680,ko01120,ko01200,map00680,map01120,map01200		JAPHEE010000023.1	14865	16370
MDF2957324.1	CO dehydrogenase/acetyl-CoA synthase epsilon subunit	GCA_029259545.1	MDF2957325.1	A	TRUE	C	COG1880@1|root,arCOG04408@2157|Archaea,2XWPE@28890|Euryarchaeota,245XY@183980|Archaeoglobi	Part of a complex that catalyzes the reversible cleavage of acetyl-CoA, allowing autotrophic growth from CO(2). The alpha- epsilon subcomponent functions as a carbon monoxide dehydrogenase. The precise role of the epsilon subunit is unclear	One carbon pool	ko00680,ko01120,ko01200,map00680,map01120,map01200		JAPHEE010000014.1	14898	15437
MDF2957324.1	CO dehydrogenase/acetyl-CoA synthase epsilon subunit	GCA_029259545.1	MDF2957325.1	A	TRUE	C	COG1880@1|root,arCOG04408@2157|Archaea,2XWPE@28890|Euryarchaeota,245XY@183980|Archaeoglobi	Part of a complex that catalyzes the reversible cleavage of acetyl-CoA, allowing autotrophic growth from CO(2). The alpha- epsilon subcomponent functions as a carbon monoxide dehydrogenase. The precise role of the epsilon subunit is unclear	One carbon pool	ko00680,ko01120,ko01200,map00680,map01120,map01200		JAPHEE010000014.1	14898	15437
MDF2957325.1	CO dehydrogenase/acetyl-CoA synthase alpha subunit	GCA_029259545.1	MDF2957325.1	A	FALSE	unknown		unknown	CODH			JAPHEE010000014.1	15456	17837
MDF2957655.1	CO dehydrogenase/acetyl-CoA synthase epsilon subunit	GCA_029259545.1	MDF2957656.1	A	TRUE	C	COG1880@1|root,arCOG04408@2157|Archaea,2XWPE@28890|Euryarchaeota	Part of a complex that catalyzes the reversible cleavage of acetyl-CoA, allowing autotrophic growth from CO(2). The alpha- epsilon subcomponent functions as a carbon monoxide dehydrogenase. The precise role of the epsilon subunit is unclear	One carbon pool	ko00680,ko01120,ko01200,map00680,map01120,map01200		JAPHEE010000023.1	16381	16914
MDF2957655.1	CO dehydrogenase/acetyl-CoA synthase epsilon subunit	GCA_029259545.1	MDF2957656.1	A	TRUE	C	COG1880@1|root,arCOG04408@2157|Archaea,2XWPE@28890|Euryarchaeota	Part of a complex that catalyzes the reversible cleavage of acetyl-CoA, allowing autotrophic growth from CO(2). The alpha- epsilon subcomponent functions as a carbon monoxide dehydrogenase. The precise role of the epsilon subunit is unclear	One carbon pool	ko00680,ko01120,ko01200,map00680,map01120,map01200		JAPHEE010000023.1	16381	16914
MDF2957656.1	CO dehydrogenase/acetyl-CoA synthase alpha subunit	GCA_029259545.1	MDF2957656.1	A	FALSE	unknown		unknown	CODH			JAPHEE010000023.1	16933	19332
MDF2957326.1	Acyl-CoA dehydrogenase related to the alkylation response protein AidB	GCA_029259545.1	MDF2957325.1	A	TRUE	I	COG1960@1|root,COG1960@2|Bacteria,1TP57@1239|Firmicutes,4HA2A@91061|Bacilli,23IYZ@182709|Oceanobacillus	Acyl-CoA dehydrogenase, N-terminal domain	unknown			JAPHEE010000014.1	18097	18381
MDF2957327.1	Cobyric acid synthase	GCA_029259545.1	MDF2957325.1	A	TRUE	H	COG1492@1|root,COG1492@2|Bacteria,1TP5E@1239|Firmicutes,248XW@186801|Clostridia,267W1@186813|unclassified Clostridiales	Catalyzes amidations at positions B, D, E, and G on adenosylcobyrinic A,C-diamide. NH(2) groups are provided by glutamine, and one molecule of ATP is hydrogenolyzed for each amidation	unknown	ko00860,ko01100,map00860,map01100	6.3.5.10	JAPHEE010000014.1	18394	19890
MDF2957657.1	putative 2Fe-2S and 4Fe-4S clusters-containing protein	GCA_029259545.1	MDF2957656.1	A	TRUE	C	COG0633@1|root,COG3894@1|root,arCOG02035@2157|Archaea,arCOG02842@2157|Archaea,2XVBE@28890|Euryarchaeota,246NQ@183980|Archaeoglobi	Domain of unknown function (DUF4445)	unknown			JAPHEE010000023.1	19415	21409
MDF2957328.1	Ribosomal protein L24	GCA_029259545.1	MDF2957325.1	A	TRUE	J	COG0198@1|root,arCOG04094@2157|Archaea,2XQQB@28889|Crenarchaeota	Located at the polypeptide exit tunnel on the outside of the subunit	unknown	ko03010,map03010		JAPHEE010000014.1	20057	20413
MDF2957329.1	Ribosomal protein L14	GCA_029259545.1	MDF2957325.1	A	TRUE	J	COG0093@1|root,arCOG04095@2157|Archaea,2XWM6@28890|Euryarchaeota,2467B@183980|Archaeoglobi	Binds to 23S rRNA. Forms part of two intersubunit bridges in the 70S ribosome	unknown	ko03010,map03010		JAPHEE010000014.1	20433	20855
MDF2957658.1	Methanogenic corrinoid protein MtbC1	GCA_029259545.1	MDF2957656.1	A	TRUE	S	COG5012@1|root,COG5012@2|Bacteria,2JBHI@203691|Spirochaetes	Dimethylamine corrinoid protein	unknown			JAPHEE010000023.1	21450	22178
MDF2957659.1	Carbamoyl dehydratase HypE	GCA_029259545.1	MDF2957656.1	A	TRUE	O	COG0309@1|root,arCOG00636@2157|Archaea,2XTAH@28890|Euryarchaeota,241W7@183967|Thermoplasmata	AIR synthase related protein, C-terminal domain	unknown			JAPHEE010000023.1	22440	23495
MDF2957660.1	S-layer protein	GCA_029259545.1	MDF2957656.1	A	TRUE	unknown		unknown	unknown			JAPHEE010000023.1	23492	24517
MDF2957661.1	DNA-binding response regulator	GCA_029259545.1	MDF2957656.1	A	TRUE	T	COG2203@1|root,COG3437@1|root,COG3452@1|root,COG5000@1|root,COG5002@1|root,COG2203@2|Bacteria,COG3437@2|Bacteria,COG3452@2|Bacteria,COG5000@2|Bacteria,COG5002@2|Bacteria,1FZYQ@1117|Cyanobacteria,3VIKA@52604|Pleurocapsales	PFAM Histidine kinase-, DNA gyrase B-, and HSP90-like ATPase	unknown			JAPHEE010000023.1	24625	26667
MDF2956575.1	hypothetical protein	GCA_029259545.1	MDF2956576.1	A	TRUE	unknown		unknown	unknown			JAPHEE010000002.1	50492	50746
MDF2956576.1	CO dehydrogenase/acetyl-CoA synthase alpha subunit	GCA_029259545.1	MDF2956576.1	A	FALSE	unknown		unknown	CODH			JAPHEE010000002.1	50768	53296
MDF2956577.1	hypothetical protein	GCA_029259545.1	MDF2956576.1	A	TRUE	unknown		unknown	unknown			JAPHEE010000002.1	53301	53771
MDF2956578.1	CO dehydrogenase/acetyl-CoA synthase beta subunit	GCA_029259545.1	MDF2956576.1	A	TRUE	C	COG1614@1|root,arCOG04360@2157|Archaea,2XU0D@28890|Euryarchaeota,2462N@183980|Archaeoglobi	Part of a complex that catalyzes the reversible cleavage of acetyl-CoA, allowing autotrophic growth from CO(2). The alpha- epsilon complex generates CO from CO(2), while the beta subunit (this protein) combines the CO with CoA and a methyl group to form acetyl-CoA. The methyl group, which is incorporated into acetyl- CoA, is transferred to the beta subunit by a corrinoid iron-sulfur protein (the …	One carbon pool	ko00680,ko01120,ko01200,map00680,map01120,map01200		JAPHEE010000002.1	53777	55243
MDF2956578.1	CO dehydrogenase/acetyl-CoA synthase beta subunit	GCA_029259545.1	MDF2956576.1	A	TRUE	C	COG1614@1|root,arCOG04360@2157|Archaea,2XU0D@28890|Euryarchaeota,2462N@183980|Archaeoglobi	Part of a complex that catalyzes the reversible cleavage of acetyl-CoA, allowing autotrophic growth from CO(2). The alpha- epsilon complex generates CO from CO(2), while the beta subunit (this protein) combines the CO with CoA and a methyl group to form acetyl-CoA. The methyl group, which is incorporated into acetyl- CoA, is transferred to the beta subunit by a corrinoid iron-sulfur protein (the …	One carbon pool	ko00680,ko01120,ko01200,map00680,map01120,map01200		JAPHEE010000002.1	53777	55243
MDF2956579.1	hypothetical protein	GCA_029259545.1	MDF2956576.1	A	TRUE	unknown		unknown	unknown			JAPHEE010000002.1	55261	55788
MDF2956580.1	Acetyl-CoA acetyltransferase	GCA_029259545.1	MDF2956576.1	A	TRUE	I	COG0183@1|root,arCOG01278@2157|Archaea,2XT38@28890|Euryarchaeota,245TY@183980|Archaeoglobi	Thiolase, C-terminal domain	One carbon pool	ko00071,ko00072,ko00280,ko00281,ko00310,ko00362,ko00380,ko00592,ko00620,ko00630,ko00640,ko00642,ko00650,ko00720,ko00900,ko01100,ko01110,ko01120,ko01130,ko01200,ko01212,ko02020,map00071,map00072,map00280,map00281,map00310,map00362,map00380,map00592,map00620,map00630,map00640,map00642,map00650,map00720,map00900,map01100,map01110,map01120,map01130,map01200,map01212,map02020	2.3.1.16,2.3.1.9	JAPHEE010000002.1	55867	57129
MDF2956580.1	Acetyl-CoA acetyltransferase	GCA_029259545.1	MDF2956576.1	A	TRUE	I	COG0183@1|root,arCOG01278@2157|Archaea,2XT38@28890|Euryarchaeota,245TY@183980|Archaeoglobi	Thiolase, C-terminal domain	One carbon pool	ko00071,ko00072,ko00280,ko00281,ko00310,ko00362,ko00380,ko00592,ko00620,ko00630,ko00640,ko00642,ko00650,ko00720,ko00900,ko01100,ko01110,ko01120,ko01130,ko01200,ko01212,ko02020,map00071,map00072,map00280,map00281,map00310,map00362,map00380,map00592,map00620,map00630,map00640,map00642,map00650,map00720,map00900,map01100,map01110,map01120,map01130,map01200,map01212,map02020	2.3.1.16,2.3.1.9	JAPHEE010000002.1	55867	57129
MDF2956581.1	putative OB-fold protein	GCA_029259545.1	MDF2956576.1	A	TRUE	V	COG1545@1|root,arCOG01285@2157|Archaea,2XYBD@28890|Euryarchaeota	nucleic-acid-binding protein containing a Zn-ribbon	unknown			JAPHEE010000002.1	57147	57554
MDF2956582.1	hypothetical protein	GCA_029259545.1	MDF2956576.1	A	TRUE	L	COG0863@1|root,arCOG00115@2157|Archaea,2Y6KV@28890|Euryarchaeota,244UT@183968|Thermococci	DNA methylase	unknown		2.1.1.113,2.1.1.72	JAPHEE010000002.1	57586	58224
MDF2956583.1	hypothetical protein	GCA_029259545.1	MDF2956576.1	A	TRUE	unknown	arCOG07157@1|root,arCOG07157@2157|Archaea	unknown	unknown			JAPHEE010000002.1	58308	59318
MEX2704299.1	acetyl-CoA decarbonylase/synthase complex subunit gamma	GCA_030587405.2	MEX2704303.1	A	TRUE	C	COG1456@1|root,arCOG01979@2157|Archaea,2XUSG@28890|Euryarchaeota,2N9BD@224756|Methanomicrobia	Part of a complex that catalyzes the reversible cleavage of acetyl-CoA, allowing	One carbon pool	ko00680,ko00720,ko01120,ko01200,map00680,map00720,map01120,map01200	2.1.1.245	JAUQZD020000021.1	26043	27809
MEX2704299.1	acetyl-CoA decarbonylase/synthase complex subunit gamma	GCA_030587405.2	MEX2704303.1	A	TRUE	C	COG1456@1|root,arCOG01979@2157|Archaea,2XUSG@28890|Euryarchaeota,2N9BD@224756|Methanomicrobia	Part of a complex that catalyzes the reversible cleavage of acetyl-CoA, allowing	One carbon pool	ko00680,ko00720,ko01120,ko01200,map00680,map00720,map01120,map01200	2.1.1.245	JAUQZD020000021.1	26043	27809
MEX2704300.1	CO dehydrogenase/acetyl-CoA synthase subunit delta	GCA_030587405.2	MEX2704303.1	A	TRUE	C	COG2069@1|root,arCOG01980@2157|Archaea,2XTXS@28890|Euryarchaeota,245TW@183980|Archaeoglobi	Part of a complex that catalyzes the reversible cleavage of acetyl-CoA, allowing autotrophic growth from CO(2). Probably maintains the overall quaternary structure of the ACDS complex	One carbon pool	ko00680,ko00720,ko01120,ko01200,map00680,map00720,map01120,map01200	2.1.1.245	JAUQZD020000021.1	27820	29052
MEX2704300.1	CO dehydrogenase/acetyl-CoA synthase subunit delta	GCA_030587405.2	MEX2704303.1	A	TRUE	C	COG2069@1|root,arCOG01980@2157|Archaea,2XTXS@28890|Euryarchaeota,245TW@183980|Archaeoglobi	Part of a complex that catalyzes the reversible cleavage of acetyl-CoA, allowing autotrophic growth from CO(2). Probably maintains the overall quaternary structure of the ACDS complex	One carbon pool	ko00680,ko00720,ko01120,ko01200,map00680,map00720,map01120,map01200	2.1.1.245	JAUQZD020000021.1	27820	29052
MEX2704301.1	CO dehydrogenase/CO-methylating acetyl-CoA synthase complex subunit beta	GCA_030587405.2	MEX2704303.1	A	TRUE	C	COG1614@1|root,arCOG04360@2157|Archaea,2XU0D@28890|Euryarchaeota,2N95I@224756|Methanomicrobia	Part of a complex that catalyzes the reversible cleavage of acetyl-CoA, allowing growth on acetate as sole source of carbon and energy. The alpha-epsilon complex generates CO from CO(2), while the beta subunit (this protein) combines the CO with CoA and a methyl group to form acetyl-CoA. The methyl group, which is incorporated into acetyl-CoA, is transferred to the beta subunit by a corrinoid iro…	One carbon pool	ko00680,ko01120,ko01200,map00680,map01120,map01200		JAUQZD020000021.1	29064	30557
MEX2704301.1	CO dehydrogenase/CO-methylating acetyl-CoA synthase complex subunit beta	GCA_030587405.2	MEX2704303.1	A	TRUE	C	COG1614@1|root,arCOG04360@2157|Archaea,2XU0D@28890|Euryarchaeota,2N95I@224756|Methanomicrobia	Part of a complex that catalyzes the reversible cleavage of acetyl-CoA, allowing growth on acetate as sole source of carbon and energy. The alpha-epsilon complex generates CO from CO(2), while the beta subunit (this protein) combines the CO with CoA and a methyl group to form acetyl-CoA. The methyl group, which is incorporated into acetyl-CoA, is transferred to the beta subunit by a corrinoid iro…	One carbon pool	ko00680,ko01120,ko01200,map00680,map01120,map01200		JAUQZD020000021.1	29064	30557
MEX2704302.1	CO dehydrogenase/acetyl-CoA synthase complex subunit epsilon	GCA_030587405.2	MEX2704303.1	A	TRUE	C	COG1880@1|root,arCOG04408@2157|Archaea,2XWPE@28890|Euryarchaeota,245XY@183980|Archaeoglobi	Part of a complex that catalyzes the reversible cleavage of acetyl-CoA, allowing autotrophic growth from CO(2). The alpha- epsilon subcomponent functions as a carbon monoxide dehydrogenase. The precise role of the epsilon subunit is unclear	One carbon pool	ko00680,ko01120,ko01200,map00680,map01120,map01200		JAUQZD020000021.1	30605	31144
MEX2704302.1	CO dehydrogenase/acetyl-CoA synthase complex subunit epsilon	GCA_030587405.2	MEX2704303.1	A	TRUE	C	COG1880@1|root,arCOG04408@2157|Archaea,2XWPE@28890|Euryarchaeota,245XY@183980|Archaeoglobi	Part of a complex that catalyzes the reversible cleavage of acetyl-CoA, allowing autotrophic growth from CO(2). The alpha- epsilon subcomponent functions as a carbon monoxide dehydrogenase. The precise role of the epsilon subunit is unclear	One carbon pool	ko00680,ko01120,ko01200,map00680,map01120,map01200		JAUQZD020000021.1	30605	31144
MEX2704303.1	CO dehydrogenase/acetyl-CoA synthase complex subunit alpha	GCA_030587405.2	MEX2704303.1	A	FALSE	unknown		unknown	CODH			JAUQZD020000021.1	31159	33522
MEX2704304.1	formylmethanofuran--tetrahydromethanopterin N-formyltransferase	GCA_030587405.2	MEX2704303.1	A	TRUE	H	COG2037@1|root,arCOG02695@2157|Archaea,2XT8E@28890|Euryarchaeota,23Q6M@183939|Methanococci	Catalyzes the reversible transfer of a formyl group from formylmethanofuran (formyl-MFR) to tetrahydromethanopterin (H(4)MPT) so as to produce 5-formyl tetrahydromethanopterin (5- formyl-H(4)MPT) and methanofuran (MFR)	One carbon pool	ko00680,ko01100,ko01120,ko01200,map00680,map01100,map01120,map01200	2.3.1.101	JAUQZD020000021.1	33784	34665
MEX2704304.1	formylmethanofuran--tetrahydromethanopterin N-formyltransferase	GCA_030587405.2	MEX2704303.1	A	TRUE	H	COG2037@1|root,arCOG02695@2157|Archaea,2XT8E@28890|Euryarchaeota,23Q6M@183939|Methanococci	Catalyzes the reversible transfer of a formyl group from formylmethanofuran (formyl-MFR) to tetrahydromethanopterin (H(4)MPT) so as to produce 5-formyl tetrahydromethanopterin (5- formyl-H(4)MPT) and methanofuran (MFR)	One carbon pool	ko00680,ko01100,ko01120,ko01200,map00680,map01100,map01120,map01200	2.3.1.101	JAUQZD020000021.1	33784	34665
MEX2706324.1	4Fe-4S dicluster domain-containing protein	GCA_030587405.2	MEX2706328.1	A	TRUE	C	COG1145@1|root,arCOG02180@2157|Archaea,2XV84@28890|Euryarchaeota,2N9ND@224756|Methanomicrobia	PFAM 4Fe-4S ferredoxin, iron-sulfur binding domain protein	FeS	ko00680,ko01100,ko01120,ko01200,map00680,map01100,map01120,map01200		JAUQZD020000084.1	58896	59567
MEX2706325.1	4Fe-4S binding protein	GCA_030587405.2	MEX2706328.1	A	TRUE	C	COG1148@1|root,arCOG02235@2157|Archaea,2XT3X@28890|Euryarchaeota,23QK4@183939|Methanococci	PFAM 4Fe-4S ferredoxin, iron-sulfur binding domain protein	FeS	ko00680,ko01100,ko01120,ko01200,map00680,map01100,map01120,map01200	1.8.7.3,1.8.98.4,1.8.98.5,1.8.98.6	JAUQZD020000084.1	59784	61676
Q6352_013900	hydrogenase iron-sulfur subunit	GCA_030587405.2	MEX2706328.1	A	TRUE	unknown		unknown	Hydrogenase			JAUQZD020000084.1	61766	62122
MEX2706326.1	Coenzyme F420 hydrogenase/dehydrogenase%2C beta subunit C-terminal domain	GCA_030587405.2	MEX2706328.1	A	TRUE	C	COG1035@1|root,arCOG02653@2157|Archaea,2XUJW@28890|Euryarchaeota,2NAG3@224756|Methanomicrobia	Coenzyme F420 hydrogenase dehydrogenase, beta subunit	unknown	ko00630,ko00680,ko01100,ko01120,ko01200,map00630,map00680,map01100,map01120,map01200	1.17.1.9	JAUQZD020000084.1	62275	63423
MEX2706327.1	3-methyl-2-oxobutanoate hydroxymethyltransferase	GCA_030587405.2	MEX2706328.1	A	TRUE	H	COG0413@1|root,COG0413@2|Bacteria,1TPZA@1239|Firmicutes,248RR@186801|Clostridia,260CY@186807|Peptococcaceae	Catalyzes the reversible reaction in which hydroxymethyl group from 5,10-methylenetetrahydrofolate is transferred onto alpha-ketoisovalerate to form ketopantoate	unknown	ko00770,ko01100,ko01110,map00770,map01100,map01110	2.1.2.11	JAUQZD020000084.1	63539	64393
MEX2706328.1	hypothetical protein	GCA_030587405.2	MEX2706328.1	A	FALSE	unknown		unknown	CODH			JAUQZD020000084.1	64499	66961
MEX2706329.1	V4R domain-containing protein	GCA_030587405.2	MEX2706328.1	A	TRUE	T	COG0467@1|root,arCOG01693@2157|Archaea,2Y2J5@28890|Euryarchaeota,243UF@183968|Thermococci	V4R	Regulation			JAUQZD020000084.1	67164	68399
MEX2706330.1	V4R domain-containing protein	GCA_030587405.2	MEX2706328.1	A	TRUE	unknown		unknown	Regulation			JAUQZD020000084.1	68455	69702
MDY0129555.1	CO dehydrogenase/acetyl-CoA synthase complex subunit alpha	GCA_034005665.1	MDY0129555.1	A	FALSE	unknown		unknown	CODH			JAVEUH010000121.1	3286	5712
MDY0129556.1	CO dehydrogenase/acetyl-CoA synthase complex subunit epsilon	GCA_034005665.1	MDY0129555.1	A	TRUE	C	COG1880@1|root,arCOG04408@2157|Archaea,2XWPE@28890|Euryarchaeota,2NA4Z@224756|Methanomicrobia	Part of a complex that catalyzes the reversible cleavage of acetyl-CoA, allowing growth on acetate as sole source of carbon and energy. The alpha-epsilon subcomponent functions as a carbon monoxide dehydrogenase. The precise role of the epsilon subunit is unclear	One carbon pool	ko00680,ko01120,ko01200,map00680,map01120,map01200		JAVEUH010000121.1	5715	6227
MDY0129556.1	CO dehydrogenase/acetyl-CoA synthase complex subunit epsilon	GCA_034005665.1	MDY0129555.1	A	TRUE	C	COG1880@1|root,arCOG04408@2157|Archaea,2XWPE@28890|Euryarchaeota,2NA4Z@224756|Methanomicrobia	Part of a complex that catalyzes the reversible cleavage of acetyl-CoA, allowing growth on acetate as sole source of carbon and energy. The alpha-epsilon subcomponent functions as a carbon monoxide dehydrogenase. The precise role of the epsilon subunit is unclear	One carbon pool	ko00680,ko01120,ko01200,map00680,map01120,map01200		JAVEUH010000121.1	5715	6227
MDY0129557.1	acetyl-CoA decarbonylase/synthase complex subunit beta	GCA_034005665.1	MDY0129555.1	A	TRUE	C	COG1614@1|root,arCOG04360@2157|Archaea,2XU0D@28890|Euryarchaeota,2N95I@224756|Methanomicrobia	Part of a complex that catalyzes the reversible cleavage of acetyl-CoA, allowing growth on acetate as sole source of carbon and energy. The alpha-epsilon complex generates CO from CO(2), while the beta subunit (this protein) combines the CO with CoA and a methyl group to form acetyl-CoA. The methyl group, which is incorporated into acetyl-CoA, is transferred to the beta subunit by a corrinoid iro…	One carbon pool	ko00680,ko01120,ko01200,map00680,map01120,map01200		JAVEUH010000121.1	6252	6431
MDY0129557.1	acetyl-CoA decarbonylase/synthase complex subunit beta	GCA_034005665.1	MDY0129555.1	A	TRUE	C	COG1614@1|root,arCOG04360@2157|Archaea,2XU0D@28890|Euryarchaeota,2N95I@224756|Methanomicrobia	Part of a complex that catalyzes the reversible cleavage of acetyl-CoA, allowing growth on acetate as sole source of carbon and energy. The alpha-epsilon complex generates CO from CO(2), while the beta subunit (this protein) combines the CO with CoA and a methyl group to form acetyl-CoA. The methyl group, which is incorporated into acetyl-CoA, is transferred to the beta subunit by a corrinoid iro…	One carbon pool	ko00680,ko01120,ko01200,map00680,map01120,map01200		JAVEUH010000121.1	6252	6431
HQE71742.1	hypothetical protein	GCA_035415585.1	HQE71745.1	A	TRUE	unknown		unknown	unknown			DAOOGH010000096.1	252	422
HQE71743.1	CO dehydrogenase/CO-methylating acetyl-CoA synthase complex subunit beta	GCA_035415585.1	HQE71745.1	A	TRUE	C	COG1614@1|root,arCOG04360@2157|Archaea,2XU0D@28890|Euryarchaeota,2462N@183980|Archaeoglobi	Part of a complex that catalyzes the reversible cleavage of acetyl-CoA, allowing autotrophic growth from CO(2). The alpha- epsilon complex generates CO from CO(2), while the beta subunit (this protein) combines the CO with CoA and a methyl group to form acetyl-CoA. The methyl group, which is incorporated into acetyl- CoA, is transferred to the beta subunit by a corrinoid iron-sulfur protein (the …	One carbon pool	ko00680,ko01120,ko01200,map00680,map01120,map01200		DAOOGH010000096.1	455	1861
HQE71743.1	CO dehydrogenase/CO-methylating acetyl-CoA synthase complex subunit beta	GCA_035415585.1	HQE71745.1	A	TRUE	C	COG1614@1|root,arCOG04360@2157|Archaea,2XU0D@28890|Euryarchaeota,2462N@183980|Archaeoglobi	Part of a complex that catalyzes the reversible cleavage of acetyl-CoA, allowing autotrophic growth from CO(2). The alpha- epsilon complex generates CO from CO(2), while the beta subunit (this protein) combines the CO with CoA and a methyl group to form acetyl-CoA. The methyl group, which is incorporated into acetyl- CoA, is transferred to the beta subunit by a corrinoid iron-sulfur protein (the …	One carbon pool	ko00680,ko01120,ko01200,map00680,map01120,map01200		DAOOGH010000096.1	455	1861
HQE71744.1	CO dehydrogenase/acetyl-CoA synthase complex subunit epsilon	GCA_035415585.1	HQE71745.1	A	TRUE	C	COG1880@1|root,arCOG04408@2157|Archaea,2XWPE@28890|Euryarchaeota	Part of a complex that catalyzes the reversible cleavage of acetyl-CoA, allowing autotrophic growth from CO(2). The alpha- epsilon subcomponent functions as a carbon monoxide dehydrogenase. The precise role of the epsilon subunit is unclear	One carbon pool	ko00680,ko01120,ko01200,map00680,map01120,map01200		DAOOGH010000096.1	1902	2465
HQE71744.1	CO dehydrogenase/acetyl-CoA synthase complex subunit epsilon	GCA_035415585.1	HQE71745.1	A	TRUE	C	COG1880@1|root,arCOG04408@2157|Archaea,2XWPE@28890|Euryarchaeota	Part of a complex that catalyzes the reversible cleavage of acetyl-CoA, allowing autotrophic growth from CO(2). The alpha- epsilon subcomponent functions as a carbon monoxide dehydrogenase. The precise role of the epsilon subunit is unclear	One carbon pool	ko00680,ko01120,ko01200,map00680,map01120,map01200		DAOOGH010000096.1	1902	2465
HQE71745.1	CO dehydrogenase/acetyl-CoA synthase complex subunit alpha	GCA_035415585.1	HQE71745.1	A	FALSE	unknown		unknown	CODH			DAOOGH010000096.1	2486	4914
HWQ44740.1	CO dehydrogenase/acetyl-CoA synthase complex subunit alpha	GCA_035560895.1	HWQ44740.1	A	FALSE	unknown		unknown	CODH			DATMYO010000222.1	84	2501
HWQ44741.1	CO dehydrogenase/acetyl-CoA synthase complex subunit epsilon	GCA_035560895.1	HWQ44740.1	A	TRUE	C	COG1880@1|root,arCOG04408@2157|Archaea,2XWPE@28890|Euryarchaeota,2NA4Z@224756|Methanomicrobia	Part of a complex that catalyzes the reversible cleavage of acetyl-CoA, allowing growth on acetate as sole source of carbon and energy. The alpha-epsilon subcomponent functions as a carbon monoxide dehydrogenase. The precise role of the epsilon subunit is unclear	One carbon pool	ko00680,ko01120,ko01200,map00680,map01120,map01200		DATMYO010000222.1	2504	3005
HWQ44741.1	CO dehydrogenase/acetyl-CoA synthase complex subunit epsilon	GCA_035560895.1	HWQ44740.1	A	TRUE	C	COG1880@1|root,arCOG04408@2157|Archaea,2XWPE@28890|Euryarchaeota,2NA4Z@224756|Methanomicrobia	Part of a complex that catalyzes the reversible cleavage of acetyl-CoA, allowing growth on acetate as sole source of carbon and energy. The alpha-epsilon subcomponent functions as a carbon monoxide dehydrogenase. The precise role of the epsilon subunit is unclear	One carbon pool	ko00680,ko01120,ko01200,map00680,map01120,map01200		DATMYO010000222.1	2504	3005
SCG86369.1	Acetyl-CoA decarbonylase/synthase complex subunit epsilon	GCA_900095295.1	SCG86370.1	A	TRUE	C	COG1880@1|root,arCOG04408@2157|Archaea,2XWPE@28890|Euryarchaeota	Part of a complex that catalyzes the reversible cleavage of acetyl-CoA, allowing autotrophic growth from CO(2). The alpha- epsilon subcomponent functions as a carbon monoxide dehydrogenase. The precise role of the epsilon subunit is unclear	One carbon pool	ko00680,ko01120,ko01200,map00680,map01120,map01200		LT607756.1	1870596	1871111
SCG86369.1	Acetyl-CoA decarbonylase/synthase complex subunit epsilon	GCA_900095295.1	SCG86370.1	A	TRUE	C	COG1880@1|root,arCOG04408@2157|Archaea,2XWPE@28890|Euryarchaeota	Part of a complex that catalyzes the reversible cleavage of acetyl-CoA, allowing autotrophic growth from CO(2). The alpha- epsilon subcomponent functions as a carbon monoxide dehydrogenase. The precise role of the epsilon subunit is unclear	One carbon pool	ko00680,ko01120,ko01200,map00680,map01120,map01200		LT607756.1	1870596	1871111
SCG86370.1	Acetyl-CoA decarbonylase/synthase complex subunit alpha	GCA_900095295.1	SCG86370.1	A	FALSE	unknown		unknown	CODH			LT607756.1	1871148	1873484
CAB3288899.1	Acetyl-CoA decarbonylase/synthase complex subunit beta 2	GCA_902827205.1	CAB3288905.1	A	TRUE	C	COG1614@1|root,arCOG04360@2157|Archaea,2XU0D@28890|Euryarchaeota,23Q7P@183939|Methanococci	Part of a complex that catalyzes the reversible cleavage of acetyl-CoA, allowing autotrophic growth from CO(2). The alpha- epsilon complex generates CO from CO(2), while the beta subunit (this protein) combines the CO with CoA and a methyl group to form acetyl-CoA. The methyl group, which is incorporated into acetyl- CoA, is transferred to the beta subunit by a corrinoid iron-sulfur protein (the …	One carbon pool	ko00680,ko01120,ko01200,map00680,map01120,map01200	1.2.7.4	LR792634.1	848954	850381
CAB3288899.1	Acetyl-CoA decarbonylase/synthase complex subunit beta 2	GCA_902827205.1	CAB3288905.1	A	TRUE	C	COG1614@1|root,arCOG04360@2157|Archaea,2XU0D@28890|Euryarchaeota,23Q7P@183939|Methanococci	Part of a complex that catalyzes the reversible cleavage of acetyl-CoA, allowing autotrophic growth from CO(2). The alpha- epsilon complex generates CO from CO(2), while the beta subunit (this protein) combines the CO with CoA and a methyl group to form acetyl-CoA. The methyl group, which is incorporated into acetyl- CoA, is transferred to the beta subunit by a corrinoid iron-sulfur protein (the …	One carbon pool	ko00680,ko01120,ko01200,map00680,map01120,map01200	1.2.7.4	LR792634.1	848954	850381
CAB3288901.1	Iron-sulfur protein clustered with CO dehydrogenase/acetyl-CoA synthase	GCA_902827205.1	CAB3288905.1	A	TRUE	C	COG1142@1|root,arCOG01502@2157|Archaea,2XXPM@28890|Euryarchaeota,23QVU@183939|Methanococci	PFAM 4Fe-4S ferredoxin, iron-sulfur binding domain protein	FeS			LR792634.1	850390	850845
CAB3288903.1	Acetyl-CoA decarbonylase/synthase complex subunit epsilon	GCA_902827205.1	CAB3288905.1	A	TRUE	C	COG1880@1|root,arCOG04408@2157|Archaea,2XZG7@28890|Euryarchaeota,23R6S@183939|Methanococci	PFAM CO dehydrogenase beta subunit acetyl-CoA synthase epsilon subunit	One carbon pool	ko00680,ko01120,ko01200,map00680,map01120,map01200		LR792634.1	850847	851287
CAB3288903.1	Acetyl-CoA decarbonylase/synthase complex subunit epsilon	GCA_902827205.1	CAB3288905.1	A	TRUE	C	COG1880@1|root,arCOG04408@2157|Archaea,2XZG7@28890|Euryarchaeota,23R6S@183939|Methanococci	PFAM CO dehydrogenase beta subunit acetyl-CoA synthase epsilon subunit	One carbon pool	ko00680,ko01120,ko01200,map00680,map01120,map01200		LR792634.1	850847	851287
CAB3288905.1	Acetyl-CoA decarbonylase/synthase complex subunit alpha	GCA_902827205.1	CAB3288905.1	A	FALSE	unknown		unknown	CODH			LR792634.1	851348	853696
CAB3288907.1	protein of unknown function	GCA_902827205.1	CAB3288905.1	A	TRUE	unknown		unknown	unknown			LR792634.1	853901	854020
WP_011034017.1	AAA family ATPase	GCF_000007065.1	WP_011034020.1	A	TRUE	D	COG3640@1|root,arCOG00587@2157|Archaea,2XT61@28890|Euryarchaeota,2N9QI@224756|Methanomicrobia	AAA domain	CooC			NC_003901.1	2487034	2487795
WP_011034018.1	CO dehydrogenase/CO-methylating acetyl-CoA synthase complex subunit beta	GCF_000007065.1	WP_011034020.1	A	TRUE	C	COG1614@1|root,arCOG04360@2157|Archaea,2XU0D@28890|Euryarchaeota,2N95I@224756|Methanomicrobia	Part of a complex that catalyzes the reversible cleavage of acetyl-CoA, allowing growth on acetate as sole source of carbon and energy. The alpha-epsilon complex generates CO from CO(2), while the beta subunit (this protein) combines the CO with CoA and a methyl group to form acetyl-CoA. The methyl group, which is incorporated into acetyl-CoA, is transferred to the beta subunit by a corrinoid iro…	One carbon pool	ko00680,ko01120,ko01200,map00680,map01120,map01200		NC_003901.1	2487851	2489263
WP_011034018.1	CO dehydrogenase/CO-methylating acetyl-CoA synthase complex subunit beta	GCF_000007065.1	WP_011034020.1	A	TRUE	C	COG1614@1|root,arCOG04360@2157|Archaea,2XU0D@28890|Euryarchaeota,2N95I@224756|Methanomicrobia	Part of a complex that catalyzes the reversible cleavage of acetyl-CoA, allowing growth on acetate as sole source of carbon and energy. The alpha-epsilon complex generates CO from CO(2), while the beta subunit (this protein) combines the CO with CoA and a methyl group to form acetyl-CoA. The methyl group, which is incorporated into acetyl-CoA, is transferred to the beta subunit by a corrinoid iro…	One carbon pool	ko00680,ko01120,ko01200,map00680,map01120,map01200		NC_003901.1	2487851	2489263
WP_011034019.1	CO dehydrogenase/acetyl-CoA synthase complex subunit epsilon	GCF_000007065.1	WP_011034020.1	A	TRUE	C	COG1880@1|root,arCOG04408@2157|Archaea,2XWPE@28890|Euryarchaeota,2NA4Z@224756|Methanomicrobia	Part of a complex that catalyzes the reversible cleavage of acetyl-CoA, allowing growth on acetate as sole source of carbon and energy. The alpha-epsilon subcomponent functions as a carbon monoxide dehydrogenase. The precise role of the epsilon subunit is unclear	One carbon pool	ko00680,ko01120,ko01200,map00680,map01120,map01200		NC_003901.1	2489289	2489801
WP_011034019.1	CO dehydrogenase/acetyl-CoA synthase complex subunit epsilon	GCF_000007065.1	WP_011034020.1	A	TRUE	C	COG1880@1|root,arCOG04408@2157|Archaea,2XWPE@28890|Euryarchaeota,2NA4Z@224756|Methanomicrobia	Part of a complex that catalyzes the reversible cleavage of acetyl-CoA, allowing growth on acetate as sole source of carbon and energy. The alpha-epsilon subcomponent functions as a carbon monoxide dehydrogenase. The precise role of the epsilon subunit is unclear	One carbon pool	ko00680,ko01120,ko01200,map00680,map01120,map01200		NC_003901.1	2489289	2489801
WP_011034020.1	CO dehydrogenase/acetyl-CoA synthase complex subunit alpha	GCF_000007065.1	WP_011034020.1	A	FALSE	unknown		unknown	CODH			NC_003901.1	2489804	2492224
WP_011019086.1	CO dehydrogenase/acetyl-CoA synthase complex subunit alpha	GCF_000007185.1	WP_011019086.1	A	FALSE	unknown		unknown	CODH			NC_003551.1	682947	685229
WP_011019087.1	carbon monoxide dehydrogenase beta subunit family protein	GCF_000007185.1	WP_011019086.1	A	TRUE	unknown		unknown	unknown			NC_003551.1	685235	685714
WP_011019088.1	acetyl-CoA synthase	GCF_000007185.1	WP_011019086.1	A	TRUE	C	COG1152@1|root,arCOG02428@2157|Archaea,2XTBY@28890|Euryarchaeota	Part of the ACDS complex that catalyzes the reversible cleavage of acetyl-CoA, allowing autotrophic growth from CO(2). The alpha-epsilon subcomponent functions as a carbon monoxide dehydrogenase	unknown	ko00680,ko01120,ko01200,map00680,map01120,map01200	1.2.7.4	NC_003551.1	685725	687623
WP_011019089.1	CO dehydrogenase/CO-methylating acetyl-CoA synthase complex subunit beta	GCF_000007185.1	WP_011019086.1	A	TRUE	C	COG1614@1|root,arCOG04360@2157|Archaea,2XU0D@28890|Euryarchaeota,23Q7P@183939|Methanococci	Part of a complex that catalyzes the reversible cleavage of acetyl-CoA, allowing autotrophic growth from CO(2). The alpha- epsilon complex generates CO from CO(2), while the beta subunit (this protein) combines the CO with CoA and a methyl group to form acetyl-CoA. The methyl group, which is incorporated into acetyl- CoA, is transferred to the beta subunit by a corrinoid iron-sulfur protein (the …	One carbon pool	ko00680,ko01120,ko01200,map00680,map01120,map01200	1.2.7.4	NC_003551.1	687632	689035
WP_011019089.1	CO dehydrogenase/CO-methylating acetyl-CoA synthase complex subunit beta	GCF_000007185.1	WP_011019086.1	A	TRUE	C	COG1614@1|root,arCOG04360@2157|Archaea,2XU0D@28890|Euryarchaeota,23Q7P@183939|Methanococci	Part of a complex that catalyzes the reversible cleavage of acetyl-CoA, allowing autotrophic growth from CO(2). The alpha- epsilon complex generates CO from CO(2), while the beta subunit (this protein) combines the CO with CoA and a methyl group to form acetyl-CoA. The methyl group, which is incorporated into acetyl- CoA, is transferred to the beta subunit by a corrinoid iron-sulfur protein (the …	One carbon pool	ko00680,ko01120,ko01200,map00680,map01120,map01200	1.2.7.4	NC_003551.1	687632	689035
WP_011019090.1	AAA family ATPase	GCF_000007185.1	WP_011019086.1	A	TRUE	D	COG3640@1|root,arCOG00587@2157|Archaea,2XT61@28890|Euryarchaeota	PFAM Cobyrinic acid a,c-diamide synthase	CooC			NC_003551.1	689032	689805
WP_011019091.1	CO dehydrogenase/acetyl-CoA synthase subunit delta	GCF_000007185.1	WP_011019086.1	A	TRUE	C	COG2069@1|root,arCOG01980@2157|Archaea,2XTXS@28890|Euryarchaeota	Part of a complex that catalyzes the reversible cleavage of acetyl-CoA, allowing autotrophic growth from CO(2). Probably maintains the overall quaternary structure of the ACDS complex	One carbon pool	ko00680,ko00720,ko01120,ko01200,map00680,map00720,map01120,map01200	2.1.1.245	NC_003551.1	689798	691000
WP_011019091.1	CO dehydrogenase/acetyl-CoA synthase subunit delta	GCF_000007185.1	WP_011019086.1	A	TRUE	C	COG2069@1|root,arCOG01980@2157|Archaea,2XTXS@28890|Euryarchaeota	Part of a complex that catalyzes the reversible cleavage of acetyl-CoA, allowing autotrophic growth from CO(2). Probably maintains the overall quaternary structure of the ACDS complex	One carbon pool	ko00680,ko00720,ko01120,ko01200,map00680,map00720,map01120,map01200	2.1.1.245	NC_003551.1	689798	691000
WP_011019092.1	acetyl-CoA decarbonylase/synthase complex subunit gamma	GCF_000007185.1	WP_011019086.1	A	TRUE	H	COG1456@1|root,arCOG01979@2157|Archaea,2XUSG@28890|Euryarchaeota,23QH9@183939|Methanococci	Part of a complex that catalyzes the reversible cleavage of acetyl-CoA, allowing autotrophic growth from CO(2)	One carbon pool	ko00680,ko00720,ko01120,ko01200,map00680,map00720,map01120,map01200	2.1.1.245	NC_003551.1	691014	692402
WP_011019092.1	acetyl-CoA decarbonylase/synthase complex subunit gamma	GCF_000007185.1	WP_011019086.1	A	TRUE	H	COG1456@1|root,arCOG01979@2157|Archaea,2XUSG@28890|Euryarchaeota,23QH9@183939|Methanococci	Part of a complex that catalyzes the reversible cleavage of acetyl-CoA, allowing autotrophic growth from CO(2)	One carbon pool	ko00680,ko00720,ko01120,ko01200,map00680,map00720,map01120,map01200	2.1.1.245	NC_003551.1	691014	692402
WP_226988720.1	SDR family oxidoreductase	GCF_000007185.1	WP_011019086.1	A	TRUE	M	COG1087@1|root,COG1087@2|Bacteria	UDP-glucose 4-epimerase activity	unknown	ko00052,ko00520,ko00523,ko01100,ko01130,map00052,map00520,map00523,map01100,map01130	5.1.3.2,5.1.3.25	NC_003551.1	692466	693386
WP_011019094.1	4Fe-4S dicluster domain-containing protein	GCF_000007185.1	WP_011019086.1	A	TRUE	C	COG1142@1|root,arCOG01502@2157|Archaea,2XXPM@28890|Euryarchaeota,23QVU@183939|Methanococci	PFAM 4Fe-4S ferredoxin, iron-sulfur binding domain protein	FeS			NC_003551.1	693426	693929
WP_011019095.1	AAA family ATPase	GCF_000007185.1	WP_011019086.1	A	TRUE	D	COG3640@1|root,arCOG00587@2157|Archaea,2XW7J@28890|Euryarchaeota,23QT8@183939|Methanococci	PFAM Cobyrinic acid a,c-diamide synthase	CooC			NC_003551.1	693907	694650
WP_011019097.1	2-oxoacid:acceptor oxidoreductase subunit alpha	GCF_000007185.1	WP_011019086.1	A	TRUE	C	COG0674@1|root,arCOG01607@2157|Archaea,2Y7K5@28890|Euryarchaeota,23RI4@183939|Methanococci	PFAM pyruvate flavodoxin ferredoxin oxidoreductase domain protein	unknown	ko00010,ko00020,ko00620,ko00650,ko00720,ko01100,ko01120,ko01130,ko01200,map00010,map00020,map00620,map00650,map00720,map01100,map01120,map01130,map01200	1.2.7.11,1.2.7.3	NC_003551.1	694843	695961
WP_011019098.1	2-oxoacid:ferredoxin oxidoreductase subunit beta	GCF_000007185.1	WP_011019086.1	A	TRUE	C	COG1013@1|root,arCOG01599@2157|Archaea,2XUSE@28890|Euryarchaeota,23NM1@183925|Methanobacteria	PFAM Thiamine pyrophosphate enzyme, C-terminal	unknown	ko00010,ko00020,ko00620,ko00650,ko00720,ko01100,ko01120,ko01130,ko01200,map00010,map00020,map00620,map00650,map00720,map01100,map01120,map01130,map01200	1.2.7.11,1.2.7.3	NC_003551.1	695958	696773
WP_011019099.1	2-oxoacid:ferredoxin oxidoreductase subunit gamma	GCF_000007185.1	WP_011019086.1	A	TRUE	C	COG1014@1|root,arCOG01602@2157|Archaea,2XUK0@28890|Euryarchaeota,23QJ8@183939|Methanococci	PFAM Pyruvate	unknown	ko00020,ko00720,ko01100,ko01120,ko01200,map00020,map00720,map01100,map01120,map01200	1.2.7.3	NC_003551.1	696757	697287
WP_011019100.1	ADP-forming succinate--CoA ligase subunit beta	GCF_000007185.1	WP_011019086.1	A	TRUE	C	COG0045@1|root,arCOG01337@2157|Archaea,2XPUW@28889|Crenarchaeota	Succinyl-CoA synthetase functions in the citric acid cycle (TCA), coupling the hydrolysis of succinyl-CoA to the synthesis of either ATP or GTP and thus represents the only step of substrate-level phosphorylation in the TCA. The beta subunit provides nucleotide specificity of the enzyme and binds the substrate succinate, while the binding sites for coenzyme A and phosphate are found in the alpha …	unknown	ko00020,ko00640,ko00660,ko00720,ko01100,ko01110,ko01120,ko01130,ko01200,map00020,map00640,map00660,map00720,map01100,map01110,map01120,map01130,map01200	6.2.1.5	NC_003551.1	697284	698363
WP_011019101.1	succinate--CoA ligase subunit alpha	GCF_000007185.1	WP_011019086.1	A	TRUE	C	COG0074@1|root,arCOG01339@2157|Archaea,2XPW3@28889|Crenarchaeota	Succinyl-CoA synthetase functions in the citric acid cycle (TCA), coupling the hydrolysis of succinyl-CoA to the synthesis of either ATP or GTP and thus represents the only step of substrate-level phosphorylation in the TCA. The alpha subunit of the enzyme binds the substrates coenzyme A and phosphate, while succinate binding and nucleotide specificity is provided by the beta subunit	unknown	ko00020,ko00640,ko00660,ko00720,ko01100,ko01110,ko01120,ko01130,ko01200,map00020,map00640,map00660,map00720,map01100,map01110,map01120,map01130,map01200	6.2.1.5	NC_003551.1	698367	699230
WP_011019102.1	pantoate kinase	GCF_000007185.1	WP_011019086.1	A	TRUE	S	COG1829@1|root,arCOG04263@2157|Archaea,2XST6@28890|Euryarchaeota,23P1W@183925|Methanobacteria	GHMP kinases N terminal domain	unknown	ko00770,ko01100,map00770,map01100	2.7.1.169	NC_003551.1	699231	700091
WP_011021046.1	acetyl-CoA decarbonylase/synthase complex subunit gamma	GCF_000007345.1	WP_011021051.1	A	TRUE	C	COG1456@1|root,arCOG01979@2157|Archaea,2XUSG@28890|Euryarchaeota,2N9BD@224756|Methanomicrobia	Part of a complex that catalyzes the reversible cleavage of acetyl-CoA, allowing	One carbon pool	ko00680,ko00720,ko01120,ko01200,map00680,map00720,map01120,map01200	2.1.1.245	NC_003552.1	1206107	1207513
WP_011021046.1	acetyl-CoA decarbonylase/synthase complex subunit gamma	GCF_000007345.1	WP_011021051.1	A	TRUE	C	COG1456@1|root,arCOG01979@2157|Archaea,2XUSG@28890|Euryarchaeota,2N9BD@224756|Methanomicrobia	Part of a complex that catalyzes the reversible cleavage of acetyl-CoA, allowing	One carbon pool	ko00680,ko00720,ko01120,ko01200,map00680,map00720,map01120,map01200	2.1.1.245	NC_003552.1	1206107	1207513
WP_011021047.1	CO dehydrogenase/acetyl-CoA synthase subunit delta	GCF_000007345.1	WP_011021051.1	A	TRUE	C	COG2069@1|root,arCOG01980@2157|Archaea,2XTXS@28890|Euryarchaeota,2N93F@224756|Methanomicrobia	Part of a complex that catalyzes the reversible cleavage of acetyl-CoA, allowing	One carbon pool	ko00680,ko00720,ko01120,ko01200,map00680,map00720,map01120,map01200	2.1.1.245	NC_003552.1	1207517	1208827
WP_011021047.1	CO dehydrogenase/acetyl-CoA synthase subunit delta	GCF_000007345.1	WP_011021051.1	A	TRUE	C	COG2069@1|root,arCOG01980@2157|Archaea,2XTXS@28890|Euryarchaeota,2N93F@224756|Methanomicrobia	Part of a complex that catalyzes the reversible cleavage of acetyl-CoA, allowing	One carbon pool	ko00680,ko00720,ko01120,ko01200,map00680,map00720,map01120,map01200	2.1.1.245	NC_003552.1	1207517	1208827
WP_011023761.1	carbon monoxide dehydrogenase accessory protein CooC	GCF_000007345.1	WP_011021051.1	A	TRUE	D	COG3640@1|root,arCOG00587@2157|Archaea,2XT61@28890|Euryarchaeota,2N9QI@224756|Methanomicrobia	AAA domain	CooC			NC_003552.1	1209064	1209825
WP_011021049.1	CO dehydrogenase/CO-methylating acetyl-CoA synthase complex subunit beta	GCF_000007345.1	WP_011021051.1	A	TRUE	C	COG1614@1|root,arCOG04360@2157|Archaea,2XU0D@28890|Euryarchaeota,2N95I@224756|Methanomicrobia	Part of a complex that catalyzes the reversible cleavage of acetyl-CoA, allowing growth on acetate as sole source of carbon and energy. The alpha-epsilon complex generates CO from CO(2), while the beta subunit (this protein) combines the CO with CoA and a methyl group to form acetyl-CoA. The methyl group, which is incorporated into acetyl-CoA, is transferred to the beta subunit by a corrinoid iro…	One carbon pool	ko00680,ko01120,ko01200,map00680,map01120,map01200		NC_003552.1	1209881	1211290
WP_011021049.1	CO dehydrogenase/CO-methylating acetyl-CoA synthase complex subunit beta	GCF_000007345.1	WP_011021051.1	A	TRUE	C	COG1614@1|root,arCOG04360@2157|Archaea,2XU0D@28890|Euryarchaeota,2N95I@224756|Methanomicrobia	Part of a complex that catalyzes the reversible cleavage of acetyl-CoA, allowing growth on acetate as sole source of carbon and energy. The alpha-epsilon complex generates CO from CO(2), while the beta subunit (this protein) combines the CO with CoA and a methyl group to form acetyl-CoA. The methyl group, which is incorporated into acetyl-CoA, is transferred to the beta subunit by a corrinoid iro…	One carbon pool	ko00680,ko01120,ko01200,map00680,map01120,map01200		NC_003552.1	1209881	1211290
WP_011021050.1	CO dehydrogenase/acetyl-CoA synthase complex subunit epsilon	GCF_000007345.1	WP_011021051.1	A	TRUE	C	COG1880@1|root,arCOG04408@2157|Archaea,2XWPE@28890|Euryarchaeota,2NA4Z@224756|Methanomicrobia	Part of a complex that catalyzes the reversible cleavage of acetyl-CoA, allowing growth on acetate as sole source of carbon and energy. The alpha-epsilon subcomponent functions as a carbon monoxide dehydrogenase. The precise role of the epsilon subunit is unclear	One carbon pool	ko00680,ko01120,ko01200,map00680,map01120,map01200		NC_003552.1	1211315	1211827
WP_011021050.1	CO dehydrogenase/acetyl-CoA synthase complex subunit epsilon	GCF_000007345.1	WP_011021051.1	A	TRUE	C	COG1880@1|root,arCOG04408@2157|Archaea,2XWPE@28890|Euryarchaeota,2NA4Z@224756|Methanomicrobia	Part of a complex that catalyzes the reversible cleavage of acetyl-CoA, allowing growth on acetate as sole source of carbon and energy. The alpha-epsilon subcomponent functions as a carbon monoxide dehydrogenase. The precise role of the epsilon subunit is unclear	One carbon pool	ko00680,ko01120,ko01200,map00680,map01120,map01200		NC_003552.1	1211315	1211827
WP_011021051.1	CO dehydrogenase/acetyl-CoA synthase complex subunit alpha	GCF_000007345.1	WP_011021051.1	A	FALSE	unknown		unknown	CODH			NC_003552.1	1211830	1214250
WP_011023758.1	CO dehydrogenase/acetyl-CoA synthase complex subunit alpha	GCF_000007345.1	WP_011023758.1	A	FALSE	unknown		unknown	CODH			NC_003552.1	4742325	4744742
WP_011023759.1	CO dehydrogenase/acetyl-CoA synthase complex subunit epsilon	GCF_000007345.1	WP_011023758.1	A	TRUE	C	COG1880@1|root,arCOG04408@2157|Archaea,2XWPE@28890|Euryarchaeota,2NA4Z@224756|Methanomicrobia	Part of a complex that catalyzes the reversible cleavage of acetyl-CoA, allowing growth on acetate as sole source of carbon and energy. The alpha-epsilon subcomponent functions as a carbon monoxide dehydrogenase. The precise role of the epsilon subunit is unclear	One carbon pool	ko00680,ko01120,ko01200,map00680,map01120,map01200		NC_003552.1	4744745	4745257
WP_011023759.1	CO dehydrogenase/acetyl-CoA synthase complex subunit epsilon	GCF_000007345.1	WP_011023758.1	A	TRUE	C	COG1880@1|root,arCOG04408@2157|Archaea,2XWPE@28890|Euryarchaeota,2NA4Z@224756|Methanomicrobia	Part of a complex that catalyzes the reversible cleavage of acetyl-CoA, allowing growth on acetate as sole source of carbon and energy. The alpha-epsilon subcomponent functions as a carbon monoxide dehydrogenase. The precise role of the epsilon subunit is unclear	One carbon pool	ko00680,ko01120,ko01200,map00680,map01120,map01200		NC_003552.1	4744745	4745257
WP_011023760.1	CO dehydrogenase/CO-methylating acetyl-CoA synthase complex subunit beta	GCF_000007345.1	WP_011023758.1	A	TRUE	C	COG1614@1|root,arCOG04360@2157|Archaea,2XU0D@28890|Euryarchaeota,2N95I@224756|Methanomicrobia	Part of a complex that catalyzes the reversible cleavage of acetyl-CoA, allowing growth on acetate as sole source of carbon and energy. The alpha-epsilon complex generates CO from CO(2), while the beta subunit (this protein) combines the CO with CoA and a methyl group to form acetyl-CoA. The methyl group, which is incorporated into acetyl-CoA, is transferred to the beta subunit by a corrinoid iro…	One carbon pool	ko00680,ko01120,ko01200,map00680,map01120,map01200		NC_003552.1	4745282	4746694
WP_011023760.1	CO dehydrogenase/CO-methylating acetyl-CoA synthase complex subunit beta	GCF_000007345.1	WP_011023758.1	A	TRUE	C	COG1614@1|root,arCOG04360@2157|Archaea,2XU0D@28890|Euryarchaeota,2N95I@224756|Methanomicrobia	Part of a complex that catalyzes the reversible cleavage of acetyl-CoA, allowing growth on acetate as sole source of carbon and energy. The alpha-epsilon complex generates CO from CO(2), while the beta subunit (this protein) combines the CO with CoA and a methyl group to form acetyl-CoA. The methyl group, which is incorporated into acetyl-CoA, is transferred to the beta subunit by a corrinoid iro…	One carbon pool	ko00680,ko01120,ko01200,map00680,map01120,map01200		NC_003552.1	4745282	4746694
2	carbon monoxide dehydrogenase accessory protein CooC	GCF_000007345.1	WP_011023758.1	A	TRUE	unknown		unknown	CooC			NC_003552.1	4746750	4747511
WP_011023762.1	CO dehydrogenase/acetyl-CoA synthase subunit delta	GCF_000007345.1	WP_011023758.1	A	TRUE	C	COG2069@1|root,arCOG01980@2157|Archaea,2XTXS@28890|Euryarchaeota,2N93F@224756|Methanomicrobia	Part of a complex that catalyzes the reversible cleavage of acetyl-CoA, allowing	One carbon pool	ko00680,ko00720,ko01120,ko01200,map00680,map00720,map01120,map01200	2.1.1.245	NC_003552.1	4747748	4749058
WP_011023762.1	CO dehydrogenase/acetyl-CoA synthase subunit delta	GCF_000007345.1	WP_011023758.1	A	TRUE	C	COG2069@1|root,arCOG01980@2157|Archaea,2XTXS@28890|Euryarchaeota,2N93F@224756|Methanomicrobia	Part of a complex that catalyzes the reversible cleavage of acetyl-CoA, allowing	One carbon pool	ko00680,ko00720,ko01120,ko01200,map00680,map00720,map01120,map01200	2.1.1.245	NC_003552.1	4747748	4749058
2	acetyl-CoA decarbonylase/synthase complex subunit gamma	GCF_000007345.1	WP_011023758.1	A	TRUE	unknown		unknown	One carbon pool			NC_003552.1	4749062	4750468
2	acetyl-CoA decarbonylase/synthase complex subunit gamma	GCF_000007345.1	WP_011023758.1	A	TRUE	unknown		unknown	One carbon pool			NC_003552.1	4749062	4750468
WP_010878596.1	CO dehydrogenase/acetyl-CoA synthase complex subunit alpha	GCF_000008665.1	WP_010878596.1	A	FALSE	unknown		unknown	CODH			NC_000917.1	987324	989732
WP_048064674.1	CO dehydrogenase/acetyl-CoA synthase complex subunit epsilon	GCF_000008665.1	WP_010878596.1	A	TRUE	C	COG1880@1|root,arCOG04408@2157|Archaea,2XWPE@28890|Euryarchaeota,245XY@183980|Archaeoglobi	Part of a complex that catalyzes the reversible cleavage of acetyl-CoA, allowing autotrophic growth from CO(2). The alpha- epsilon subcomponent functions as a carbon monoxide dehydrogenase. The precise role of the epsilon subunit is unclear	One carbon pool	ko00680,ko01120,ko01200,map00680,map01120,map01200		NC_000917.1	989738	990283
WP_048064674.1	CO dehydrogenase/acetyl-CoA synthase complex subunit epsilon	GCF_000008665.1	WP_010878596.1	A	TRUE	C	COG1880@1|root,arCOG04408@2157|Archaea,2XWPE@28890|Euryarchaeota,245XY@183980|Archaeoglobi	Part of a complex that catalyzes the reversible cleavage of acetyl-CoA, allowing autotrophic growth from CO(2). The alpha- epsilon subcomponent functions as a carbon monoxide dehydrogenase. The precise role of the epsilon subunit is unclear	One carbon pool	ko00680,ko01120,ko01200,map00680,map01120,map01200		NC_000917.1	989738	990283
WP_231487648.1	cytochrome c biogenesis protein ResB	GCF_000008665.1	WP_010878596.1	A	TRUE	unknown	arCOG10392@1|root,arCOG10392@2157|Archaea	unknown	unknown			NC_000917.1	990308	990547
WP_010878599.1	DUF429 domain-containing protein	GCF_000008665.1	WP_010878596.1	A	TRUE	S	COG2410@1|root,arCOG04409@2157|Archaea,2Y1Y7@28890|Euryarchaeota	Protein of unknown function (DUF429)	unknown			NC_000917.1	990578	991126
WP_010878600.1	damage-control phosphatase	GCF_000008665.1	WP_010878596.1	A	TRUE	S	COG1578@1|root,arCOG04410@2157|Archaea,2XWGU@28890|Euryarchaeota,246S5@183980|Archaeoglobi	Protein of unknown function DUF89	unknown			NC_000917.1	991157	992023
WP_010878601.1	cysteine-rich small domain-containing protein	GCF_000008665.1	WP_010878596.1	A	TRUE	S	COG2158@1|root,arCOG05056@2157|Archaea,2XXRM@28890|Euryarchaeota,2477V@183980|Archaeoglobi	PFAM Cysteine-rich small domain	unknown			NC_000917.1	992020	992595
WP_010878602.1	rRNA maturation protein	GCF_000008665.1	WP_010878596.1	A	TRUE	J	COG2136@1|root,arCOG03247@2157|Archaea,2XZNB@28890|Euryarchaeota,2476P@183980|Archaeoglobi	Probably involved in the biogenesis of the ribosome	unknown	ko03008,map03008		NC_000917.1	992583	993044
WP_011498962.1	CO dehydrogenase/acetyl-CoA synthase complex subunit alpha	GCF_000013725.1	WP_011498962.1	A	FALSE	unknown		unknown	CODH			NC_007955.1	901941	904349
WP_011498963.1	CO dehydrogenase/acetyl-CoA synthase complex subunit epsilon	GCF_000013725.1	WP_011498962.1	A	TRUE	C	COG1880@1|root,arCOG04408@2157|Archaea,2XWPE@28890|Euryarchaeota,2NA4Z@224756|Methanomicrobia	Part of a complex that catalyzes the reversible cleavage of acetyl-CoA, allowing growth on acetate as sole source of carbon and energy. The alpha-epsilon subcomponent functions as a carbon monoxide dehydrogenase. The precise role of the epsilon subunit is unclear	One carbon pool	ko00680,ko01120,ko01200,map00680,map01120,map01200		NC_007955.1	904352	904867
WP_011498963.1	CO dehydrogenase/acetyl-CoA synthase complex subunit epsilon	GCF_000013725.1	WP_011498962.1	A	TRUE	C	COG1880@1|root,arCOG04408@2157|Archaea,2XWPE@28890|Euryarchaeota,2NA4Z@224756|Methanomicrobia	Part of a complex that catalyzes the reversible cleavage of acetyl-CoA, allowing growth on acetate as sole source of carbon and energy. The alpha-epsilon subcomponent functions as a carbon monoxide dehydrogenase. The precise role of the epsilon subunit is unclear	One carbon pool	ko00680,ko01120,ko01200,map00680,map01120,map01200		NC_007955.1	904352	904867
WP_011498964.1	CO dehydrogenase/CO-methylating acetyl-CoA synthase complex subunit beta	GCF_000013725.1	WP_011498962.1	A	TRUE	C	COG1614@1|root,arCOG04360@2157|Archaea,2XU0D@28890|Euryarchaeota,2N95I@224756|Methanomicrobia	Part of a complex that catalyzes the reversible cleavage of acetyl-CoA, allowing growth on acetate as sole source of carbon and energy. The alpha-epsilon complex generates CO from CO(2), while the beta subunit (this protein) combines the CO with CoA and a methyl group to form acetyl-CoA. The methyl group, which is incorporated into acetyl-CoA, is transferred to the beta subunit by a corrinoid iro…	One carbon pool	ko00680,ko01120,ko01200,map00680,map01120,map01200		NC_007955.1	904916	906328
WP_011498964.1	CO dehydrogenase/CO-methylating acetyl-CoA synthase complex subunit beta	GCF_000013725.1	WP_011498962.1	A	TRUE	C	COG1614@1|root,arCOG04360@2157|Archaea,2XU0D@28890|Euryarchaeota,2N95I@224756|Methanomicrobia	Part of a complex that catalyzes the reversible cleavage of acetyl-CoA, allowing growth on acetate as sole source of carbon and energy. The alpha-epsilon complex generates CO from CO(2), while the beta subunit (this protein) combines the CO with CoA and a methyl group to form acetyl-CoA. The methyl group, which is incorporated into acetyl-CoA, is transferred to the beta subunit by a corrinoid iro…	One carbon pool	ko00680,ko01120,ko01200,map00680,map01120,map01200		NC_007955.1	904916	906328
WP_011498965.1	AAA family ATPase	GCF_000013725.1	WP_011498962.1	A	TRUE	D	COG3640@1|root,arCOG00587@2157|Archaea,2XT61@28890|Euryarchaeota,2N9QI@224756|Methanomicrobia	AAA domain	CooC			NC_007955.1	906341	907093
WP_011498966.1	CO dehydrogenase/acetyl-CoA synthase subunit delta	GCF_000013725.1	WP_011498962.1	A	TRUE	C	COG2069@1|root,arCOG01980@2157|Archaea,2XTXS@28890|Euryarchaeota,2N93F@224756|Methanomicrobia	Part of a complex that catalyzes the reversible cleavage of acetyl-CoA, allowing	One carbon pool	ko00680,ko00720,ko01120,ko01200,map00680,map00720,map01120,map01200	2.1.1.245	NC_007955.1	907134	908453
WP_011498966.1	CO dehydrogenase/acetyl-CoA synthase subunit delta	GCF_000013725.1	WP_011498962.1	A	TRUE	C	COG2069@1|root,arCOG01980@2157|Archaea,2XTXS@28890|Euryarchaeota,2N93F@224756|Methanomicrobia	Part of a complex that catalyzes the reversible cleavage of acetyl-CoA, allowing	One carbon pool	ko00680,ko00720,ko01120,ko01200,map00680,map00720,map01120,map01200	2.1.1.245	NC_007955.1	907134	908453
WP_011498967.1	acetyl-CoA decarbonylase/synthase complex subunit gamma	GCF_000013725.1	WP_011498962.1	A	TRUE	C	COG1456@1|root,arCOG01979@2157|Archaea,2XUSG@28890|Euryarchaeota,2N9BD@224756|Methanomicrobia	Part of a complex that catalyzes the reversible cleavage of acetyl-CoA, allowing	One carbon pool	ko00680,ko00720,ko01120,ko01200,map00680,map00720,map01120,map01200	2.1.1.245	NC_007955.1	908457	909863
WP_011498967.1	acetyl-CoA decarbonylase/synthase complex subunit gamma	GCF_000013725.1	WP_011498962.1	A	TRUE	C	COG1456@1|root,arCOG01979@2157|Archaea,2XUSG@28890|Euryarchaeota,2N9BD@224756|Methanomicrobia	Part of a complex that catalyzes the reversible cleavage of acetyl-CoA, allowing	One carbon pool	ko00680,ko00720,ko01120,ko01200,map00680,map00720,map01120,map01200	2.1.1.245	NC_007955.1	908457	909863
WP_011498968.1	alpha/beta hydrolase	GCF_000013725.1	WP_011498962.1	A	TRUE	S	COG1073@1|root,arCOG01654@2157|Archaea,2Y0NH@28890|Euryarchaeota,2NA0N@224756|Methanomicrobia	Acetyl xylan esterase (AXE1)	Hydrolase			NC_007955.1	909935	910879
WP_175265676.1	PaaI family thioesterase	GCF_000014945.1	WP_011695488.1	A	TRUE	Q	COG2050@1|root,COG2050@2|Bacteria,1RH35@1224|Proteobacteria,42U19@68525|delta/epsilon subdivisions,2WR05@28221|Deltaproteobacteria,2MQJB@213462|Syntrophobacterales	Thioesterase superfamily	unknown	ko00360,map00360		NC_008553.1	284484	284906
WP_011695483.1	acetyl-CoA decarbonylase/synthase complex subunit gamma	GCF_000014945.1	WP_011695488.1	A	TRUE	C	COG1456@1|root,arCOG01979@2157|Archaea,2XUSG@28890|Euryarchaeota,2N9BD@224756|Methanomicrobia	Part of a complex that catalyzes the reversible cleavage of acetyl-CoA, allowing	One carbon pool	ko00680,ko00720,ko01120,ko01200,map00680,map00720,map01120,map01200	2.1.1.245	NC_008553.1	285126	286538
WP_011695483.1	acetyl-CoA decarbonylase/synthase complex subunit gamma	GCF_000014945.1	WP_011695488.1	A	TRUE	C	COG1456@1|root,arCOG01979@2157|Archaea,2XUSG@28890|Euryarchaeota,2N9BD@224756|Methanomicrobia	Part of a complex that catalyzes the reversible cleavage of acetyl-CoA, allowing	One carbon pool	ko00680,ko00720,ko01120,ko01200,map00680,map00720,map01120,map01200	2.1.1.245	NC_008553.1	285126	286538
WP_011695484.1	CO dehydrogenase/acetyl-CoA synthase subunit delta	GCF_000014945.1	WP_011695488.1	A	TRUE	C	COG2069@1|root,arCOG01980@2157|Archaea,2XTXS@28890|Euryarchaeota,2N93F@224756|Methanomicrobia	Part of a complex that catalyzes the reversible cleavage of acetyl-CoA, allowing	One carbon pool	ko00680,ko00720,ko01120,ko01200,map00680,map00720,map01120,map01200	2.1.1.245	NC_008553.1	286544	287902
WP_011695484.1	CO dehydrogenase/acetyl-CoA synthase subunit delta	GCF_000014945.1	WP_011695488.1	A	TRUE	C	COG2069@1|root,arCOG01980@2157|Archaea,2XTXS@28890|Euryarchaeota,2N93F@224756|Methanomicrobia	Part of a complex that catalyzes the reversible cleavage of acetyl-CoA, allowing	One carbon pool	ko00680,ko00720,ko01120,ko01200,map00680,map00720,map01120,map01200	2.1.1.245	NC_008553.1	286544	287902
WP_011695485.1	AAA family ATPase	GCF_000014945.1	WP_011695488.1	A	TRUE	D	COG3640@1|root,arCOG00587@2157|Archaea,2XT61@28890|Euryarchaeota,2N9QI@224756|Methanomicrobia	AAA domain	CooC			NC_008553.1	287915	288676
WP_175265623.1	hypothetical protein	GCF_000014945.1	WP_011695488.1	A	TRUE	unknown		unknown	unknown			NC_008553.1	288690	288878
WP_175265624.1	hypothetical protein	GCF_000014945.1	WP_011695488.1	A	TRUE	unknown		unknown	unknown			NC_008553.1	288935	289120
WP_011695486.1	CO dehydrogenase/CO-methylating acetyl-CoA synthase complex subunit beta	GCF_000014945.1	WP_011695488.1	A	TRUE	C	COG1614@1|root,arCOG04360@2157|Archaea,2XU0D@28890|Euryarchaeota,2462N@183980|Archaeoglobi	Part of a complex that catalyzes the reversible cleavage of acetyl-CoA, allowing autotrophic growth from CO(2). The alpha- epsilon complex generates CO from CO(2), while the beta subunit (this protein) combines the CO with CoA and a methyl group to form acetyl-CoA. The methyl group, which is incorporated into acetyl- CoA, is transferred to the beta subunit by a corrinoid iron-sulfur protein (the …	One carbon pool	ko00680,ko01120,ko01200,map00680,map01120,map01200		NC_008553.1	289137	290546
WP_011695486.1	CO dehydrogenase/CO-methylating acetyl-CoA synthase complex subunit beta	GCF_000014945.1	WP_011695488.1	A	TRUE	C	COG1614@1|root,arCOG04360@2157|Archaea,2XU0D@28890|Euryarchaeota,2462N@183980|Archaeoglobi	Part of a complex that catalyzes the reversible cleavage of acetyl-CoA, allowing autotrophic growth from CO(2). The alpha- epsilon complex generates CO from CO(2), while the beta subunit (this protein) combines the CO with CoA and a methyl group to form acetyl-CoA. The methyl group, which is incorporated into acetyl- CoA, is transferred to the beta subunit by a corrinoid iron-sulfur protein (the …	One carbon pool	ko00680,ko01120,ko01200,map00680,map01120,map01200		NC_008553.1	289137	290546
WP_011695487.1	CO dehydrogenase/acetyl-CoA synthase complex subunit epsilon	GCF_000014945.1	WP_011695488.1	A	TRUE	C	COG1880@1|root,arCOG04408@2157|Archaea,2XWPE@28890|Euryarchaeota	Part of a complex that catalyzes the reversible cleavage of acetyl-CoA, allowing autotrophic growth from CO(2). The alpha- epsilon subcomponent functions as a carbon monoxide dehydrogenase. The precise role of the epsilon subunit is unclear	One carbon pool	ko00680,ko01120,ko01200,map00680,map01120,map01200		NC_008553.1	290597	291145
WP_011695487.1	CO dehydrogenase/acetyl-CoA synthase complex subunit epsilon	GCF_000014945.1	WP_011695488.1	A	TRUE	C	COG1880@1|root,arCOG04408@2157|Archaea,2XWPE@28890|Euryarchaeota	Part of a complex that catalyzes the reversible cleavage of acetyl-CoA, allowing autotrophic growth from CO(2). The alpha- epsilon subcomponent functions as a carbon monoxide dehydrogenase. The precise role of the epsilon subunit is unclear	One carbon pool	ko00680,ko01120,ko01200,map00680,map01120,map01200		NC_008553.1	290597	291145
WP_011695488.1	CO dehydrogenase/acetyl-CoA synthase complex subunit alpha	GCF_000014945.1	WP_011695488.1	A	FALSE	unknown		unknown	CODH			NC_008553.1	291151	293568
WP_011973193.1	CO dehydrogenase/acetyl-CoA synthase complex subunit alpha	GCF_000017185.1	WP_011973193.1	A	FALSE	unknown		unknown	CODH			NC_009635.1	497073	499379
WP_011973880.1	acetyl-CoA decarbonylase/synthase complex subunit alpha/beta	GCF_000017185.1	WP_011973883.1	A	TRUE	C	COG1152@1|root,COG1614@1|root,arCOG02428@2157|Archaea,arCOG04360@2157|Archaea,2XU0D@28890|Euryarchaeota,23Q7P@183939|Methanococci	Part of a complex that catalyzes the reversible cleavage of acetyl-CoA, allowing autotrophic growth from CO(2). The alpha- epsilon complex generates CO from CO(2), while the beta subunit (this protein) combines the CO with CoA and a methyl group to form acetyl-CoA. The methyl group, which is incorporated into acetyl- CoA, is transferred to the beta subunit by a corrinoid iron-sulfur protein (the …	One carbon pool	ko00680,ko01120,ko01200,map00680,map01120,map01200	1.2.7.4	NC_009635.1	1234934	1237225
WP_011973880.1	acetyl-CoA decarbonylase/synthase complex subunit alpha/beta	GCF_000017185.1	WP_011973883.1	A	TRUE	C	COG1152@1|root,COG1614@1|root,arCOG02428@2157|Archaea,arCOG04360@2157|Archaea,2XU0D@28890|Euryarchaeota,23Q7P@183939|Methanococci	Part of a complex that catalyzes the reversible cleavage of acetyl-CoA, allowing autotrophic growth from CO(2). The alpha- epsilon complex generates CO from CO(2), while the beta subunit (this protein) combines the CO with CoA and a methyl group to form acetyl-CoA. The methyl group, which is incorporated into acetyl- CoA, is transferred to the beta subunit by a corrinoid iron-sulfur protein (the …	One carbon pool	ko00680,ko01120,ko01200,map00680,map01120,map01200	1.2.7.4	NC_009635.1	1234934	1237225
WP_011973881.1	4Fe-4S dicluster domain-containing protein	GCF_000017185.1	WP_011973883.1	A	TRUE	C	COG1142@1|root,arCOG01502@2157|Archaea,2XXPM@28890|Euryarchaeota,23QVU@183939|Methanococci	PFAM 4Fe-4S ferredoxin, iron-sulfur binding domain protein	FeS			NC_009635.1	1237376	1237831
WP_011973882.1	carbon monoxide dehydrogenase beta subunit family protein	GCF_000017185.1	WP_011973883.1	A	TRUE	C	COG1880@1|root,arCOG04408@2157|Archaea,2XZG7@28890|Euryarchaeota,23R6S@183939|Methanococci	PFAM CO dehydrogenase beta subunit acetyl-CoA synthase epsilon subunit	One carbon pool	ko00680,ko01120,ko01200,map00680,map01120,map01200		NC_009635.1	1237922	1238353
WP_011973882.1	carbon monoxide dehydrogenase beta subunit family protein	GCF_000017185.1	WP_011973883.1	A	TRUE	C	COG1880@1|root,arCOG04408@2157|Archaea,2XZG7@28890|Euryarchaeota,23R6S@183939|Methanococci	PFAM CO dehydrogenase beta subunit acetyl-CoA synthase epsilon subunit	One carbon pool	ko00680,ko01120,ko01200,map00680,map01120,map01200		NC_009635.1	1237922	1238353
WP_011973883.1	CO dehydrogenase/acetyl-CoA synthase complex subunit alpha	GCF_000017185.1	WP_011973883.1	A	FALSE	unknown		unknown	CODH			NC_009635.1	1238421	1240781
WP_012106919.1	ASKHA domain-containing protein	GCF_000017625.1	WP_012106924.1	A	TRUE	C	COG3894@1|root,arCOG02035@2157|Archaea,2XVBE@28890|Euryarchaeota	PFAM Ferredoxin	One carbon pool			NC_009712.1	1398649	1400496
WP_012106919.1	ASKHA domain-containing protein	GCF_000017625.1	WP_012106924.1	A	TRUE	C	COG3894@1|root,arCOG02035@2157|Archaea,2XVBE@28890|Euryarchaeota	PFAM Ferredoxin	One carbon pool			NC_009712.1	1398649	1400496
WP_012106920.1	acetyl-CoA decarbonylase/synthase complex subunit gamma	GCF_000017625.1	WP_012106924.1	A	TRUE	C	COG1456@1|root,arCOG01979@2157|Archaea,2XUSG@28890|Euryarchaeota,2N9BD@224756|Methanomicrobia	Part of a complex that catalyzes the reversible cleavage of acetyl-CoA, allowing	One carbon pool	ko00680,ko00720,ko01120,ko01200,map00680,map00720,map01120,map01200	2.1.1.245	NC_009712.1	1400570	1402000
WP_012106920.1	acetyl-CoA decarbonylase/synthase complex subunit gamma	GCF_000017625.1	WP_012106924.1	A	TRUE	C	COG1456@1|root,arCOG01979@2157|Archaea,2XUSG@28890|Euryarchaeota,2N9BD@224756|Methanomicrobia	Part of a complex that catalyzes the reversible cleavage of acetyl-CoA, allowing	One carbon pool	ko00680,ko00720,ko01120,ko01200,map00680,map00720,map01120,map01200	2.1.1.245	NC_009712.1	1400570	1402000
WP_012106921.1	CO dehydrogenase/acetyl-CoA synthase subunit delta	GCF_000017625.1	WP_012106924.1	A	TRUE	C	COG2069@1|root,arCOG01980@2157|Archaea,2XTXS@28890|Euryarchaeota,2N93F@224756|Methanomicrobia	Part of a complex that catalyzes the reversible cleavage of acetyl-CoA, allowing	One carbon pool	ko00680,ko00720,ko01120,ko01200,map00680,map00720,map01120,map01200	2.1.1.245	NC_009712.1	1402012	1403247
WP_012106921.1	CO dehydrogenase/acetyl-CoA synthase subunit delta	GCF_000017625.1	WP_012106924.1	A	TRUE	C	COG2069@1|root,arCOG01980@2157|Archaea,2XTXS@28890|Euryarchaeota,2N93F@224756|Methanomicrobia	Part of a complex that catalyzes the reversible cleavage of acetyl-CoA, allowing	One carbon pool	ko00680,ko00720,ko01120,ko01200,map00680,map00720,map01120,map01200	2.1.1.245	NC_009712.1	1402012	1403247
WP_048068361.1	CO dehydrogenase/CO-methylating acetyl-CoA synthase complex subunit beta	GCF_000017625.1	WP_012106924.1	A	TRUE	C	COG1614@1|root,arCOG04360@2157|Archaea,2XU0D@28890|Euryarchaeota,2N95I@224756|Methanomicrobia	Part of a complex that catalyzes the reversible cleavage of acetyl-CoA, allowing growth on acetate as sole source of carbon and energy. The alpha-epsilon complex generates CO from CO(2), while the beta subunit (this protein) combines the CO with CoA and a methyl group to form acetyl-CoA. The methyl group, which is incorporated into acetyl-CoA, is transferred to the beta subunit by a corrinoid iro…	One carbon pool	ko00680,ko01120,ko01200,map00680,map01120,map01200		NC_009712.1	1403251	1404636
WP_048068361.1	CO dehydrogenase/CO-methylating acetyl-CoA synthase complex subunit beta	GCF_000017625.1	WP_012106924.1	A	TRUE	C	COG1614@1|root,arCOG04360@2157|Archaea,2XU0D@28890|Euryarchaeota,2N95I@224756|Methanomicrobia	Part of a complex that catalyzes the reversible cleavage of acetyl-CoA, allowing growth on acetate as sole source of carbon and energy. The alpha-epsilon complex generates CO from CO(2), while the beta subunit (this protein) combines the CO with CoA and a methyl group to form acetyl-CoA. The methyl group, which is incorporated into acetyl-CoA, is transferred to the beta subunit by a corrinoid iro…	One carbon pool	ko00680,ko01120,ko01200,map00680,map01120,map01200		NC_009712.1	1403251	1404636
WP_012106923.1	CO dehydrogenase/acetyl-CoA synthase complex subunit epsilon	GCF_000017625.1	WP_012106924.1	A	TRUE	C	COG1880@1|root,arCOG04408@2157|Archaea,2XWPE@28890|Euryarchaeota	Part of a complex that catalyzes the reversible cleavage of acetyl-CoA, allowing autotrophic growth from CO(2). The alpha- epsilon subcomponent functions as a carbon monoxide dehydrogenase. The precise role of the epsilon subunit is unclear	One carbon pool	ko00680,ko01120,ko01200,map00680,map01120,map01200		NC_009712.1	1404629	1405183
WP_012106923.1	CO dehydrogenase/acetyl-CoA synthase complex subunit epsilon	GCF_000017625.1	WP_012106924.1	A	TRUE	C	COG1880@1|root,arCOG04408@2157|Archaea,2XWPE@28890|Euryarchaeota	Part of a complex that catalyzes the reversible cleavage of acetyl-CoA, allowing autotrophic growth from CO(2). The alpha- epsilon subcomponent functions as a carbon monoxide dehydrogenase. The precise role of the epsilon subunit is unclear	One carbon pool	ko00680,ko01120,ko01200,map00680,map01120,map01200		NC_009712.1	1404629	1405183
WP_012106924.1	CO dehydrogenase/acetyl-CoA synthase complex subunit alpha	GCF_000017625.1	WP_012106924.1	A	FALSE	unknown		unknown	CODH			NC_009712.1	1405180	1407540
WP_012106925.1	AAA family ATPase	GCF_000017625.1	WP_012106924.1	A	TRUE	D	COG3640@1|root,arCOG00587@2157|Archaea,2XT61@28890|Euryarchaeota	PFAM Cobyrinic acid a,c-diamide synthase	CooC			NC_009712.1	1407646	1408425
WP_012106926.1	cobyrinic acid a%2Cc-diamide synthase	GCF_000017625.1	WP_012106924.1	A	TRUE	D	COG3640@1|root,arCOG00587@2157|Archaea,2XW7J@28890|Euryarchaeota,2N9VV@224756|Methanomicrobia	PFAM Cobyrinic acid a,c-diamide synthase	CooC			NC_009712.1	1408422	1409219
WP_015790779.1	CO dehydrogenase/CO-methylating acetyl-CoA synthase complex subunit beta	GCF_000023985.1	WP_015790782.1	A	TRUE	C	COG1614@1|root,arCOG04360@2157|Archaea,2XU0D@28890|Euryarchaeota,23Q7P@183939|Methanococci	Part of a complex that catalyzes the reversible cleavage of acetyl-CoA, allowing autotrophic growth from CO(2). The alpha- epsilon complex generates CO from CO(2), while the beta subunit (this protein) combines the CO with CoA and a methyl group to form acetyl-CoA. The methyl group, which is incorporated into acetyl- CoA, is transferred to the beta subunit by a corrinoid iron-sulfur protein (the …	One carbon pool	ko00680,ko01120,ko01200,map00680,map01120,map01200	1.2.7.4	NC_013156.1	196356	197762
WP_015790779.1	CO dehydrogenase/CO-methylating acetyl-CoA synthase complex subunit beta	GCF_000023985.1	WP_015790782.1	A	TRUE	C	COG1614@1|root,arCOG04360@2157|Archaea,2XU0D@28890|Euryarchaeota,23Q7P@183939|Methanococci	Part of a complex that catalyzes the reversible cleavage of acetyl-CoA, allowing autotrophic growth from CO(2). The alpha- epsilon complex generates CO from CO(2), while the beta subunit (this protein) combines the CO with CoA and a methyl group to form acetyl-CoA. The methyl group, which is incorporated into acetyl- CoA, is transferred to the beta subunit by a corrinoid iron-sulfur protein (the …	One carbon pool	ko00680,ko01120,ko01200,map00680,map01120,map01200	1.2.7.4	NC_013156.1	196356	197762
WP_015790780.1	4Fe-4S dicluster domain-containing protein	GCF_000023985.1	WP_015790782.1	A	TRUE	C	COG1142@1|root,arCOG01502@2157|Archaea,2XXPM@28890|Euryarchaeota,23QVU@183939|Methanococci	PFAM 4Fe-4S ferredoxin, iron-sulfur binding domain protein	FeS			NC_013156.1	197778	198233
WP_015790781.1	CO dehydrogenase/acetyl-CoA synthase complex subunit epsilon	GCF_000023985.1	WP_015790782.1	A	TRUE	C	COG1880@1|root,arCOG04408@2157|Archaea,2XZG7@28890|Euryarchaeota,23R6S@183939|Methanococci	PFAM CO dehydrogenase beta subunit acetyl-CoA synthase epsilon subunit	One carbon pool	ko00680,ko01120,ko01200,map00680,map01120,map01200		NC_013156.1	198235	198675
WP_015790781.1	CO dehydrogenase/acetyl-CoA synthase complex subunit epsilon	GCF_000023985.1	WP_015790782.1	A	TRUE	C	COG1880@1|root,arCOG04408@2157|Archaea,2XZG7@28890|Euryarchaeota,23R6S@183939|Methanococci	PFAM CO dehydrogenase beta subunit acetyl-CoA synthase epsilon subunit	One carbon pool	ko00680,ko01120,ko01200,map00680,map01120,map01200		NC_013156.1	198235	198675
WP_015790782.1	CO dehydrogenase/acetyl-CoA synthase complex subunit alpha	GCF_000023985.1	WP_015790782.1	A	FALSE	unknown		unknown	CODH			NC_013156.1	198834	201158
WP_015733262.1	CO dehydrogenase/CO-methylating acetyl-CoA synthase complex subunit beta	GCF_000024625.1	WP_015733265.1	A	TRUE	C	COG1614@1|root,arCOG04360@2157|Archaea,2XU0D@28890|Euryarchaeota,23Q7P@183939|Methanococci	Part of a complex that catalyzes the reversible cleavage of acetyl-CoA, allowing autotrophic growth from CO(2). The alpha- epsilon complex generates CO from CO(2), while the beta subunit (this protein) combines the CO with CoA and a methyl group to form acetyl-CoA. The methyl group, which is incorporated into acetyl- CoA, is transferred to the beta subunit by a corrinoid iron-sulfur protein (the …	One carbon pool	ko00680,ko01120,ko01200,map00680,map01120,map01200	1.2.7.4	NC_013407.1	1166686	1168086
WP_015733262.1	CO dehydrogenase/CO-methylating acetyl-CoA synthase complex subunit beta	GCF_000024625.1	WP_015733265.1	A	TRUE	C	COG1614@1|root,arCOG04360@2157|Archaea,2XU0D@28890|Euryarchaeota,23Q7P@183939|Methanococci	Part of a complex that catalyzes the reversible cleavage of acetyl-CoA, allowing autotrophic growth from CO(2). The alpha- epsilon complex generates CO from CO(2), while the beta subunit (this protein) combines the CO with CoA and a methyl group to form acetyl-CoA. The methyl group, which is incorporated into acetyl- CoA, is transferred to the beta subunit by a corrinoid iron-sulfur protein (the …	One carbon pool	ko00680,ko01120,ko01200,map00680,map01120,map01200	1.2.7.4	NC_013407.1	1166686	1168086
WP_015733263.1	4Fe-4S dicluster domain-containing protein	GCF_000024625.1	WP_015733265.1	A	TRUE	C	COG1142@1|root,arCOG01502@2157|Archaea,2XXPM@28890|Euryarchaeota,23QVU@183939|Methanococci	PFAM 4Fe-4S ferredoxin, iron-sulfur binding domain protein	FeS			NC_013407.1	1168151	1168615
WP_015733264.1	CO dehydrogenase/acetyl-CoA synthase complex subunit epsilon	GCF_000024625.1	WP_015733265.1	A	TRUE	C	COG1880@1|root,arCOG04408@2157|Archaea,2XZG7@28890|Euryarchaeota,23R6S@183939|Methanococci	PFAM CO dehydrogenase beta subunit acetyl-CoA synthase epsilon subunit	One carbon pool	ko00680,ko01120,ko01200,map00680,map01120,map01200		NC_013407.1	1168619	1169059
WP_015733264.1	CO dehydrogenase/acetyl-CoA synthase complex subunit epsilon	GCF_000024625.1	WP_015733265.1	A	TRUE	C	COG1880@1|root,arCOG04408@2157|Archaea,2XZG7@28890|Euryarchaeota,23R6S@183939|Methanococci	PFAM CO dehydrogenase beta subunit acetyl-CoA synthase epsilon subunit	One carbon pool	ko00680,ko01120,ko01200,map00680,map01120,map01200		NC_013407.1	1168619	1169059
WP_015733265.1	CO dehydrogenase/acetyl-CoA synthase complex subunit alpha	GCF_000024625.1	WP_015733265.1	A	FALSE	unknown		unknown	CODH			NC_013407.1	1169089	1171413
WP_015733266.1	hypothetical protein	GCF_000024625.1	WP_015733265.1	A	TRUE	S	COG2425@1|root,arCOG00442@2157|Archaea,2Y0II@28890|Euryarchaeota,23RFT@183939|Methanococci	von Willebrand factor (vWF) type A domain	unknown			NC_013407.1	1171674	1172825
WP_015733267.1	armadillo/beta-catenin-like repeat-containing protein	GCF_000024625.1	WP_015733265.1	A	TRUE	unknown	arCOG08278@1|root,arCOG08278@2157|Archaea,2Y3TW@28890|Euryarchaeota,23RMU@183939|Methanococci	unknown	unknown			NC_013407.1	1172834	1173460
WP_015733268.1	AAA family ATPase	GCF_000024625.1	WP_015733265.1	A	TRUE	S	COG0714@1|root,arCOG00436@2157|Archaea,2XWN2@28890|Euryarchaeota,23RIV@183939|Methanococci	PFAM ATPase associated with various cellular activities AAA_5	CooC			NC_013407.1	1173450	1174580
WP_015733269.1	CopG family ribbon-helix-helix protein	GCF_000024625.1	WP_015733265.1	A	TRUE	K	COG0864@1|root,arCOG01008@2157|Archaea,2Y4IY@28890|Euryarchaeota,23RR6@183939|Methanococci	Transcriptional regulator NikR, CopG family	unknown			NC_013407.1	1174585	1174968
3	transposase	GCF_000025505.1	WP_012965244.1	A	TRUE	unknown		unknown	unknown			NC_013849.1	631029	631313
3	IS1 family transposase	GCF_000025505.1	WP_012965244.1	A	TRUE	unknown		unknown	unknown			NC_013849.1	631336	631728
WP_012965241.1	(Fe-S)-binding protein	GCF_000025505.1	WP_012965244.1	A	TRUE	C	COG1145@1|root,arCOG00292@2157|Archaea,2XXJH@28890|Euryarchaeota,2468F@183980|Archaeoglobi	formylmethanofuran dehydrogenase, subunit G	FeS	ko00680,ko01100,ko01120,ko01200,map00680,map01100,map01120,map01200		NC_013849.1	631803	632273
WP_048086770.1	formylmethanofuran dehydrogenase subunit B	GCF_000025505.1	WP_012965244.1	A	TRUE	C	COG1029@1|root,arCOG01498@2157|Archaea,2XTYT@28890|Euryarchaeota,246RM@183980|Archaeoglobi	Formylmethanofuran dehydrogenase, subunit B	unknown	ko00680,ko01100,ko01120,ko01200,map00680,map01100,map01120,map01200	1.2.7.12	NC_013849.1	632276	633478
WP_012965243.1	tungsten formylmethanofuran dehydrogenase subunit D (FwdD-1)	GCF_000025505.1	WP_012965244.1	A	TRUE	C	COG1153@1|root,arCOG02674@2157|Archaea,2Y496@28890|Euryarchaeota,24786@183980|Archaeoglobi	Molydopterin dinucleotide binding domain	unknown			NC_013849.1	633478	633873
WP_012965244.1	CO dehydrogenase/acetyl-CoA synthase complex subunit alpha	GCF_000025505.1	WP_012965244.1	A	FALSE	unknown		unknown	CODH			NC_013849.1	633979	636393
WP_012965245.1	CO dehydrogenase/acetyl-CoA synthase complex subunit epsilon	GCF_000025505.1	WP_012965244.1	A	TRUE	C	COG1880@1|root,arCOG04408@2157|Archaea,2XWPE@28890|Euryarchaeota,245XY@183980|Archaeoglobi	Part of a complex that catalyzes the reversible cleavage of acetyl-CoA, allowing autotrophic growth from CO(2). The alpha- epsilon subcomponent functions as a carbon monoxide dehydrogenase. The precise role of the epsilon subunit is unclear	One carbon pool	ko00680,ko01120,ko01200,map00680,map01120,map01200		NC_013849.1	636413	636958
WP_012965245.1	CO dehydrogenase/acetyl-CoA synthase complex subunit epsilon	GCF_000025505.1	WP_012965244.1	A	TRUE	C	COG1880@1|root,arCOG04408@2157|Archaea,2XWPE@28890|Euryarchaeota,245XY@183980|Archaeoglobi	Part of a complex that catalyzes the reversible cleavage of acetyl-CoA, allowing autotrophic growth from CO(2). The alpha- epsilon subcomponent functions as a carbon monoxide dehydrogenase. The precise role of the epsilon subunit is unclear	One carbon pool	ko00680,ko01120,ko01200,map00680,map01120,map01200		NC_013849.1	636413	636958
WP_012965246.1	CO dehydrogenase/CO-methylating acetyl-CoA synthase complex subunit beta	GCF_000025505.1	WP_012965244.1	A	TRUE	C	COG1614@1|root,arCOG04360@2157|Archaea,2XU0D@28890|Euryarchaeota,2462N@183980|Archaeoglobi	Part of a complex that catalyzes the reversible cleavage of acetyl-CoA, allowing autotrophic growth from CO(2). The alpha- epsilon complex generates CO from CO(2), while the beta subunit (this protein) combines the CO with CoA and a methyl group to form acetyl-CoA. The methyl group, which is incorporated into acetyl- CoA, is transferred to the beta subunit by a corrinoid iron-sulfur protein (the …	One carbon pool	ko00680,ko01120,ko01200,map00680,map01120,map01200		NC_013849.1	636969	638546
WP_012965246.1	CO dehydrogenase/CO-methylating acetyl-CoA synthase complex subunit beta	GCF_000025505.1	WP_012965244.1	A	TRUE	C	COG1614@1|root,arCOG04360@2157|Archaea,2XU0D@28890|Euryarchaeota,2462N@183980|Archaeoglobi	Part of a complex that catalyzes the reversible cleavage of acetyl-CoA, allowing autotrophic growth from CO(2). The alpha- epsilon complex generates CO from CO(2), while the beta subunit (this protein) combines the CO with CoA and a methyl group to form acetyl-CoA. The methyl group, which is incorporated into acetyl- CoA, is transferred to the beta subunit by a corrinoid iron-sulfur protein (the …	One carbon pool	ko00680,ko01120,ko01200,map00680,map01120,map01200		NC_013849.1	636969	638546
WP_012965247.1	AAA family ATPase	GCF_000025505.1	WP_012965244.1	A	TRUE	D	COG3640@1|root,arCOG00587@2157|Archaea,2XT61@28890|Euryarchaeota,245QG@183980|Archaeoglobi	AAA domain	CooC			NC_013849.1	638640	639413
WP_012965248.1	CO dehydrogenase/acetyl-CoA synthase subunit delta	GCF_000025505.1	WP_012965244.1	A	TRUE	C	COG2069@1|root,arCOG01980@2157|Archaea,2XTXS@28890|Euryarchaeota,245TW@183980|Archaeoglobi	Part of a complex that catalyzes the reversible cleavage of acetyl-CoA, allowing autotrophic growth from CO(2). Probably maintains the overall quaternary structure of the ACDS complex	One carbon pool	ko00680,ko00720,ko01120,ko01200,map00680,map00720,map01120,map01200	2.1.1.245	NC_013849.1	639420	640787
WP_012965248.1	CO dehydrogenase/acetyl-CoA synthase subunit delta	GCF_000025505.1	WP_012965244.1	A	TRUE	C	COG2069@1|root,arCOG01980@2157|Archaea,2XTXS@28890|Euryarchaeota,245TW@183980|Archaeoglobi	Part of a complex that catalyzes the reversible cleavage of acetyl-CoA, allowing autotrophic growth from CO(2). Probably maintains the overall quaternary structure of the ACDS complex	One carbon pool	ko00680,ko00720,ko01120,ko01200,map00680,map00720,map01120,map01200	2.1.1.245	NC_013849.1	639420	640787
WP_012965249.1	acetyl-CoA decarbonylase/synthase complex subunit gamma	GCF_000025505.1	WP_012965244.1	A	TRUE	H	COG1456@1|root,arCOG01979@2157|Archaea,2XUSG@28890|Euryarchaeota,245ZW@183980|Archaeoglobi	Part of a complex that catalyzes the reversible cleavage of acetyl-CoA, allowing autotrophic growth from CO(2)	One carbon pool	ko00680,ko00720,ko01120,ko01200,map00680,map00720,map01120,map01200	2.1.1.245	NC_013849.1	640791	642206
WP_012965249.1	acetyl-CoA decarbonylase/synthase complex subunit gamma	GCF_000025505.1	WP_012965244.1	A	TRUE	H	COG1456@1|root,arCOG01979@2157|Archaea,2XUSG@28890|Euryarchaeota,245ZW@183980|Archaeoglobi	Part of a complex that catalyzes the reversible cleavage of acetyl-CoA, allowing autotrophic growth from CO(2)	One carbon pool	ko00680,ko00720,ko01120,ko01200,map00680,map00720,map01120,map01200	2.1.1.245	NC_013849.1	640791	642206
WP_012965250.1	threonine synthase	GCF_000025505.1	WP_012965244.1	A	TRUE	E	COG0498@1|root,arCOG01434@2157|Archaea,2XT84@28890|Euryarchaeota,245XI@183980|Archaeoglobi	Catalyzes the gamma-elimination of phosphate from L- phosphohomoserine and the beta-addition of water to produce L- threonine	unknown	ko00260,ko00750,ko01100,ko01110,ko01120,ko01230,map00260,map00750,map01100,map01110,map01120,map01230	4.2.3.1	NC_013849.1	642230	643396
WP_013037613.1	CO dehydrogenase/acetyl-CoA synthase complex subunit alpha	GCF_000025865.1	WP_013037613.1	A	FALSE	unknown		unknown	CODH			NC_014002.1	1178621	1181026
WP_013037614.1	CO dehydrogenase/acetyl-CoA synthase complex subunit epsilon	GCF_000025865.1	WP_013037613.1	A	TRUE	C	COG1880@1|root,arCOG04408@2157|Archaea,2XWPE@28890|Euryarchaeota,2NA4Z@224756|Methanomicrobia	Part of a complex that catalyzes the reversible cleavage of acetyl-CoA, allowing growth on acetate as sole source of carbon and energy. The alpha-epsilon subcomponent functions as a carbon monoxide dehydrogenase. The precise role of the epsilon subunit is unclear	One carbon pool	ko00680,ko01120,ko01200,map00680,map01120,map01200		NC_014002.1	1181030	1181542
WP_013037614.1	CO dehydrogenase/acetyl-CoA synthase complex subunit epsilon	GCF_000025865.1	WP_013037613.1	A	TRUE	C	COG1880@1|root,arCOG04408@2157|Archaea,2XWPE@28890|Euryarchaeota,2NA4Z@224756|Methanomicrobia	Part of a complex that catalyzes the reversible cleavage of acetyl-CoA, allowing growth on acetate as sole source of carbon and energy. The alpha-epsilon subcomponent functions as a carbon monoxide dehydrogenase. The precise role of the epsilon subunit is unclear	One carbon pool	ko00680,ko01120,ko01200,map00680,map01120,map01200		NC_014002.1	1181030	1181542
WP_013037615.1	CO dehydrogenase/CO-methylating acetyl-CoA synthase complex subunit beta	GCF_000025865.1	WP_013037613.1	A	TRUE	C	COG1614@1|root,arCOG04360@2157|Archaea,2XU0D@28890|Euryarchaeota,2N95I@224756|Methanomicrobia	Part of a complex that catalyzes the reversible cleavage of acetyl-CoA, allowing growth on acetate as sole source of carbon and energy. The alpha-epsilon complex generates CO from CO(2), while the beta subunit (this protein) combines the CO with CoA and a methyl group to form acetyl-CoA. The methyl group, which is incorporated into acetyl-CoA, is transferred to the beta subunit by a corrinoid iro…	One carbon pool	ko00680,ko01120,ko01200,map00680,map01120,map01200		NC_014002.1	1181568	1182965
WP_013037615.1	CO dehydrogenase/CO-methylating acetyl-CoA synthase complex subunit beta	GCF_000025865.1	WP_013037613.1	A	TRUE	C	COG1614@1|root,arCOG04360@2157|Archaea,2XU0D@28890|Euryarchaeota,2N95I@224756|Methanomicrobia	Part of a complex that catalyzes the reversible cleavage of acetyl-CoA, allowing growth on acetate as sole source of carbon and energy. The alpha-epsilon complex generates CO from CO(2), while the beta subunit (this protein) combines the CO with CoA and a methyl group to form acetyl-CoA. The methyl group, which is incorporated into acetyl-CoA, is transferred to the beta subunit by a corrinoid iro…	One carbon pool	ko00680,ko01120,ko01200,map00680,map01120,map01200		NC_014002.1	1181568	1182965
WP_013037616.1	AAA family ATPase	GCF_000025865.1	WP_013037613.1	A	TRUE	D	COG3640@1|root,arCOG00587@2157|Archaea,2XT61@28890|Euryarchaeota,2N9QI@224756|Methanomicrobia	AAA domain	CooC			NC_014002.1	1182981	1183736
WP_013037617.1	CO dehydrogenase/acetyl-CoA synthase subunit delta	GCF_000025865.1	WP_013037613.1	A	TRUE	C	COG2069@1|root,arCOG01980@2157|Archaea,2XTXS@28890|Euryarchaeota,2N93F@224756|Methanomicrobia	Part of a complex that catalyzes the reversible cleavage of acetyl-CoA, allowing	One carbon pool	ko00680,ko00720,ko01120,ko01200,map00680,map00720,map01120,map01200	2.1.1.245	NC_014002.1	1183759	1185078
WP_013037617.1	CO dehydrogenase/acetyl-CoA synthase subunit delta	GCF_000025865.1	WP_013037613.1	A	TRUE	C	COG2069@1|root,arCOG01980@2157|Archaea,2XTXS@28890|Euryarchaeota,2N93F@224756|Methanomicrobia	Part of a complex that catalyzes the reversible cleavage of acetyl-CoA, allowing	One carbon pool	ko00680,ko00720,ko01120,ko01200,map00680,map00720,map01120,map01200	2.1.1.245	NC_014002.1	1183759	1185078
WP_013037618.1	acetyl-CoA decarbonylase/synthase complex subunit gamma	GCF_000025865.1	WP_013037613.1	A	TRUE	C	COG1456@1|root,arCOG01979@2157|Archaea,2XUSG@28890|Euryarchaeota,2N9BD@224756|Methanomicrobia	Part of a complex that catalyzes the reversible cleavage of acetyl-CoA, allowing	One carbon pool	ko00680,ko00720,ko01120,ko01200,map00680,map00720,map01120,map01200	2.1.1.245	NC_014002.1	1185080	1186492
WP_013037618.1	acetyl-CoA decarbonylase/synthase complex subunit gamma	GCF_000025865.1	WP_013037613.1	A	TRUE	C	COG1456@1|root,arCOG01979@2157|Archaea,2XUSG@28890|Euryarchaeota,2N9BD@224756|Methanomicrobia	Part of a complex that catalyzes the reversible cleavage of acetyl-CoA, allowing	One carbon pool	ko00680,ko00720,ko01120,ko01200,map00680,map00720,map01120,map01200	2.1.1.245	NC_014002.1	1185080	1186492
WP_013037619.1	DUF362 domain-containing protein	GCF_000025865.1	WP_013037613.1	A	TRUE	C	COG2768@1|root,arCOG02448@2157|Archaea,2XW30@28890|Euryarchaeota,2N9AE@224756|Methanomicrobia	PFAM 4Fe-4S ferredoxin, iron-sulfur binding domain protein	FeS			NC_014002.1	1186573	1187682
WP_013037620.1	aspartate-semialdehyde dehydrogenase	GCF_000025865.1	WP_013037613.1	A	TRUE	E	COG0136@1|root,COG0136@2|Bacteria,1MUHG@1224|Proteobacteria,2TSRD@28211|Alphaproteobacteria,2JQDF@204441|Rhodospirillales	Catalyzes the NADPH-dependent formation of L-aspartate- semialdehyde (L-ASA) by the reductive dephosphorylation of L- aspartyl-4-phosphate	unknown	ko00260,ko00261,ko00270,ko00300,ko01100,ko01110,ko01120,ko01130,ko01210,ko01230,map00260,map00261,map00270,map00300,map01100,map01110,map01120,map01130,map01210,map01230	1.2.1.11	NC_014002.1	1187889	1188890
WP_012037075.1	AAA family ATPase	GCF_000063445.1	WP_012037082.1	A	TRUE	D	COG3640@1|root,arCOG00587@2157|Archaea,2XT61@28890|Euryarchaeota,2N9QI@224756|Methanomicrobia	AAA domain	CooC			NC_009464.1	2831489	2832253
WP_012037076.1	AAA family ATPase	GCF_000063445.1	WP_012037082.1	A	TRUE	D	COG3640@1|root,arCOG00587@2157|Archaea,2XW7J@28890|Euryarchaeota,2N9VV@224756|Methanomicrobia	PFAM Cobyrinic acid a,c-diamide synthase	CooC			NC_009464.1	2832250	2833068
WP_052309994.1	ASKHA domain-containing protein	GCF_000063445.1	WP_012037082.1	A	TRUE	C	COG3894@1|root,arCOG02035@2157|Archaea,2XVBE@28890|Euryarchaeota,2NAG7@224756|Methanomicrobia	2Fe-2S iron-sulfur cluster binding domain	One carbon pool			NC_009464.1	2833096	2834973
WP_052309994.1	ASKHA domain-containing protein	GCF_000063445.1	WP_012037082.1	A	TRUE	C	COG3894@1|root,arCOG02035@2157|Archaea,2XVBE@28890|Euryarchaeota,2NAG7@224756|Methanomicrobia	2Fe-2S iron-sulfur cluster binding domain	One carbon pool			NC_009464.1	2833096	2834973
WP_052309995.1	acetyl-CoA decarbonylase/synthase complex subunit gamma	GCF_000063445.1	WP_012037082.1	A	TRUE	C	COG1456@1|root,arCOG01979@2157|Archaea,2XUSG@28890|Euryarchaeota,2N9BD@224756|Methanomicrobia	Part of a complex that catalyzes the reversible cleavage of acetyl-CoA, allowing	One carbon pool	ko00680,ko00720,ko01120,ko01200,map00680,map00720,map01120,map01200	2.1.1.245	NC_009464.1	2834957	2836408
WP_052309995.1	acetyl-CoA decarbonylase/synthase complex subunit gamma	GCF_000063445.1	WP_012037082.1	A	TRUE	C	COG1456@1|root,arCOG01979@2157|Archaea,2XUSG@28890|Euryarchaeota,2N9BD@224756|Methanomicrobia	Part of a complex that catalyzes the reversible cleavage of acetyl-CoA, allowing	One carbon pool	ko00680,ko00720,ko01120,ko01200,map00680,map00720,map01120,map01200	2.1.1.245	NC_009464.1	2834957	2836408
WP_012037079.1	CO dehydrogenase/acetyl-CoA synthase subunit delta	GCF_000063445.1	WP_012037082.1	A	TRUE	C	COG2069@1|root,arCOG01980@2157|Archaea,2XTXS@28890|Euryarchaeota,2N93F@224756|Methanomicrobia	Part of a complex that catalyzes the reversible cleavage of acetyl-CoA, allowing	One carbon pool	ko00680,ko00720,ko01120,ko01200,map00680,map00720,map01120,map01200	2.1.1.245	NC_009464.1	2836424	2837674
WP_012037079.1	CO dehydrogenase/acetyl-CoA synthase subunit delta	GCF_000063445.1	WP_012037082.1	A	TRUE	C	COG2069@1|root,arCOG01980@2157|Archaea,2XTXS@28890|Euryarchaeota,2N93F@224756|Methanomicrobia	Part of a complex that catalyzes the reversible cleavage of acetyl-CoA, allowing	One carbon pool	ko00680,ko00720,ko01120,ko01200,map00680,map00720,map01120,map01200	2.1.1.245	NC_009464.1	2836424	2837674
WP_012037080.1	CO dehydrogenase/CO-methylating acetyl-CoA synthase complex subunit beta	GCF_000063445.1	WP_012037082.1	A	TRUE	C	COG1614@1|root,arCOG04360@2157|Archaea,2XU0D@28890|Euryarchaeota,2N95I@224756|Methanomicrobia	Part of a complex that catalyzes the reversible cleavage of acetyl-CoA, allowing growth on acetate as sole source of carbon and energy. The alpha-epsilon complex generates CO from CO(2), while the beta subunit (this protein) combines the CO with CoA and a methyl group to form acetyl-CoA. The methyl group, which is incorporated into acetyl-CoA, is transferred to the beta subunit by a corrinoid iro…	One carbon pool	ko00680,ko01120,ko01200,map00680,map01120,map01200		NC_009464.1	2837676	2839076
WP_012037080.1	CO dehydrogenase/CO-methylating acetyl-CoA synthase complex subunit beta	GCF_000063445.1	WP_012037082.1	A	TRUE	C	COG1614@1|root,arCOG04360@2157|Archaea,2XU0D@28890|Euryarchaeota,2N95I@224756|Methanomicrobia	Part of a complex that catalyzes the reversible cleavage of acetyl-CoA, allowing growth on acetate as sole source of carbon and energy. The alpha-epsilon complex generates CO from CO(2), while the beta subunit (this protein) combines the CO with CoA and a methyl group to form acetyl-CoA. The methyl group, which is incorporated into acetyl-CoA, is transferred to the beta subunit by a corrinoid iro…	One carbon pool	ko00680,ko01120,ko01200,map00680,map01120,map01200		NC_009464.1	2837676	2839076
WP_012037081.1	CO dehydrogenase/acetyl-CoA synthase complex subunit epsilon	GCF_000063445.1	WP_012037082.1	A	TRUE	C	COG1880@1|root,arCOG04408@2157|Archaea,2XWPE@28890|Euryarchaeota,2NA4Z@224756|Methanomicrobia	Part of a complex that catalyzes the reversible cleavage of acetyl-CoA, allowing growth on acetate as sole source of carbon and energy. The alpha-epsilon subcomponent functions as a carbon monoxide dehydrogenase. The precise role of the epsilon subunit is unclear	One carbon pool	ko00680,ko01120,ko01200,map00680,map01120,map01200		NC_009464.1	2839082	2839621
WP_012037081.1	CO dehydrogenase/acetyl-CoA synthase complex subunit epsilon	GCF_000063445.1	WP_012037082.1	A	TRUE	C	COG1880@1|root,arCOG04408@2157|Archaea,2XWPE@28890|Euryarchaeota,2NA4Z@224756|Methanomicrobia	Part of a complex that catalyzes the reversible cleavage of acetyl-CoA, allowing growth on acetate as sole source of carbon and energy. The alpha-epsilon subcomponent functions as a carbon monoxide dehydrogenase. The precise role of the epsilon subunit is unclear	One carbon pool	ko00680,ko01120,ko01200,map00680,map01120,map01200		NC_009464.1	2839082	2839621
WP_012037082.1	CO dehydrogenase/acetyl-CoA synthase complex subunit alpha	GCF_000063445.1	WP_012037082.1	A	FALSE	unknown		unknown	CODH			NC_009464.1	2839681	2842002
WP_064496407.1	V4R domain-containing protein	GCF_000091665.1	WP_010869648.1	A	TRUE	K	COG1719@1|root,arCOG01688@2157|Archaea	PFAM 4-vinyl reductase, 4VR	Regulation			NC_000909.1	146082	146588
WP_010869646.1	HTH-type transcriptional regulator Ptr1	GCF_000091665.1	WP_010869648.1	A	TRUE	K	COG1522@1|root,arCOG01580@2157|Archaea,2XWVQ@28890|Euryarchaeota	COG1522 Transcriptional regulators	unknown			NC_000909.1	146593	147039
WP_083774537.1	acetyl-CoA decarbonylase/synthase complex subunit alpha/beta	GCF_000091665.1	WP_010869648.1	A	TRUE	C	COG1152@1|root,COG1614@1|root,arCOG02428@2157|Archaea,arCOG04360@2157|Archaea,2XU0D@28890|Euryarchaeota,23Q7P@183939|Methanococci	Part of a complex that catalyzes the reversible cleavage of acetyl-CoA, allowing autotrophic growth from CO(2). The alpha- epsilon complex generates CO from CO(2), while the beta subunit (this protein) combines the CO with CoA and a methyl group to form acetyl-CoA. The methyl group, which is incorporated into acetyl- CoA, is transferred to the beta subunit by a corrinoid iron-sulfur protein (the …	One carbon pool	ko00680,ko01120,ko01200,map00680,map01120,map01200	1.2.7.4	NC_000909.1	147323	149542
WP_083774537.1	acetyl-CoA decarbonylase/synthase complex subunit alpha/beta	GCF_000091665.1	WP_010869648.1	A	TRUE	C	COG1152@1|root,COG1614@1|root,arCOG02428@2157|Archaea,arCOG04360@2157|Archaea,2XU0D@28890|Euryarchaeota,23Q7P@183939|Methanococci	Part of a complex that catalyzes the reversible cleavage of acetyl-CoA, allowing autotrophic growth from CO(2). The alpha- epsilon complex generates CO from CO(2), while the beta subunit (this protein) combines the CO with CoA and a methyl group to form acetyl-CoA. The methyl group, which is incorporated into acetyl- CoA, is transferred to the beta subunit by a corrinoid iron-sulfur protein (the …	One carbon pool	ko00680,ko01120,ko01200,map00680,map01120,map01200	1.2.7.4	NC_000909.1	147323	149542
WP_010869648.1	CO dehydrogenase/acetyl-CoA synthase complex subunit alpha	GCF_000091665.1	WP_010869648.1	A	FALSE	unknown		unknown	CODH			NC_000909.1	149782	152106
WP_010869649.1	CO dehydrogenase/acetyl-CoA synthase complex subunit epsilon	GCF_000091665.1	WP_010869648.1	A	TRUE	C	COG1880@1|root,arCOG04408@2157|Archaea,2XZG7@28890|Euryarchaeota,23R6S@183939|Methanococci	PFAM CO dehydrogenase beta subunit acetyl-CoA synthase epsilon subunit	One carbon pool	ko00680,ko01120,ko01200,map00680,map01120,map01200		NC_000909.1	152150	152590
WP_010869649.1	CO dehydrogenase/acetyl-CoA synthase complex subunit epsilon	GCF_000091665.1	WP_010869648.1	A	TRUE	C	COG1880@1|root,arCOG04408@2157|Archaea,2XZG7@28890|Euryarchaeota,23R6S@183939|Methanococci	PFAM CO dehydrogenase beta subunit acetyl-CoA synthase epsilon subunit	One carbon pool	ko00680,ko01120,ko01200,map00680,map01120,map01200		NC_000909.1	152150	152590
WP_010869650.1	4Fe-4S dicluster domain-containing protein	GCF_000091665.1	WP_010869648.1	A	TRUE	C	COG1142@1|root,arCOG01502@2157|Archaea,2XXPM@28890|Euryarchaeota,23QVU@183939|Methanococci	PFAM 4Fe-4S ferredoxin, iron-sulfur binding domain protein	FeS			NC_000909.1	152592	153047
WP_010869651.1	CO dehydrogenase/CO-methylating acetyl-CoA synthase complex subunit beta	GCF_000091665.1	WP_010869648.1	A	TRUE	C	COG1614@1|root,arCOG04360@2157|Archaea,2XU0D@28890|Euryarchaeota,23Q7P@183939|Methanococci	Part of a complex that catalyzes the reversible cleavage of acetyl-CoA, allowing autotrophic growth from CO(2). The alpha- epsilon complex generates CO from CO(2), while the beta subunit (this protein) combines the CO with CoA and a methyl group to form acetyl-CoA. The methyl group, which is incorporated into acetyl- CoA, is transferred to the beta subunit by a corrinoid iron-sulfur protein (the …	One carbon pool	ko00680,ko01120,ko01200,map00680,map01120,map01200	1.2.7.4	NC_000909.1	153070	154479
WP_010869651.1	CO dehydrogenase/CO-methylating acetyl-CoA synthase complex subunit beta	GCF_000091665.1	WP_010869648.1	A	TRUE	C	COG1614@1|root,arCOG04360@2157|Archaea,2XU0D@28890|Euryarchaeota,23Q7P@183939|Methanococci	Part of a complex that catalyzes the reversible cleavage of acetyl-CoA, allowing autotrophic growth from CO(2). The alpha- epsilon complex generates CO from CO(2), while the beta subunit (this protein) combines the CO with CoA and a methyl group to form acetyl-CoA. The methyl group, which is incorporated into acetyl- CoA, is transferred to the beta subunit by a corrinoid iron-sulfur protein (the …	One carbon pool	ko00680,ko01120,ko01200,map00680,map01120,map01200	1.2.7.4	NC_000909.1	153070	154479
WP_013100433.1	CO dehydrogenase/acetyl-CoA synthase complex subunit alpha	GCF_000092305.1	WP_013100433.1	A	FALSE	unknown		unknown	CODH			NC_014122.1	928944	931220
WP_013866906.1	bifunctional acetyl-CoA decarbonylase/synthase complex subunit alpha/beta	GCF_000179575.2	WP_013866909.1	A	TRUE	C	COG1152@1|root,COG1614@1|root,arCOG02428@2157|Archaea,arCOG04360@2157|Archaea,2XU0D@28890|Euryarchaeota,23Q7P@183939|Methanococci	Part of a complex that catalyzes the reversible cleavage of acetyl-CoA, allowing autotrophic growth from CO(2). The alpha- epsilon complex generates CO from CO(2), while the beta subunit (this protein) combines the CO with CoA and a methyl group to form acetyl-CoA. The methyl group, which is incorporated into acetyl- CoA, is transferred to the beta subunit by a corrinoid iron-sulfur protein (the …	One carbon pool	ko00680,ko01120,ko01200,map00680,map01120,map01200	1.2.7.4	NC_015636.1	771248	771412
WP_013866906.1	bifunctional acetyl-CoA decarbonylase/synthase complex subunit alpha/beta	GCF_000179575.2	WP_013866909.1	A	TRUE	C	COG1152@1|root,COG1614@1|root,arCOG02428@2157|Archaea,arCOG04360@2157|Archaea,2XU0D@28890|Euryarchaeota,23Q7P@183939|Methanococci	Part of a complex that catalyzes the reversible cleavage of acetyl-CoA, allowing autotrophic growth from CO(2). The alpha- epsilon complex generates CO from CO(2), while the beta subunit (this protein) combines the CO with CoA and a methyl group to form acetyl-CoA. The methyl group, which is incorporated into acetyl- CoA, is transferred to the beta subunit by a corrinoid iron-sulfur protein (the …	One carbon pool	ko00680,ko01120,ko01200,map00680,map01120,map01200	1.2.7.4	NC_015636.1	771248	771412
WP_013866907.1	4Fe-4S dicluster domain-containing protein	GCF_000179575.2	WP_013866909.1	A	TRUE	C	COG1142@1|root,arCOG01502@2157|Archaea,2XXPM@28890|Euryarchaeota,23QVU@183939|Methanococci	PFAM 4Fe-4S ferredoxin, iron-sulfur binding domain protein	FeS			NC_015636.1	771636	772091
WP_013866908.1	carbon monoxide dehydrogenase beta subunit family protein	GCF_000179575.2	WP_013866909.1	A	TRUE	C	COG1880@1|root,arCOG04408@2157|Archaea,2XZG7@28890|Euryarchaeota,23R6S@183939|Methanococci	PFAM CO dehydrogenase beta subunit acetyl-CoA synthase epsilon subunit	One carbon pool	ko00680,ko01120,ko01200,map00680,map01120,map01200		NC_015636.1	772109	772546
WP_013866908.1	carbon monoxide dehydrogenase beta subunit family protein	GCF_000179575.2	WP_013866909.1	A	TRUE	C	COG1880@1|root,arCOG04408@2157|Archaea,2XZG7@28890|Euryarchaeota,23R6S@183939|Methanococci	PFAM CO dehydrogenase beta subunit acetyl-CoA synthase epsilon subunit	One carbon pool	ko00680,ko01120,ko01200,map00680,map01120,map01200		NC_015636.1	772109	772546
WP_013866909.1	CO dehydrogenase/acetyl-CoA synthase complex subunit alpha	GCF_000179575.2	WP_013866909.1	A	FALSE	unknown		unknown	CODH			NC_015636.1	772673	774997
WP_013644063.1	CpaF family protein	GCF_000191585.1	WP_013644065.1	A	TRUE	U	COG4962@1|root,arCOG01819@2157|Archaea,2Y8F5@28890|Euryarchaeota,23NT6@183925|Methanobacteria	secretion system protein	unknown			NC_015216.1	439097	440722
WP_013644064.1	type II secretion system F family protein	GCF_000191585.1	WP_013644065.1	A	TRUE	N	COG2064@1|root,arCOG01812@2157|Archaea,2Y780@28890|Euryarchaeota,23P2D@183925|Methanobacteria	type II secretion	unknown			NC_015216.1	440781	441896
WP_013644065.1	CO dehydrogenase/acetyl-CoA synthase complex subunit alpha	GCF_000191585.1	WP_013644065.1	A	FALSE	unknown		unknown	CODH			NC_015216.1	442108	444453
WP_013644066.1	CO dehydrogenase/acetyl-CoA synthase complex subunit epsilon	GCF_000191585.1	WP_013644065.1	A	TRUE	C	COG1880@1|root,arCOG04408@2157|Archaea,2XWPE@28890|Euryarchaeota	Part of a complex that catalyzes the reversible cleavage of acetyl-CoA, allowing autotrophic growth from CO(2). The alpha- epsilon subcomponent functions as a carbon monoxide dehydrogenase. The precise role of the epsilon subunit is unclear	One carbon pool	ko00680,ko01120,ko01200,map00680,map01120,map01200		NC_015216.1	444455	444967
WP_013644066.1	CO dehydrogenase/acetyl-CoA synthase complex subunit epsilon	GCF_000191585.1	WP_013644065.1	A	TRUE	C	COG1880@1|root,arCOG04408@2157|Archaea,2XWPE@28890|Euryarchaeota	Part of a complex that catalyzes the reversible cleavage of acetyl-CoA, allowing autotrophic growth from CO(2). The alpha- epsilon subcomponent functions as a carbon monoxide dehydrogenase. The precise role of the epsilon subunit is unclear	One carbon pool	ko00680,ko01120,ko01200,map00680,map01120,map01200		NC_015216.1	444455	444967
WP_013644067.1	CO dehydrogenase/CO-methylating acetyl-CoA synthase complex subunit beta	GCF_000191585.1	WP_013644065.1	A	TRUE	C	COG1614@1|root,arCOG04360@2157|Archaea,2XU0D@28890|Euryarchaeota	Part of a complex that catalyzes the reversible cleavage of acetyl-CoA, allowing autotrophic growth from CO(2). The alpha- epsilon complex generates CO from CO(2), while the beta subunit (this protein) combines the CO with CoA and a methyl group to form acetyl-CoA. The methyl group, which is incorporated into acetyl- CoA, is transferred to the beta subunit by a corrinoid iron-sulfur protein (the …	One carbon pool	ko00680,ko01120,ko01200,map00680,map01120,map01200	1.2.7.4	NC_015216.1	445020	446426
WP_013644067.1	CO dehydrogenase/CO-methylating acetyl-CoA synthase complex subunit beta	GCF_000191585.1	WP_013644065.1	A	TRUE	C	COG1614@1|root,arCOG04360@2157|Archaea,2XU0D@28890|Euryarchaeota	Part of a complex that catalyzes the reversible cleavage of acetyl-CoA, allowing autotrophic growth from CO(2). The alpha- epsilon complex generates CO from CO(2), while the beta subunit (this protein) combines the CO with CoA and a methyl group to form acetyl-CoA. The methyl group, which is incorporated into acetyl- CoA, is transferred to the beta subunit by a corrinoid iron-sulfur protein (the …	One carbon pool	ko00680,ko01120,ko01200,map00680,map01120,map01200	1.2.7.4	NC_015216.1	445020	446426
WP_013644068.1	AAA family ATPase	GCF_000191585.1	WP_013644065.1	A	TRUE	D	COG3640@1|root,arCOG00587@2157|Archaea,2XT61@28890|Euryarchaeota	PFAM Cobyrinic acid a,c-diamide synthase	CooC			NC_015216.1	446456	447208
WP_013644069.1	CO dehydrogenase/acetyl-CoA synthase subunit delta	GCF_000191585.1	WP_013644065.1	A	TRUE	C	COG2069@1|root,arCOG01980@2157|Archaea,2XTXS@28890|Euryarchaeota	Part of a complex that catalyzes the reversible cleavage of acetyl-CoA, allowing autotrophic growth from CO(2). Probably maintains the overall quaternary structure of the ACDS complex	One carbon pool	ko00680,ko00720,ko01120,ko01200,map00680,map00720,map01120,map01200	2.1.1.245	NC_015216.1	447226	448386
WP_013644069.1	CO dehydrogenase/acetyl-CoA synthase subunit delta	GCF_000191585.1	WP_013644065.1	A	TRUE	C	COG2069@1|root,arCOG01980@2157|Archaea,2XTXS@28890|Euryarchaeota	Part of a complex that catalyzes the reversible cleavage of acetyl-CoA, allowing autotrophic growth from CO(2). Probably maintains the overall quaternary structure of the ACDS complex	One carbon pool	ko00680,ko00720,ko01120,ko01200,map00680,map00720,map01120,map01200	2.1.1.245	NC_015216.1	447226	448386
WP_013644070.1	acetyl-CoA decarbonylase/synthase complex subunit gamma	GCF_000191585.1	WP_013644065.1	A	TRUE	H	COG1456@1|root,arCOG01979@2157|Archaea,2XUSG@28890|Euryarchaeota	Part of a complex that catalyzes the reversible cleavage of acetyl-CoA, allowing autotrophic growth from CO(2)	One carbon pool	ko00680,ko00720,ko01120,ko01200,map00680,map00720,map01120,map01200	2.1.1.245	NC_015216.1	448400	449788
WP_013644070.1	acetyl-CoA decarbonylase/synthase complex subunit gamma	GCF_000191585.1	WP_013644065.1	A	TRUE	H	COG1456@1|root,arCOG01979@2157|Archaea,2XUSG@28890|Euryarchaeota	Part of a complex that catalyzes the reversible cleavage of acetyl-CoA, allowing autotrophic growth from CO(2)	One carbon pool	ko00680,ko00720,ko01120,ko01200,map00680,map00720,map01120,map01200	2.1.1.245	NC_015216.1	448400	449788
WP_013644071.1	4Fe-4S dicluster domain-containing protein	GCF_000191585.1	WP_013644065.1	A	TRUE	C	COG1142@1|root,arCOG01502@2157|Archaea,2XXN1@28890|Euryarchaeota	PFAM 4Fe-4S ferredoxin, iron-sulfur binding domain protein	FeS			NC_015216.1	449827	450297
WP_052302969.1	4Fe-4S dicluster domain-containing protein	GCF_000194625.1	WP_013683795.1	A	TRUE	C	COG2048@1|root,arCOG00964@2157|Archaea	heterodisulfide reductase subunit C	FeS	ko00564,ko00680,ko01100,ko01110,ko01120,ko01200,map00564,map00680,map01100,map01110,map01120,map01200	1.1.5.3,1.8.7.3,1.8.98.4,1.8.98.5,1.8.98.6	NC_015320.1	972205	972627
WP_013683794.1	CoB--CoM heterodisulfide reductase iron-sulfur subunit B family protein	GCF_000194625.1	WP_013683795.1	A	TRUE	C	COG2048@1|root,arCOG00338@2157|Archaea,2XTWJ@28890|Euryarchaeota	Heterodisulfide reductase, subunit B	FeS	ko00020,ko00190,ko00650,ko00680,ko00720,ko01100,ko01110,ko01120,ko01130,ko01200,map00020,map00190,map00650,map00680,map00720,map01100,map01110,map01120,map01130,map01200	1.8.7.3,1.8.98.4,1.8.98.5,1.8.98.6	NC_015320.1	972620	973411
WP_013683795.1	CO dehydrogenase/acetyl-CoA synthase complex subunit alpha	GCF_000194625.1	WP_013683795.1	A	FALSE	unknown		unknown	CODH			NC_015320.1	973569	975962
WP_013683796.1	CO dehydrogenase/acetyl-CoA synthase complex subunit epsilon	GCF_000194625.1	WP_013683795.1	A	TRUE	C	COG1880@1|root,arCOG04408@2157|Archaea,2XWPE@28890|Euryarchaeota,245XY@183980|Archaeoglobi	Part of a complex that catalyzes the reversible cleavage of acetyl-CoA, allowing autotrophic growth from CO(2). The alpha- epsilon subcomponent functions as a carbon monoxide dehydrogenase. The precise role of the epsilon subunit is unclear	One carbon pool	ko00680,ko01120,ko01200,map00680,map01120,map01200		NC_015320.1	975967	976533
WP_013683796.1	CO dehydrogenase/acetyl-CoA synthase complex subunit epsilon	GCF_000194625.1	WP_013683795.1	A	TRUE	C	COG1880@1|root,arCOG04408@2157|Archaea,2XWPE@28890|Euryarchaeota,245XY@183980|Archaeoglobi	Part of a complex that catalyzes the reversible cleavage of acetyl-CoA, allowing autotrophic growth from CO(2). The alpha- epsilon subcomponent functions as a carbon monoxide dehydrogenase. The precise role of the epsilon subunit is unclear	One carbon pool	ko00680,ko01120,ko01200,map00680,map01120,map01200		NC_015320.1	975967	976533
WP_013683797.1	CO dehydrogenase/CO-methylating acetyl-CoA synthase complex subunit beta	GCF_000194625.1	WP_013683795.1	A	TRUE	C	COG1614@1|root,arCOG04360@2157|Archaea,2XU0D@28890|Euryarchaeota,2462N@183980|Archaeoglobi	Part of a complex that catalyzes the reversible cleavage of acetyl-CoA, allowing autotrophic growth from CO(2). The alpha- epsilon complex generates CO from CO(2), while the beta subunit (this protein) combines the CO with CoA and a methyl group to form acetyl-CoA. The methyl group, which is incorporated into acetyl- CoA, is transferred to the beta subunit by a corrinoid iron-sulfur protein (the …	One carbon pool	ko00680,ko01120,ko01200,map00680,map01120,map01200		NC_015320.1	976514	978019
WP_013683797.1	CO dehydrogenase/CO-methylating acetyl-CoA synthase complex subunit beta	GCF_000194625.1	WP_013683795.1	A	TRUE	C	COG1614@1|root,arCOG04360@2157|Archaea,2XU0D@28890|Euryarchaeota,2462N@183980|Archaeoglobi	Part of a complex that catalyzes the reversible cleavage of acetyl-CoA, allowing autotrophic growth from CO(2). The alpha- epsilon complex generates CO from CO(2), while the beta subunit (this protein) combines the CO with CoA and a methyl group to form acetyl-CoA. The methyl group, which is incorporated into acetyl- CoA, is transferred to the beta subunit by a corrinoid iron-sulfur protein (the …	One carbon pool	ko00680,ko01120,ko01200,map00680,map01120,map01200		NC_015320.1	976514	978019
WP_013683798.1	AAA family ATPase	GCF_000194625.1	WP_013683795.1	A	TRUE	D	COG3640@1|root,arCOG00587@2157|Archaea,2XT61@28890|Euryarchaeota,245QG@183980|Archaeoglobi	AAA domain	CooC			NC_015320.1	978034	978777
WP_013683799.1	CO dehydrogenase/acetyl-CoA synthase subunit delta	GCF_000194625.1	WP_013683795.1	A	TRUE	C	COG2069@1|root,arCOG01980@2157|Archaea,2XTXS@28890|Euryarchaeota,245TW@183980|Archaeoglobi	Part of a complex that catalyzes the reversible cleavage of acetyl-CoA, allowing autotrophic growth from CO(2). Probably maintains the overall quaternary structure of the ACDS complex	One carbon pool	ko00680,ko00720,ko01120,ko01200,map00680,map00720,map01120,map01200	2.1.1.245	NC_015320.1	978761	980029
WP_013683799.1	CO dehydrogenase/acetyl-CoA synthase subunit delta	GCF_000194625.1	WP_013683795.1	A	TRUE	C	COG2069@1|root,arCOG01980@2157|Archaea,2XTXS@28890|Euryarchaeota,245TW@183980|Archaeoglobi	Part of a complex that catalyzes the reversible cleavage of acetyl-CoA, allowing autotrophic growth from CO(2). Probably maintains the overall quaternary structure of the ACDS complex	One carbon pool	ko00680,ko00720,ko01120,ko01200,map00680,map00720,map01120,map01200	2.1.1.245	NC_015320.1	978761	980029
WP_013683800.1	acetyl-CoA decarbonylase/synthase complex subunit gamma	GCF_000194625.1	WP_013683795.1	A	TRUE	H	COG1456@1|root,arCOG01979@2157|Archaea,2XUSG@28890|Euryarchaeota,245ZW@183980|Archaeoglobi	Part of a complex that catalyzes the reversible cleavage of acetyl-CoA, allowing autotrophic growth from CO(2)	One carbon pool	ko00680,ko00720,ko01120,ko01200,map00680,map00720,map01120,map01200	2.1.1.245	NC_015320.1	980026	981426
WP_013683800.1	acetyl-CoA decarbonylase/synthase complex subunit gamma	GCF_000194625.1	WP_013683795.1	A	TRUE	H	COG1456@1|root,arCOG01979@2157|Archaea,2XUSG@28890|Euryarchaeota,245ZW@183980|Archaeoglobi	Part of a complex that catalyzes the reversible cleavage of acetyl-CoA, allowing autotrophic growth from CO(2)	One carbon pool	ko00680,ko00720,ko01120,ko01200,map00680,map00720,map01120,map01200	2.1.1.245	NC_015320.1	980026	981426
ARCVE_RS11745	nucleotidyltransferase family protein	GCF_000194625.1	WP_013683795.1	A	TRUE	unknown		unknown	unknown			NC_015320.1	981606	981847
WP_013193904.1	60S ribosomal export protein NMD3	GCF_000196655.1	WP_013193912.1	A	TRUE	J	COG1499@1|root,arCOG04149@2157|Archaea,2XUAI@28890|Euryarchaeota,2N9GP@224756|Methanomicrobia	pfam nmd3	unknown	ko03008,ko03013,map03008,map03013		NC_014253.1	408198	409241
WP_049890877.1	hypothetical protein	GCF_000196655.1	WP_013193912.1	A	TRUE	unknown		unknown	unknown			NC_014253.1	409291	409530
WP_013193906.1	DUF362 domain-containing protein	GCF_000196655.1	WP_013193912.1	A	TRUE	C	COG2768@1|root,arCOG02448@2157|Archaea,2XW30@28890|Euryarchaeota,2N9AE@224756|Methanomicrobia	PFAM 4Fe-4S ferredoxin, iron-sulfur binding domain protein	FeS			NC_014253.1	409677	410738
WP_013193907.1	acetyl-CoA decarbonylase/synthase complex subunit gamma	GCF_000196655.1	WP_013193912.1	A	TRUE	C	COG1456@1|root,arCOG01979@2157|Archaea,2XUSG@28890|Euryarchaeota,2N9BD@224756|Methanomicrobia	Part of a complex that catalyzes the reversible cleavage of acetyl-CoA, allowing	One carbon pool	ko00680,ko00720,ko01120,ko01200,map00680,map00720,map01120,map01200	2.1.1.245	NC_014253.1	410854	412263
WP_013193907.1	acetyl-CoA decarbonylase/synthase complex subunit gamma	GCF_000196655.1	WP_013193912.1	A	TRUE	C	COG1456@1|root,arCOG01979@2157|Archaea,2XUSG@28890|Euryarchaeota,2N9BD@224756|Methanomicrobia	Part of a complex that catalyzes the reversible cleavage of acetyl-CoA, allowing	One carbon pool	ko00680,ko00720,ko01120,ko01200,map00680,map00720,map01120,map01200	2.1.1.245	NC_014253.1	410854	412263
WP_013193908.1	CO dehydrogenase/acetyl-CoA synthase subunit delta	GCF_000196655.1	WP_013193912.1	A	TRUE	C	COG2069@1|root,arCOG01980@2157|Archaea,2XTXS@28890|Euryarchaeota,2N93F@224756|Methanomicrobia	Part of a complex that catalyzes the reversible cleavage of acetyl-CoA, allowing	One carbon pool	ko00680,ko00720,ko01120,ko01200,map00680,map00720,map01120,map01200	2.1.1.245	NC_014253.1	412267	413595
WP_013193908.1	CO dehydrogenase/acetyl-CoA synthase subunit delta	GCF_000196655.1	WP_013193912.1	A	TRUE	C	COG2069@1|root,arCOG01980@2157|Archaea,2XTXS@28890|Euryarchaeota,2N93F@224756|Methanomicrobia	Part of a complex that catalyzes the reversible cleavage of acetyl-CoA, allowing	One carbon pool	ko00680,ko00720,ko01120,ko01200,map00680,map00720,map01120,map01200	2.1.1.245	NC_014253.1	412267	413595
WP_013193909.1	AAA family ATPase	GCF_000196655.1	WP_013193912.1	A	TRUE	D	COG3640@1|root,arCOG00587@2157|Archaea,2XT61@28890|Euryarchaeota,2N9QI@224756|Methanomicrobia	AAA domain	CooC			NC_014253.1	413679	414431
WP_013193910.1	CO dehydrogenase/CO-methylating acetyl-CoA synthase complex subunit beta	GCF_000196655.1	WP_013193912.1	A	TRUE	C	COG1614@1|root,arCOG04360@2157|Archaea,2XU0D@28890|Euryarchaeota,2N95I@224756|Methanomicrobia	Part of a complex that catalyzes the reversible cleavage of acetyl-CoA, allowing growth on acetate as sole source of carbon and energy. The alpha-epsilon complex generates CO from CO(2), while the beta subunit (this protein) combines the CO with CoA and a methyl group to form acetyl-CoA. The methyl group, which is incorporated into acetyl-CoA, is transferred to the beta subunit by a corrinoid iro…	One carbon pool	ko00680,ko01120,ko01200,map00680,map01120,map01200		NC_014253.1	414457	415866
WP_013193910.1	CO dehydrogenase/CO-methylating acetyl-CoA synthase complex subunit beta	GCF_000196655.1	WP_013193912.1	A	TRUE	C	COG1614@1|root,arCOG04360@2157|Archaea,2XU0D@28890|Euryarchaeota,2N95I@224756|Methanomicrobia	Part of a complex that catalyzes the reversible cleavage of acetyl-CoA, allowing growth on acetate as sole source of carbon and energy. The alpha-epsilon complex generates CO from CO(2), while the beta subunit (this protein) combines the CO with CoA and a methyl group to form acetyl-CoA. The methyl group, which is incorporated into acetyl-CoA, is transferred to the beta subunit by a corrinoid iro…	One carbon pool	ko00680,ko01120,ko01200,map00680,map01120,map01200		NC_014253.1	414457	415866
WP_013193911.1	CO dehydrogenase/acetyl-CoA synthase complex subunit epsilon	GCF_000196655.1	WP_013193912.1	A	TRUE	C	COG1880@1|root,arCOG04408@2157|Archaea,2XWPE@28890|Euryarchaeota,2NA4Z@224756|Methanomicrobia	Part of a complex that catalyzes the reversible cleavage of acetyl-CoA, allowing growth on acetate as sole source of carbon and energy. The alpha-epsilon subcomponent functions as a carbon monoxide dehydrogenase. The precise role of the epsilon subunit is unclear	One carbon pool	ko00680,ko01120,ko01200,map00680,map01120,map01200		NC_014253.1	415889	416404
WP_013193911.1	CO dehydrogenase/acetyl-CoA synthase complex subunit epsilon	GCF_000196655.1	WP_013193912.1	A	TRUE	C	COG1880@1|root,arCOG04408@2157|Archaea,2XWPE@28890|Euryarchaeota,2NA4Z@224756|Methanomicrobia	Part of a complex that catalyzes the reversible cleavage of acetyl-CoA, allowing growth on acetate as sole source of carbon and energy. The alpha-epsilon subcomponent functions as a carbon monoxide dehydrogenase. The precise role of the epsilon subunit is unclear	One carbon pool	ko00680,ko01120,ko01200,map00680,map01120,map01200		NC_014253.1	415889	416404
WP_013193912.1	CO dehydrogenase/acetyl-CoA synthase complex subunit alpha	GCF_000196655.1	WP_013193912.1	A	FALSE	unknown		unknown	CODH			NC_014253.1	416408	418813
WP_013826436.1	4Fe-4S dicluster domain-containing protein	GCF_000214725.1	WP_013826442.1	A	TRUE	C	COG1142@1|root,arCOG01502@2157|Archaea,2XXN1@28890|Euryarchaeota	PFAM 4Fe-4S ferredoxin, iron-sulfur binding domain protein	FeS			NC_015574.1	2023723	2024190
WP_013826437.1	acetyl-CoA decarbonylase/synthase complex subunit gamma	GCF_000214725.1	WP_013826442.1	A	TRUE	H	COG1456@1|root,arCOG01979@2157|Archaea,2XUSG@28890|Euryarchaeota	Part of a complex that catalyzes the reversible cleavage of acetyl-CoA, allowing autotrophic growth from CO(2)	One carbon pool	ko00680,ko00720,ko01120,ko01200,map00680,map00720,map01120,map01200	2.1.1.245	NC_015574.1	2024248	2025627
WP_013826437.1	acetyl-CoA decarbonylase/synthase complex subunit gamma	GCF_000214725.1	WP_013826442.1	A	TRUE	H	COG1456@1|root,arCOG01979@2157|Archaea,2XUSG@28890|Euryarchaeota	Part of a complex that catalyzes the reversible cleavage of acetyl-CoA, allowing autotrophic growth from CO(2)	One carbon pool	ko00680,ko00720,ko01120,ko01200,map00680,map00720,map01120,map01200	2.1.1.245	NC_015574.1	2024248	2025627
WP_013826438.1	CO dehydrogenase/acetyl-CoA synthase subunit delta	GCF_000214725.1	WP_013826442.1	A	TRUE	C	COG2069@1|root,arCOG01980@2157|Archaea,2XTXS@28890|Euryarchaeota	Part of a complex that catalyzes the reversible cleavage of acetyl-CoA, allowing autotrophic growth from CO(2). Probably maintains the overall quaternary structure of the ACDS complex	One carbon pool	ko00680,ko00720,ko01120,ko01200,map00680,map00720,map01120,map01200	2.1.1.245	NC_015574.1	2025646	2026815
WP_013826438.1	CO dehydrogenase/acetyl-CoA synthase subunit delta	GCF_000214725.1	WP_013826442.1	A	TRUE	C	COG2069@1|root,arCOG01980@2157|Archaea,2XTXS@28890|Euryarchaeota	Part of a complex that catalyzes the reversible cleavage of acetyl-CoA, allowing autotrophic growth from CO(2). Probably maintains the overall quaternary structure of the ACDS complex	One carbon pool	ko00680,ko00720,ko01120,ko01200,map00680,map00720,map01120,map01200	2.1.1.245	NC_015574.1	2025646	2026815
WP_013826439.1	AAA family ATPase	GCF_000214725.1	WP_013826442.1	A	TRUE	D	COG3640@1|root,arCOG00587@2157|Archaea,2XT61@28890|Euryarchaeota	PFAM Cobyrinic acid a,c-diamide synthase	CooC			NC_015574.1	2026828	2027586
WP_013826440.1	CO dehydrogenase/CO-methylating acetyl-CoA synthase complex subunit beta	GCF_000214725.1	WP_013826442.1	A	TRUE	C	COG1614@1|root,arCOG04360@2157|Archaea,2XU0D@28890|Euryarchaeota	Part of a complex that catalyzes the reversible cleavage of acetyl-CoA, allowing autotrophic growth from CO(2). The alpha- epsilon complex generates CO from CO(2), while the beta subunit (this protein) combines the CO with CoA and a methyl group to form acetyl-CoA. The methyl group, which is incorporated into acetyl- CoA, is transferred to the beta subunit by a corrinoid iron-sulfur protein (the …	One carbon pool	ko00680,ko01120,ko01200,map00680,map01120,map01200	1.2.7.4	NC_015574.1	2027731	2029128
WP_013826440.1	CO dehydrogenase/CO-methylating acetyl-CoA synthase complex subunit beta	GCF_000214725.1	WP_013826442.1	A	TRUE	C	COG1614@1|root,arCOG04360@2157|Archaea,2XU0D@28890|Euryarchaeota	Part of a complex that catalyzes the reversible cleavage of acetyl-CoA, allowing autotrophic growth from CO(2). The alpha- epsilon complex generates CO from CO(2), while the beta subunit (this protein) combines the CO with CoA and a methyl group to form acetyl-CoA. The methyl group, which is incorporated into acetyl- CoA, is transferred to the beta subunit by a corrinoid iron-sulfur protein (the …	One carbon pool	ko00680,ko01120,ko01200,map00680,map01120,map01200	1.2.7.4	NC_015574.1	2027731	2029128
WP_013826441.1	CO dehydrogenase/acetyl-CoA synthase complex subunit epsilon	GCF_000214725.1	WP_013826442.1	A	TRUE	C	COG1880@1|root,arCOG04408@2157|Archaea,2XWPE@28890|Euryarchaeota	Part of a complex that catalyzes the reversible cleavage of acetyl-CoA, allowing autotrophic growth from CO(2). The alpha- epsilon subcomponent functions as a carbon monoxide dehydrogenase. The precise role of the epsilon subunit is unclear	One carbon pool	ko00680,ko01120,ko01200,map00680,map01120,map01200		NC_015574.1	2029288	2029803
WP_013826441.1	CO dehydrogenase/acetyl-CoA synthase complex subunit epsilon	GCF_000214725.1	WP_013826442.1	A	TRUE	C	COG1880@1|root,arCOG04408@2157|Archaea,2XWPE@28890|Euryarchaeota	Part of a complex that catalyzes the reversible cleavage of acetyl-CoA, allowing autotrophic growth from CO(2). The alpha- epsilon subcomponent functions as a carbon monoxide dehydrogenase. The precise role of the epsilon subunit is unclear	One carbon pool	ko00680,ko01120,ko01200,map00680,map01120,map01200		NC_015574.1	2029288	2029803
WP_013826442.1	CO dehydrogenase/acetyl-CoA synthase complex subunit alpha	GCF_000214725.1	WP_013826442.1	A	FALSE	unknown		unknown	CODH			NC_015574.1	2029824	2032175
WP_013898425.1	acetyl-CoA decarbonylase/synthase complex subunit gamma	GCF_000217995.1	WP_013898430.1	A	TRUE	C	COG1456@1|root,arCOG01979@2157|Archaea,2XUSG@28890|Euryarchaeota,2N9BD@224756|Methanomicrobia	Part of a complex that catalyzes the reversible cleavage of acetyl-CoA, allowing	One carbon pool	ko00680,ko00720,ko01120,ko01200,map00680,map00720,map01120,map01200	2.1.1.245	NC_015676.1	1238893	1240299
WP_013898425.1	acetyl-CoA decarbonylase/synthase complex subunit gamma	GCF_000217995.1	WP_013898430.1	A	TRUE	C	COG1456@1|root,arCOG01979@2157|Archaea,2XUSG@28890|Euryarchaeota,2N9BD@224756|Methanomicrobia	Part of a complex that catalyzes the reversible cleavage of acetyl-CoA, allowing	One carbon pool	ko00680,ko00720,ko01120,ko01200,map00680,map00720,map01120,map01200	2.1.1.245	NC_015676.1	1238893	1240299
WP_013898426.1	CO dehydrogenase/acetyl-CoA synthase subunit delta	GCF_000217995.1	WP_013898430.1	A	TRUE	C	COG2069@1|root,arCOG01980@2157|Archaea,2XTXS@28890|Euryarchaeota,2N93F@224756|Methanomicrobia	Part of a complex that catalyzes the reversible cleavage of acetyl-CoA, allowing	One carbon pool	ko00680,ko00720,ko01120,ko01200,map00680,map00720,map01120,map01200	2.1.1.245	NC_015676.1	1240303	1241640
WP_013898426.1	CO dehydrogenase/acetyl-CoA synthase subunit delta	GCF_000217995.1	WP_013898430.1	A	TRUE	C	COG2069@1|root,arCOG01980@2157|Archaea,2XTXS@28890|Euryarchaeota,2N93F@224756|Methanomicrobia	Part of a complex that catalyzes the reversible cleavage of acetyl-CoA, allowing	One carbon pool	ko00680,ko00720,ko01120,ko01200,map00680,map00720,map01120,map01200	2.1.1.245	NC_015676.1	1240303	1241640
WP_013898427.1	AAA family ATPase	GCF_000217995.1	WP_013898430.1	A	TRUE	D	COG3640@1|root,arCOG00587@2157|Archaea,2XT61@28890|Euryarchaeota,2N9QI@224756|Methanomicrobia	AAA domain	CooC			NC_015676.1	1241688	1242440
WP_048815656.1	CO dehydrogenase/CO-methylating acetyl-CoA synthase complex subunit beta	GCF_000217995.1	WP_013898430.1	A	TRUE	C	COG1614@1|root,arCOG04360@2157|Archaea,2XU0D@28890|Euryarchaeota,2N95I@224756|Methanomicrobia	Part of a complex that catalyzes the reversible cleavage of acetyl-CoA, allowing growth on acetate as sole source of carbon and energy. The alpha-epsilon complex generates CO from CO(2), while the beta subunit (this protein) combines the CO with CoA and a methyl group to form acetyl-CoA. The methyl group, which is incorporated into acetyl-CoA, is transferred to the beta subunit by a corrinoid iro…	One carbon pool	ko00680,ko01120,ko01200,map00680,map01120,map01200		NC_015676.1	1242457	1243893
WP_048815656.1	CO dehydrogenase/CO-methylating acetyl-CoA synthase complex subunit beta	GCF_000217995.1	WP_013898430.1	A	TRUE	C	COG1614@1|root,arCOG04360@2157|Archaea,2XU0D@28890|Euryarchaeota,2N95I@224756|Methanomicrobia	Part of a complex that catalyzes the reversible cleavage of acetyl-CoA, allowing growth on acetate as sole source of carbon and energy. The alpha-epsilon complex generates CO from CO(2), while the beta subunit (this protein) combines the CO with CoA and a methyl group to form acetyl-CoA. The methyl group, which is incorporated into acetyl-CoA, is transferred to the beta subunit by a corrinoid iro…	One carbon pool	ko00680,ko01120,ko01200,map00680,map01120,map01200		NC_015676.1	1242457	1243893
WP_048815505.1	CO dehydrogenase/acetyl-CoA synthase complex subunit epsilon	GCF_000217995.1	WP_013898430.1	A	TRUE	C	COG1880@1|root,arCOG04408@2157|Archaea,2XWPE@28890|Euryarchaeota,2NA4Z@224756|Methanomicrobia	Part of a complex that catalyzes the reversible cleavage of acetyl-CoA, allowing growth on acetate as sole source of carbon and energy. The alpha-epsilon subcomponent functions as a carbon monoxide dehydrogenase. The precise role of the epsilon subunit is unclear	One carbon pool	ko00680,ko01120,ko01200,map00680,map01120,map01200		NC_015676.1	1243922	1244431
WP_048815505.1	CO dehydrogenase/acetyl-CoA synthase complex subunit epsilon	GCF_000217995.1	WP_013898430.1	A	TRUE	C	COG1880@1|root,arCOG04408@2157|Archaea,2XWPE@28890|Euryarchaeota,2NA4Z@224756|Methanomicrobia	Part of a complex that catalyzes the reversible cleavage of acetyl-CoA, allowing growth on acetate as sole source of carbon and energy. The alpha-epsilon subcomponent functions as a carbon monoxide dehydrogenase. The precise role of the epsilon subunit is unclear	One carbon pool	ko00680,ko01120,ko01200,map00680,map01120,map01200		NC_015676.1	1243922	1244431
WP_013898430.1	CO dehydrogenase/acetyl-CoA synthase complex subunit alpha	GCF_000217995.1	WP_013898430.1	A	FALSE	unknown		unknown	CODH			NC_015676.1	1244434	1246845
WP_013999435.1	CooT family nickel-binding protein	GCF_000220645.1	WP_013999442.1	A	TRUE	S	COG1532@1|root,arCOG04856@2157|Archaea,2Y1J2@28890|Euryarchaeota,23RQN@183939|Methanococci	Predicted RNA-binding protein	CooT			NC_015847.1	1058147	1058326
WP_013999436.1	4Fe-4S dicluster domain-containing protein	GCF_000220645.1	WP_013999442.1	A	TRUE	C	COG1142@1|root,arCOG01502@2157|Archaea,2XXN1@28890|Euryarchaeota,23RU7@183939|Methanococci	PFAM 4Fe-4S ferredoxin, iron-sulfur binding domain protein	FeS			NC_015847.1	1058431	1058895
WP_013999437.1	acetyl-CoA decarbonylase/synthase complex subunit gamma	GCF_000220645.1	WP_013999442.1	A	TRUE	H	COG1456@1|root,arCOG01979@2157|Archaea,2XUSG@28890|Euryarchaeota,23QH9@183939|Methanococci	Part of a complex that catalyzes the reversible cleavage of acetyl-CoA, allowing autotrophic growth from CO(2)	One carbon pool	ko00680,ko00720,ko01120,ko01200,map00680,map00720,map01120,map01200	2.1.1.245	NC_015847.1	1058900	1060273
WP_013999437.1	acetyl-CoA decarbonylase/synthase complex subunit gamma	GCF_000220645.1	WP_013999442.1	A	TRUE	H	COG1456@1|root,arCOG01979@2157|Archaea,2XUSG@28890|Euryarchaeota,23QH9@183939|Methanococci	Part of a complex that catalyzes the reversible cleavage of acetyl-CoA, allowing autotrophic growth from CO(2)	One carbon pool	ko00680,ko00720,ko01120,ko01200,map00680,map00720,map01120,map01200	2.1.1.245	NC_015847.1	1058900	1060273
WP_013999438.1	CO dehydrogenase/acetyl-CoA synthase subunit delta	GCF_000220645.1	WP_013999442.1	A	TRUE	C	COG2069@1|root,arCOG01980@2157|Archaea,2XTXS@28890|Euryarchaeota,23QDU@183939|Methanococci	Part of a complex that catalyzes the reversible cleavage of acetyl-CoA, allowing autotrophic growth from CO(2). Probably maintains the overall quaternary structure of the ACDS complex	One carbon pool	ko00680,ko00720,ko01120,ko01200,map00680,map00720,map01120,map01200	2.1.1.245	NC_015847.1	1060287	1061441
WP_013999438.1	CO dehydrogenase/acetyl-CoA synthase subunit delta	GCF_000220645.1	WP_013999442.1	A	TRUE	C	COG2069@1|root,arCOG01980@2157|Archaea,2XTXS@28890|Euryarchaeota,23QDU@183939|Methanococci	Part of a complex that catalyzes the reversible cleavage of acetyl-CoA, allowing autotrophic growth from CO(2). Probably maintains the overall quaternary structure of the ACDS complex	One carbon pool	ko00680,ko00720,ko01120,ko01200,map00680,map00720,map01120,map01200	2.1.1.245	NC_015847.1	1060287	1061441
WP_013999439.1	AAA family ATPase	GCF_000220645.1	WP_013999442.1	A	TRUE	D	COG3640@1|root,arCOG00587@2157|Archaea,2XT61@28890|Euryarchaeota,23QPT@183939|Methanococci	PFAM Cobyrinic acid a,c-diamide synthase	CooC			NC_015847.1	1061456	1062208
WP_013999440.1	CO dehydrogenase/CO-methylating acetyl-CoA synthase complex subunit beta	GCF_000220645.1	WP_013999442.1	A	TRUE	C	COG1614@1|root,arCOG04360@2157|Archaea,2XU0D@28890|Euryarchaeota,23Q7P@183939|Methanococci	Part of a complex that catalyzes the reversible cleavage of acetyl-CoA, allowing autotrophic growth from CO(2). The alpha- epsilon complex generates CO from CO(2), while the beta subunit (this protein) combines the CO with CoA and a methyl group to form acetyl-CoA. The methyl group, which is incorporated into acetyl- CoA, is transferred to the beta subunit by a corrinoid iron-sulfur protein (the …	One carbon pool	ko00680,ko01120,ko01200,map00680,map01120,map01200	1.2.7.4	NC_015847.1	1062219	1063592
WP_013999440.1	CO dehydrogenase/CO-methylating acetyl-CoA synthase complex subunit beta	GCF_000220645.1	WP_013999442.1	A	TRUE	C	COG1614@1|root,arCOG04360@2157|Archaea,2XU0D@28890|Euryarchaeota,23Q7P@183939|Methanococci	Part of a complex that catalyzes the reversible cleavage of acetyl-CoA, allowing autotrophic growth from CO(2). The alpha- epsilon complex generates CO from CO(2), while the beta subunit (this protein) combines the CO with CoA and a methyl group to form acetyl-CoA. The methyl group, which is incorporated into acetyl- CoA, is transferred to the beta subunit by a corrinoid iron-sulfur protein (the …	One carbon pool	ko00680,ko01120,ko01200,map00680,map01120,map01200	1.2.7.4	NC_015847.1	1062219	1063592
WP_013999441.1	CO dehydrogenase/acetyl-CoA synthase complex subunit epsilon	GCF_000220645.1	WP_013999442.1	A	TRUE	C	COG1880@1|root,arCOG04408@2157|Archaea,2XWPE@28890|Euryarchaeota,23R5P@183939|Methanococci	Part of a complex that catalyzes the reversible cleavage of acetyl-CoA, allowing autotrophic growth from CO(2). The alpha- epsilon subcomponent functions as a carbon monoxide dehydrogenase. The precise role of the epsilon subunit is unclear	One carbon pool	ko00680,ko01120,ko01200,map00680,map01120,map01200		NC_015847.1	1063604	1064122
WP_013999441.1	CO dehydrogenase/acetyl-CoA synthase complex subunit epsilon	GCF_000220645.1	WP_013999442.1	A	TRUE	C	COG1880@1|root,arCOG04408@2157|Archaea,2XWPE@28890|Euryarchaeota,23R5P@183939|Methanococci	Part of a complex that catalyzes the reversible cleavage of acetyl-CoA, allowing autotrophic growth from CO(2). The alpha- epsilon subcomponent functions as a carbon monoxide dehydrogenase. The precise role of the epsilon subunit is unclear	One carbon pool	ko00680,ko01120,ko01200,map00680,map01120,map01200		NC_015847.1	1063604	1064122
WP_013999442.1	CO dehydrogenase/acetyl-CoA synthase complex subunit alpha	GCF_000220645.1	WP_013999442.1	A	FALSE	unknown		unknown	CODH			NC_015847.1	1064132	1066471
WP_013999443.1	DUF166 domain-containing protein	GCF_000220645.1	WP_013999442.1	A	TRUE	S	COG1245@1|root,COG1810@1|root,arCOG00187@2157|Archaea,arCOG02468@2157|Archaea,2XU42@28890|Euryarchaeota,23R65@183939|Methanococci	Domain of unknown function	unknown	ko00240,ko00670,ko01100,ko01523,map00240,map00670,map01100,map01523	2.1.1.45	NC_015847.1	1066627	1067499
WP_011972125.1	16S rRNA (adenine(1518)-N(6)/adenine(1519)-N(6))-dimethyltransferase RsmA	GCF_000220645.1	WP_013999442.1	A	TRUE	J	COG0030@1|root,arCOG04131@2157|Archaea,2XU1Q@28890|Euryarchaeota,23QM5@183939|Methanococci	Specifically dimethylates two adjacent adenosines in the loop of a conserved hairpin near the 3'-end of 16S rRNA in the 30S particle. May play a critical role in biogenesis of 30S subunits	unknown		2.1.1.182	NC_015847.1	1067527	1068330
WP_013999444.1	RsmD family RNA methyltransferase	GCF_000220645.1	WP_013999442.1	A	TRUE	J	arCOG01220@1|root,arCOG01220@2157|Archaea,2XYGI@28890|Euryarchaeota,23QP3@183939|Methanococci	Conserved hypothetical protein 95	unknown			NC_015847.1	1068342	1069229
WP_013999445.1	DNA topoisomerase VI subunit B	GCF_000220645.1	WP_013999442.1	A	TRUE	L	COG1389@1|root,arCOG01165@2157|Archaea,2XTZQ@28890|Euryarchaeota,23PZW@183939|Methanococci	Relaxes both positive and negative superturns and exhibits a strong decatenase activity	unknown		5.99.1.3	NC_015847.1	1069371	1071365
WP_014587849.1	acetyl-CoA decarbonylase/synthase complex subunit gamma	GCF_000235565.1	WP_014587855.1	A	TRUE	C	COG1456@1|root,arCOG01979@2157|Archaea,2XUSG@28890|Euryarchaeota,2N9BD@224756|Methanomicrobia	Part of a complex that catalyzes the reversible cleavage of acetyl-CoA, allowing	One carbon pool	ko00680,ko00720,ko01120,ko01200,map00680,map00720,map01120,map01200	2.1.1.245	NC_017527.1	2485000	2486424
WP_014587849.1	acetyl-CoA decarbonylase/synthase complex subunit gamma	GCF_000235565.1	WP_014587855.1	A	TRUE	C	COG1456@1|root,arCOG01979@2157|Archaea,2XUSG@28890|Euryarchaeota,2N9BD@224756|Methanomicrobia	Part of a complex that catalyzes the reversible cleavage of acetyl-CoA, allowing	One carbon pool	ko00680,ko00720,ko01120,ko01200,map00680,map00720,map01120,map01200	2.1.1.245	NC_017527.1	2485000	2486424
WP_014587850.1	CO dehydrogenase/acetyl-CoA synthase subunit delta	GCF_000235565.1	WP_014587855.1	A	TRUE	C	COG2069@1|root,arCOG01980@2157|Archaea,2XTXS@28890|Euryarchaeota,2N93F@224756|Methanomicrobia	Part of a complex that catalyzes the reversible cleavage of acetyl-CoA, allowing	One carbon pool	ko00680,ko00720,ko01120,ko01200,map00680,map00720,map01120,map01200	2.1.1.245	NC_017527.1	2486430	2487782
WP_014587850.1	CO dehydrogenase/acetyl-CoA synthase subunit delta	GCF_000235565.1	WP_014587855.1	A	TRUE	C	COG2069@1|root,arCOG01980@2157|Archaea,2XTXS@28890|Euryarchaeota,2N93F@224756|Methanomicrobia	Part of a complex that catalyzes the reversible cleavage of acetyl-CoA, allowing	One carbon pool	ko00680,ko00720,ko01120,ko01200,map00680,map00720,map01120,map01200	2.1.1.245	NC_017527.1	2486430	2487782
WP_014587851.1	AAA family ATPase	GCF_000235565.1	WP_014587855.1	A	TRUE	D	COG3640@1|root,arCOG00587@2157|Archaea,2XT61@28890|Euryarchaeota,2N9QI@224756|Methanomicrobia	AAA domain	CooC			NC_017527.1	2487795	2488556
WP_143763418.1	hypothetical protein	GCF_000235565.1	WP_014587855.1	A	TRUE	unknown		unknown	unknown			NC_017527.1	2488575	2488778
2	hypothetical protein	GCF_000235565.1	WP_014587855.1	A	TRUE	unknown		unknown	unknown			NC_017527.1	2488895	2489089
WP_048144689.1	CO dehydrogenase/CO-methylating acetyl-CoA synthase complex subunit beta	GCF_000235565.1	WP_014587855.1	A	TRUE	C	COG1614@1|root,arCOG04360@2157|Archaea,2XU0D@28890|Euryarchaeota,2462N@183980|Archaeoglobi	Part of a complex that catalyzes the reversible cleavage of acetyl-CoA, allowing autotrophic growth from CO(2). The alpha- epsilon complex generates CO from CO(2), while the beta subunit (this protein) combines the CO with CoA and a methyl group to form acetyl-CoA. The methyl group, which is incorporated into acetyl- CoA, is transferred to the beta subunit by a corrinoid iron-sulfur protein (the …	One carbon pool	ko00680,ko01120,ko01200,map00680,map01120,map01200		NC_017527.1	2489135	2490541
WP_048144689.1	CO dehydrogenase/CO-methylating acetyl-CoA synthase complex subunit beta	GCF_000235565.1	WP_014587855.1	A	TRUE	C	COG1614@1|root,arCOG04360@2157|Archaea,2XU0D@28890|Euryarchaeota,2462N@183980|Archaeoglobi	Part of a complex that catalyzes the reversible cleavage of acetyl-CoA, allowing autotrophic growth from CO(2). The alpha- epsilon complex generates CO from CO(2), while the beta subunit (this protein) combines the CO with CoA and a methyl group to form acetyl-CoA. The methyl group, which is incorporated into acetyl- CoA, is transferred to the beta subunit by a corrinoid iron-sulfur protein (the …	One carbon pool	ko00680,ko01120,ko01200,map00680,map01120,map01200		NC_017527.1	2489135	2490541
WP_014587854.1	CO dehydrogenase/acetyl-CoA synthase complex subunit epsilon	GCF_000235565.1	WP_014587855.1	A	TRUE	C	COG1880@1|root,arCOG04408@2157|Archaea,2XWPE@28890|Euryarchaeota	Part of a complex that catalyzes the reversible cleavage of acetyl-CoA, allowing autotrophic growth from CO(2). The alpha- epsilon subcomponent functions as a carbon monoxide dehydrogenase. The precise role of the epsilon subunit is unclear	One carbon pool	ko00680,ko01120,ko01200,map00680,map01120,map01200		NC_017527.1	2490581	2491126
WP_014587854.1	CO dehydrogenase/acetyl-CoA synthase complex subunit epsilon	GCF_000235565.1	WP_014587855.1	A	TRUE	C	COG1880@1|root,arCOG04408@2157|Archaea,2XWPE@28890|Euryarchaeota	Part of a complex that catalyzes the reversible cleavage of acetyl-CoA, allowing autotrophic growth from CO(2). The alpha- epsilon subcomponent functions as a carbon monoxide dehydrogenase. The precise role of the epsilon subunit is unclear	One carbon pool	ko00680,ko01120,ko01200,map00680,map01120,map01200		NC_017527.1	2490581	2491126
WP_014587855.1	CO dehydrogenase/acetyl-CoA synthase complex subunit alpha	GCF_000235565.1	WP_014587855.1	A	FALSE	unknown		unknown	CODH			NC_017527.1	2491140	2493575
WP_007045100.1	CO dehydrogenase/CO-methylating acetyl-CoA synthase complex subunit beta	GCF_000243455.1	WP_007045103.1	A	TRUE	C	COG1152@1|root,COG1614@1|root,arCOG02428@2157|Archaea,arCOG04360@2157|Archaea,2XU0D@28890|Euryarchaeota,23Q7P@183939|Methanococci	Part of a complex that catalyzes the reversible cleavage of acetyl-CoA, allowing autotrophic growth from CO(2). The alpha- epsilon complex generates CO from CO(2), while the beta subunit (this protein) combines the CO with CoA and a methyl group to form acetyl-CoA. The methyl group, which is incorporated into acetyl- CoA, is transferred to the beta subunit by a corrinoid iron-sulfur protein (the …	One carbon pool	ko00680,ko01120,ko01200,map00680,map01120,map01200	1.2.7.4	NZ_AGJL01000053.1	467	1864
WP_007045100.1	CO dehydrogenase/CO-methylating acetyl-CoA synthase complex subunit beta	GCF_000243455.1	WP_007045103.1	A	TRUE	C	COG1152@1|root,COG1614@1|root,arCOG02428@2157|Archaea,arCOG04360@2157|Archaea,2XU0D@28890|Euryarchaeota,23Q7P@183939|Methanococci	Part of a complex that catalyzes the reversible cleavage of acetyl-CoA, allowing autotrophic growth from CO(2). The alpha- epsilon complex generates CO from CO(2), while the beta subunit (this protein) combines the CO with CoA and a methyl group to form acetyl-CoA. The methyl group, which is incorporated into acetyl- CoA, is transferred to the beta subunit by a corrinoid iron-sulfur protein (the …	One carbon pool	ko00680,ko01120,ko01200,map00680,map01120,map01200	1.2.7.4	NZ_AGJL01000053.1	467	1864
WP_007045101.1	4Fe-4S dicluster domain-containing protein	GCF_000243455.1	WP_007045103.1	A	TRUE	C	COG1142@1|root,arCOG01502@2157|Archaea,2XXPM@28890|Euryarchaeota,23QVU@183939|Methanococci	PFAM 4Fe-4S ferredoxin, iron-sulfur binding domain protein	FeS			NZ_AGJL01000053.1	1879	2331
WP_007045102.1	CO dehydrogenase/acetyl-CoA synthase complex subunit epsilon	GCF_000243455.1	WP_007045103.1	A	TRUE	C	COG1880@1|root,arCOG04408@2157|Archaea,2XZG7@28890|Euryarchaeota,23R6S@183939|Methanococci	PFAM CO dehydrogenase beta subunit acetyl-CoA synthase epsilon subunit	One carbon pool	ko00680,ko01120,ko01200,map00680,map01120,map01200		NZ_AGJL01000053.1	2362	2796
WP_007045102.1	CO dehydrogenase/acetyl-CoA synthase complex subunit epsilon	GCF_000243455.1	WP_007045103.1	A	TRUE	C	COG1880@1|root,arCOG04408@2157|Archaea,2XZG7@28890|Euryarchaeota,23R6S@183939|Methanococci	PFAM CO dehydrogenase beta subunit acetyl-CoA synthase epsilon subunit	One carbon pool	ko00680,ko01120,ko01200,map00680,map01120,map01200		NZ_AGJL01000053.1	2362	2796
WP_007045103.1	CO dehydrogenase/acetyl-CoA synthase complex subunit alpha	GCF_000243455.1	WP_007045103.1	A	FALSE	unknown		unknown	CODH			NZ_AGJL01000053.1	2829	5138
WP_192812704.1	CO dehydrogenase/acetyl-CoA synthase complex subunit alpha	GCF_000302455.1	WP_192812704.1	A	FALSE	unknown		unknown	CODH			NZ_AMPO01000005.1	135394	137769
WP_004030695.1	CO dehydrogenase/acetyl-CoA synthase complex subunit epsilon	GCF_000302455.1	WP_192812704.1	A	TRUE	C	COG1880@1|root,arCOG04408@2157|Archaea,2XWPE@28890|Euryarchaeota	Part of a complex that catalyzes the reversible cleavage of acetyl-CoA, allowing autotrophic growth from CO(2). The alpha- epsilon subcomponent functions as a carbon monoxide dehydrogenase. The precise role of the epsilon subunit is unclear	One carbon pool	ko00680,ko01120,ko01200,map00680,map01120,map01200		NZ_AMPO01000005.1	137770	138288
WP_004030695.1	CO dehydrogenase/acetyl-CoA synthase complex subunit epsilon	GCF_000302455.1	WP_192812704.1	A	TRUE	C	COG1880@1|root,arCOG04408@2157|Archaea,2XWPE@28890|Euryarchaeota	Part of a complex that catalyzes the reversible cleavage of acetyl-CoA, allowing autotrophic growth from CO(2). The alpha- epsilon subcomponent functions as a carbon monoxide dehydrogenase. The precise role of the epsilon subunit is unclear	One carbon pool	ko00680,ko01120,ko01200,map00680,map01120,map01200		NZ_AMPO01000005.1	137770	138288
WP_004030696.1	CO dehydrogenase/CO-methylating acetyl-CoA synthase complex subunit beta	GCF_000302455.1	WP_192812704.1	A	TRUE	C	COG1614@1|root,arCOG04360@2157|Archaea,2XU0D@28890|Euryarchaeota	Part of a complex that catalyzes the reversible cleavage of acetyl-CoA, allowing autotrophic growth from CO(2). The alpha- epsilon complex generates CO from CO(2), while the beta subunit (this protein) combines the CO with CoA and a methyl group to form acetyl-CoA. The methyl group, which is incorporated into acetyl- CoA, is transferred to the beta subunit by a corrinoid iron-sulfur protein (the …	One carbon pool	ko00680,ko01120,ko01200,map00680,map01120,map01200	1.2.7.4	NZ_AMPO01000005.1	138485	139882
WP_004030696.1	CO dehydrogenase/CO-methylating acetyl-CoA synthase complex subunit beta	GCF_000302455.1	WP_192812704.1	A	TRUE	C	COG1614@1|root,arCOG04360@2157|Archaea,2XU0D@28890|Euryarchaeota	Part of a complex that catalyzes the reversible cleavage of acetyl-CoA, allowing autotrophic growth from CO(2). The alpha- epsilon complex generates CO from CO(2), while the beta subunit (this protein) combines the CO with CoA and a methyl group to form acetyl-CoA. The methyl group, which is incorporated into acetyl- CoA, is transferred to the beta subunit by a corrinoid iron-sulfur protein (the …	One carbon pool	ko00680,ko01120,ko01200,map00680,map01120,map01200	1.2.7.4	NZ_AMPO01000005.1	138485	139882
WP_004030697.1	AAA family ATPase	GCF_000302455.1	WP_192812704.1	A	TRUE	D	COG3640@1|root,arCOG00587@2157|Archaea,2XT61@28890|Euryarchaeota	PFAM Cobyrinic acid a,c-diamide synthase	CooC			NZ_AMPO01000005.1	140145	140897
WP_004030698.1	CO dehydrogenase/acetyl-CoA synthase subunit delta	GCF_000302455.1	WP_192812704.1	A	TRUE	C	COG2069@1|root,arCOG01980@2157|Archaea,2XTXS@28890|Euryarchaeota	Part of a complex that catalyzes the reversible cleavage of acetyl-CoA, allowing autotrophic growth from CO(2). Probably maintains the overall quaternary structure of the ACDS complex	One carbon pool	ko00680,ko00720,ko01120,ko01200,map00680,map00720,map01120,map01200	2.1.1.245	NZ_AMPO01000005.1	140914	142077
WP_004030698.1	CO dehydrogenase/acetyl-CoA synthase subunit delta	GCF_000302455.1	WP_192812704.1	A	TRUE	C	COG2069@1|root,arCOG01980@2157|Archaea,2XTXS@28890|Euryarchaeota	Part of a complex that catalyzes the reversible cleavage of acetyl-CoA, allowing autotrophic growth from CO(2). Probably maintains the overall quaternary structure of the ACDS complex	One carbon pool	ko00680,ko00720,ko01120,ko01200,map00680,map00720,map01120,map01200	2.1.1.245	NZ_AMPO01000005.1	140914	142077
WP_004030699.1	acetyl-CoA decarbonylase/synthase complex subunit gamma	GCF_000302455.1	WP_192812704.1	A	TRUE	H	COG1456@1|root,arCOG01979@2157|Archaea,2XUSG@28890|Euryarchaeota	Part of a complex that catalyzes the reversible cleavage of acetyl-CoA, allowing autotrophic growth from CO(2)	One carbon pool	ko00680,ko00720,ko01120,ko01200,map00680,map00720,map01120,map01200	2.1.1.245	NZ_AMPO01000005.1	142090	143481
WP_004030699.1	acetyl-CoA decarbonylase/synthase complex subunit gamma	GCF_000302455.1	WP_192812704.1	A	TRUE	H	COG1456@1|root,arCOG01979@2157|Archaea,2XUSG@28890|Euryarchaeota	Part of a complex that catalyzes the reversible cleavage of acetyl-CoA, allowing autotrophic growth from CO(2)	One carbon pool	ko00680,ko00720,ko01120,ko01200,map00680,map00720,map01120,map01200	2.1.1.245	NZ_AMPO01000005.1	142090	143481
WP_004030700.1	4Fe-4S dicluster domain-containing protein	GCF_000302455.1	WP_192812704.1	A	TRUE	C	COG1142@1|root,arCOG01502@2157|Archaea,2XXN1@28890|Euryarchaeota	PFAM 4Fe-4S ferredoxin, iron-sulfur binding domain protein	FeS			NZ_AMPO01000005.1	143592	144062
WP_015285704.1	PEGA domain-containing protein	GCF_000327485.1	WP_015285711.1	A	TRUE	unknown	arCOG03264@1|root,arCOG03264@2157|Archaea	unknown	unknown			NC_019943.1	1682018	1683325
WP_015285705.1	class I SAM-dependent methyltransferase	GCF_000327485.1	WP_015285711.1	A	TRUE	Q	COG0500@1|root,arCOG04989@2157|Archaea,2Y0ZS@28890|Euryarchaeota,2N9SX@224756|Methanomicrobia	Methyltransferase type 11	One carbon pool			NC_019943.1	1683389	1684027
WP_015285705.1	class I SAM-dependent methyltransferase	GCF_000327485.1	WP_015285711.1	A	TRUE	Q	COG0500@1|root,arCOG04989@2157|Archaea,2Y0ZS@28890|Euryarchaeota,2N9SX@224756|Methanomicrobia	Methyltransferase type 11	One carbon pool			NC_019943.1	1683389	1684027
WP_015285706.1	ASKHA domain-containing protein	GCF_000327485.1	WP_015285711.1	A	TRUE	C	COG0633@1|root,COG3894@1|root,arCOG02035@2157|Archaea,arCOG02842@2157|Archaea,2XVBE@28890|Euryarchaeota,2NB3A@224756|Methanomicrobia	Domain of unknown function (DUF4445)	One carbon pool			NC_019943.1	1684103	1685935
WP_015285706.1	ASKHA domain-containing protein	GCF_000327485.1	WP_015285711.1	A	TRUE	C	COG0633@1|root,COG3894@1|root,arCOG02035@2157|Archaea,arCOG02842@2157|Archaea,2XVBE@28890|Euryarchaeota,2NB3A@224756|Methanomicrobia	Domain of unknown function (DUF4445)	One carbon pool			NC_019943.1	1684103	1685935
WP_015285707.1	acetyl-CoA decarbonylase/synthase complex subunit gamma	GCF_000327485.1	WP_015285711.1	A	TRUE	C	COG1456@1|root,arCOG01979@2157|Archaea,2XUSG@28890|Euryarchaeota,2N9BD@224756|Methanomicrobia	Part of a complex that catalyzes the reversible cleavage of acetyl-CoA, allowing	One carbon pool	ko00680,ko00720,ko01120,ko01200,map00680,map00720,map01120,map01200	2.1.1.245	NC_019943.1	1686029	1687465
WP_015285707.1	acetyl-CoA decarbonylase/synthase complex subunit gamma	GCF_000327485.1	WP_015285711.1	A	TRUE	C	COG1456@1|root,arCOG01979@2157|Archaea,2XUSG@28890|Euryarchaeota,2N9BD@224756|Methanomicrobia	Part of a complex that catalyzes the reversible cleavage of acetyl-CoA, allowing	One carbon pool	ko00680,ko00720,ko01120,ko01200,map00680,map00720,map01120,map01200	2.1.1.245	NC_019943.1	1686029	1687465
WP_015285708.1	CO dehydrogenase/acetyl-CoA synthase subunit delta	GCF_000327485.1	WP_015285711.1	A	TRUE	C	COG2069@1|root,arCOG01980@2157|Archaea,2XTXS@28890|Euryarchaeota,2N93F@224756|Methanomicrobia	Part of a complex that catalyzes the reversible cleavage of acetyl-CoA, allowing	One carbon pool	ko00680,ko00720,ko01120,ko01200,map00680,map00720,map01120,map01200	2.1.1.245	NC_019943.1	1687462	1688718
WP_015285708.1	CO dehydrogenase/acetyl-CoA synthase subunit delta	GCF_000327485.1	WP_015285711.1	A	TRUE	C	COG2069@1|root,arCOG01980@2157|Archaea,2XTXS@28890|Euryarchaeota,2N93F@224756|Methanomicrobia	Part of a complex that catalyzes the reversible cleavage of acetyl-CoA, allowing	One carbon pool	ko00680,ko00720,ko01120,ko01200,map00680,map00720,map01120,map01200	2.1.1.245	NC_019943.1	1687462	1688718
WP_015285709.1	CO dehydrogenase/CO-methylating acetyl-CoA synthase complex subunit beta	GCF_000327485.1	WP_015285711.1	A	TRUE	C	COG1614@1|root,arCOG04360@2157|Archaea,2XU0D@28890|Euryarchaeota,2N95I@224756|Methanomicrobia	Part of a complex that catalyzes the reversible cleavage of acetyl-CoA, allowing growth on acetate as sole source of carbon and energy. The alpha-epsilon complex generates CO from CO(2), while the beta subunit (this protein) combines the CO with CoA and a methyl group to form acetyl-CoA. The methyl group, which is incorporated into acetyl-CoA, is transferred to the beta subunit by a corrinoid iro…	One carbon pool	ko00680,ko01120,ko01200,map00680,map01120,map01200		NC_019943.1	1688699	1690102
WP_015285709.1	CO dehydrogenase/CO-methylating acetyl-CoA synthase complex subunit beta	GCF_000327485.1	WP_015285711.1	A	TRUE	C	COG1614@1|root,arCOG04360@2157|Archaea,2XU0D@28890|Euryarchaeota,2N95I@224756|Methanomicrobia	Part of a complex that catalyzes the reversible cleavage of acetyl-CoA, allowing growth on acetate as sole source of carbon and energy. The alpha-epsilon complex generates CO from CO(2), while the beta subunit (this protein) combines the CO with CoA and a methyl group to form acetyl-CoA. The methyl group, which is incorporated into acetyl-CoA, is transferred to the beta subunit by a corrinoid iro…	One carbon pool	ko00680,ko01120,ko01200,map00680,map01120,map01200		NC_019943.1	1688699	1690102
WP_015285710.1	CO dehydrogenase/acetyl-CoA synthase complex subunit epsilon	GCF_000327485.1	WP_015285711.1	A	TRUE	C	COG1880@1|root,arCOG04408@2157|Archaea,2XWPE@28890|Euryarchaeota,2NA4Z@224756|Methanomicrobia	Part of a complex that catalyzes the reversible cleavage of acetyl-CoA, allowing growth on acetate as sole source of carbon and energy. The alpha-epsilon subcomponent functions as a carbon monoxide dehydrogenase. The precise role of the epsilon subunit is unclear	One carbon pool	ko00680,ko01120,ko01200,map00680,map01120,map01200		NC_019943.1	1690118	1690657
WP_015285710.1	CO dehydrogenase/acetyl-CoA synthase complex subunit epsilon	GCF_000327485.1	WP_015285711.1	A	TRUE	C	COG1880@1|root,arCOG04408@2157|Archaea,2XWPE@28890|Euryarchaeota,2NA4Z@224756|Methanomicrobia	Part of a complex that catalyzes the reversible cleavage of acetyl-CoA, allowing growth on acetate as sole source of carbon and energy. The alpha-epsilon subcomponent functions as a carbon monoxide dehydrogenase. The precise role of the epsilon subunit is unclear	One carbon pool	ko00680,ko01120,ko01200,map00680,map01120,map01200		NC_019943.1	1690118	1690657
WP_015285711.1	CO dehydrogenase/acetyl-CoA synthase complex subunit alpha	GCF_000327485.1	WP_015285711.1	A	FALSE	unknown		unknown	CODH			NC_019943.1	1690660	1693011
WP_015324381.1	CO dehydrogenase/acetyl-CoA synthase complex subunit alpha	GCF_000328665.1	WP_015324381.1	A	FALSE	unknown		unknown	CODH			NC_019977.1	962798	965212
WP_015324382.1	CO dehydrogenase/acetyl-CoA synthase complex subunit epsilon	GCF_000328665.1	WP_015324381.1	A	TRUE	C	COG1880@1|root,arCOG04408@2157|Archaea,2XWPE@28890|Euryarchaeota,2NA4Z@224756|Methanomicrobia	Part of a complex that catalyzes the reversible cleavage of acetyl-CoA, allowing growth on acetate as sole source of carbon and energy. The alpha-epsilon subcomponent functions as a carbon monoxide dehydrogenase. The precise role of the epsilon subunit is unclear	One carbon pool	ko00680,ko01120,ko01200,map00680,map01120,map01200		NC_019977.1	965212	965721
WP_015324382.1	CO dehydrogenase/acetyl-CoA synthase complex subunit epsilon	GCF_000328665.1	WP_015324381.1	A	TRUE	C	COG1880@1|root,arCOG04408@2157|Archaea,2XWPE@28890|Euryarchaeota,2NA4Z@224756|Methanomicrobia	Part of a complex that catalyzes the reversible cleavage of acetyl-CoA, allowing growth on acetate as sole source of carbon and energy. The alpha-epsilon subcomponent functions as a carbon monoxide dehydrogenase. The precise role of the epsilon subunit is unclear	One carbon pool	ko00680,ko01120,ko01200,map00680,map01120,map01200		NC_019977.1	965212	965721
WP_015324383.1	CO dehydrogenase/CO-methylating acetyl-CoA synthase complex subunit beta	GCF_000328665.1	WP_015324381.1	A	TRUE	C	COG1614@1|root,arCOG04360@2157|Archaea,2XU0D@28890|Euryarchaeota,2N95I@224756|Methanomicrobia	Part of a complex that catalyzes the reversible cleavage of acetyl-CoA, allowing growth on acetate as sole source of carbon and energy. The alpha-epsilon complex generates CO from CO(2), while the beta subunit (this protein) combines the CO with CoA and a methyl group to form acetyl-CoA. The methyl group, which is incorporated into acetyl-CoA, is transferred to the beta subunit by a corrinoid iro…	One carbon pool	ko00680,ko01120,ko01200,map00680,map01120,map01200		NC_019977.1	965753	967183
WP_015324383.1	CO dehydrogenase/CO-methylating acetyl-CoA synthase complex subunit beta	GCF_000328665.1	WP_015324381.1	A	TRUE	C	COG1614@1|root,arCOG04360@2157|Archaea,2XU0D@28890|Euryarchaeota,2N95I@224756|Methanomicrobia	Part of a complex that catalyzes the reversible cleavage of acetyl-CoA, allowing growth on acetate as sole source of carbon and energy. The alpha-epsilon complex generates CO from CO(2), while the beta subunit (this protein) combines the CO with CoA and a methyl group to form acetyl-CoA. The methyl group, which is incorporated into acetyl-CoA, is transferred to the beta subunit by a corrinoid iro…	One carbon pool	ko00680,ko01120,ko01200,map00680,map01120,map01200		NC_019977.1	965753	967183
WP_015324384.1	AAA family ATPase	GCF_000328665.1	WP_015324381.1	A	TRUE	D	COG3640@1|root,arCOG00587@2157|Archaea,2XT61@28890|Euryarchaeota,2N9QI@224756|Methanomicrobia	AAA domain	CooC			NC_019977.1	967196	967948
WP_015324385.1	CO dehydrogenase/acetyl-CoA synthase subunit delta	GCF_000328665.1	WP_015324381.1	A	TRUE	C	COG2069@1|root,arCOG01980@2157|Archaea,2XTXS@28890|Euryarchaeota,2N93F@224756|Methanomicrobia	Part of a complex that catalyzes the reversible cleavage of acetyl-CoA, allowing	One carbon pool	ko00680,ko00720,ko01120,ko01200,map00680,map00720,map01120,map01200	2.1.1.245	NC_019977.1	967977	969314
WP_015324385.1	CO dehydrogenase/acetyl-CoA synthase subunit delta	GCF_000328665.1	WP_015324381.1	A	TRUE	C	COG2069@1|root,arCOG01980@2157|Archaea,2XTXS@28890|Euryarchaeota,2N93F@224756|Methanomicrobia	Part of a complex that catalyzes the reversible cleavage of acetyl-CoA, allowing	One carbon pool	ko00680,ko00720,ko01120,ko01200,map00680,map00720,map01120,map01200	2.1.1.245	NC_019977.1	967977	969314
WP_015324386.1	acetyl-CoA decarbonylase/synthase complex subunit gamma	GCF_000328665.1	WP_015324381.1	A	TRUE	C	COG1456@1|root,arCOG01979@2157|Archaea,2XUSG@28890|Euryarchaeota,2N9BD@224756|Methanomicrobia	Part of a complex that catalyzes the reversible cleavage of acetyl-CoA, allowing	One carbon pool	ko00680,ko00720,ko01120,ko01200,map00680,map00720,map01120,map01200	2.1.1.245	NC_019977.1	969318	970727
WP_015324386.1	acetyl-CoA decarbonylase/synthase complex subunit gamma	GCF_000328665.1	WP_015324381.1	A	TRUE	C	COG1456@1|root,arCOG01979@2157|Archaea,2XUSG@28890|Euryarchaeota,2N9BD@224756|Methanomicrobia	Part of a complex that catalyzes the reversible cleavage of acetyl-CoA, allowing	One carbon pool	ko00680,ko00720,ko01120,ko01200,map00680,map00720,map01120,map01200	2.1.1.245	NC_019977.1	969318	970727
WP_015324387.1	hypothetical protein	GCF_000328665.1	WP_015324381.1	A	TRUE	unknown		unknown	unknown			NC_019977.1	970999	971355
WP_004590889.1	CO dehydrogenase/CO-methylating acetyl-CoA synthase complex subunit beta	GCF_000371805.1	WP_017980953.1	A	TRUE	C	COG1614@1|root,arCOG04360@2157|Archaea,2XU0D@28890|Euryarchaeota,23Q7P@183939|Methanococci	Part of a complex that catalyzes the reversible cleavage of acetyl-CoA, allowing autotrophic growth from CO(2). The alpha- epsilon complex generates CO from CO(2), while the beta subunit (this protein) combines the CO with CoA and a methyl group to form acetyl-CoA. The methyl group, which is incorporated into acetyl- CoA, is transferred to the beta subunit by a corrinoid iron-sulfur protein (the …	One carbon pool	ko00680,ko01120,ko01200,map00680,map01120,map01200	1.2.7.4	NZ_AQUK01000001.1	278962	280338
WP_004590889.1	CO dehydrogenase/CO-methylating acetyl-CoA synthase complex subunit beta	GCF_000371805.1	WP_017980953.1	A	TRUE	C	COG1614@1|root,arCOG04360@2157|Archaea,2XU0D@28890|Euryarchaeota,23Q7P@183939|Methanococci	Part of a complex that catalyzes the reversible cleavage of acetyl-CoA, allowing autotrophic growth from CO(2). The alpha- epsilon complex generates CO from CO(2), while the beta subunit (this protein) combines the CO with CoA and a methyl group to form acetyl-CoA. The methyl group, which is incorporated into acetyl- CoA, is transferred to the beta subunit by a corrinoid iron-sulfur protein (the …	One carbon pool	ko00680,ko01120,ko01200,map00680,map01120,map01200	1.2.7.4	NZ_AQUK01000001.1	278962	280338
WP_004590891.1	4Fe-4S dicluster domain-containing protein	GCF_000371805.1	WP_017980953.1	A	TRUE	C	COG1142@1|root,arCOG01502@2157|Archaea,2XXPM@28890|Euryarchaeota,23QVU@183939|Methanococci	PFAM 4Fe-4S ferredoxin, iron-sulfur binding domain protein	FeS			NZ_AQUK01000001.1	280349	280789
WP_004590893.1	CO dehydrogenase/acetyl-CoA synthase complex subunit epsilon	GCF_000371805.1	WP_017980953.1	A	TRUE	C	COG1880@1|root,arCOG04408@2157|Archaea,2XZG7@28890|Euryarchaeota,23R6S@183939|Methanococci	PFAM CO dehydrogenase beta subunit acetyl-CoA synthase epsilon subunit	One carbon pool	ko00680,ko01120,ko01200,map00680,map01120,map01200		NZ_AQUK01000001.1	280794	281219
WP_004590893.1	CO dehydrogenase/acetyl-CoA synthase complex subunit epsilon	GCF_000371805.1	WP_017980953.1	A	TRUE	C	COG1880@1|root,arCOG04408@2157|Archaea,2XZG7@28890|Euryarchaeota,23R6S@183939|Methanococci	PFAM CO dehydrogenase beta subunit acetyl-CoA synthase epsilon subunit	One carbon pool	ko00680,ko01120,ko01200,map00680,map01120,map01200		NZ_AQUK01000001.1	280794	281219
WP_017980953.1	CO dehydrogenase/acetyl-CoA synthase complex subunit alpha	GCF_000371805.1	WP_017980953.1	A	FALSE	unknown		unknown	CODH			NZ_AQUK01000001.1	281226	283517
WP_015591584.1	acetyl-CoA decarbonylase/synthase complex subunit gamma	GCF_000385565.1	WP_015591589.1	A	TRUE	H	COG1456@1|root,arCOG01979@2157|Archaea,2XUSG@28890|Euryarchaeota,245ZW@183980|Archaeoglobi	Part of a complex that catalyzes the reversible cleavage of acetyl-CoA, allowing autotrophic growth from CO(2)	One carbon pool	ko00680,ko00720,ko01120,ko01200,map00680,map00720,map01120,map01200	2.1.1.245	NC_021169.1	1830120	1831529
WP_015591584.1	acetyl-CoA decarbonylase/synthase complex subunit gamma	GCF_000385565.1	WP_015591589.1	A	TRUE	H	COG1456@1|root,arCOG01979@2157|Archaea,2XUSG@28890|Euryarchaeota,245ZW@183980|Archaeoglobi	Part of a complex that catalyzes the reversible cleavage of acetyl-CoA, allowing autotrophic growth from CO(2)	One carbon pool	ko00680,ko00720,ko01120,ko01200,map00680,map00720,map01120,map01200	2.1.1.245	NC_021169.1	1830120	1831529
WP_015591585.1	CO dehydrogenase/acetyl-CoA synthase subunit delta	GCF_000385565.1	WP_015591589.1	A	TRUE	C	COG2069@1|root,arCOG01980@2157|Archaea,2XTXS@28890|Euryarchaeota,245TW@183980|Archaeoglobi	Part of a complex that catalyzes the reversible cleavage of acetyl-CoA, allowing autotrophic growth from CO(2). Probably maintains the overall quaternary structure of the ACDS complex	One carbon pool	ko00680,ko00720,ko01120,ko01200,map00680,map00720,map01120,map01200	2.1.1.245	NC_021169.1	1831532	1832902
WP_015591585.1	CO dehydrogenase/acetyl-CoA synthase subunit delta	GCF_000385565.1	WP_015591589.1	A	TRUE	C	COG2069@1|root,arCOG01980@2157|Archaea,2XTXS@28890|Euryarchaeota,245TW@183980|Archaeoglobi	Part of a complex that catalyzes the reversible cleavage of acetyl-CoA, allowing autotrophic growth from CO(2). Probably maintains the overall quaternary structure of the ACDS complex	One carbon pool	ko00680,ko00720,ko01120,ko01200,map00680,map00720,map01120,map01200	2.1.1.245	NC_021169.1	1831532	1832902
WP_015591586.1	AAA family ATPase	GCF_000385565.1	WP_015591589.1	A	TRUE	D	COG3640@1|root,arCOG00587@2157|Archaea,2XT61@28890|Euryarchaeota,245QG@183980|Archaeoglobi	AAA domain	CooC			NC_021169.1	1832895	1833656
WP_048098398.1	CO dehydrogenase/CO-methylating acetyl-CoA synthase complex subunit beta	GCF_000385565.1	WP_015591589.1	A	TRUE	C	COG1614@1|root,arCOG04360@2157|Archaea,2XU0D@28890|Euryarchaeota,2462N@183980|Archaeoglobi	Part of a complex that catalyzes the reversible cleavage of acetyl-CoA, allowing autotrophic growth from CO(2). The alpha- epsilon complex generates CO from CO(2), while the beta subunit (this protein) combines the CO with CoA and a methyl group to form acetyl-CoA. The methyl group, which is incorporated into acetyl- CoA, is transferred to the beta subunit by a corrinoid iron-sulfur protein (the …	One carbon pool	ko00680,ko01120,ko01200,map00680,map01120,map01200		NC_021169.1	1833659	1835224
WP_048098398.1	CO dehydrogenase/CO-methylating acetyl-CoA synthase complex subunit beta	GCF_000385565.1	WP_015591589.1	A	TRUE	C	COG1614@1|root,arCOG04360@2157|Archaea,2XU0D@28890|Euryarchaeota,2462N@183980|Archaeoglobi	Part of a complex that catalyzes the reversible cleavage of acetyl-CoA, allowing autotrophic growth from CO(2). The alpha- epsilon complex generates CO from CO(2), while the beta subunit (this protein) combines the CO with CoA and a methyl group to form acetyl-CoA. The methyl group, which is incorporated into acetyl- CoA, is transferred to the beta subunit by a corrinoid iron-sulfur protein (the …	One carbon pool	ko00680,ko01120,ko01200,map00680,map01120,map01200		NC_021169.1	1833659	1835224
WP_015591588.1	CO dehydrogenase/acetyl-CoA synthase complex subunit epsilon	GCF_000385565.1	WP_015591589.1	A	TRUE	C	COG1880@1|root,arCOG04408@2157|Archaea,2XWPE@28890|Euryarchaeota,245XY@183980|Archaeoglobi	Part of a complex that catalyzes the reversible cleavage of acetyl-CoA, allowing autotrophic growth from CO(2). The alpha- epsilon subcomponent functions as a carbon monoxide dehydrogenase. The precise role of the epsilon subunit is unclear	One carbon pool	ko00680,ko01120,ko01200,map00680,map01120,map01200		NC_021169.1	1835258	1835788
WP_015591588.1	CO dehydrogenase/acetyl-CoA synthase complex subunit epsilon	GCF_000385565.1	WP_015591589.1	A	TRUE	C	COG1880@1|root,arCOG04408@2157|Archaea,2XWPE@28890|Euryarchaeota,245XY@183980|Archaeoglobi	Part of a complex that catalyzes the reversible cleavage of acetyl-CoA, allowing autotrophic growth from CO(2). The alpha- epsilon subcomponent functions as a carbon monoxide dehydrogenase. The precise role of the epsilon subunit is unclear	One carbon pool	ko00680,ko01120,ko01200,map00680,map01120,map01200		NC_021169.1	1835258	1835788
WP_015591589.1	CO dehydrogenase/acetyl-CoA synthase complex subunit alpha	GCF_000385565.1	WP_015591589.1	A	FALSE	unknown		unknown	CODH			NC_021169.1	1835799	1838201
WP_015591590.1	D-aminoacyl-tRNA deacylase	GCF_000385565.1	WP_015591589.1	A	TRUE	J	COG1650@1|root,arCOG01616@2157|Archaea,2XUM0@28890|Euryarchaeota,245S9@183980|Archaeoglobi	D-aminoacyl-tRNA deacylase with broad substrate specificity. By recycling D-aminoacyl-tRNA to D-amino acids and free tRNA molecules, this enzyme counteracts the toxicity associated with the formation of D-aminoacyl-tRNA entities in vivo	unknown		3.1.1.96	NC_021169.1	1838453	1839289
WP_015591591.1	type II methionyl aminopeptidase	GCF_000385565.1	WP_015591589.1	A	TRUE	E	COG0024@1|root,arCOG01001@2157|Archaea,2XT8G@28890|Euryarchaeota,24605@183980|Archaeoglobi	Removes the N-terminal methionine from nascent proteins. The N-terminal methionine is often cleaved when the second residue in the primary sequence is small and uncharged (Met-Ala-, Cys, Gly, Pro, Ser, Thr, or Val)	unknown		3.4.11.18	NC_021169.1	1839309	1840181
WP_015591592.1	acetyl-CoA hydrolase/transferase family protein	GCF_000385565.1	WP_015591589.1	A	TRUE	C	COG0427@1|root,arCOG06124@2157|Archaea,2XVQA@28890|Euryarchaeota	acetyl-CoA hydrolase	unknown	ko00020,ko00620,ko00650,ko00660,ko01100,ko01110,ko01120,ko01130,ko01200,map00020,map00620,map00650,map00660,map01100,map01110,map01120,map01130,map01200	2.8.3.18	NC_021169.1	1840241	1841644
WP_015591593.1	RtcB family protein	GCF_000385565.1	WP_015591589.1	A	TRUE	L	COG1690@1|root,arCOG04246@2157|Archaea,2XTIC@28890|Euryarchaeota,245RW@183980|Archaeoglobi	Belongs to the RtcB family	unknown		6.5.1.3	NC_021169.1	1841823	1843256
WP_144060541.1	hypothetical protein	GCF_000385565.1	WP_015591589.1	A	TRUE	unknown	arCOG10371@1|root,arCOG10371@2157|Archaea	unknown	unknown			NC_021169.1	1843539	1844012
WP_015591595.1	DNA polymerase ligase N-terminal domain-containing protein	GCF_000385565.1	WP_015591589.1	A	TRUE	L	COG1793@1|root,arCOG05256@2157|Archaea,2XY7Z@28890|Euryarchaeota	DNA ligase D, 3-phosphoesterase domain	unknown			NC_021169.1	1844207	1844575
WP_023843987.1	hypothetical protein	GCF_000504205.1	WP_023843993.1	A	TRUE	unknown		unknown	unknown			NZ_AZAJ01000001.1	263213	263560
WP_023843988.1	acetyl-CoA decarbonylase/synthase complex subunit gamma	GCF_000504205.1	WP_023843993.1	A	TRUE	C	COG1456@1|root,arCOG01979@2157|Archaea,2XUSG@28890|Euryarchaeota,2N9BD@224756|Methanomicrobia	Part of a complex that catalyzes the reversible cleavage of acetyl-CoA, allowing	One carbon pool	ko00680,ko00720,ko01120,ko01200,map00680,map00720,map01120,map01200	2.1.1.245	NZ_AZAJ01000001.1	263721	265130
WP_023843988.1	acetyl-CoA decarbonylase/synthase complex subunit gamma	GCF_000504205.1	WP_023843993.1	A	TRUE	C	COG1456@1|root,arCOG01979@2157|Archaea,2XUSG@28890|Euryarchaeota,2N9BD@224756|Methanomicrobia	Part of a complex that catalyzes the reversible cleavage of acetyl-CoA, allowing	One carbon pool	ko00680,ko00720,ko01120,ko01200,map00680,map00720,map01120,map01200	2.1.1.245	NZ_AZAJ01000001.1	263721	265130
WP_023843989.1	CO dehydrogenase/acetyl-CoA synthase subunit delta	GCF_000504205.1	WP_023843993.1	A	TRUE	C	COG2069@1|root,arCOG01980@2157|Archaea,2XTXS@28890|Euryarchaeota,2N93F@224756|Methanomicrobia	Part of a complex that catalyzes the reversible cleavage of acetyl-CoA, allowing	One carbon pool	ko00680,ko00720,ko01120,ko01200,map00680,map00720,map01120,map01200	2.1.1.245	NZ_AZAJ01000001.1	265134	266459
WP_023843989.1	CO dehydrogenase/acetyl-CoA synthase subunit delta	GCF_000504205.1	WP_023843993.1	A	TRUE	C	COG2069@1|root,arCOG01980@2157|Archaea,2XTXS@28890|Euryarchaeota,2N93F@224756|Methanomicrobia	Part of a complex that catalyzes the reversible cleavage of acetyl-CoA, allowing	One carbon pool	ko00680,ko00720,ko01120,ko01200,map00680,map00720,map01120,map01200	2.1.1.245	NZ_AZAJ01000001.1	265134	266459
WP_023843990.1	AAA family ATPase	GCF_000504205.1	WP_023843993.1	A	TRUE	D	COG3640@1|root,arCOG00587@2157|Archaea,2XT61@28890|Euryarchaeota,2N9QI@224756|Methanomicrobia	AAA domain	CooC			NZ_AZAJ01000001.1	266486	267238
WP_023843991.1	CO dehydrogenase/CO-methylating acetyl-CoA synthase complex subunit beta	GCF_000504205.1	WP_023843993.1	A	TRUE	C	COG1614@1|root,arCOG04360@2157|Archaea,2XU0D@28890|Euryarchaeota,2N95I@224756|Methanomicrobia	Part of a complex that catalyzes the reversible cleavage of acetyl-CoA, allowing growth on acetate as sole source of carbon and energy. The alpha-epsilon complex generates CO from CO(2), while the beta subunit (this protein) combines the CO with CoA and a methyl group to form acetyl-CoA. The methyl group, which is incorporated into acetyl-CoA, is transferred to the beta subunit by a corrinoid iro…	One carbon pool	ko00680,ko01120,ko01200,map00680,map01120,map01200		NZ_AZAJ01000001.1	267251	268660
WP_023843991.1	CO dehydrogenase/CO-methylating acetyl-CoA synthase complex subunit beta	GCF_000504205.1	WP_023843993.1	A	TRUE	C	COG1614@1|root,arCOG04360@2157|Archaea,2XU0D@28890|Euryarchaeota,2N95I@224756|Methanomicrobia	Part of a complex that catalyzes the reversible cleavage of acetyl-CoA, allowing growth on acetate as sole source of carbon and energy. The alpha-epsilon complex generates CO from CO(2), while the beta subunit (this protein) combines the CO with CoA and a methyl group to form acetyl-CoA. The methyl group, which is incorporated into acetyl-CoA, is transferred to the beta subunit by a corrinoid iro…	One carbon pool	ko00680,ko01120,ko01200,map00680,map01120,map01200		NZ_AZAJ01000001.1	267251	268660
WP_023843992.1	CO dehydrogenase/acetyl-CoA synthase complex subunit epsilon	GCF_000504205.1	WP_023843993.1	A	TRUE	C	COG1880@1|root,arCOG04408@2157|Archaea,2XWPE@28890|Euryarchaeota,2NA4Z@224756|Methanomicrobia	Part of a complex that catalyzes the reversible cleavage of acetyl-CoA, allowing growth on acetate as sole source of carbon and energy. The alpha-epsilon subcomponent functions as a carbon monoxide dehydrogenase. The precise role of the epsilon subunit is unclear	One carbon pool	ko00680,ko01120,ko01200,map00680,map01120,map01200		NZ_AZAJ01000001.1	268695	269207
WP_023843992.1	CO dehydrogenase/acetyl-CoA synthase complex subunit epsilon	GCF_000504205.1	WP_023843993.1	A	TRUE	C	COG1880@1|root,arCOG04408@2157|Archaea,2XWPE@28890|Euryarchaeota,2NA4Z@224756|Methanomicrobia	Part of a complex that catalyzes the reversible cleavage of acetyl-CoA, allowing growth on acetate as sole source of carbon and energy. The alpha-epsilon subcomponent functions as a carbon monoxide dehydrogenase. The precise role of the epsilon subunit is unclear	One carbon pool	ko00680,ko01120,ko01200,map00680,map01120,map01200		NZ_AZAJ01000001.1	268695	269207
WP_023843993.1	CO dehydrogenase/acetyl-CoA synthase complex subunit alpha	GCF_000504205.1	WP_023843993.1	A	FALSE	unknown		unknown	CODH			NZ_AZAJ01000001.1	269208	271619
WP_048089759.1	CO dehydrogenase/acetyl-CoA synthase complex subunit alpha	GCF_000685155.1	WP_048089759.1	A	FALSE	unknown		unknown	CODH			NZ_JMIY01000002.1	361718	364096
WP_048089761.1	CO dehydrogenase/acetyl-CoA synthase complex subunit epsilon	GCF_000685155.1	WP_048089759.1	A	TRUE	C	COG1880@1|root,arCOG04408@2157|Archaea,2XWPE@28890|Euryarchaeota,2NA4Z@224756|Methanomicrobia	Part of a complex that catalyzes the reversible cleavage of acetyl-CoA, allowing growth on acetate as sole source of carbon and energy. The alpha-epsilon subcomponent functions as a carbon monoxide dehydrogenase. The precise role of the epsilon subunit is unclear	One carbon pool	ko00680,ko01120,ko01200,map00680,map01120,map01200		NZ_JMIY01000002.1	364097	364648
WP_048089761.1	CO dehydrogenase/acetyl-CoA synthase complex subunit epsilon	GCF_000685155.1	WP_048089759.1	A	TRUE	C	COG1880@1|root,arCOG04408@2157|Archaea,2XWPE@28890|Euryarchaeota,2NA4Z@224756|Methanomicrobia	Part of a complex that catalyzes the reversible cleavage of acetyl-CoA, allowing growth on acetate as sole source of carbon and energy. The alpha-epsilon subcomponent functions as a carbon monoxide dehydrogenase. The precise role of the epsilon subunit is unclear	One carbon pool	ko00680,ko01120,ko01200,map00680,map01120,map01200		NZ_JMIY01000002.1	364097	364648
WP_048089762.1	CO dehydrogenase/CO-methylating acetyl-CoA synthase complex subunit beta	GCF_000685155.1	WP_048089759.1	A	TRUE	C	COG1614@1|root,arCOG04360@2157|Archaea,2XU0D@28890|Euryarchaeota,2N95I@224756|Methanomicrobia	Part of a complex that catalyzes the reversible cleavage of acetyl-CoA, allowing growth on acetate as sole source of carbon and energy. The alpha-epsilon complex generates CO from CO(2), while the beta subunit (this protein) combines the CO with CoA and a methyl group to form acetyl-CoA. The methyl group, which is incorporated into acetyl-CoA, is transferred to the beta subunit by a corrinoid iro…	One carbon pool	ko00680,ko01120,ko01200,map00680,map01120,map01200		NZ_JMIY01000002.1	364664	366079
WP_048089762.1	CO dehydrogenase/CO-methylating acetyl-CoA synthase complex subunit beta	GCF_000685155.1	WP_048089759.1	A	TRUE	C	COG1614@1|root,arCOG04360@2157|Archaea,2XU0D@28890|Euryarchaeota,2N95I@224756|Methanomicrobia	Part of a complex that catalyzes the reversible cleavage of acetyl-CoA, allowing growth on acetate as sole source of carbon and energy. The alpha-epsilon complex generates CO from CO(2), while the beta subunit (this protein) combines the CO with CoA and a methyl group to form acetyl-CoA. The methyl group, which is incorporated into acetyl-CoA, is transferred to the beta subunit by a corrinoid iro…	One carbon pool	ko00680,ko01120,ko01200,map00680,map01120,map01200		NZ_JMIY01000002.1	364664	366079
WP_042686517.1	preprotein translocase subunit Sec61beta	GCF_000711905.1	WP_042686524.1	A	TRUE	U	COG4023@1|root,arCOG02957@2157|Archaea,2Y6WB@28890|Euryarchaeota,2NA5T@224756|Methanomicrobia	but it may be involved in stabilization of the trimeric complex	unknown			NZ_JONQ01000012.1	62963	63136
WP_042686519.1	CO dehydrogenase/CO-methylating acetyl-CoA synthase complex subunit beta	GCF_000711905.1	WP_042686524.1	A	TRUE	C	COG1614@1|root,arCOG04360@2157|Archaea,2XU0D@28890|Euryarchaeota,2N95I@224756|Methanomicrobia	Part of a complex that catalyzes the reversible cleavage of acetyl-CoA, allowing growth on acetate as sole source of carbon and energy. The alpha-epsilon complex generates CO from CO(2), while the beta subunit (this protein) combines the CO with CoA and a methyl group to form acetyl-CoA. The methyl group, which is incorporated into acetyl-CoA, is transferred to the beta subunit by a corrinoid iro…	One carbon pool	ko00680,ko01120,ko01200,map00680,map01120,map01200		NZ_JONQ01000012.1	63149	64576
WP_042686519.1	CO dehydrogenase/CO-methylating acetyl-CoA synthase complex subunit beta	GCF_000711905.1	WP_042686524.1	A	TRUE	C	COG1614@1|root,arCOG04360@2157|Archaea,2XU0D@28890|Euryarchaeota,2N95I@224756|Methanomicrobia	Part of a complex that catalyzes the reversible cleavage of acetyl-CoA, allowing growth on acetate as sole source of carbon and energy. The alpha-epsilon complex generates CO from CO(2), while the beta subunit (this protein) combines the CO with CoA and a methyl group to form acetyl-CoA. The methyl group, which is incorporated into acetyl-CoA, is transferred to the beta subunit by a corrinoid iro…	One carbon pool	ko00680,ko01120,ko01200,map00680,map01120,map01200		NZ_JONQ01000012.1	63149	64576
WP_042686521.1	CO dehydrogenase/acetyl-CoA synthase complex subunit epsilon	GCF_000711905.1	WP_042686524.1	A	TRUE	C	COG1880@1|root,arCOG04408@2157|Archaea,2XWPE@28890|Euryarchaeota,2NA4Z@224756|Methanomicrobia	Part of a complex that catalyzes the reversible cleavage of acetyl-CoA, allowing growth on acetate as sole source of carbon and energy. The alpha-epsilon subcomponent functions as a carbon monoxide dehydrogenase. The precise role of the epsilon subunit is unclear	One carbon pool	ko00680,ko01120,ko01200,map00680,map01120,map01200		NZ_JONQ01000012.1	64609	65145
WP_042686521.1	CO dehydrogenase/acetyl-CoA synthase complex subunit epsilon	GCF_000711905.1	WP_042686524.1	A	TRUE	C	COG1880@1|root,arCOG04408@2157|Archaea,2XWPE@28890|Euryarchaeota,2NA4Z@224756|Methanomicrobia	Part of a complex that catalyzes the reversible cleavage of acetyl-CoA, allowing growth on acetate as sole source of carbon and energy. The alpha-epsilon subcomponent functions as a carbon monoxide dehydrogenase. The precise role of the epsilon subunit is unclear	One carbon pool	ko00680,ko01120,ko01200,map00680,map01120,map01200		NZ_JONQ01000012.1	64609	65145
WP_042686524.1	CO dehydrogenase/acetyl-CoA synthase complex subunit alpha	GCF_000711905.1	WP_042686524.1	A	FALSE	unknown		unknown	CODH			NZ_JONQ01000012.1	65147	67534
WP_042686527.1	aminotransferase class I/II-fold pyridoxal phosphate-dependent enzyme	GCF_000711905.1	WP_042686524.1	A	TRUE	E	COG0436@1|root,arCOG01130@2157|Archaea,2XSVT@28890|Euryarchaeota,2N95M@224756|Methanomicrobia	PFAM Aminotransferase class I and II	unknown			NZ_JONQ01000012.1	67685	68854
WP_042686529.1	Lrp/AsnC family transcriptional regulator	GCF_000711905.1	WP_042686524.1	A	TRUE	K	COG1522@1|root,arCOG01580@2157|Archaea,2XTN6@28890|Euryarchaeota,2N9R1@224756|Methanomicrobia	PFAM regulatory protein AsnC Lrp family	unknown			NZ_JONQ01000012.1	68862	69353
WP_245597054.1	coiled-coil protein	GCF_000711905.1	WP_042686524.1	A	TRUE	S	COG1340@1|root,arCOG01159@2157|Archaea,2XU21@28890|Euryarchaeota,23T32@183963|Halobacteria	archaeal coiled-coil protein	unknown			NZ_JONQ01000012.1	69358	70236
WP_084174120.1	phosphoserine phosphatase SerB	GCF_000711905.1	WP_042686524.1	A	TRUE	E	COG0560@1|root,arCOG01158@2157|Archaea,2XT0C@28890|Euryarchaeota,2N9NA@224756|Methanomicrobia	haloacid dehalogenase-like hydrolase	unknown	ko00260,ko00680,ko01100,ko01120,ko01130,ko01200,ko01230,map00260,map00680,map01100,map01120,map01130,map01200,map01230	3.1.3.3	NZ_JONQ01000012.1	70202	70966
WP_042686533.1	geranylgeranylglycerol-phosphate geranylgeranyltransferase	GCF_000711905.1	WP_042686524.1	A	TRUE	H	COG0382@1|root,arCOG00476@2157|Archaea,2XUHS@28890|Euryarchaeota,2N9SR@224756|Methanomicrobia	Prenyltransferase that catalyzes the transfer of the geranylgeranyl moiety of geranylgeranyl diphosphate (GGPP) to the C2 hydroxyl of (S)-3-O-geranylgeranylglyceryl phosphate (GGGP). This reaction is the second ether-bond-formation step in the biosynthesis of archaeal membrane lipids	unknown	ko00564,map00564	2.5.1.42	NZ_JONQ01000012.1	71041	71892
WP_245597056.1	quinolinate synthase NadA	GCF_000711905.1	WP_042686524.1	A	TRUE	H	COG0379@1|root,arCOG04459@2157|Archaea,2XUGT@28890|Euryarchaeota,2N922@224756|Methanomicrobia	Catalyzes the condensation of iminoaspartate with dihydroxyacetone phosphate to form quinolinate	unknown	ko00760,ko01100,map00760,map01100	2.5.1.72	NZ_JONQ01000012.1	71903	72814
WP_048096400.1	CO dehydrogenase/acetyl-CoA synthase complex subunit alpha	GCF_000734035.1	WP_048096400.1	A	FALSE	unknown		unknown	CODH			NZ_CP006577.1	2276464	2278860
WP_048096735.1	CO dehydrogenase/acetyl-CoA synthase complex subunit epsilon	GCF_000734035.1	WP_048096400.1	A	TRUE	C	COG1880@1|root,arCOG04408@2157|Archaea,2XWPE@28890|Euryarchaeota	Part of a complex that catalyzes the reversible cleavage of acetyl-CoA, allowing autotrophic growth from CO(2). The alpha- epsilon subcomponent functions as a carbon monoxide dehydrogenase. The precise role of the epsilon subunit is unclear	One carbon pool	ko00680,ko01120,ko01200,map00680,map01120,map01200		NZ_CP006577.1	2278871	2279398
WP_048096735.1	CO dehydrogenase/acetyl-CoA synthase complex subunit epsilon	GCF_000734035.1	WP_048096400.1	A	TRUE	C	COG1880@1|root,arCOG04408@2157|Archaea,2XWPE@28890|Euryarchaeota	Part of a complex that catalyzes the reversible cleavage of acetyl-CoA, allowing autotrophic growth from CO(2). The alpha- epsilon subcomponent functions as a carbon monoxide dehydrogenase. The precise role of the epsilon subunit is unclear	One carbon pool	ko00680,ko01120,ko01200,map00680,map01120,map01200		NZ_CP006577.1	2278871	2279398
WP_010879886.1	23S rRNA (guanosine(2251)-2'-O)-methyltransferase RlmB	GCF_000734035.1	WP_048096400.1	A	TRUE	J	COG0565@1|root,arCOG01018@2157|Archaea,2XWX0@28890|Euryarchaeota,24641@183980|Archaeoglobi	RNA methyltransferase TrmH family	unknown		2.1.1.185	NZ_CP006577.1	2279677	2280351
WP_010879887.1	transglutaminase-like domain-containing protein	GCF_000734035.1	WP_048096400.1	A	TRUE	E	COG1305@1|root,arCOG02486@2157|Archaea,2Y7MU@28890|Euryarchaeota,245YA@183980|Archaeoglobi	Transglutaminase/protease-like homologues	unknown			NZ_CP006577.1	2280374	2282884
WP_010879888.1	hypothetical protein	GCF_000734035.1	WP_048096400.1	A	TRUE	unknown	arCOG03835@1|root,arCOG03835@2157|Archaea	unknown	unknown			NZ_CP006577.1	2282874	2283920
WP_048096402.1	tRNA uridine(34) 5-carboxymethylaminomethyl modification radical SAM/GNAT enzyme Elp3	GCF_000734035.1	WP_048096400.1	A	TRUE	K	COG1243@1|root,arCOG01361@2157|Archaea,2XT9Z@28890|Euryarchaeota,245PE@183980|Archaeoglobi	histone acetyltransferase, ELP3 family	unknown		2.3.1.48	NZ_CP006577.1	2283935	2285488
WP_048201073.1	CO dehydrogenase/CO-methylating acetyl-CoA synthase complex subunit beta	GCF_000739065.1	WP_048201076.1	A	TRUE	C	COG1614@1|root,arCOG04360@2157|Archaea,2XU0D@28890|Euryarchaeota,23Q7P@183939|Methanococci	Part of a complex that catalyzes the reversible cleavage of acetyl-CoA, allowing autotrophic growth from CO(2). The alpha- epsilon complex generates CO from CO(2), while the beta subunit (this protein) combines the CO with CoA and a methyl group to form acetyl-CoA. The methyl group, which is incorporated into acetyl- CoA, is transferred to the beta subunit by a corrinoid iron-sulfur protein (the …	One carbon pool	ko00680,ko01120,ko01200,map00680,map01120,map01200	1.2.7.4	NZ_CP009149.1	10	1413
WP_048201073.1	CO dehydrogenase/CO-methylating acetyl-CoA synthase complex subunit beta	GCF_000739065.1	WP_048201076.1	A	TRUE	C	COG1614@1|root,arCOG04360@2157|Archaea,2XU0D@28890|Euryarchaeota,23Q7P@183939|Methanococci	Part of a complex that catalyzes the reversible cleavage of acetyl-CoA, allowing autotrophic growth from CO(2). The alpha- epsilon complex generates CO from CO(2), while the beta subunit (this protein) combines the CO with CoA and a methyl group to form acetyl-CoA. The methyl group, which is incorporated into acetyl- CoA, is transferred to the beta subunit by a corrinoid iron-sulfur protein (the …	One carbon pool	ko00680,ko01120,ko01200,map00680,map01120,map01200	1.2.7.4	NZ_CP009149.1	10	1413
WP_048201074.1	4Fe-4S dicluster domain-containing protein	GCF_000739065.1	WP_048201076.1	A	TRUE	C	COG1142@1|root,arCOG01502@2157|Archaea,2XXPM@28890|Euryarchaeota,23QVU@183939|Methanococci	PFAM 4Fe-4S ferredoxin, iron-sulfur binding domain protein	FeS			NZ_CP009149.1	1438	1893
WP_048201075.1	CO dehydrogenase/acetyl-CoA synthase complex subunit epsilon	GCF_000739065.1	WP_048201076.1	A	TRUE	C	COG1880@1|root,arCOG04408@2157|Archaea,2XZG7@28890|Euryarchaeota,23R6S@183939|Methanococci	PFAM CO dehydrogenase beta subunit acetyl-CoA synthase epsilon subunit	One carbon pool	ko00680,ko01120,ko01200,map00680,map01120,map01200		NZ_CP009149.1	1895	2335
WP_048201075.1	CO dehydrogenase/acetyl-CoA synthase complex subunit epsilon	GCF_000739065.1	WP_048201076.1	A	TRUE	C	COG1880@1|root,arCOG04408@2157|Archaea,2XZG7@28890|Euryarchaeota,23R6S@183939|Methanococci	PFAM CO dehydrogenase beta subunit acetyl-CoA synthase epsilon subunit	One carbon pool	ko00680,ko01120,ko01200,map00680,map01120,map01200		NZ_CP009149.1	1895	2335
WP_048201076.1	CO dehydrogenase/acetyl-CoA synthase complex subunit alpha	GCF_000739065.1	WP_048201076.1	A	FALSE	unknown		unknown	CODH			NZ_CP009149.1	2491	4818
WP_081874434.1	acetyl-CoA decarbonylase/synthase complex subunit alpha/beta	GCF_000739065.1	WP_048201076.1	A	TRUE	C	COG1152@1|root,COG1614@1|root,arCOG02428@2157|Archaea,arCOG04360@2157|Archaea,2XU0D@28890|Euryarchaeota,23Q7P@183939|Methanococci	Part of a complex that catalyzes the reversible cleavage of acetyl-CoA, allowing autotrophic growth from CO(2). The alpha- epsilon complex generates CO from CO(2), while the beta subunit (this protein) combines the CO with CoA and a methyl group to form acetyl-CoA. The methyl group, which is incorporated into acetyl- CoA, is transferred to the beta subunit by a corrinoid iron-sulfur protein (the …	One carbon pool	ko00680,ko01120,ko01200,map00680,map01120,map01200	1.2.7.4	NZ_CP009149.1	5059	7275
WP_081874434.1	acetyl-CoA decarbonylase/synthase complex subunit alpha/beta	GCF_000739065.1	WP_048201076.1	A	TRUE	C	COG1152@1|root,COG1614@1|root,arCOG02428@2157|Archaea,arCOG04360@2157|Archaea,2XU0D@28890|Euryarchaeota,23Q7P@183939|Methanococci	Part of a complex that catalyzes the reversible cleavage of acetyl-CoA, allowing autotrophic growth from CO(2). The alpha- epsilon complex generates CO from CO(2), while the beta subunit (this protein) combines the CO with CoA and a methyl group to form acetyl-CoA. The methyl group, which is incorporated into acetyl- CoA, is transferred to the beta subunit by a corrinoid iron-sulfur protein (the …	One carbon pool	ko00680,ko01120,ko01200,map00680,map01120,map01200	1.2.7.4	NZ_CP009149.1	5059	7275
WP_048201077.1	HTH-type transcriptional regulator Ptr1	GCF_000739065.1	WP_048201076.1	A	TRUE	K	COG1522@1|root,arCOG01580@2157|Archaea,2XWVQ@28890|Euryarchaeota	COG1522 Transcriptional regulators	unknown			NZ_CP009149.1	7556	8002
WP_048201078.1	V4R domain-containing protein	GCF_000739065.1	WP_048201076.1	A	TRUE	K	COG1719@1|root,arCOG01688@2157|Archaea	PFAM 4-vinyl reductase, 4VR	Regulation			NZ_CP009149.1	8007	8513
WP_048194329.1	CO dehydrogenase/acetyl-CoA synthase complex subunit alpha	GCF_000765475.1	WP_048194329.1	A	FALSE	unknown		unknown	CODH			NZ_JRHO01000013.1	53119	55527
WP_048194332.1	CO dehydrogenase/acetyl-CoA synthase complex subunit epsilon	GCF_000765475.1	WP_048194329.1	A	TRUE	C	COG1880@1|root,arCOG04408@2157|Archaea,2XWPE@28890|Euryarchaeota,2NA4Z@224756|Methanomicrobia	Part of a complex that catalyzes the reversible cleavage of acetyl-CoA, allowing growth on acetate as sole source of carbon and energy. The alpha-epsilon subcomponent functions as a carbon monoxide dehydrogenase. The precise role of the epsilon subunit is unclear	One carbon pool	ko00680,ko01120,ko01200,map00680,map01120,map01200		NZ_JRHO01000013.1	55530	56045
WP_048194332.1	CO dehydrogenase/acetyl-CoA synthase complex subunit epsilon	GCF_000765475.1	WP_048194329.1	A	TRUE	C	COG1880@1|root,arCOG04408@2157|Archaea,2XWPE@28890|Euryarchaeota,2NA4Z@224756|Methanomicrobia	Part of a complex that catalyzes the reversible cleavage of acetyl-CoA, allowing growth on acetate as sole source of carbon and energy. The alpha-epsilon subcomponent functions as a carbon monoxide dehydrogenase. The precise role of the epsilon subunit is unclear	One carbon pool	ko00680,ko01120,ko01200,map00680,map01120,map01200		NZ_JRHO01000013.1	55530	56045
WP_048194334.1	CO dehydrogenase/CO-methylating acetyl-CoA synthase complex subunit beta	GCF_000765475.1	WP_048194329.1	A	TRUE	C	COG1614@1|root,arCOG04360@2157|Archaea,2XU0D@28890|Euryarchaeota,2N95I@224756|Methanomicrobia	Part of a complex that catalyzes the reversible cleavage of acetyl-CoA, allowing growth on acetate as sole source of carbon and energy. The alpha-epsilon complex generates CO from CO(2), while the beta subunit (this protein) combines the CO with CoA and a methyl group to form acetyl-CoA. The methyl group, which is incorporated into acetyl-CoA, is transferred to the beta subunit by a corrinoid iro…	One carbon pool	ko00680,ko01120,ko01200,map00680,map01120,map01200		NZ_JRHO01000013.1	56108	57517
WP_048194334.1	CO dehydrogenase/CO-methylating acetyl-CoA synthase complex subunit beta	GCF_000765475.1	WP_048194329.1	A	TRUE	C	COG1614@1|root,arCOG04360@2157|Archaea,2XU0D@28890|Euryarchaeota,2N95I@224756|Methanomicrobia	Part of a complex that catalyzes the reversible cleavage of acetyl-CoA, allowing growth on acetate as sole source of carbon and energy. The alpha-epsilon complex generates CO from CO(2), while the beta subunit (this protein) combines the CO with CoA and a methyl group to form acetyl-CoA. The methyl group, which is incorporated into acetyl-CoA, is transferred to the beta subunit by a corrinoid iro…	One carbon pool	ko00680,ko01120,ko01200,map00680,map01120,map01200		NZ_JRHO01000013.1	56108	57517
WP_048194336.1	AAA family ATPase	GCF_000765475.1	WP_048194329.1	A	TRUE	D	COG3640@1|root,arCOG00587@2157|Archaea,2XT61@28890|Euryarchaeota,2N9QI@224756|Methanomicrobia	AAA domain	CooC			NZ_JRHO01000013.1	57530	58282
WP_048194338.1	CO dehydrogenase/acetyl-CoA synthase subunit delta	GCF_000765475.1	WP_048194329.1	A	TRUE	C	COG2069@1|root,arCOG01980@2157|Archaea,2XTXS@28890|Euryarchaeota,2N93F@224756|Methanomicrobia	Part of a complex that catalyzes the reversible cleavage of acetyl-CoA, allowing	One carbon pool	ko00680,ko00720,ko01120,ko01200,map00680,map00720,map01120,map01200	2.1.1.245	NZ_JRHO01000013.1	58323	59639
WP_048194338.1	CO dehydrogenase/acetyl-CoA synthase subunit delta	GCF_000765475.1	WP_048194329.1	A	TRUE	C	COG2069@1|root,arCOG01980@2157|Archaea,2XTXS@28890|Euryarchaeota,2N93F@224756|Methanomicrobia	Part of a complex that catalyzes the reversible cleavage of acetyl-CoA, allowing	One carbon pool	ko00680,ko00720,ko01120,ko01200,map00680,map00720,map01120,map01200	2.1.1.245	NZ_JRHO01000013.1	58323	59639
WP_048194340.1	acetyl-CoA decarbonylase/synthase complex subunit gamma	GCF_000765475.1	WP_048194329.1	A	TRUE	C	COG1456@1|root,arCOG01979@2157|Archaea,2XUSG@28890|Euryarchaeota,2N9BD@224756|Methanomicrobia	Part of a complex that catalyzes the reversible cleavage of acetyl-CoA, allowing	One carbon pool	ko00680,ko00720,ko01120,ko01200,map00680,map00720,map01120,map01200	2.1.1.245	NZ_JRHO01000013.1	59643	61052
WP_048194340.1	acetyl-CoA decarbonylase/synthase complex subunit gamma	GCF_000765475.1	WP_048194329.1	A	TRUE	C	COG1456@1|root,arCOG01979@2157|Archaea,2XUSG@28890|Euryarchaeota,2N9BD@224756|Methanomicrobia	Part of a complex that catalyzes the reversible cleavage of acetyl-CoA, allowing	One carbon pool	ko00680,ko00720,ko01120,ko01200,map00680,map00720,map01120,map01200	2.1.1.245	NZ_JRHO01000013.1	59643	61052
WP_048194342.1	alpha/beta hydrolase	GCF_000765475.1	WP_048194329.1	A	TRUE	S	COG1073@1|root,arCOG01654@2157|Archaea,2Y0NH@28890|Euryarchaeota,2NA0N@224756|Methanomicrobia	Acetyl xylan esterase (AXE1)	Hydrolase			NZ_JRHO01000013.1	61125	62060
2	acetyl-CoA decarbonylase/synthase complex subunit gamma	GCF_000969905.1	WP_048122585.1	A	TRUE	unknown		unknown	One carbon pool			NZ_CP009520.1	3891888	3893297
2	acetyl-CoA decarbonylase/synthase complex subunit gamma	GCF_000969905.1	WP_048122585.1	A	TRUE	unknown		unknown	One carbon pool			NZ_CP009520.1	3891888	3893297
2	CO dehydrogenase/acetyl-CoA synthase subunit delta	GCF_000969905.1	WP_048122585.1	A	TRUE	unknown		unknown	One carbon pool			NZ_CP009520.1	3893301	3894626
2	CO dehydrogenase/acetyl-CoA synthase subunit delta	GCF_000969905.1	WP_048122585.1	A	TRUE	unknown		unknown	One carbon pool			NZ_CP009520.1	3893301	3894626
WP_048122579.1	AAA family ATPase	GCF_000969905.1	WP_048122585.1	A	TRUE	D	COG3640@1|root,arCOG00587@2157|Archaea,2XT61@28890|Euryarchaeota,2N9QI@224756|Methanomicrobia	AAA domain	CooC			NZ_CP009520.1	3894872	3895633
WP_048122581.1	CO dehydrogenase/CO-methylating acetyl-CoA synthase complex subunit beta	GCF_000969905.1	WP_048122585.1	A	TRUE	C	COG1614@1|root,arCOG04360@2157|Archaea,2XU0D@28890|Euryarchaeota,2N95I@224756|Methanomicrobia	Part of a complex that catalyzes the reversible cleavage of acetyl-CoA, allowing growth on acetate as sole source of carbon and energy. The alpha-epsilon complex generates CO from CO(2), while the beta subunit (this protein) combines the CO with CoA and a methyl group to form acetyl-CoA. The methyl group, which is incorporated into acetyl-CoA, is transferred to the beta subunit by a corrinoid iro…	One carbon pool	ko00680,ko01120,ko01200,map00680,map01120,map01200		NZ_CP009520.1	3895692	3897104
WP_048122581.1	CO dehydrogenase/CO-methylating acetyl-CoA synthase complex subunit beta	GCF_000969905.1	WP_048122585.1	A	TRUE	C	COG1614@1|root,arCOG04360@2157|Archaea,2XU0D@28890|Euryarchaeota,2N95I@224756|Methanomicrobia	Part of a complex that catalyzes the reversible cleavage of acetyl-CoA, allowing growth on acetate as sole source of carbon and energy. The alpha-epsilon complex generates CO from CO(2), while the beta subunit (this protein) combines the CO with CoA and a methyl group to form acetyl-CoA. The methyl group, which is incorporated into acetyl-CoA, is transferred to the beta subunit by a corrinoid iro…	One carbon pool	ko00680,ko01120,ko01200,map00680,map01120,map01200		NZ_CP009520.1	3895692	3897104
WP_048122583.1	CO dehydrogenase/acetyl-CoA synthase complex subunit epsilon	GCF_000969905.1	WP_048122585.1	A	TRUE	C	COG1880@1|root,arCOG04408@2157|Archaea,2XWPE@28890|Euryarchaeota,2NA4Z@224756|Methanomicrobia	Part of a complex that catalyzes the reversible cleavage of acetyl-CoA, allowing growth on acetate as sole source of carbon and energy. The alpha-epsilon subcomponent functions as a carbon monoxide dehydrogenase. The precise role of the epsilon subunit is unclear	One carbon pool	ko00680,ko01120,ko01200,map00680,map01120,map01200		NZ_CP009520.1	3897129	3897641
WP_048122583.1	CO dehydrogenase/acetyl-CoA synthase complex subunit epsilon	GCF_000969905.1	WP_048122585.1	A	TRUE	C	COG1880@1|root,arCOG04408@2157|Archaea,2XWPE@28890|Euryarchaeota,2NA4Z@224756|Methanomicrobia	Part of a complex that catalyzes the reversible cleavage of acetyl-CoA, allowing growth on acetate as sole source of carbon and energy. The alpha-epsilon subcomponent functions as a carbon monoxide dehydrogenase. The precise role of the epsilon subunit is unclear	One carbon pool	ko00680,ko01120,ko01200,map00680,map01120,map01200		NZ_CP009520.1	3897129	3897641
WP_048122585.1	CO dehydrogenase/acetyl-CoA synthase complex subunit alpha	GCF_000969905.1	WP_048122585.1	A	FALSE	unknown		unknown	CODH			NZ_CP009520.1	3897647	3900067
WP_148704394.1	CO dehydrogenase/acetyl-CoA synthase complex subunit alpha	GCF_000969925.1	WP_148704394.1	A	FALSE	unknown		unknown	CODH			NZ_CP009502.1	1179354	1181765
WP_048168057.1	CO dehydrogenase/acetyl-CoA synthase complex subunit epsilon	GCF_000969925.1	WP_148704394.1	A	TRUE	C	COG1880@1|root,arCOG04408@2157|Archaea,2XWPE@28890|Euryarchaeota,2NA4Z@224756|Methanomicrobia	Part of a complex that catalyzes the reversible cleavage of acetyl-CoA, allowing growth on acetate as sole source of carbon and energy. The alpha-epsilon subcomponent functions as a carbon monoxide dehydrogenase. The precise role of the epsilon subunit is unclear	One carbon pool	ko00680,ko01120,ko01200,map00680,map01120,map01200		NZ_CP009502.1	1181768	1182280
WP_048168057.1	CO dehydrogenase/acetyl-CoA synthase complex subunit epsilon	GCF_000969925.1	WP_148704394.1	A	TRUE	C	COG1880@1|root,arCOG04408@2157|Archaea,2XWPE@28890|Euryarchaeota,2NA4Z@224756|Methanomicrobia	Part of a complex that catalyzes the reversible cleavage of acetyl-CoA, allowing growth on acetate as sole source of carbon and energy. The alpha-epsilon subcomponent functions as a carbon monoxide dehydrogenase. The precise role of the epsilon subunit is unclear	One carbon pool	ko00680,ko01120,ko01200,map00680,map01120,map01200		NZ_CP009502.1	1181768	1182280
WP_048168056.1	CO dehydrogenase/CO-methylating acetyl-CoA synthase complex subunit beta	GCF_000969925.1	WP_148704394.1	A	TRUE	C	COG1614@1|root,arCOG04360@2157|Archaea,2XU0D@28890|Euryarchaeota,2N95I@224756|Methanomicrobia	Part of a complex that catalyzes the reversible cleavage of acetyl-CoA, allowing growth on acetate as sole source of carbon and energy. The alpha-epsilon complex generates CO from CO(2), while the beta subunit (this protein) combines the CO with CoA and a methyl group to form acetyl-CoA. The methyl group, which is incorporated into acetyl-CoA, is transferred to the beta subunit by a corrinoid iro…	One carbon pool	ko00680,ko01120,ko01200,map00680,map01120,map01200		NZ_CP009502.1	1182301	1183719
WP_048168056.1	CO dehydrogenase/CO-methylating acetyl-CoA synthase complex subunit beta	GCF_000969925.1	WP_148704394.1	A	TRUE	C	COG1614@1|root,arCOG04360@2157|Archaea,2XU0D@28890|Euryarchaeota,2N95I@224756|Methanomicrobia	Part of a complex that catalyzes the reversible cleavage of acetyl-CoA, allowing growth on acetate as sole source of carbon and energy. The alpha-epsilon complex generates CO from CO(2), while the beta subunit (this protein) combines the CO with CoA and a methyl group to form acetyl-CoA. The methyl group, which is incorporated into acetyl-CoA, is transferred to the beta subunit by a corrinoid iro…	One carbon pool	ko00680,ko01120,ko01200,map00680,map01120,map01200		NZ_CP009502.1	1182301	1183719
WP_048168055.1	AAA family ATPase	GCF_000969925.1	WP_148704394.1	A	TRUE	D	COG3640@1|root,arCOG00587@2157|Archaea,2XT61@28890|Euryarchaeota,2N9QI@224756|Methanomicrobia	AAA domain	CooC			NZ_CP009502.1	1183782	1184543
WP_048168054.1	CO dehydrogenase/acetyl-CoA synthase subunit delta	GCF_000969925.1	WP_148704394.1	A	TRUE	C	COG2069@1|root,arCOG01980@2157|Archaea,2XTXS@28890|Euryarchaeota,2N93F@224756|Methanomicrobia	Part of a complex that catalyzes the reversible cleavage of acetyl-CoA, allowing	One carbon pool	ko00680,ko00720,ko01120,ko01200,map00680,map00720,map01120,map01200	2.1.1.245	NZ_CP009502.1	1184819	1186132
WP_048168054.1	CO dehydrogenase/acetyl-CoA synthase subunit delta	GCF_000969925.1	WP_148704394.1	A	TRUE	C	COG2069@1|root,arCOG01980@2157|Archaea,2XTXS@28890|Euryarchaeota,2N93F@224756|Methanomicrobia	Part of a complex that catalyzes the reversible cleavage of acetyl-CoA, allowing	One carbon pool	ko00680,ko00720,ko01120,ko01200,map00680,map00720,map01120,map01200	2.1.1.245	NZ_CP009502.1	1184819	1186132
WP_048168053.1	acetyl-CoA decarbonylase/synthase complex subunit gamma	GCF_000969925.1	WP_148704394.1	A	TRUE	C	COG1456@1|root,arCOG01979@2157|Archaea,2XUSG@28890|Euryarchaeota,2N9BD@224756|Methanomicrobia	Part of a complex that catalyzes the reversible cleavage of acetyl-CoA, allowing	One carbon pool	ko00680,ko00720,ko01120,ko01200,map00680,map00720,map01120,map01200	2.1.1.245	NZ_CP009502.1	1186136	1187545
WP_048168053.1	acetyl-CoA decarbonylase/synthase complex subunit gamma	GCF_000969925.1	WP_148704394.1	A	TRUE	C	COG1456@1|root,arCOG01979@2157|Archaea,2XUSG@28890|Euryarchaeota,2N9BD@224756|Methanomicrobia	Part of a complex that catalyzes the reversible cleavage of acetyl-CoA, allowing	One carbon pool	ko00680,ko00720,ko01120,ko01200,map00680,map00720,map01120,map01200	2.1.1.245	NZ_CP009502.1	1186136	1187545
WP_011305469.1	CO dehydrogenase/acetyl-CoA synthase complex subunit alpha	GCF_000969985.1	WP_011305469.1	A	FALSE	unknown		unknown	CODH			NZ_CP009526.1	662185	664605
WP_011305468.1	CO dehydrogenase/acetyl-CoA synthase complex subunit epsilon	GCF_000969985.1	WP_011305469.1	A	TRUE	C	COG1880@1|root,arCOG04408@2157|Archaea,2XWPE@28890|Euryarchaeota,2NA4Z@224756|Methanomicrobia	Part of a complex that catalyzes the reversible cleavage of acetyl-CoA, allowing growth on acetate as sole source of carbon and energy. The alpha-epsilon subcomponent functions as a carbon monoxide dehydrogenase. The precise role of the epsilon subunit is unclear	One carbon pool	ko00680,ko01120,ko01200,map00680,map01120,map01200		NZ_CP009526.1	664608	665120
WP_011305468.1	CO dehydrogenase/acetyl-CoA synthase complex subunit epsilon	GCF_000969985.1	WP_011305469.1	A	TRUE	C	COG1880@1|root,arCOG04408@2157|Archaea,2XWPE@28890|Euryarchaeota,2NA4Z@224756|Methanomicrobia	Part of a complex that catalyzes the reversible cleavage of acetyl-CoA, allowing growth on acetate as sole source of carbon and energy. The alpha-epsilon subcomponent functions as a carbon monoxide dehydrogenase. The precise role of the epsilon subunit is unclear	One carbon pool	ko00680,ko01120,ko01200,map00680,map01120,map01200		NZ_CP009526.1	664608	665120
WP_011305467.1	CO dehydrogenase/CO-methylating acetyl-CoA synthase complex subunit beta	GCF_000969985.1	WP_011305469.1	A	TRUE	C	COG1614@1|root,arCOG04360@2157|Archaea,2XU0D@28890|Euryarchaeota,2N95I@224756|Methanomicrobia	Part of a complex that catalyzes the reversible cleavage of acetyl-CoA, allowing growth on acetate as sole source of carbon and energy. The alpha-epsilon complex generates CO from CO(2), while the beta subunit (this protein) combines the CO with CoA and a methyl group to form acetyl-CoA. The methyl group, which is incorporated into acetyl-CoA, is transferred to the beta subunit by a corrinoid iro…	One carbon pool	ko00680,ko01120,ko01200,map00680,map01120,map01200		NZ_CP009526.1	665145	666563
WP_011305467.1	CO dehydrogenase/CO-methylating acetyl-CoA synthase complex subunit beta	GCF_000969985.1	WP_011305469.1	A	TRUE	C	COG1614@1|root,arCOG04360@2157|Archaea,2XU0D@28890|Euryarchaeota,2N95I@224756|Methanomicrobia	Part of a complex that catalyzes the reversible cleavage of acetyl-CoA, allowing growth on acetate as sole source of carbon and energy. The alpha-epsilon complex generates CO from CO(2), while the beta subunit (this protein) combines the CO with CoA and a methyl group to form acetyl-CoA. The methyl group, which is incorporated into acetyl-CoA, is transferred to the beta subunit by a corrinoid iro…	One carbon pool	ko00680,ko01120,ko01200,map00680,map01120,map01200		NZ_CP009526.1	665145	666563
WP_011305466.1	AAA family ATPase	GCF_000969985.1	WP_011305469.1	A	TRUE	D	COG3640@1|root,arCOG00587@2157|Archaea,2XT61@28890|Euryarchaeota,2N9QI@224756|Methanomicrobia	AAA domain	CooC			NZ_CP009526.1	666620	667381
WP_148705895.1	CO dehydrogenase/acetyl-CoA synthase complex subunit alpha	GCF_000970125.1	WP_148705895.1	A	FALSE	unknown		unknown	CODH			NZ_CP009507.1	3979951	3982368
WP_048173697.1	CO dehydrogenase/acetyl-CoA synthase complex subunit epsilon	GCF_000970125.1	WP_148705895.1	A	TRUE	C	COG1880@1|root,arCOG04408@2157|Archaea,2XWPE@28890|Euryarchaeota,2NA4Z@224756|Methanomicrobia	Part of a complex that catalyzes the reversible cleavage of acetyl-CoA, allowing growth on acetate as sole source of carbon and energy. The alpha-epsilon subcomponent functions as a carbon monoxide dehydrogenase. The precise role of the epsilon subunit is unclear	One carbon pool	ko00680,ko01120,ko01200,map00680,map01120,map01200		NZ_CP009507.1	3982371	3982883
WP_048173697.1	CO dehydrogenase/acetyl-CoA synthase complex subunit epsilon	GCF_000970125.1	WP_148705895.1	A	TRUE	C	COG1880@1|root,arCOG04408@2157|Archaea,2XWPE@28890|Euryarchaeota,2NA4Z@224756|Methanomicrobia	Part of a complex that catalyzes the reversible cleavage of acetyl-CoA, allowing growth on acetate as sole source of carbon and energy. The alpha-epsilon subcomponent functions as a carbon monoxide dehydrogenase. The precise role of the epsilon subunit is unclear	One carbon pool	ko00680,ko01120,ko01200,map00680,map01120,map01200		NZ_CP009507.1	3982371	3982883
WP_048184650.1	CO dehydrogenase/CO-methylating acetyl-CoA synthase complex subunit beta	GCF_000970125.1	WP_148705895.1	A	TRUE	C	COG1614@1|root,arCOG04360@2157|Archaea,2XU0D@28890|Euryarchaeota,2N95I@224756|Methanomicrobia	Part of a complex that catalyzes the reversible cleavage of acetyl-CoA, allowing growth on acetate as sole source of carbon and energy. The alpha-epsilon complex generates CO from CO(2), while the beta subunit (this protein) combines the CO with CoA and a methyl group to form acetyl-CoA. The methyl group, which is incorporated into acetyl-CoA, is transferred to the beta subunit by a corrinoid iro…	One carbon pool	ko00680,ko01120,ko01200,map00680,map01120,map01200		NZ_CP009507.1	3982908	3984320
WP_048184650.1	CO dehydrogenase/CO-methylating acetyl-CoA synthase complex subunit beta	GCF_000970125.1	WP_148705895.1	A	TRUE	C	COG1614@1|root,arCOG04360@2157|Archaea,2XU0D@28890|Euryarchaeota,2N95I@224756|Methanomicrobia	Part of a complex that catalyzes the reversible cleavage of acetyl-CoA, allowing growth on acetate as sole source of carbon and energy. The alpha-epsilon complex generates CO from CO(2), while the beta subunit (this protein) combines the CO with CoA and a methyl group to form acetyl-CoA. The methyl group, which is incorporated into acetyl-CoA, is transferred to the beta subunit by a corrinoid iro…	One carbon pool	ko00680,ko01120,ko01200,map00680,map01120,map01200		NZ_CP009507.1	3982908	3984320
WP_048173699.1	carbon monoxide dehydrogenase accessory protein CooC	GCF_000970125.1	WP_148705895.1	A	TRUE	D	COG3640@1|root,arCOG00587@2157|Archaea,2XT61@28890|Euryarchaeota,2N9QI@224756|Methanomicrobia	AAA domain	CooC			NZ_CP009507.1	3984397	3985158
MSSIH_RS16870	CO dehydrogenase/acetyl-CoA synthase subunit delta	GCF_000970125.1	WP_148705895.1	A	TRUE	unknown		unknown	One carbon pool			NZ_CP009507.1	3985406	3986715
MSSIH_RS16870	CO dehydrogenase/acetyl-CoA synthase subunit delta	GCF_000970125.1	WP_148705895.1	A	TRUE	unknown		unknown	One carbon pool			NZ_CP009507.1	3985406	3986715
2	acetyl-CoA decarbonylase/synthase complex subunit gamma	GCF_000970125.1	WP_148705895.1	A	TRUE	unknown		unknown	One carbon pool			NZ_CP009507.1	3986719	3988125
2	acetyl-CoA decarbonylase/synthase complex subunit gamma	GCF_000970125.1	WP_148705895.1	A	TRUE	unknown		unknown	One carbon pool			NZ_CP009507.1	3986719	3988125
WP_048184531.1	CO dehydrogenase/acetyl-CoA synthase complex subunit alpha	GCF_000970145.1	WP_048184531.1	A	FALSE	unknown		unknown	CODH			NZ_CP009508.1	4240524	4242944
WP_048184533.1	CO dehydrogenase/acetyl-CoA synthase complex subunit epsilon	GCF_000970145.1	WP_048184531.1	A	TRUE	C	COG1880@1|root,arCOG04408@2157|Archaea,2XWPE@28890|Euryarchaeota,2NA4Z@224756|Methanomicrobia	Part of a complex that catalyzes the reversible cleavage of acetyl-CoA, allowing growth on acetate as sole source of carbon and energy. The alpha-epsilon subcomponent functions as a carbon monoxide dehydrogenase. The precise role of the epsilon subunit is unclear	One carbon pool	ko00680,ko01120,ko01200,map00680,map01120,map01200		NZ_CP009508.1	4242947	4243459
WP_048184533.1	CO dehydrogenase/acetyl-CoA synthase complex subunit epsilon	GCF_000970145.1	WP_048184531.1	A	TRUE	C	COG1880@1|root,arCOG04408@2157|Archaea,2XWPE@28890|Euryarchaeota,2NA4Z@224756|Methanomicrobia	Part of a complex that catalyzes the reversible cleavage of acetyl-CoA, allowing growth on acetate as sole source of carbon and energy. The alpha-epsilon subcomponent functions as a carbon monoxide dehydrogenase. The precise role of the epsilon subunit is unclear	One carbon pool	ko00680,ko01120,ko01200,map00680,map01120,map01200		NZ_CP009508.1	4242947	4243459
WP_048184534.1	CO dehydrogenase/CO-methylating acetyl-CoA synthase complex subunit beta	GCF_000970145.1	WP_048184531.1	A	TRUE	C	COG1614@1|root,arCOG04360@2157|Archaea,2XU0D@28890|Euryarchaeota,2N95I@224756|Methanomicrobia	Part of a complex that catalyzes the reversible cleavage of acetyl-CoA, allowing growth on acetate as sole source of carbon and energy. The alpha-epsilon complex generates CO from CO(2), while the beta subunit (this protein) combines the CO with CoA and a methyl group to form acetyl-CoA. The methyl group, which is incorporated into acetyl-CoA, is transferred to the beta subunit by a corrinoid iro…	One carbon pool	ko00680,ko01120,ko01200,map00680,map01120,map01200		NZ_CP009508.1	4243484	4244893
WP_048184534.1	CO dehydrogenase/CO-methylating acetyl-CoA synthase complex subunit beta	GCF_000970145.1	WP_048184531.1	A	TRUE	C	COG1614@1|root,arCOG04360@2157|Archaea,2XU0D@28890|Euryarchaeota,2N95I@224756|Methanomicrobia	Part of a complex that catalyzes the reversible cleavage of acetyl-CoA, allowing growth on acetate as sole source of carbon and energy. The alpha-epsilon complex generates CO from CO(2), while the beta subunit (this protein) combines the CO with CoA and a methyl group to form acetyl-CoA. The methyl group, which is incorporated into acetyl-CoA, is transferred to the beta subunit by a corrinoid iro…	One carbon pool	ko00680,ko01120,ko01200,map00680,map01120,map01200		NZ_CP009508.1	4243484	4244893
WP_048173558.1	AAA family ATPase	GCF_000970145.1	WP_048184531.1	A	TRUE	D	COG3640@1|root,arCOG00587@2157|Archaea,2XT61@28890|Euryarchaeota,2N9QI@224756|Methanomicrobia	AAA domain	CooC			NZ_CP009508.1	4244970	4245731
WP_048173559.1	hypothetical protein	GCF_000970145.1	WP_048184531.1	A	TRUE	C	COG2069@1|root,arCOG01980@2157|Archaea,2XTXS@28890|Euryarchaeota,2N93F@224756|Methanomicrobia	Part of a complex that catalyzes the reversible cleavage of acetyl-CoA, allowing	One carbon pool	ko00680,ko00720,ko01120,ko01200,map00680,map00720,map01120,map01200	2.1.1.245	NZ_CP009508.1	4245774	4245983
WP_048173559.1	hypothetical protein	GCF_000970145.1	WP_048184531.1	A	TRUE	C	COG2069@1|root,arCOG01980@2157|Archaea,2XTXS@28890|Euryarchaeota,2N93F@224756|Methanomicrobia	Part of a complex that catalyzes the reversible cleavage of acetyl-CoA, allowing	One carbon pool	ko00680,ko00720,ko01120,ko01200,map00680,map00720,map01120,map01200	2.1.1.245	NZ_CP009508.1	4245774	4245983
WP_048186149.1	CO dehydrogenase/acetyl-CoA synthase subunit delta	GCF_000970145.1	WP_048184531.1	A	TRUE	C	COG2069@1|root,arCOG01980@2157|Archaea,2XTXS@28890|Euryarchaeota,2N93F@224756|Methanomicrobia	Part of a complex that catalyzes the reversible cleavage of acetyl-CoA, allowing	One carbon pool	ko00680,ko00720,ko01120,ko01200,map00680,map00720,map01120,map01200	2.1.1.245	NZ_CP009508.1	4246180	4247490
WP_048186149.1	CO dehydrogenase/acetyl-CoA synthase subunit delta	GCF_000970145.1	WP_048184531.1	A	TRUE	C	COG2069@1|root,arCOG01980@2157|Archaea,2XTXS@28890|Euryarchaeota,2N93F@224756|Methanomicrobia	Part of a complex that catalyzes the reversible cleavage of acetyl-CoA, allowing	One carbon pool	ko00680,ko00720,ko01120,ko01200,map00680,map00720,map01120,map01200	2.1.1.245	NZ_CP009508.1	4246180	4247490
WP_048173560.1	acetyl-CoA decarbonylase/synthase complex subunit gamma	GCF_000970145.1	WP_048184531.1	A	TRUE	C	COG1456@1|root,arCOG01979@2157|Archaea,2XUSG@28890|Euryarchaeota,2N9BD@224756|Methanomicrobia	Part of a complex that catalyzes the reversible cleavage of acetyl-CoA, allowing	One carbon pool	ko00680,ko00720,ko01120,ko01200,map00680,map00720,map01120,map01200	2.1.1.245	NZ_CP009508.1	4247494	4248900
WP_048173560.1	acetyl-CoA decarbonylase/synthase complex subunit gamma	GCF_000970145.1	WP_048184531.1	A	TRUE	C	COG1456@1|root,arCOG01979@2157|Archaea,2XUSG@28890|Euryarchaeota,2N9BD@224756|Methanomicrobia	Part of a complex that catalyzes the reversible cleavage of acetyl-CoA, allowing	One carbon pool	ko00680,ko00720,ko01120,ko01200,map00680,map00720,map01120,map01200	2.1.1.245	NZ_CP009508.1	4247494	4248900
WP_048124708.1	acetyl-CoA decarbonylase/synthase complex subunit gamma	GCF_000970265.1	WP_048124713.1	A	TRUE	C	COG1456@1|root,arCOG01979@2157|Archaea,2XUSG@28890|Euryarchaeota,2N9BD@224756|Methanomicrobia	Part of a complex that catalyzes the reversible cleavage of acetyl-CoA, allowing	One carbon pool	ko00680,ko00720,ko01120,ko01200,map00680,map00720,map01120,map01200	2.1.1.245	NZ_CP009515.1	786623	788032
WP_048124708.1	acetyl-CoA decarbonylase/synthase complex subunit gamma	GCF_000970265.1	WP_048124713.1	A	TRUE	C	COG1456@1|root,arCOG01979@2157|Archaea,2XUSG@28890|Euryarchaeota,2N9BD@224756|Methanomicrobia	Part of a complex that catalyzes the reversible cleavage of acetyl-CoA, allowing	One carbon pool	ko00680,ko00720,ko01120,ko01200,map00680,map00720,map01120,map01200	2.1.1.245	NZ_CP009515.1	786623	788032
WP_048124709.1	CO dehydrogenase/acetyl-CoA synthase subunit delta	GCF_000970265.1	WP_048124713.1	A	TRUE	C	COG2069@1|root,arCOG01980@2157|Archaea,2XTXS@28890|Euryarchaeota,2N93F@224756|Methanomicrobia	Part of a complex that catalyzes the reversible cleavage of acetyl-CoA, allowing	One carbon pool	ko00680,ko00720,ko01120,ko01200,map00680,map00720,map01120,map01200	2.1.1.245	NZ_CP009515.1	788036	789349
WP_048124709.1	CO dehydrogenase/acetyl-CoA synthase subunit delta	GCF_000970265.1	WP_048124713.1	A	TRUE	C	COG2069@1|root,arCOG01980@2157|Archaea,2XTXS@28890|Euryarchaeota,2N93F@224756|Methanomicrobia	Part of a complex that catalyzes the reversible cleavage of acetyl-CoA, allowing	One carbon pool	ko00680,ko00720,ko01120,ko01200,map00680,map00720,map01120,map01200	2.1.1.245	NZ_CP009515.1	788036	789349
WP_048124710.1	carbon monoxide dehydrogenase accessory protein CooC	GCF_000970265.1	WP_048124713.1	A	TRUE	D	COG3640@1|root,arCOG00587@2157|Archaea,2XT61@28890|Euryarchaeota,2N9QI@224756|Methanomicrobia	AAA domain	CooC			NZ_CP009515.1	789597	790358
WP_048124711.1	CO dehydrogenase/CO-methylating acetyl-CoA synthase complex subunit beta	GCF_000970265.1	WP_048124713.1	A	TRUE	C	COG1614@1|root,arCOG04360@2157|Archaea,2XU0D@28890|Euryarchaeota,2N95I@224756|Methanomicrobia	Part of a complex that catalyzes the reversible cleavage of acetyl-CoA, allowing growth on acetate as sole source of carbon and energy. The alpha-epsilon complex generates CO from CO(2), while the beta subunit (this protein) combines the CO with CoA and a methyl group to form acetyl-CoA. The methyl group, which is incorporated into acetyl-CoA, is transferred to the beta subunit by a corrinoid iro…	One carbon pool	ko00680,ko01120,ko01200,map00680,map01120,map01200		NZ_CP009515.1	790415	791824
WP_048124711.1	CO dehydrogenase/CO-methylating acetyl-CoA synthase complex subunit beta	GCF_000970265.1	WP_048124713.1	A	TRUE	C	COG1614@1|root,arCOG04360@2157|Archaea,2XU0D@28890|Euryarchaeota,2N95I@224756|Methanomicrobia	Part of a complex that catalyzes the reversible cleavage of acetyl-CoA, allowing growth on acetate as sole source of carbon and energy. The alpha-epsilon complex generates CO from CO(2), while the beta subunit (this protein) combines the CO with CoA and a methyl group to form acetyl-CoA. The methyl group, which is incorporated into acetyl-CoA, is transferred to the beta subunit by a corrinoid iro…	One carbon pool	ko00680,ko01120,ko01200,map00680,map01120,map01200		NZ_CP009515.1	790415	791824
WP_048124712.1	CO dehydrogenase/acetyl-CoA synthase complex subunit epsilon	GCF_000970265.1	WP_048124713.1	A	TRUE	C	COG1880@1|root,arCOG04408@2157|Archaea,2XWPE@28890|Euryarchaeota,2NA4Z@224756|Methanomicrobia	Part of a complex that catalyzes the reversible cleavage of acetyl-CoA, allowing growth on acetate as sole source of carbon and energy. The alpha-epsilon subcomponent functions as a carbon monoxide dehydrogenase. The precise role of the epsilon subunit is unclear	One carbon pool	ko00680,ko01120,ko01200,map00680,map01120,map01200		NZ_CP009515.1	791849	792361
WP_048124712.1	CO dehydrogenase/acetyl-CoA synthase complex subunit epsilon	GCF_000970265.1	WP_048124713.1	A	TRUE	C	COG1880@1|root,arCOG04408@2157|Archaea,2XWPE@28890|Euryarchaeota,2NA4Z@224756|Methanomicrobia	Part of a complex that catalyzes the reversible cleavage of acetyl-CoA, allowing growth on acetate as sole source of carbon and energy. The alpha-epsilon subcomponent functions as a carbon monoxide dehydrogenase. The precise role of the epsilon subunit is unclear	One carbon pool	ko00680,ko01120,ko01200,map00680,map01120,map01200		NZ_CP009515.1	791849	792361
WP_048124713.1	CO dehydrogenase/acetyl-CoA synthase complex subunit alpha	GCF_000970265.1	WP_048124713.1	A	FALSE	unknown		unknown	CODH			NZ_CP009515.1	792364	794784
WP_048137523.1	acetyl-CoA decarbonylase/synthase complex subunit gamma	GCF_000970285.1	WP_048137534.1	A	TRUE	C	COG1456@1|root,arCOG01979@2157|Archaea,2XUSG@28890|Euryarchaeota,2N9BD@224756|Methanomicrobia	Part of a complex that catalyzes the reversible cleavage of acetyl-CoA, allowing	One carbon pool	ko00680,ko00720,ko01120,ko01200,map00680,map00720,map01120,map01200	2.1.1.245	NZ_CP009516.1	869441	870850
WP_048137523.1	acetyl-CoA decarbonylase/synthase complex subunit gamma	GCF_000970285.1	WP_048137534.1	A	TRUE	C	COG1456@1|root,arCOG01979@2157|Archaea,2XUSG@28890|Euryarchaeota,2N9BD@224756|Methanomicrobia	Part of a complex that catalyzes the reversible cleavage of acetyl-CoA, allowing	One carbon pool	ko00680,ko00720,ko01120,ko01200,map00680,map00720,map01120,map01200	2.1.1.245	NZ_CP009516.1	869441	870850
WP_048137525.1	CO dehydrogenase/acetyl-CoA synthase subunit delta	GCF_000970285.1	WP_048137534.1	A	TRUE	C	COG2069@1|root,arCOG01980@2157|Archaea,2XTXS@28890|Euryarchaeota,2N93F@224756|Methanomicrobia	Part of a complex that catalyzes the reversible cleavage of acetyl-CoA, allowing	One carbon pool	ko00680,ko00720,ko01120,ko01200,map00680,map00720,map01120,map01200	2.1.1.245	NZ_CP009516.1	870854	872167
WP_048137525.1	CO dehydrogenase/acetyl-CoA synthase subunit delta	GCF_000970285.1	WP_048137534.1	A	TRUE	C	COG2069@1|root,arCOG01980@2157|Archaea,2XTXS@28890|Euryarchaeota,2N93F@224756|Methanomicrobia	Part of a complex that catalyzes the reversible cleavage of acetyl-CoA, allowing	One carbon pool	ko00680,ko00720,ko01120,ko01200,map00680,map00720,map01120,map01200	2.1.1.245	NZ_CP009516.1	870854	872167
WP_048137527.1	AAA family ATPase	GCF_000970285.1	WP_048137534.1	A	TRUE	D	COG3640@1|root,arCOG00587@2157|Archaea,2XT61@28890|Euryarchaeota,2N9QI@224756|Methanomicrobia	AAA domain	CooC			NZ_CP009516.1	872417	873178
WP_048137529.1	CO dehydrogenase/CO-methylating acetyl-CoA synthase complex subunit beta	GCF_000970285.1	WP_048137534.1	A	TRUE	C	COG1614@1|root,arCOG04360@2157|Archaea,2XU0D@28890|Euryarchaeota,2N95I@224756|Methanomicrobia	Part of a complex that catalyzes the reversible cleavage of acetyl-CoA, allowing growth on acetate as sole source of carbon and energy. The alpha-epsilon complex generates CO from CO(2), while the beta subunit (this protein) combines the CO with CoA and a methyl group to form acetyl-CoA. The methyl group, which is incorporated into acetyl-CoA, is transferred to the beta subunit by a corrinoid iro…	One carbon pool	ko00680,ko01120,ko01200,map00680,map01120,map01200		NZ_CP009516.1	873234	874643
WP_048137529.1	CO dehydrogenase/CO-methylating acetyl-CoA synthase complex subunit beta	GCF_000970285.1	WP_048137534.1	A	TRUE	C	COG1614@1|root,arCOG04360@2157|Archaea,2XU0D@28890|Euryarchaeota,2N95I@224756|Methanomicrobia	Part of a complex that catalyzes the reversible cleavage of acetyl-CoA, allowing growth on acetate as sole source of carbon and energy. The alpha-epsilon complex generates CO from CO(2), while the beta subunit (this protein) combines the CO with CoA and a methyl group to form acetyl-CoA. The methyl group, which is incorporated into acetyl-CoA, is transferred to the beta subunit by a corrinoid iro…	One carbon pool	ko00680,ko01120,ko01200,map00680,map01120,map01200		NZ_CP009516.1	873234	874643
WP_048137532.1	CO dehydrogenase/acetyl-CoA synthase complex subunit epsilon	GCF_000970285.1	WP_048137534.1	A	TRUE	C	COG1880@1|root,arCOG04408@2157|Archaea,2XWPE@28890|Euryarchaeota,2NA4Z@224756|Methanomicrobia	Part of a complex that catalyzes the reversible cleavage of acetyl-CoA, allowing growth on acetate as sole source of carbon and energy. The alpha-epsilon subcomponent functions as a carbon monoxide dehydrogenase. The precise role of the epsilon subunit is unclear	One carbon pool	ko00680,ko01120,ko01200,map00680,map01120,map01200		NZ_CP009516.1	874668	875180
WP_048137532.1	CO dehydrogenase/acetyl-CoA synthase complex subunit epsilon	GCF_000970285.1	WP_048137534.1	A	TRUE	C	COG1880@1|root,arCOG04408@2157|Archaea,2XWPE@28890|Euryarchaeota,2NA4Z@224756|Methanomicrobia	Part of a complex that catalyzes the reversible cleavage of acetyl-CoA, allowing growth on acetate as sole source of carbon and energy. The alpha-epsilon subcomponent functions as a carbon monoxide dehydrogenase. The precise role of the epsilon subunit is unclear	One carbon pool	ko00680,ko01120,ko01200,map00680,map01120,map01200		NZ_CP009516.1	874668	875180
WP_048137534.1	CO dehydrogenase/acetyl-CoA synthase complex subunit alpha	GCF_000970285.1	WP_048137534.1	A	FALSE	unknown		unknown	CODH			NZ_CP009516.1	875183	877600
WP_048108940.1	acetyl-CoA decarbonylase/synthase complex subunit gamma	GCF_000970305.1	WP_048108945.1	A	TRUE	C	COG1456@1|root,arCOG01979@2157|Archaea,2XUSG@28890|Euryarchaeota,2N9BD@224756|Methanomicrobia	Part of a complex that catalyzes the reversible cleavage of acetyl-CoA, allowing	One carbon pool	ko00680,ko00720,ko01120,ko01200,map00680,map00720,map01120,map01200	2.1.1.245	NZ_CP009517.1	3587350	3588759
WP_048108940.1	acetyl-CoA decarbonylase/synthase complex subunit gamma	GCF_000970305.1	WP_048108945.1	A	TRUE	C	COG1456@1|root,arCOG01979@2157|Archaea,2XUSG@28890|Euryarchaeota,2N9BD@224756|Methanomicrobia	Part of a complex that catalyzes the reversible cleavage of acetyl-CoA, allowing	One carbon pool	ko00680,ko00720,ko01120,ko01200,map00680,map00720,map01120,map01200	2.1.1.245	NZ_CP009517.1	3587350	3588759
WP_048108941.1	CO dehydrogenase/acetyl-CoA synthase subunit delta	GCF_000970305.1	WP_048108945.1	A	TRUE	C	COG2069@1|root,arCOG01980@2157|Archaea,2XTXS@28890|Euryarchaeota,2N93F@224756|Methanomicrobia	Part of a complex that catalyzes the reversible cleavage of acetyl-CoA, allowing	One carbon pool	ko00680,ko00720,ko01120,ko01200,map00680,map00720,map01120,map01200	2.1.1.245	NZ_CP009517.1	3588763	3590091
WP_048108941.1	CO dehydrogenase/acetyl-CoA synthase subunit delta	GCF_000970305.1	WP_048108945.1	A	TRUE	C	COG2069@1|root,arCOG01980@2157|Archaea,2XTXS@28890|Euryarchaeota,2N93F@224756|Methanomicrobia	Part of a complex that catalyzes the reversible cleavage of acetyl-CoA, allowing	One carbon pool	ko00680,ko00720,ko01120,ko01200,map00680,map00720,map01120,map01200	2.1.1.245	NZ_CP009517.1	3588763	3590091
WP_048108942.1	AAA family ATPase	GCF_000970305.1	WP_048108945.1	A	TRUE	D	COG3640@1|root,arCOG00587@2157|Archaea,2XT61@28890|Euryarchaeota,2N9QI@224756|Methanomicrobia	AAA domain	CooC			NZ_CP009517.1	3590319	3591080
WP_048108943.1	CO dehydrogenase/CO-methylating acetyl-CoA synthase complex subunit beta	GCF_000970305.1	WP_048108945.1	A	TRUE	C	COG1614@1|root,arCOG04360@2157|Archaea,2XU0D@28890|Euryarchaeota,2N95I@224756|Methanomicrobia	Part of a complex that catalyzes the reversible cleavage of acetyl-CoA, allowing growth on acetate as sole source of carbon and energy. The alpha-epsilon complex generates CO from CO(2), while the beta subunit (this protein) combines the CO with CoA and a methyl group to form acetyl-CoA. The methyl group, which is incorporated into acetyl-CoA, is transferred to the beta subunit by a corrinoid iro…	One carbon pool	ko00680,ko01120,ko01200,map00680,map01120,map01200		NZ_CP009517.1	3591141	3592559
WP_048108943.1	CO dehydrogenase/CO-methylating acetyl-CoA synthase complex subunit beta	GCF_000970305.1	WP_048108945.1	A	TRUE	C	COG1614@1|root,arCOG04360@2157|Archaea,2XU0D@28890|Euryarchaeota,2N95I@224756|Methanomicrobia	Part of a complex that catalyzes the reversible cleavage of acetyl-CoA, allowing growth on acetate as sole source of carbon and energy. The alpha-epsilon complex generates CO from CO(2), while the beta subunit (this protein) combines the CO with CoA and a methyl group to form acetyl-CoA. The methyl group, which is incorporated into acetyl-CoA, is transferred to the beta subunit by a corrinoid iro…	One carbon pool	ko00680,ko01120,ko01200,map00680,map01120,map01200		NZ_CP009517.1	3591141	3592559
WP_048108944.1	CO dehydrogenase/acetyl-CoA synthase complex subunit epsilon	GCF_000970305.1	WP_048108945.1	A	TRUE	C	COG1880@1|root,arCOG04408@2157|Archaea,2XWPE@28890|Euryarchaeota,2NA4Z@224756|Methanomicrobia	Part of a complex that catalyzes the reversible cleavage of acetyl-CoA, allowing growth on acetate as sole source of carbon and energy. The alpha-epsilon subcomponent functions as a carbon monoxide dehydrogenase. The precise role of the epsilon subunit is unclear	One carbon pool	ko00680,ko01120,ko01200,map00680,map01120,map01200		NZ_CP009517.1	3592584	3593096
WP_048108944.1	CO dehydrogenase/acetyl-CoA synthase complex subunit epsilon	GCF_000970305.1	WP_048108945.1	A	TRUE	C	COG1880@1|root,arCOG04408@2157|Archaea,2XWPE@28890|Euryarchaeota,2NA4Z@224756|Methanomicrobia	Part of a complex that catalyzes the reversible cleavage of acetyl-CoA, allowing growth on acetate as sole source of carbon and energy. The alpha-epsilon subcomponent functions as a carbon monoxide dehydrogenase. The precise role of the epsilon subunit is unclear	One carbon pool	ko00680,ko01120,ko01200,map00680,map01120,map01200		NZ_CP009517.1	3592584	3593096
WP_048108945.1	CO dehydrogenase/acetyl-CoA synthase complex subunit alpha	GCF_000970305.1	WP_048108945.1	A	FALSE	unknown		unknown	CODH			NZ_CP009517.1	3593099	3595525
WP_048038599.1	CO dehydrogenase/acetyl-CoA synthase complex subunit epsilon	GCF_000979735.1	WP_048038642.1	A	TRUE	C	COG1880@1|root,arCOG04408@2157|Archaea,2XWPE@28890|Euryarchaeota,2NA4Z@224756|Methanomicrobia	Part of a complex that catalyzes the reversible cleavage of acetyl-CoA, allowing growth on acetate as sole source of carbon and energy. The alpha-epsilon subcomponent functions as a carbon monoxide dehydrogenase. The precise role of the epsilon subunit is unclear	One carbon pool	ko00680,ko01120,ko01200,map00680,map01120,map01200		NZ_JJPQ01000007.1	92	604
WP_048038599.1	CO dehydrogenase/acetyl-CoA synthase complex subunit epsilon	GCF_000979735.1	WP_048038642.1	A	TRUE	C	COG1880@1|root,arCOG04408@2157|Archaea,2XWPE@28890|Euryarchaeota,2NA4Z@224756|Methanomicrobia	Part of a complex that catalyzes the reversible cleavage of acetyl-CoA, allowing growth on acetate as sole source of carbon and energy. The alpha-epsilon subcomponent functions as a carbon monoxide dehydrogenase. The precise role of the epsilon subunit is unclear	One carbon pool	ko00680,ko01120,ko01200,map00680,map01120,map01200		NZ_JJPQ01000007.1	92	604
WP_048038642.1	CO dehydrogenase/acetyl-CoA synthase complex subunit alpha	GCF_000979735.1	WP_048038642.1	A	FALSE	unknown		unknown	CODH			NZ_JJPQ01000007.1	607	3024
WP_048095231.1	(Fe-S)-binding protein	GCF_001006045.1	WP_048095234.1	A	TRUE	C	COG1145@1|root,arCOG00292@2157|Archaea,2XXJH@28890|Euryarchaeota,2468F@183980|Archaeoglobi	formylmethanofuran dehydrogenase, subunit G	FeS	ko00680,ko01100,ko01120,ko01200,map00680,map01100,map01120,map01200		NZ_CP011267.1	956696	957166
WP_048096777.1	formylmethanofuran dehydrogenase subunit B	GCF_001006045.1	WP_048095234.1	A	TRUE	C	COG1029@1|root,arCOG01498@2157|Archaea,2XTYT@28890|Euryarchaeota,246RM@183980|Archaeoglobi	Formylmethanofuran dehydrogenase, subunit B	unknown	ko00680,ko01100,ko01120,ko01200,map00680,map01100,map01120,map01200	1.2.7.12	NZ_CP011267.1	957169	958389
WP_048095233.1	hypothetical protein	GCF_001006045.1	WP_048095234.1	A	TRUE	C	COG1153@1|root,arCOG02674@2157|Archaea,2Y496@28890|Euryarchaeota,24786@183980|Archaeoglobi	Molydopterin dinucleotide binding domain	unknown			NZ_CP011267.1	958390	958788
WP_048095234.1	CO dehydrogenase/acetyl-CoA synthase complex subunit alpha	GCF_001006045.1	WP_048095234.1	A	FALSE	unknown		unknown	CODH			NZ_CP011267.1	958943	961354
WP_048095236.1	CO dehydrogenase/acetyl-CoA synthase complex subunit epsilon	GCF_001006045.1	WP_048095234.1	A	TRUE	C	COG1880@1|root,arCOG04408@2157|Archaea,2XWPE@28890|Euryarchaeota,245XY@183980|Archaeoglobi	Part of a complex that catalyzes the reversible cleavage of acetyl-CoA, allowing autotrophic growth from CO(2). The alpha- epsilon subcomponent functions as a carbon monoxide dehydrogenase. The precise role of the epsilon subunit is unclear	One carbon pool	ko00680,ko01120,ko01200,map00680,map01120,map01200		NZ_CP011267.1	961376	961921
WP_048095236.1	CO dehydrogenase/acetyl-CoA synthase complex subunit epsilon	GCF_001006045.1	WP_048095234.1	A	TRUE	C	COG1880@1|root,arCOG04408@2157|Archaea,2XWPE@28890|Euryarchaeota,245XY@183980|Archaeoglobi	Part of a complex that catalyzes the reversible cleavage of acetyl-CoA, allowing autotrophic growth from CO(2). The alpha- epsilon subcomponent functions as a carbon monoxide dehydrogenase. The precise role of the epsilon subunit is unclear	One carbon pool	ko00680,ko01120,ko01200,map00680,map01120,map01200		NZ_CP011267.1	961376	961921
WP_048096778.1	CO dehydrogenase/CO-methylating acetyl-CoA synthase complex subunit beta	GCF_001006045.1	WP_048095234.1	A	TRUE	C	COG1614@1|root,arCOG04360@2157|Archaea,2XU0D@28890|Euryarchaeota,2462N@183980|Archaeoglobi	Part of a complex that catalyzes the reversible cleavage of acetyl-CoA, allowing autotrophic growth from CO(2). The alpha- epsilon complex generates CO from CO(2), while the beta subunit (this protein) combines the CO with CoA and a methyl group to form acetyl-CoA. The methyl group, which is incorporated into acetyl- CoA, is transferred to the beta subunit by a corrinoid iron-sulfur protein (the …	One carbon pool	ko00680,ko01120,ko01200,map00680,map01120,map01200		NZ_CP011267.1	961936	963519
WP_048096778.1	CO dehydrogenase/CO-methylating acetyl-CoA synthase complex subunit beta	GCF_001006045.1	WP_048095234.1	A	TRUE	C	COG1614@1|root,arCOG04360@2157|Archaea,2XU0D@28890|Euryarchaeota,2462N@183980|Archaeoglobi	Part of a complex that catalyzes the reversible cleavage of acetyl-CoA, allowing autotrophic growth from CO(2). The alpha- epsilon complex generates CO from CO(2), while the beta subunit (this protein) combines the CO with CoA and a methyl group to form acetyl-CoA. The methyl group, which is incorporated into acetyl- CoA, is transferred to the beta subunit by a corrinoid iron-sulfur protein (the …	One carbon pool	ko00680,ko01120,ko01200,map00680,map01120,map01200		NZ_CP011267.1	961936	963519
WP_048095237.1	AAA family ATPase	GCF_001006045.1	WP_048095234.1	A	TRUE	D	COG3640@1|root,arCOG00587@2157|Archaea,2XT61@28890|Euryarchaeota,245QG@183980|Archaeoglobi	AAA domain	CooC			NZ_CP011267.1	963623	964405
WP_048095239.1	CO dehydrogenase/acetyl-CoA synthase subunit delta	GCF_001006045.1	WP_048095234.1	A	TRUE	C	COG2069@1|root,arCOG01980@2157|Archaea,2XTXS@28890|Euryarchaeota,245TW@183980|Archaeoglobi	Part of a complex that catalyzes the reversible cleavage of acetyl-CoA, allowing autotrophic growth from CO(2). Probably maintains the overall quaternary structure of the ACDS complex	One carbon pool	ko00680,ko00720,ko01120,ko01200,map00680,map00720,map01120,map01200	2.1.1.245	NZ_CP011267.1	964423	965814
WP_048095239.1	CO dehydrogenase/acetyl-CoA synthase subunit delta	GCF_001006045.1	WP_048095234.1	A	TRUE	C	COG2069@1|root,arCOG01980@2157|Archaea,2XTXS@28890|Euryarchaeota,245TW@183980|Archaeoglobi	Part of a complex that catalyzes the reversible cleavage of acetyl-CoA, allowing autotrophic growth from CO(2). Probably maintains the overall quaternary structure of the ACDS complex	One carbon pool	ko00680,ko00720,ko01120,ko01200,map00680,map00720,map01120,map01200	2.1.1.245	NZ_CP011267.1	964423	965814
WP_048095241.1	acetyl-CoA decarbonylase/synthase complex subunit gamma	GCF_001006045.1	WP_048095234.1	A	TRUE	H	COG1456@1|root,arCOG01979@2157|Archaea,2XUSG@28890|Euryarchaeota,245ZW@183980|Archaeoglobi	Part of a complex that catalyzes the reversible cleavage of acetyl-CoA, allowing autotrophic growth from CO(2)	One carbon pool	ko00680,ko00720,ko01120,ko01200,map00680,map00720,map01120,map01200	2.1.1.245	NZ_CP011267.1	965819	967237
WP_048095241.1	acetyl-CoA decarbonylase/synthase complex subunit gamma	GCF_001006045.1	WP_048095234.1	A	TRUE	H	COG1456@1|root,arCOG01979@2157|Archaea,2XUSG@28890|Euryarchaeota,245ZW@183980|Archaeoglobi	Part of a complex that catalyzes the reversible cleavage of acetyl-CoA, allowing autotrophic growth from CO(2)	One carbon pool	ko00680,ko00720,ko01120,ko01200,map00680,map00720,map01120,map01200	2.1.1.245	NZ_CP011267.1	965819	967237
WP_048095242.1	threonine synthase	GCF_001006045.1	WP_048095234.1	A	TRUE	E	COG0498@1|root,arCOG01434@2157|Archaea,2XT84@28890|Euryarchaeota,245XI@183980|Archaeoglobi	Catalyzes the gamma-elimination of phosphate from L- phosphohomoserine and the beta-addition of water to produce L- threonine	unknown	ko00260,ko00750,ko01100,ko01110,ko01120,ko01230,map00260,map00750,map01100,map01110,map01120,map01230	4.2.3.1	NZ_CP011267.1	967268	968425
WP_048119840.1	CO dehydrogenase/acetyl-CoA synthase complex subunit alpha	GCF_001027005.1	WP_048119840.1	A	FALSE	unknown		unknown	CODH			NZ_CP008746.1	2540960	2543383
WP_048119842.1	CO dehydrogenase/acetyl-CoA synthase complex subunit epsilon	GCF_001027005.1	WP_048119840.1	A	TRUE	C	COG1880@1|root,arCOG04408@2157|Archaea,2XWPE@28890|Euryarchaeota,2NA4Z@224756|Methanomicrobia	Part of a complex that catalyzes the reversible cleavage of acetyl-CoA, allowing growth on acetate as sole source of carbon and energy. The alpha-epsilon subcomponent functions as a carbon monoxide dehydrogenase. The precise role of the epsilon subunit is unclear	One carbon pool	ko00680,ko01120,ko01200,map00680,map01120,map01200		NZ_CP008746.1	2543389	2543901
WP_048119842.1	CO dehydrogenase/acetyl-CoA synthase complex subunit epsilon	GCF_001027005.1	WP_048119840.1	A	TRUE	C	COG1880@1|root,arCOG04408@2157|Archaea,2XWPE@28890|Euryarchaeota,2NA4Z@224756|Methanomicrobia	Part of a complex that catalyzes the reversible cleavage of acetyl-CoA, allowing growth on acetate as sole source of carbon and energy. The alpha-epsilon subcomponent functions as a carbon monoxide dehydrogenase. The precise role of the epsilon subunit is unclear	One carbon pool	ko00680,ko01120,ko01200,map00680,map01120,map01200		NZ_CP008746.1	2543389	2543901
WP_048176780.1	CO dehydrogenase/CO-methylating acetyl-CoA synthase complex subunit beta	GCF_001027005.1	WP_048119840.1	A	TRUE	C	COG1614@1|root,arCOG04360@2157|Archaea,2XU0D@28890|Euryarchaeota,2N95I@224756|Methanomicrobia	Part of a complex that catalyzes the reversible cleavage of acetyl-CoA, allowing growth on acetate as sole source of carbon and energy. The alpha-epsilon complex generates CO from CO(2), while the beta subunit (this protein) combines the CO with CoA and a methyl group to form acetyl-CoA. The methyl group, which is incorporated into acetyl-CoA, is transferred to the beta subunit by a corrinoid iro…	One carbon pool	ko00680,ko01120,ko01200,map00680,map01120,map01200		NZ_CP008746.1	2543926	2545350
WP_048176780.1	CO dehydrogenase/CO-methylating acetyl-CoA synthase complex subunit beta	GCF_001027005.1	WP_048119840.1	A	TRUE	C	COG1614@1|root,arCOG04360@2157|Archaea,2XU0D@28890|Euryarchaeota,2N95I@224756|Methanomicrobia	Part of a complex that catalyzes the reversible cleavage of acetyl-CoA, allowing growth on acetate as sole source of carbon and energy. The alpha-epsilon complex generates CO from CO(2), while the beta subunit (this protein) combines the CO with CoA and a methyl group to form acetyl-CoA. The methyl group, which is incorporated into acetyl-CoA, is transferred to the beta subunit by a corrinoid iro…	One carbon pool	ko00680,ko01120,ko01200,map00680,map01120,map01200		NZ_CP008746.1	2543926	2545350
WP_048119844.1	AAA family ATPase	GCF_001027005.1	WP_048119840.1	A	TRUE	D	COG3640@1|root,arCOG00587@2157|Archaea,2XT61@28890|Euryarchaeota,2N9QI@224756|Methanomicrobia	AAA domain	CooC			NZ_CP008746.1	2545410	2546171
WP_048119846.1	CO dehydrogenase/acetyl-CoA synthase subunit delta	GCF_001027005.1	WP_048119840.1	A	TRUE	C	COG2069@1|root,arCOG01980@2157|Archaea,2XTXS@28890|Euryarchaeota,2N93F@224756|Methanomicrobia	Part of a complex that catalyzes the reversible cleavage of acetyl-CoA, allowing	One carbon pool	ko00680,ko00720,ko01120,ko01200,map00680,map00720,map01120,map01200	2.1.1.245	NZ_CP008746.1	2546411	2547736
WP_048119846.1	CO dehydrogenase/acetyl-CoA synthase subunit delta	GCF_001027005.1	WP_048119840.1	A	TRUE	C	COG2069@1|root,arCOG01980@2157|Archaea,2XTXS@28890|Euryarchaeota,2N93F@224756|Methanomicrobia	Part of a complex that catalyzes the reversible cleavage of acetyl-CoA, allowing	One carbon pool	ko00680,ko00720,ko01120,ko01200,map00680,map00720,map01120,map01200	2.1.1.245	NZ_CP008746.1	2546411	2547736
WP_048119848.1	acetyl-CoA decarbonylase/synthase complex subunit gamma	GCF_001027005.1	WP_048119840.1	A	TRUE	C	COG1456@1|root,arCOG01979@2157|Archaea,2XUSG@28890|Euryarchaeota,2N9BD@224756|Methanomicrobia	Part of a complex that catalyzes the reversible cleavage of acetyl-CoA, allowing	One carbon pool	ko00680,ko00720,ko01120,ko01200,map00680,map00720,map01120,map01200	2.1.1.245	NZ_CP008746.1	2547740	2549149
WP_048119848.1	acetyl-CoA decarbonylase/synthase complex subunit gamma	GCF_001027005.1	WP_048119840.1	A	TRUE	C	COG1456@1|root,arCOG01979@2157|Archaea,2XUSG@28890|Euryarchaeota,2N9BD@224756|Methanomicrobia	Part of a complex that catalyzes the reversible cleavage of acetyl-CoA, allowing	One carbon pool	ko00680,ko00720,ko01120,ko01200,map00680,map00720,map01120,map01200	2.1.1.245	NZ_CP008746.1	2547740	2549149
WP_054300089.1	CO dehydrogenase/acetyl-CoA synthase complex subunit alpha	GCF_001304615.2	WP_054300089.1	A	FALSE	unknown		unknown	CODH			NZ_CP032683.1	851615	854029
WP_054300090.1	CO dehydrogenase/acetyl-CoA synthase complex subunit epsilon	GCF_001304615.2	WP_054300089.1	A	TRUE	C	COG1880@1|root,arCOG04408@2157|Archaea,2XWPE@28890|Euryarchaeota,2NA4Z@224756|Methanomicrobia	Part of a complex that catalyzes the reversible cleavage of acetyl-CoA, allowing growth on acetate as sole source of carbon and energy. The alpha-epsilon subcomponent functions as a carbon monoxide dehydrogenase. The precise role of the epsilon subunit is unclear	One carbon pool	ko00680,ko01120,ko01200,map00680,map01120,map01200		NZ_CP032683.1	854032	854544
WP_054300090.1	CO dehydrogenase/acetyl-CoA synthase complex subunit epsilon	GCF_001304615.2	WP_054300089.1	A	TRUE	C	COG1880@1|root,arCOG04408@2157|Archaea,2XWPE@28890|Euryarchaeota,2NA4Z@224756|Methanomicrobia	Part of a complex that catalyzes the reversible cleavage of acetyl-CoA, allowing growth on acetate as sole source of carbon and energy. The alpha-epsilon subcomponent functions as a carbon monoxide dehydrogenase. The precise role of the epsilon subunit is unclear	One carbon pool	ko00680,ko01120,ko01200,map00680,map01120,map01200		NZ_CP032683.1	854032	854544
WP_054300091.1	CO dehydrogenase/CO-methylating acetyl-CoA synthase complex subunit beta	GCF_001304615.2	WP_054300089.1	A	TRUE	C	COG1614@1|root,arCOG04360@2157|Archaea,2XU0D@28890|Euryarchaeota,2N95I@224756|Methanomicrobia	Part of a complex that catalyzes the reversible cleavage of acetyl-CoA, allowing growth on acetate as sole source of carbon and energy. The alpha-epsilon complex generates CO from CO(2), while the beta subunit (this protein) combines the CO with CoA and a methyl group to form acetyl-CoA. The methyl group, which is incorporated into acetyl-CoA, is transferred to the beta subunit by a corrinoid iro…	One carbon pool	ko00680,ko01120,ko01200,map00680,map01120,map01200		NZ_CP032683.1	854568	855986
WP_054300091.1	CO dehydrogenase/CO-methylating acetyl-CoA synthase complex subunit beta	GCF_001304615.2	WP_054300089.1	A	TRUE	C	COG1614@1|root,arCOG04360@2157|Archaea,2XU0D@28890|Euryarchaeota,2N95I@224756|Methanomicrobia	Part of a complex that catalyzes the reversible cleavage of acetyl-CoA, allowing growth on acetate as sole source of carbon and energy. The alpha-epsilon complex generates CO from CO(2), while the beta subunit (this protein) combines the CO with CoA and a methyl group to form acetyl-CoA. The methyl group, which is incorporated into acetyl-CoA, is transferred to the beta subunit by a corrinoid iro…	One carbon pool	ko00680,ko01120,ko01200,map00680,map01120,map01200		NZ_CP032683.1	854568	855986
WP_054300092.1	AAA family ATPase	GCF_001304615.2	WP_054300089.1	A	TRUE	D	COG3640@1|root,arCOG00587@2157|Archaea,2XT61@28890|Euryarchaeota,2N9QI@224756|Methanomicrobia	AAA domain	CooC			NZ_CP032683.1	856043	856804
WP_054300093.1	CO dehydrogenase/acetyl-CoA synthase subunit delta	GCF_001304615.2	WP_054300089.1	A	TRUE	C	COG2069@1|root,arCOG01980@2157|Archaea,2XTXS@28890|Euryarchaeota,2N93F@224756|Methanomicrobia	Part of a complex that catalyzes the reversible cleavage of acetyl-CoA, allowing	One carbon pool	ko00680,ko00720,ko01120,ko01200,map00680,map00720,map01120,map01200	2.1.1.245	NZ_CP032683.1	857085	858398
WP_054300093.1	CO dehydrogenase/acetyl-CoA synthase subunit delta	GCF_001304615.2	WP_054300089.1	A	TRUE	C	COG2069@1|root,arCOG01980@2157|Archaea,2XTXS@28890|Euryarchaeota,2N93F@224756|Methanomicrobia	Part of a complex that catalyzes the reversible cleavage of acetyl-CoA, allowing	One carbon pool	ko00680,ko00720,ko01120,ko01200,map00680,map00720,map01120,map01200	2.1.1.245	NZ_CP032683.1	857085	858398
WP_054300094.1	acetyl-CoA decarbonylase/synthase complex subunit gamma	GCF_001304615.2	WP_054300089.1	A	TRUE	C	COG1456@1|root,arCOG01979@2157|Archaea,2XUSG@28890|Euryarchaeota,2N9BD@224756|Methanomicrobia	Part of a complex that catalyzes the reversible cleavage of acetyl-CoA, allowing	One carbon pool	ko00680,ko00720,ko01120,ko01200,map00680,map00720,map01120,map01200	2.1.1.245	NZ_CP032683.1	858402	859811
WP_054300094.1	acetyl-CoA decarbonylase/synthase complex subunit gamma	GCF_001304615.2	WP_054300089.1	A	TRUE	C	COG1456@1|root,arCOG01979@2157|Archaea,2XUSG@28890|Euryarchaeota,2N9BD@224756|Methanomicrobia	Part of a complex that catalyzes the reversible cleavage of acetyl-CoA, allowing	One carbon pool	ko00680,ko00720,ko01120,ko01200,map00680,map00720,map01120,map01200	2.1.1.245	NZ_CP032683.1	858402	859811
WP_066973746.1	CO dehydrogenase/acetyl-CoA synthase complex subunit alpha	GCF_001639265.1	WP_066973746.1	A	FALSE	unknown		unknown	CODH			NZ_LWMT01000275.1	3373	5736
WP_066973748.1	CO dehydrogenase/acetyl-CoA synthase complex subunit epsilon	GCF_001639265.1	WP_066973746.1	A	TRUE	C	COG1880@1|root,arCOG04408@2157|Archaea,2XWPE@28890|Euryarchaeota	Part of a complex that catalyzes the reversible cleavage of acetyl-CoA, allowing autotrophic growth from CO(2). The alpha- epsilon subcomponent functions as a carbon monoxide dehydrogenase. The precise role of the epsilon subunit is unclear	One carbon pool	ko00680,ko01120,ko01200,map00680,map01120,map01200		NZ_LWMT01000275.1	5738	6241
WP_066973748.1	CO dehydrogenase/acetyl-CoA synthase complex subunit epsilon	GCF_001639265.1	WP_066973746.1	A	TRUE	C	COG1880@1|root,arCOG04408@2157|Archaea,2XWPE@28890|Euryarchaeota	Part of a complex that catalyzes the reversible cleavage of acetyl-CoA, allowing autotrophic growth from CO(2). The alpha- epsilon subcomponent functions as a carbon monoxide dehydrogenase. The precise role of the epsilon subunit is unclear	One carbon pool	ko00680,ko01120,ko01200,map00680,map01120,map01200		NZ_LWMT01000275.1	5738	6241
WP_066973749.1	CO dehydrogenase/CO-methylating acetyl-CoA synthase complex subunit beta	GCF_001639265.1	WP_066973746.1	A	TRUE	C	COG1614@1|root,arCOG04360@2157|Archaea,2XU0D@28890|Euryarchaeota	Part of a complex that catalyzes the reversible cleavage of acetyl-CoA, allowing autotrophic growth from CO(2). The alpha- epsilon complex generates CO from CO(2), while the beta subunit (this protein) combines the CO with CoA and a methyl group to form acetyl-CoA. The methyl group, which is incorporated into acetyl- CoA, is transferred to the beta subunit by a corrinoid iron-sulfur protein (the …	One carbon pool	ko00680,ko01120,ko01200,map00680,map01120,map01200	1.2.7.4	NZ_LWMT01000275.1	6447	7838
WP_066973749.1	CO dehydrogenase/CO-methylating acetyl-CoA synthase complex subunit beta	GCF_001639265.1	WP_066973746.1	A	TRUE	C	COG1614@1|root,arCOG04360@2157|Archaea,2XU0D@28890|Euryarchaeota	Part of a complex that catalyzes the reversible cleavage of acetyl-CoA, allowing autotrophic growth from CO(2). The alpha- epsilon complex generates CO from CO(2), while the beta subunit (this protein) combines the CO with CoA and a methyl group to form acetyl-CoA. The methyl group, which is incorporated into acetyl- CoA, is transferred to the beta subunit by a corrinoid iron-sulfur protein (the …	One carbon pool	ko00680,ko01120,ko01200,map00680,map01120,map01200	1.2.7.4	NZ_LWMT01000275.1	6447	7838
WP_066973754.1	AAA family ATPase	GCF_001639265.1	WP_066973746.1	A	TRUE	D	COG3640@1|root,arCOG00587@2157|Archaea,2XT61@28890|Euryarchaeota	PFAM Cobyrinic acid a,c-diamide synthase	CooC			NZ_LWMT01000275.1	8085	8837
WP_066973756.1	CO dehydrogenase/acetyl-CoA synthase subunit delta	GCF_001639265.1	WP_066973746.1	A	TRUE	C	COG2069@1|root,arCOG01980@2157|Archaea,2XTXS@28890|Euryarchaeota	Part of a complex that catalyzes the reversible cleavage of acetyl-CoA, allowing autotrophic growth from CO(2). Probably maintains the overall quaternary structure of the ACDS complex	One carbon pool	ko00680,ko00720,ko01120,ko01200,map00680,map00720,map01120,map01200	2.1.1.245	NZ_LWMT01000275.1	9057	10211
WP_066973756.1	CO dehydrogenase/acetyl-CoA synthase subunit delta	GCF_001639265.1	WP_066973746.1	A	TRUE	C	COG2069@1|root,arCOG01980@2157|Archaea,2XTXS@28890|Euryarchaeota	Part of a complex that catalyzes the reversible cleavage of acetyl-CoA, allowing autotrophic growth from CO(2). Probably maintains the overall quaternary structure of the ACDS complex	One carbon pool	ko00680,ko00720,ko01120,ko01200,map00680,map00720,map01120,map01200	2.1.1.245	NZ_LWMT01000275.1	9057	10211
WP_066973758.1	acetyl-CoA decarbonylase/synthase complex subunit gamma	GCF_001639265.1	WP_066973746.1	A	TRUE	H	COG1456@1|root,arCOG01979@2157|Archaea,2XUSG@28890|Euryarchaeota	Part of a complex that catalyzes the reversible cleavage of acetyl-CoA, allowing autotrophic growth from CO(2)	One carbon pool	ko00680,ko00720,ko01120,ko01200,map00680,map00720,map01120,map01200	2.1.1.245	NZ_LWMT01000275.1	10231	11604
WP_066973758.1	acetyl-CoA decarbonylase/synthase complex subunit gamma	GCF_001639265.1	WP_066973746.1	A	TRUE	H	COG1456@1|root,arCOG01979@2157|Archaea,2XUSG@28890|Euryarchaeota	Part of a complex that catalyzes the reversible cleavage of acetyl-CoA, allowing autotrophic growth from CO(2)	One carbon pool	ko00680,ko00720,ko01120,ko01200,map00680,map00720,map01120,map01200	2.1.1.245	NZ_LWMT01000275.1	10231	11604
WP_066973760.1	4Fe-4S dicluster domain-containing protein	GCF_001639265.1	WP_066973746.1	A	TRUE	C	COG1142@1|root,arCOG01502@2157|Archaea,2XXN1@28890|Euryarchaeota	PFAM 4Fe-4S ferredoxin, iron-sulfur binding domain protein	FeS			NZ_LWMT01000275.1	11778	12245
WP_067260056.1	CO dehydrogenase/acetyl-CoA synthase complex subunit epsilon	GCF_001639285.1	WP_067260057.1	A	TRUE	C	COG1880@1|root,arCOG04408@2157|Archaea,2XWPE@28890|Euryarchaeota	Part of a complex that catalyzes the reversible cleavage of acetyl-CoA, allowing autotrophic growth from CO(2). The alpha- epsilon subcomponent functions as a carbon monoxide dehydrogenase. The precise role of the epsilon subunit is unclear	One carbon pool	ko00680,ko01120,ko01200,map00680,map01120,map01200		NZ_LWMW01000117.1	46694	47206
WP_067260056.1	CO dehydrogenase/acetyl-CoA synthase complex subunit epsilon	GCF_001639285.1	WP_067260057.1	A	TRUE	C	COG1880@1|root,arCOG04408@2157|Archaea,2XWPE@28890|Euryarchaeota	Part of a complex that catalyzes the reversible cleavage of acetyl-CoA, allowing autotrophic growth from CO(2). The alpha- epsilon subcomponent functions as a carbon monoxide dehydrogenase. The precise role of the epsilon subunit is unclear	One carbon pool	ko00680,ko01120,ko01200,map00680,map01120,map01200		NZ_LWMW01000117.1	46694	47206
WP_067260057.1	CO dehydrogenase/acetyl-CoA synthase complex subunit alpha	GCF_001639285.1	WP_067260057.1	A	FALSE	unknown		unknown	CODH			NZ_LWMW01000117.1	47259	49619
WP_072561797.1	aspartate-semialdehyde dehydrogenase	GCF_001889405.1	WP_072561804.1	A	TRUE	E	COG0136@1|root,COG0136@2|Bacteria,1MUHG@1224|Proteobacteria,2TSRD@28211|Alphaproteobacteria,2JQDF@204441|Rhodospirillales	Catalyzes the NADPH-dependent formation of L-aspartate- semialdehyde (L-ASA) by the reductive dephosphorylation of L- aspartyl-4-phosphate	unknown	ko00260,ko00261,ko00270,ko00300,ko01100,ko01110,ko01120,ko01130,ko01210,ko01230,map00260,map00261,map00270,map00300,map01100,map01110,map01120,map01130,map01210,map01230	1.2.1.11	NZ_CP017921.1	1499417	1500412
WP_072561798.1	DUF362 domain-containing protein	GCF_001889405.1	WP_072561804.1	A	TRUE	C	COG2768@1|root,arCOG02448@2157|Archaea,2XW30@28890|Euryarchaeota,2N9AE@224756|Methanomicrobia	PFAM 4Fe-4S ferredoxin, iron-sulfur binding domain protein	FeS			NZ_CP017921.1	1500629	1501738
WP_072561799.1	acetyl-CoA decarbonylase/synthase complex subunit gamma	GCF_001889405.1	WP_072561804.1	A	TRUE	C	COG1456@1|root,arCOG01979@2157|Archaea,2XUSG@28890|Euryarchaeota,2N9BD@224756|Methanomicrobia	Part of a complex that catalyzes the reversible cleavage of acetyl-CoA, allowing	One carbon pool	ko00680,ko00720,ko01120,ko01200,map00680,map00720,map01120,map01200	2.1.1.245	NZ_CP017921.1	1501822	1503234
WP_072561799.1	acetyl-CoA decarbonylase/synthase complex subunit gamma	GCF_001889405.1	WP_072561804.1	A	TRUE	C	COG1456@1|root,arCOG01979@2157|Archaea,2XUSG@28890|Euryarchaeota,2N9BD@224756|Methanomicrobia	Part of a complex that catalyzes the reversible cleavage of acetyl-CoA, allowing	One carbon pool	ko00680,ko00720,ko01120,ko01200,map00680,map00720,map01120,map01200	2.1.1.245	NZ_CP017921.1	1501822	1503234
WP_072561800.1	CO dehydrogenase/acetyl-CoA synthase subunit delta	GCF_001889405.1	WP_072561804.1	A	TRUE	C	COG2069@1|root,arCOG01980@2157|Archaea,2XTXS@28890|Euryarchaeota,2N93F@224756|Methanomicrobia	Part of a complex that catalyzes the reversible cleavage of acetyl-CoA, allowing	One carbon pool	ko00680,ko00720,ko01120,ko01200,map00680,map00720,map01120,map01200	2.1.1.245	NZ_CP017921.1	1503236	1504555
WP_072561800.1	CO dehydrogenase/acetyl-CoA synthase subunit delta	GCF_001889405.1	WP_072561804.1	A	TRUE	C	COG2069@1|root,arCOG01980@2157|Archaea,2XTXS@28890|Euryarchaeota,2N93F@224756|Methanomicrobia	Part of a complex that catalyzes the reversible cleavage of acetyl-CoA, allowing	One carbon pool	ko00680,ko00720,ko01120,ko01200,map00680,map00720,map01120,map01200	2.1.1.245	NZ_CP017921.1	1503236	1504555
WP_072561801.1	AAA family ATPase	GCF_001889405.1	WP_072561804.1	A	TRUE	D	COG3640@1|root,arCOG00587@2157|Archaea,2XT61@28890|Euryarchaeota,2N9QI@224756|Methanomicrobia	AAA domain	CooC			NZ_CP017921.1	1504578	1505333
WP_072561802.1	CO dehydrogenase/CO-methylating acetyl-CoA synthase complex subunit beta	GCF_001889405.1	WP_072561804.1	A	TRUE	C	COG1614@1|root,arCOG04360@2157|Archaea,2XU0D@28890|Euryarchaeota,2N95I@224756|Methanomicrobia	Part of a complex that catalyzes the reversible cleavage of acetyl-CoA, allowing growth on acetate as sole source of carbon and energy. The alpha-epsilon complex generates CO from CO(2), while the beta subunit (this protein) combines the CO with CoA and a methyl group to form acetyl-CoA. The methyl group, which is incorporated into acetyl-CoA, is transferred to the beta subunit by a corrinoid iro…	One carbon pool	ko00680,ko01120,ko01200,map00680,map01120,map01200		NZ_CP017921.1	1505349	1506746
WP_072561802.1	CO dehydrogenase/CO-methylating acetyl-CoA synthase complex subunit beta	GCF_001889405.1	WP_072561804.1	A	TRUE	C	COG1614@1|root,arCOG04360@2157|Archaea,2XU0D@28890|Euryarchaeota,2N95I@224756|Methanomicrobia	Part of a complex that catalyzes the reversible cleavage of acetyl-CoA, allowing growth on acetate as sole source of carbon and energy. The alpha-epsilon complex generates CO from CO(2), while the beta subunit (this protein) combines the CO with CoA and a methyl group to form acetyl-CoA. The methyl group, which is incorporated into acetyl-CoA, is transferred to the beta subunit by a corrinoid iro…	One carbon pool	ko00680,ko01120,ko01200,map00680,map01120,map01200		NZ_CP017921.1	1505349	1506746
WP_072561803.1	CO dehydrogenase/acetyl-CoA synthase complex subunit epsilon	GCF_001889405.1	WP_072561804.1	A	TRUE	C	COG1880@1|root,arCOG04408@2157|Archaea,2XWPE@28890|Euryarchaeota,2NA4Z@224756|Methanomicrobia	Part of a complex that catalyzes the reversible cleavage of acetyl-CoA, allowing growth on acetate as sole source of carbon and energy. The alpha-epsilon subcomponent functions as a carbon monoxide dehydrogenase. The precise role of the epsilon subunit is unclear	One carbon pool	ko00680,ko01120,ko01200,map00680,map01120,map01200		NZ_CP017921.1	1506772	1507284
WP_072561803.1	CO dehydrogenase/acetyl-CoA synthase complex subunit epsilon	GCF_001889405.1	WP_072561804.1	A	TRUE	C	COG1880@1|root,arCOG04408@2157|Archaea,2XWPE@28890|Euryarchaeota,2NA4Z@224756|Methanomicrobia	Part of a complex that catalyzes the reversible cleavage of acetyl-CoA, allowing growth on acetate as sole source of carbon and energy. The alpha-epsilon subcomponent functions as a carbon monoxide dehydrogenase. The precise role of the epsilon subunit is unclear	One carbon pool	ko00680,ko01120,ko01200,map00680,map01120,map01200		NZ_CP017921.1	1506772	1507284
WP_072561804.1	CO dehydrogenase/acetyl-CoA synthase complex subunit alpha	GCF_001889405.1	WP_072561804.1	A	FALSE	unknown		unknown	CODH			NZ_CP017921.1	1507287	1509692
WP_309492005.1	CO dehydrogenase/acetyl-CoA synthase complex subunit epsilon	GCF_002009985.1	WP_309492006.1	A	TRUE	C	COG1880@1|root,arCOG04408@2157|Archaea,2XWPE@28890|Euryarchaeota	Part of a complex that catalyzes the reversible cleavage of acetyl-CoA, allowing autotrophic growth from CO(2). The alpha- epsilon subcomponent functions as a carbon monoxide dehydrogenase. The precise role of the epsilon subunit is unclear	One carbon pool	ko00680,ko01120,ko01200,map00680,map01120,map01200		NZ_MTLX02000002.1	157367	157909
WP_309492005.1	CO dehydrogenase/acetyl-CoA synthase complex subunit epsilon	GCF_002009985.1	WP_309492006.1	A	TRUE	C	COG1880@1|root,arCOG04408@2157|Archaea,2XWPE@28890|Euryarchaeota	Part of a complex that catalyzes the reversible cleavage of acetyl-CoA, allowing autotrophic growth from CO(2). The alpha- epsilon subcomponent functions as a carbon monoxide dehydrogenase. The precise role of the epsilon subunit is unclear	One carbon pool	ko00680,ko01120,ko01200,map00680,map01120,map01200		NZ_MTLX02000002.1	157367	157909
WP_309492006.1	CO dehydrogenase/acetyl-CoA synthase complex subunit alpha	GCF_002009985.1	WP_309492006.1	A	FALSE	unknown		unknown	CODH			NZ_MTLX02000002.1	157912	160242
WP_309492007.1	DUF1858 domain-containing protein	GCF_002009985.1	WP_309492006.1	A	TRUE	S	arCOG02075@1|root,arCOG02075@2157|Archaea,2Y0B8@28890|Euryarchaeota,2442V@183968|Thermococci	Domain of unknown function (DUF1858)	FeS			NZ_MTLX02000002.1	160312	160527
WP_309492009.1	metalloregulator ArsR/SmtB family transcription factor	GCF_002009985.1	WP_309492006.1	A	TRUE	K	COG0640@1|root,COG0640@2|Bacteria,1V859@1239|Firmicutes,4HPKE@91061|Bacilli,279UA@186823|Alicyclobacillaceae	helix_turn_helix, Arsenical Resistance Operon Repressor	unknown			NZ_MTLX02000002.1	160546	160869
WP_309492010.1	molecular chaperone	GCF_002009985.1	WP_309492006.1	A	TRUE	S	COG3381@1|root,COG3381@2|Bacteria	protein complex oligomerization	unknown			NZ_MTLX02000002.1	160979	161674
WP_309492011.1	4Fe-4S dicluster domain-containing protein	GCF_002009985.1	WP_309492006.1	A	TRUE	C	COG1140@1|root,COG1140@2|Bacteria,2NQZJ@2323|unclassified Bacteria	4Fe-4S dicluster domain	FeS	ko00642,ko00910,ko00920,ko01100,ko01120,ko01220,ko02020,map00642,map00910,map00920,map01100,map01120,map01220,map02020	1.7.5.1	NZ_MTLX02000002.1	161637	162752
WP_309492014.1	molybdopterin-dependent oxidoreductase	GCF_002009985.1	WP_309492006.1	A	TRUE	C	COG0243@1|root,COG0243@2|Bacteria	molybdopterin cofactor binding	unknown	ko00642,ko00910,ko00920,ko01100,ko01120,ko01220,ko02020,map00642,map00910,map00920,map01100,map01120,map01220,map02020	1.17.99.2,1.7.5.1,1.8.2.4	NZ_MTLX02000002.1	162745	166209
WP_309492016.1	hypothetical protein	GCF_002009985.1	WP_309492006.1	A	TRUE	unknown		unknown	unknown			NZ_MTLX02000002.1	166206	166679
WP_309492017.1	cupredoxin domain-containing protein	GCF_002009985.1	WP_309492006.1	A	TRUE	C	COG4263@1|root,arCOG06217@2157|Archaea,2Y89B@28890|Euryarchaeota,247EB@183980|Archaeoglobi	Cupredoxin-like domain	unknown	ko00190,ko01100,map00190,map01100	1.9.3.1	NZ_MTLX02000002.1	166689	167090
WP_309492018.1	4Fe-4S binding protein	GCF_002009985.1	WP_309492006.1	A	TRUE	C	COG0348@1|root,arCOG02772@2157|Archaea,2Y7DD@28890|Euryarchaeota,246PC@183980|Archaeoglobi	PFAM 4Fe-4S ferredoxin, iron-sulfur binding domain protein	FeS			NZ_MTLX02000002.1	167098	168558
WP_309492019.1	cupredoxin domain-containing protein	GCF_002009985.1	WP_309492006.1	A	TRUE	C	COG0348@1|root,COG1622@1|root,COG0348@2|Bacteria,COG1622@2|Bacteria	oxidoreductase activity, acting on a heme group of donors, oxygen as acceptor	unknown	ko00190,ko01100,map00190,map01100	1.9.3.1	NZ_MTLX02000002.1	168561	169016
WP_309492837.1	carbohydrate kinase family protein	GCF_002009985.1	WP_309492839.1	A	TRUE	unknown		unknown	unknown			NZ_MTLX02000005.1	371206	372153
WP_309492838.1	CO dehydrogenase/acetyl-CoA synthase complex subunit epsilon	GCF_002009985.1	WP_309492839.1	A	TRUE	C	COG1880@1|root,arCOG04408@2157|Archaea,2XWPE@28890|Euryarchaeota,2NA4Z@224756|Methanomicrobia	Part of a complex that catalyzes the reversible cleavage of acetyl-CoA, allowing growth on acetate as sole source of carbon and energy. The alpha-epsilon subcomponent functions as a carbon monoxide dehydrogenase. The precise role of the epsilon subunit is unclear	One carbon pool	ko00680,ko01120,ko01200,map00680,map01120,map01200		NZ_MTLX02000005.1	372258	372803
WP_309492838.1	CO dehydrogenase/acetyl-CoA synthase complex subunit epsilon	GCF_002009985.1	WP_309492839.1	A	TRUE	C	COG1880@1|root,arCOG04408@2157|Archaea,2XWPE@28890|Euryarchaeota,2NA4Z@224756|Methanomicrobia	Part of a complex that catalyzes the reversible cleavage of acetyl-CoA, allowing growth on acetate as sole source of carbon and energy. The alpha-epsilon subcomponent functions as a carbon monoxide dehydrogenase. The precise role of the epsilon subunit is unclear	One carbon pool	ko00680,ko01120,ko01200,map00680,map01120,map01200		NZ_MTLX02000005.1	372258	372803
WP_309492839.1	CO dehydrogenase/acetyl-CoA synthase complex subunit alpha	GCF_002009985.1	WP_309492839.1	A	FALSE	unknown		unknown	CODH			NZ_MTLX02000005.1	372807	375170
WP_309492840.1	VIT1/CCC1 transporter family protein	GCF_002009985.1	WP_309492839.1	A	TRUE	S	COG1814@1|root,COG1814@2|Bacteria,1RBQN@1224|Proteobacteria,1S2ZU@1236|Gammaproteobacteria	membrane	unknown			NZ_MTLX02000005.1	375239	375880
WP_309492842.1	helix-turn-helix domain-containing protein	GCF_002009985.1	WP_309492839.1	A	TRUE	unknown		unknown	unknown			NZ_MTLX02000005.1	375982	376338
WP_309492843.1	class II SORL domain-containing protein	GCF_002009985.1	WP_309492839.1	A	TRUE	C	COG2033@1|root,arCOG02146@2157|Archaea,2XXQW@28890|Euryarchaeota,246JB@183980|Archaeoglobi	Desulfoferrodoxin	unknown		1.15.1.2	NZ_MTLX02000005.1	376537	376917
WP_094228340.1	hypothetical protein	GCF_002243045.1	WP_094228306.1	A	TRUE	unknown		unknown	unknown			NZ_MBKP01000027.1	32577	32921
WP_094228301.1	acetyl-CoA decarbonylase/synthase complex subunit gamma	GCF_002243045.1	WP_094228306.1	A	TRUE	C	COG1456@1|root,arCOG01979@2157|Archaea,2XUSG@28890|Euryarchaeota,2N9BD@224756|Methanomicrobia	Part of a complex that catalyzes the reversible cleavage of acetyl-CoA, allowing	One carbon pool	ko00680,ko00720,ko01120,ko01200,map00680,map00720,map01120,map01200	2.1.1.245	NZ_MBKP01000027.1	33086	34495
WP_094228301.1	acetyl-CoA decarbonylase/synthase complex subunit gamma	GCF_002243045.1	WP_094228306.1	A	TRUE	C	COG1456@1|root,arCOG01979@2157|Archaea,2XUSG@28890|Euryarchaeota,2N9BD@224756|Methanomicrobia	Part of a complex that catalyzes the reversible cleavage of acetyl-CoA, allowing	One carbon pool	ko00680,ko00720,ko01120,ko01200,map00680,map00720,map01120,map01200	2.1.1.245	NZ_MBKP01000027.1	33086	34495
WP_094228302.1	CO dehydrogenase/acetyl-CoA synthase subunit delta	GCF_002243045.1	WP_094228306.1	A	TRUE	C	COG2069@1|root,arCOG01980@2157|Archaea,2XTXS@28890|Euryarchaeota,2N93F@224756|Methanomicrobia	Part of a complex that catalyzes the reversible cleavage of acetyl-CoA, allowing	One carbon pool	ko00680,ko00720,ko01120,ko01200,map00680,map00720,map01120,map01200	2.1.1.245	NZ_MBKP01000027.1	34499	35824
WP_094228302.1	CO dehydrogenase/acetyl-CoA synthase subunit delta	GCF_002243045.1	WP_094228306.1	A	TRUE	C	COG2069@1|root,arCOG01980@2157|Archaea,2XTXS@28890|Euryarchaeota,2N93F@224756|Methanomicrobia	Part of a complex that catalyzes the reversible cleavage of acetyl-CoA, allowing	One carbon pool	ko00680,ko00720,ko01120,ko01200,map00680,map00720,map01120,map01200	2.1.1.245	NZ_MBKP01000027.1	34499	35824
WP_094228303.1	AAA family ATPase	GCF_002243045.1	WP_094228306.1	A	TRUE	D	COG3640@1|root,arCOG00587@2157|Archaea,2XT61@28890|Euryarchaeota,2N9QI@224756|Methanomicrobia	AAA domain	CooC			NZ_MBKP01000027.1	35852	36604
WP_094228304.1	CO dehydrogenase/CO-methylating acetyl-CoA synthase complex subunit beta	GCF_002243045.1	WP_094228306.1	A	TRUE	C	COG1614@1|root,arCOG04360@2157|Archaea,2XU0D@28890|Euryarchaeota,2N95I@224756|Methanomicrobia	Part of a complex that catalyzes the reversible cleavage of acetyl-CoA, allowing growth on acetate as sole source of carbon and energy. The alpha-epsilon complex generates CO from CO(2), while the beta subunit (this protein) combines the CO with CoA and a methyl group to form acetyl-CoA. The methyl group, which is incorporated into acetyl-CoA, is transferred to the beta subunit by a corrinoid iro…	One carbon pool	ko00680,ko01120,ko01200,map00680,map01120,map01200		NZ_MBKP01000027.1	36617	38029
WP_094228304.1	CO dehydrogenase/CO-methylating acetyl-CoA synthase complex subunit beta	GCF_002243045.1	WP_094228306.1	A	TRUE	C	COG1614@1|root,arCOG04360@2157|Archaea,2XU0D@28890|Euryarchaeota,2N95I@224756|Methanomicrobia	Part of a complex that catalyzes the reversible cleavage of acetyl-CoA, allowing growth on acetate as sole source of carbon and energy. The alpha-epsilon complex generates CO from CO(2), while the beta subunit (this protein) combines the CO with CoA and a methyl group to form acetyl-CoA. The methyl group, which is incorporated into acetyl-CoA, is transferred to the beta subunit by a corrinoid iro…	One carbon pool	ko00680,ko01120,ko01200,map00680,map01120,map01200		NZ_MBKP01000027.1	36617	38029
WP_094228305.1	CO dehydrogenase/acetyl-CoA synthase complex subunit epsilon	GCF_002243045.1	WP_094228306.1	A	TRUE	C	COG1880@1|root,arCOG04408@2157|Archaea,2XWPE@28890|Euryarchaeota,2NA4Z@224756|Methanomicrobia	Part of a complex that catalyzes the reversible cleavage of acetyl-CoA, allowing growth on acetate as sole source of carbon and energy. The alpha-epsilon subcomponent functions as a carbon monoxide dehydrogenase. The precise role of the epsilon subunit is unclear	One carbon pool	ko00680,ko01120,ko01200,map00680,map01120,map01200		NZ_MBKP01000027.1	38060	38575
WP_094228305.1	CO dehydrogenase/acetyl-CoA synthase complex subunit epsilon	GCF_002243045.1	WP_094228306.1	A	TRUE	C	COG1880@1|root,arCOG04408@2157|Archaea,2XWPE@28890|Euryarchaeota,2NA4Z@224756|Methanomicrobia	Part of a complex that catalyzes the reversible cleavage of acetyl-CoA, allowing growth on acetate as sole source of carbon and energy. The alpha-epsilon subcomponent functions as a carbon monoxide dehydrogenase. The precise role of the epsilon subunit is unclear	One carbon pool	ko00680,ko01120,ko01200,map00680,map01120,map01200		NZ_MBKP01000027.1	38060	38575
WP_094228306.1	CO dehydrogenase/acetyl-CoA synthase complex subunit alpha	GCF_002243045.1	WP_094228306.1	A	FALSE	unknown		unknown	CODH			NZ_MBKP01000027.1	38576	40987
WP_072359736.1	aspartate-semialdehyde dehydrogenase	GCF_002761295.1	WP_072359723.1	A	TRUE	E	COG0136@1|root,COG0136@2|Bacteria,1MUHG@1224|Proteobacteria,2TSRD@28211|Alphaproteobacteria,2JQDF@204441|Rhodospirillales	Catalyzes the NADPH-dependent formation of L-aspartate- semialdehyde (L-ASA) by the reductive dephosphorylation of L- aspartyl-4-phosphate	unknown	ko00260,ko00261,ko00270,ko00300,ko01100,ko01110,ko01120,ko01130,ko01210,ko01230,map00260,map00261,map00270,map00300,map01100,map01110,map01120,map01130,map01210,map01230	1.2.1.11	NZ_CP017881.1	728484	729476
WP_072359734.1	DUF362 domain-containing protein	GCF_002761295.1	WP_072359723.1	A	TRUE	C	COG2768@1|root,arCOG02448@2157|Archaea,2XW30@28890|Euryarchaeota,2N9AE@224756|Methanomicrobia	PFAM 4Fe-4S ferredoxin, iron-sulfur binding domain protein	FeS			NZ_CP017881.1	729679	730788
WP_072359732.1	acetyl-CoA decarbonylase/synthase complex subunit gamma	GCF_002761295.1	WP_072359723.1	A	TRUE	C	COG1456@1|root,arCOG01979@2157|Archaea,2XUSG@28890|Euryarchaeota,2N9BD@224756|Methanomicrobia	Part of a complex that catalyzes the reversible cleavage of acetyl-CoA, allowing	One carbon pool	ko00680,ko00720,ko01120,ko01200,map00680,map00720,map01120,map01200	2.1.1.245	NZ_CP017881.1	730872	732284
WP_072359732.1	acetyl-CoA decarbonylase/synthase complex subunit gamma	GCF_002761295.1	WP_072359723.1	A	TRUE	C	COG1456@1|root,arCOG01979@2157|Archaea,2XUSG@28890|Euryarchaeota,2N9BD@224756|Methanomicrobia	Part of a complex that catalyzes the reversible cleavage of acetyl-CoA, allowing	One carbon pool	ko00680,ko00720,ko01120,ko01200,map00680,map00720,map01120,map01200	2.1.1.245	NZ_CP017881.1	730872	732284
WP_072359730.1	CO dehydrogenase/acetyl-CoA synthase subunit delta	GCF_002761295.1	WP_072359723.1	A	TRUE	C	COG2069@1|root,arCOG01980@2157|Archaea,2XTXS@28890|Euryarchaeota,2N93F@224756|Methanomicrobia	Part of a complex that catalyzes the reversible cleavage of acetyl-CoA, allowing	One carbon pool	ko00680,ko00720,ko01120,ko01200,map00680,map00720,map01120,map01200	2.1.1.245	NZ_CP017881.1	732286	733605
WP_072359730.1	CO dehydrogenase/acetyl-CoA synthase subunit delta	GCF_002761295.1	WP_072359723.1	A	TRUE	C	COG2069@1|root,arCOG01980@2157|Archaea,2XTXS@28890|Euryarchaeota,2N93F@224756|Methanomicrobia	Part of a complex that catalyzes the reversible cleavage of acetyl-CoA, allowing	One carbon pool	ko00680,ko00720,ko01120,ko01200,map00680,map00720,map01120,map01200	2.1.1.245	NZ_CP017881.1	732286	733605
WP_072359728.1	AAA family ATPase	GCF_002761295.1	WP_072359723.1	A	TRUE	D	COG3640@1|root,arCOG00587@2157|Archaea,2XT61@28890|Euryarchaeota,2N9QI@224756|Methanomicrobia	AAA domain	CooC			NZ_CP017881.1	733631	734383
WP_072359726.1	CO dehydrogenase/CO-methylating acetyl-CoA synthase complex subunit beta	GCF_002761295.1	WP_072359723.1	A	TRUE	C	COG1614@1|root,arCOG04360@2157|Archaea,2XU0D@28890|Euryarchaeota,2N95I@224756|Methanomicrobia	Part of a complex that catalyzes the reversible cleavage of acetyl-CoA, allowing growth on acetate as sole source of carbon and energy. The alpha-epsilon complex generates CO from CO(2), while the beta subunit (this protein) combines the CO with CoA and a methyl group to form acetyl-CoA. The methyl group, which is incorporated into acetyl-CoA, is transferred to the beta subunit by a corrinoid iro…	One carbon pool	ko00680,ko01120,ko01200,map00680,map01120,map01200		NZ_CP017881.1	734399	735796
WP_072359726.1	CO dehydrogenase/CO-methylating acetyl-CoA synthase complex subunit beta	GCF_002761295.1	WP_072359723.1	A	TRUE	C	COG1614@1|root,arCOG04360@2157|Archaea,2XU0D@28890|Euryarchaeota,2N95I@224756|Methanomicrobia	Part of a complex that catalyzes the reversible cleavage of acetyl-CoA, allowing growth on acetate as sole source of carbon and energy. The alpha-epsilon complex generates CO from CO(2), while the beta subunit (this protein) combines the CO with CoA and a methyl group to form acetyl-CoA. The methyl group, which is incorporated into acetyl-CoA, is transferred to the beta subunit by a corrinoid iro…	One carbon pool	ko00680,ko01120,ko01200,map00680,map01120,map01200		NZ_CP017881.1	734399	735796
WP_072359724.1	CO dehydrogenase/acetyl-CoA synthase complex subunit epsilon	GCF_002761295.1	WP_072359723.1	A	TRUE	C	COG1880@1|root,arCOG04408@2157|Archaea,2XWPE@28890|Euryarchaeota,2NA4Z@224756|Methanomicrobia	Part of a complex that catalyzes the reversible cleavage of acetyl-CoA, allowing growth on acetate as sole source of carbon and energy. The alpha-epsilon subcomponent functions as a carbon monoxide dehydrogenase. The precise role of the epsilon subunit is unclear	One carbon pool	ko00680,ko01120,ko01200,map00680,map01120,map01200		NZ_CP017881.1	735822	736334
WP_072359724.1	CO dehydrogenase/acetyl-CoA synthase complex subunit epsilon	GCF_002761295.1	WP_072359723.1	A	TRUE	C	COG1880@1|root,arCOG04408@2157|Archaea,2XWPE@28890|Euryarchaeota,2NA4Z@224756|Methanomicrobia	Part of a complex that catalyzes the reversible cleavage of acetyl-CoA, allowing growth on acetate as sole source of carbon and energy. The alpha-epsilon subcomponent functions as a carbon monoxide dehydrogenase. The precise role of the epsilon subunit is unclear	One carbon pool	ko00680,ko01120,ko01200,map00680,map01120,map01200		NZ_CP017881.1	735822	736334
WP_072359723.1	CO dehydrogenase/acetyl-CoA synthase complex subunit alpha	GCF_002761295.1	WP_072359723.1	A	FALSE	unknown		unknown	CODH			NZ_CP017881.1	736337	738742
WP_105460145.1	aspartate-semialdehyde dehydrogenase	GCF_002973515.1	WP_105460152.1	A	TRUE	E	COG0136@1|root,COG0136@2|Bacteria,1MUHG@1224|Proteobacteria,2TSRD@28211|Alphaproteobacteria,2JQDF@204441|Rhodospirillales	Catalyzes the NADPH-dependent formation of L-aspartate- semialdehyde (L-ASA) by the reductive dephosphorylation of L- aspartyl-4-phosphate	unknown	ko00260,ko00261,ko00270,ko00300,ko01100,ko01110,ko01120,ko01130,ko01210,ko01230,map00260,map00261,map00270,map00300,map01100,map01110,map01120,map01130,map01210,map01230	1.2.1.11	NZ_PVBU01000002.1	146687	147679
WP_096711242.1	DUF362 domain-containing protein	GCF_002973515.1	WP_105460152.1	A	TRUE	C	COG2768@1|root,arCOG02448@2157|Archaea,2XW30@28890|Euryarchaeota,2N9AE@224756|Methanomicrobia	PFAM 4Fe-4S ferredoxin, iron-sulfur binding domain protein	FeS			NZ_PVBU01000002.1	147888	148997
WP_258082544.1	transposase	GCF_002973515.1	WP_105460152.1	A	TRUE	L	COG0675@1|root,arCOG00684@2157|Archaea,2Y38N@28890|Euryarchaeota,2NAM7@224756|Methanomicrobia	Probable transposase	unknown			NZ_PVBU01000002.1	149121	149579
WP_105460147.1	acetyl-CoA decarbonylase/synthase complex subunit gamma	GCF_002973515.1	WP_105460152.1	A	TRUE	C	COG1456@1|root,arCOG01979@2157|Archaea,2XUSG@28890|Euryarchaeota,2N9BD@224756|Methanomicrobia	Part of a complex that catalyzes the reversible cleavage of acetyl-CoA, allowing	One carbon pool	ko00680,ko00720,ko01120,ko01200,map00680,map00720,map01120,map01200	2.1.1.245	NZ_PVBU01000002.1	149732	151144
WP_105460147.1	acetyl-CoA decarbonylase/synthase complex subunit gamma	GCF_002973515.1	WP_105460152.1	A	TRUE	C	COG1456@1|root,arCOG01979@2157|Archaea,2XUSG@28890|Euryarchaeota,2N9BD@224756|Methanomicrobia	Part of a complex that catalyzes the reversible cleavage of acetyl-CoA, allowing	One carbon pool	ko00680,ko00720,ko01120,ko01200,map00680,map00720,map01120,map01200	2.1.1.245	NZ_PVBU01000002.1	149732	151144
WP_105460148.1	CO dehydrogenase/acetyl-CoA synthase subunit delta	GCF_002973515.1	WP_105460152.1	A	TRUE	C	COG2069@1|root,arCOG01980@2157|Archaea,2XTXS@28890|Euryarchaeota,2N93F@224756|Methanomicrobia	Part of a complex that catalyzes the reversible cleavage of acetyl-CoA, allowing	One carbon pool	ko00680,ko00720,ko01120,ko01200,map00680,map00720,map01120,map01200	2.1.1.245	NZ_PVBU01000002.1	151146	152465
WP_105460148.1	CO dehydrogenase/acetyl-CoA synthase subunit delta	GCF_002973515.1	WP_105460152.1	A	TRUE	C	COG2069@1|root,arCOG01980@2157|Archaea,2XTXS@28890|Euryarchaeota,2N93F@224756|Methanomicrobia	Part of a complex that catalyzes the reversible cleavage of acetyl-CoA, allowing	One carbon pool	ko00680,ko00720,ko01120,ko01200,map00680,map00720,map01120,map01200	2.1.1.245	NZ_PVBU01000002.1	151146	152465
WP_105460149.1	AAA family ATPase	GCF_002973515.1	WP_105460152.1	A	TRUE	D	COG3640@1|root,arCOG00587@2157|Archaea,2XT61@28890|Euryarchaeota,2N9QI@224756|Methanomicrobia	AAA domain	CooC			NZ_PVBU01000002.1	152491	153243
WP_105460150.1	CO dehydrogenase/CO-methylating acetyl-CoA synthase complex subunit beta	GCF_002973515.1	WP_105460152.1	A	TRUE	C	COG1614@1|root,arCOG04360@2157|Archaea,2XU0D@28890|Euryarchaeota,2N95I@224756|Methanomicrobia	Part of a complex that catalyzes the reversible cleavage of acetyl-CoA, allowing growth on acetate as sole source of carbon and energy. The alpha-epsilon complex generates CO from CO(2), while the beta subunit (this protein) combines the CO with CoA and a methyl group to form acetyl-CoA. The methyl group, which is incorporated into acetyl-CoA, is transferred to the beta subunit by a corrinoid iro…	One carbon pool	ko00680,ko01120,ko01200,map00680,map01120,map01200		NZ_PVBU01000002.1	153259	154656
WP_105460150.1	CO dehydrogenase/CO-methylating acetyl-CoA synthase complex subunit beta	GCF_002973515.1	WP_105460152.1	A	TRUE	C	COG1614@1|root,arCOG04360@2157|Archaea,2XU0D@28890|Euryarchaeota,2N95I@224756|Methanomicrobia	Part of a complex that catalyzes the reversible cleavage of acetyl-CoA, allowing growth on acetate as sole source of carbon and energy. The alpha-epsilon complex generates CO from CO(2), while the beta subunit (this protein) combines the CO with CoA and a methyl group to form acetyl-CoA. The methyl group, which is incorporated into acetyl-CoA, is transferred to the beta subunit by a corrinoid iro…	One carbon pool	ko00680,ko01120,ko01200,map00680,map01120,map01200		NZ_PVBU01000002.1	153259	154656
WP_105460151.1	CO dehydrogenase/acetyl-CoA synthase complex subunit epsilon	GCF_002973515.1	WP_105460152.1	A	TRUE	C	COG1880@1|root,arCOG04408@2157|Archaea,2XWPE@28890|Euryarchaeota,2NA4Z@224756|Methanomicrobia	Part of a complex that catalyzes the reversible cleavage of acetyl-CoA, allowing growth on acetate as sole source of carbon and energy. The alpha-epsilon subcomponent functions as a carbon monoxide dehydrogenase. The precise role of the epsilon subunit is unclear	One carbon pool	ko00680,ko01120,ko01200,map00680,map01120,map01200		NZ_PVBU01000002.1	154682	155194
WP_105460151.1	CO dehydrogenase/acetyl-CoA synthase complex subunit epsilon	GCF_002973515.1	WP_105460152.1	A	TRUE	C	COG1880@1|root,arCOG04408@2157|Archaea,2XWPE@28890|Euryarchaeota,2NA4Z@224756|Methanomicrobia	Part of a complex that catalyzes the reversible cleavage of acetyl-CoA, allowing growth on acetate as sole source of carbon and energy. The alpha-epsilon subcomponent functions as a carbon monoxide dehydrogenase. The precise role of the epsilon subunit is unclear	One carbon pool	ko00680,ko01120,ko01200,map00680,map01120,map01200		NZ_PVBU01000002.1	154682	155194
WP_105460152.1	CO dehydrogenase/acetyl-CoA synthase complex subunit alpha	GCF_002973515.1	WP_105460152.1	A	FALSE	unknown		unknown	CODH			NZ_PVBU01000002.1	155197	157602
WP_012301265.1	bifunctional methylenetetrahydrofolate dehydrogenase/methenyltetrahydrofolate cyclohydrolase FolD	GCF_003932015.1	WP_012301267.1	A	TRUE	F	COG0190@1|root,COG0190@2|Bacteria,1TP1P@1239|Firmicutes,248DB@186801|Clostridia,2606K@186807|Peptococcaceae	Catalyzes the oxidation of 5,10- methylenetetrahydrofolate to 5,10-methenyltetrahydrofolate and then the hydrolysis of 5,10-methenyltetrahydrofolate to 10- formyltetrahydrofolate	One carbon pool	ko00670,ko00720,ko01100,ko01120,ko01200,map00670,map00720,map01100,map01120,map01200	1.5.1.5,3.5.4.9	NZ_CP034260.1	109099	109983
WP_012301265.1	bifunctional methylenetetrahydrofolate dehydrogenase/methenyltetrahydrofolate cyclohydrolase FolD	GCF_003932015.1	WP_012301267.1	A	TRUE	F	COG0190@1|root,COG0190@2|Bacteria,1TP1P@1239|Firmicutes,248DB@186801|Clostridia,2606K@186807|Peptococcaceae	Catalyzes the oxidation of 5,10- methylenetetrahydrofolate to 5,10-methenyltetrahydrofolate and then the hydrolysis of 5,10-methenyltetrahydrofolate to 10- formyltetrahydrofolate	One carbon pool	ko00670,ko00720,ko01100,ko01120,ko01200,map00670,map00720,map01100,map01120,map01200	1.5.1.5,3.5.4.9	NZ_CP034260.1	109099	109983
WP_012301266.1	formate dehydrogenase subunit alpha	GCF_003932015.1	WP_012301267.1	A	TRUE	C	COG3383@1|root,COG3383@2|Bacteria,1TT6D@1239|Firmicutes,24YN9@186801|Clostridia,267CA@186807|Peptococcaceae	Belongs to the prokaryotic molybdopterin-containing oxidoreductase family	One carbon pool	ko00630,ko00680,ko00720,ko01100,ko01120,ko01200,map00630,map00680,map00720,map01100,map01120,map01200	1.17.1.10,1.17.1.11,1.17.1.9,1.17.99.7	NZ_CP034260.1	110075	112249
WP_012301266.1	formate dehydrogenase subunit alpha	GCF_003932015.1	WP_012301267.1	A	TRUE	C	COG3383@1|root,COG3383@2|Bacteria,1TT6D@1239|Firmicutes,24YN9@186801|Clostridia,267CA@186807|Peptococcaceae	Belongs to the prokaryotic molybdopterin-containing oxidoreductase family	One carbon pool	ko00630,ko00680,ko00720,ko01100,ko01120,ko01200,map00630,map00680,map00720,map01100,map01120,map01200	1.17.1.10,1.17.1.11,1.17.1.9,1.17.99.7	NZ_CP034260.1	110075	112249
WP_012301267.1	CO dehydrogenase/acetyl-CoA synthase complex subunit alpha	GCF_003932015.1	WP_012301267.1	A	FALSE	unknown		unknown	CODH			NZ_CP034260.1	112259	114559
WP_012301268.1	CO dehydrogenase/acetyl-CoA synthase complex subunit epsilon	GCF_003932015.1	WP_012301267.1	A	TRUE	C	COG1880@1|root,COG1880@2|Bacteria	PFAM CO dehydrogenase beta subunit acetyl-CoA synthase epsilon subunit	One carbon pool	ko00680,ko00785,ko01100,ko01120,ko01200,map00680,map00785,map01100,map01120,map01200	6.3.1.20	NZ_CP034260.1	114603	115157
WP_012301268.1	CO dehydrogenase/acetyl-CoA synthase complex subunit epsilon	GCF_003932015.1	WP_012301267.1	A	TRUE	C	COG1880@1|root,COG1880@2|Bacteria	PFAM CO dehydrogenase beta subunit acetyl-CoA synthase epsilon subunit	One carbon pool	ko00680,ko00785,ko01100,ko01120,ko01200,map00680,map00785,map01100,map01120,map01200	6.3.1.20	NZ_CP034260.1	114603	115157
WP_012301269.1	AAA family ATPase	GCF_003932015.1	WP_012301267.1	A	TRUE	D	COG3640@1|root,COG3640@2|Bacteria,1TPCY@1239|Firmicutes,247JM@186801|Clostridia,260A3@186807|Peptococcaceae	PFAM CobQ CobB MinD ParA nucleotide binding domain	CooC			NZ_CP034260.1	115202	115957
WP_012301270.1	NADH-quinone oxidoreductase subunit NuoE	GCF_003932015.1	WP_012301267.1	A	TRUE	C	COG1810@1|root,COG1905@1|root,COG1810@2|Bacteria,COG1905@2|Bacteria,1V737@1239|Firmicutes,24HFB@186801|Clostridia,261VF@186807|Peptococcaceae	PFAM Respiratory-chain NADH dehydrogenase 24 Kd subunit	NAD(P)/FAD-dependent oxidoreductase	ko00190,ko01100,map00190,map01100	1.6.5.3	NZ_CP034260.1	115990	117123
WP_012301271.1	NADH-quinone oxidoreductase subunit NuoF	GCF_003932015.1	WP_012301267.1	A	TRUE	C	COG1894@1|root,COG1894@2|Bacteria,1TQB0@1239|Firmicutes,2483E@186801|Clostridia,260R6@186807|Peptococcaceae	NADH dehydrogenase	NAD(P)/FAD-dependent oxidoreductase	ko00190,ko01100,map00190,map01100	1.6.5.3	NZ_CP034260.1	117164	119134
WP_049752519.1	molybdopterin-dependent oxidoreductase	GCF_003932015.1	WP_012301267.1	A	TRUE	C	COG3383@1|root,COG3383@2|Bacteria,1UI1F@1239|Firmicutes,25EAG@186801|Clostridia,2607X@186807|Peptococcaceae	Molybdopterin oxidoreductase Fe4S4 region	unknown	ko00190,ko01100,map00190,map01100	1.6.5.3	NZ_CP034260.1	119121	122111
WP_012301273.1	CO dehydrogenase/CO-methylating acetyl-CoA synthase complex subunit beta	GCF_003932015.1	WP_012301267.1	A	TRUE	C	COG1614@1|root,COG1614@2|Bacteria,1TSWZ@1239|Firmicutes,248Y2@186801|Clostridia,2618Z@186807|Peptococcaceae	PFAM CO dehydrogenase acetyl-CoA synthase complex beta subunit	One carbon pool	ko00680,ko00720,ko01120,ko01200,map00680,map00720,map01120,map01200	2.3.1.169	NZ_CP034260.1	122247	123446
WP_012301273.1	CO dehydrogenase/CO-methylating acetyl-CoA synthase complex subunit beta	GCF_003932015.1	WP_012301267.1	A	TRUE	C	COG1614@1|root,COG1614@2|Bacteria,1TSWZ@1239|Firmicutes,248Y2@186801|Clostridia,2618Z@186807|Peptococcaceae	PFAM CO dehydrogenase acetyl-CoA synthase complex beta subunit	One carbon pool	ko00680,ko00720,ko01120,ko01200,map00680,map00720,map01120,map01200	2.3.1.169	NZ_CP034260.1	122247	123446
WP_012301274.1	acetyl-CoA decarbonylase/synthase complex subunit gamma	GCF_003932015.1	WP_012301267.1	A	TRUE	C	COG1456@1|root,COG1456@2|Bacteria,1TPWJ@1239|Firmicutes,24CTU@186801|Clostridia,2607K@186807|Peptococcaceae	CO dehydrogenase acetyl-CoA synthase delta subunit	One carbon pool	ko00680,ko00720,ko01120,ko01200,map00680,map00720,map01120,map01200	2.1.1.245	NZ_CP034260.1	123498	124856
WP_012301274.1	acetyl-CoA decarbonylase/synthase complex subunit gamma	GCF_003932015.1	WP_012301267.1	A	TRUE	C	COG1456@1|root,COG1456@2|Bacteria,1TPWJ@1239|Firmicutes,24CTU@186801|Clostridia,2607K@186807|Peptococcaceae	CO dehydrogenase acetyl-CoA synthase delta subunit	One carbon pool	ko00680,ko00720,ko01120,ko01200,map00680,map00720,map01120,map01200	2.1.1.245	NZ_CP034260.1	123498	124856
WP_012301275.1	dihydropteroate synthase	GCF_003932015.1	WP_012301267.1	A	TRUE	E	COG1410@1|root,COG1410@2|Bacteria,1UXXG@1239|Firmicutes,24D45@186801|Clostridia,266X2@186807|Peptococcaceae	Pterin binding enzyme	One carbon pool	ko00720,ko01120,ko01200,map00720,map01120,map01200	2.1.1.258	NZ_CP034260.1	124891	125763
WP_012301275.1	dihydropteroate synthase	GCF_003932015.1	WP_012301267.1	A	TRUE	E	COG1410@1|root,COG1410@2|Bacteria,1UXXG@1239|Firmicutes,24D45@186801|Clostridia,266X2@186807|Peptococcaceae	Pterin binding enzyme	One carbon pool	ko00720,ko01120,ko01200,map00720,map01120,map01200	2.1.1.258	NZ_CP034260.1	124891	125763
WP_012301276.1	acetyl-CoA decarbonylase/synthase complex subunit delta	GCF_003932015.1	WP_012301267.1	A	TRUE	C	COG2069@1|root,COG2069@2|Bacteria,1TSSY@1239|Firmicutes,24BVJ@186801|Clostridia,260ED@186807|Peptococcaceae	CO dehydrogenase acetyl-CoA synthase delta subunit	One carbon pool	ko00680,ko00720,ko01120,ko01200,map00680,map00720,map01120,map01200	2.1.1.245	NZ_CP034260.1	125802	126698
WP_012301276.1	acetyl-CoA decarbonylase/synthase complex subunit delta	GCF_003932015.1	WP_012301267.1	A	TRUE	C	COG2069@1|root,COG2069@2|Bacteria,1TSSY@1239|Firmicutes,24BVJ@186801|Clostridia,260ED@186807|Peptococcaceae	CO dehydrogenase acetyl-CoA synthase delta subunit	One carbon pool	ko00680,ko00720,ko01120,ko01200,map00680,map00720,map01120,map01200	2.1.1.245	NZ_CP034260.1	125802	126698
WP_242647856.1	hydrogenase iron-sulfur subunit	GCF_003932015.1	WP_012301267.1	A	TRUE	C	COG1908@1|root,COG1908@2|Bacteria,1V638@1239|Firmicutes,24J0E@186801|Clostridia,261V3@186807|Peptococcaceae	PFAM methyl-viologen-reducing hydrogenase delta subunit	Hydrogenase			NZ_CP034260.1	126877	127539
WP_012301278.1	methylenetetrahydrofolate reductase C-terminal domain-containing protein	GCF_003932015.1	WP_012301267.1	A	TRUE	C	COG4656@1|root,COG4656@2|Bacteria,1TS9H@1239|Firmicutes,24DQ7@186801|Clostridia,260XZ@186807|Peptococcaceae	PFAM Methylene-tetrahydrofolate reductase C terminal	One carbon pool			NZ_CP034260.1	127536	128201
WP_012301278.1	methylenetetrahydrofolate reductase C-terminal domain-containing protein	GCF_003932015.1	WP_012301267.1	A	TRUE	C	COG4656@1|root,COG4656@2|Bacteria,1TS9H@1239|Firmicutes,24DQ7@186801|Clostridia,260XZ@186807|Peptococcaceae	PFAM Methylene-tetrahydrofolate reductase C terminal	One carbon pool			NZ_CP034260.1	127536	128201
WP_012301279.1	methylenetetrahydrofolate reductase	GCF_003932015.1	WP_012301267.1	A	TRUE	C	COG0685@1|root,COG0685@2|Bacteria,1UHX4@1239|Firmicutes,25E62@186801|Clostridia,25ZZU@186807|Peptococcaceae	PFAM Methylenetetrahydrofolate reductase	One carbon pool	ko00670,ko00720,ko01100,ko01120,ko01200,ko01523,map00670,map00720,map01100,map01120,map01200,map01523	1.5.1.20	NZ_CP034260.1	128198	129118
WP_012301279.1	methylenetetrahydrofolate reductase	GCF_003932015.1	WP_012301267.1	A	TRUE	C	COG0685@1|root,COG0685@2|Bacteria,1UHX4@1239|Firmicutes,25E62@186801|Clostridia,25ZZU@186807|Peptococcaceae	PFAM Methylenetetrahydrofolate reductase	One carbon pool	ko00670,ko00720,ko01100,ko01120,ko01200,ko01523,map00670,map00720,map01100,map01120,map01200,map01523	1.5.1.20	NZ_CP034260.1	128198	129118
WP_012301280.1	formate--tetrahydrofolate ligase	GCF_003932015.1	WP_012301267.1	A	TRUE	F	COG2759@1|root,COG2759@2|Bacteria,1TP6N@1239|Firmicutes,247P5@186801|Clostridia,2601Q@186807|Peptococcaceae	Belongs to the formate--tetrahydrofolate ligase family	One carbon pool	ko00670,ko00720,ko01100,ko01120,ko01200,map00670,map00720,map01100,map01120,map01200	6.3.4.3	NZ_CP034260.1	129148	130821
WP_012301280.1	formate--tetrahydrofolate ligase	GCF_003932015.1	WP_012301267.1	A	TRUE	F	COG2759@1|root,COG2759@2|Bacteria,1TP6N@1239|Firmicutes,247P5@186801|Clostridia,2601Q@186807|Peptococcaceae	Belongs to the formate--tetrahydrofolate ligase family	One carbon pool	ko00670,ko00720,ko01100,ko01120,ko01200,map00670,map00720,map01100,map01120,map01200	6.3.4.3	NZ_CP034260.1	129148	130821
WP_012301281.1	LytTR family DNA-binding domain-containing protein	GCF_003932015.1	WP_012301267.1	A	TRUE	K	COG3279@1|root,COG3279@2|Bacteria,1V14X@1239|Firmicutes,24BG9@186801|Clostridia,25ZYI@186807|Peptococcaceae	PFAM response regulator receiver	transcriptional regulator			NZ_CP034260.1	130868	131617
WP_129599312.1	aspartate-semialdehyde dehydrogenase	GCF_004137855.1	WP_129596265.1	A	TRUE	E	COG0136@1|root,COG0136@2|Bacteria,1MUHG@1224|Proteobacteria,2TSRD@28211|Alphaproteobacteria,2JQDF@204441|Rhodospirillales	Catalyzes the NADPH-dependent formation of L-aspartate- semialdehyde (L-ASA) by the reductive dephosphorylation of L- aspartyl-4-phosphate	unknown	ko00260,ko00261,ko00270,ko00300,ko01100,ko01110,ko01120,ko01130,ko01210,ko01230,map00260,map00261,map00270,map00300,map01100,map01110,map01120,map01130,map01210,map01230	1.2.1.11	NZ_QBKB01000002.1	12183	13175
WP_129596257.1	DUF362 domain-containing protein	GCF_004137855.1	WP_129596265.1	A	TRUE	C	COG2768@1|root,arCOG02448@2157|Archaea,2XW30@28890|Euryarchaeota,2N9AE@224756|Methanomicrobia	PFAM 4Fe-4S ferredoxin, iron-sulfur binding domain protein	FeS			NZ_QBKB01000002.1	13383	14492
WP_129596259.1	acetyl-CoA decarbonylase/synthase complex subunit gamma	GCF_004137855.1	WP_129596265.1	A	TRUE	C	COG1456@1|root,arCOG01979@2157|Archaea,2XUSG@28890|Euryarchaeota,2N9BD@224756|Methanomicrobia	Part of a complex that catalyzes the reversible cleavage of acetyl-CoA, allowing	One carbon pool	ko00680,ko00720,ko01120,ko01200,map00680,map00720,map01120,map01200	2.1.1.245	NZ_QBKB01000002.1	14576	15988
WP_129596259.1	acetyl-CoA decarbonylase/synthase complex subunit gamma	GCF_004137855.1	WP_129596265.1	A	TRUE	C	COG1456@1|root,arCOG01979@2157|Archaea,2XUSG@28890|Euryarchaeota,2N9BD@224756|Methanomicrobia	Part of a complex that catalyzes the reversible cleavage of acetyl-CoA, allowing	One carbon pool	ko00680,ko00720,ko01120,ko01200,map00680,map00720,map01120,map01200	2.1.1.245	NZ_QBKB01000002.1	14576	15988
WP_129596261.1	CO dehydrogenase/acetyl-CoA synthase subunit delta	GCF_004137855.1	WP_129596265.1	A	TRUE	C	COG2069@1|root,arCOG01980@2157|Archaea,2XTXS@28890|Euryarchaeota,2N93F@224756|Methanomicrobia	Part of a complex that catalyzes the reversible cleavage of acetyl-CoA, allowing	One carbon pool	ko00680,ko00720,ko01120,ko01200,map00680,map00720,map01120,map01200	2.1.1.245	NZ_QBKB01000002.1	15990	17309
WP_129596261.1	CO dehydrogenase/acetyl-CoA synthase subunit delta	GCF_004137855.1	WP_129596265.1	A	TRUE	C	COG2069@1|root,arCOG01980@2157|Archaea,2XTXS@28890|Euryarchaeota,2N93F@224756|Methanomicrobia	Part of a complex that catalyzes the reversible cleavage of acetyl-CoA, allowing	One carbon pool	ko00680,ko00720,ko01120,ko01200,map00680,map00720,map01120,map01200	2.1.1.245	NZ_QBKB01000002.1	15990	17309
WP_129596263.1	AAA family ATPase	GCF_004137855.1	WP_129596265.1	A	TRUE	D	COG3640@1|root,arCOG00587@2157|Archaea,2XT61@28890|Euryarchaeota,2N9QI@224756|Methanomicrobia	AAA domain	CooC			NZ_QBKB01000002.1	17335	18087
WP_394342241.1	hypothetical protein	GCF_004137855.1	WP_129596265.1	A	TRUE	C	COG1614@1|root,arCOG04360@2157|Archaea,2XU0D@28890|Euryarchaeota,2N95I@224756|Methanomicrobia	Part of a complex that catalyzes the reversible cleavage of acetyl-CoA, allowing growth on acetate as sole source of carbon and energy. The alpha-epsilon complex generates CO from CO(2), while the beta subunit (this protein) combines the CO with CoA and a methyl group to form acetyl-CoA. The methyl group, which is incorporated into acetyl-CoA, is transferred to the beta subunit by a corrinoid iro…	One carbon pool	ko00680,ko01120,ko01200,map00680,map01120,map01200		NZ_QBKB01000002.1	18103	18441
WP_394342241.1	hypothetical protein	GCF_004137855.1	WP_129596265.1	A	TRUE	C	COG1614@1|root,arCOG04360@2157|Archaea,2XU0D@28890|Euryarchaeota,2N95I@224756|Methanomicrobia	Part of a complex that catalyzes the reversible cleavage of acetyl-CoA, allowing growth on acetate as sole source of carbon and energy. The alpha-epsilon complex generates CO from CO(2), while the beta subunit (this protein) combines the CO with CoA and a methyl group to form acetyl-CoA. The methyl group, which is incorporated into acetyl-CoA, is transferred to the beta subunit by a corrinoid iro…	One carbon pool	ko00680,ko01120,ko01200,map00680,map01120,map01200		NZ_QBKB01000002.1	18103	18441
C9889_RS11365	CO dehydrogenase/CO-methylating acetyl-CoA synthase complex subunit beta	GCF_004137855.1	WP_129596265.1	A	TRUE	unknown		unknown	One carbon pool			NZ_QBKB01000002.1	18544	19838
C9889_RS11365	CO dehydrogenase/CO-methylating acetyl-CoA synthase complex subunit beta	GCF_004137855.1	WP_129596265.1	A	TRUE	unknown		unknown	One carbon pool			NZ_QBKB01000002.1	18544	19838
C9889_RS00100	CO dehydrogenase/acetyl-CoA synthase complex subunit epsilon	GCF_004137855.1	WP_129596265.1	A	TRUE	unknown		unknown	One carbon pool			NZ_QBKB01000002.1	19864	20375
C9889_RS00100	CO dehydrogenase/acetyl-CoA synthase complex subunit epsilon	GCF_004137855.1	WP_129596265.1	A	TRUE	unknown		unknown	One carbon pool			NZ_QBKB01000002.1	19864	20375
WP_129596265.1	CO dehydrogenase/acetyl-CoA synthase complex subunit alpha	GCF_004137855.1	WP_129596265.1	A	FALSE	unknown		unknown	CODH			NZ_QBKB01000002.1	20378	22783
WP_135390321.1	hypothetical protein	GCF_004745425.1	WP_135390327.1	A	TRUE	unknown		unknown	unknown			NZ_PGGK01000014.1	847	1197
WP_135390322.1	acetyl-CoA decarbonylase/synthase complex subunit gamma	GCF_004745425.1	WP_135390327.1	A	TRUE	C	COG1456@1|root,arCOG01979@2157|Archaea,2XUSG@28890|Euryarchaeota,2N9BD@224756|Methanomicrobia	Part of a complex that catalyzes the reversible cleavage of acetyl-CoA, allowing	One carbon pool	ko00680,ko00720,ko01120,ko01200,map00680,map00720,map01120,map01200	2.1.1.245	NZ_PGGK01000014.1	1361	2770
WP_135390322.1	acetyl-CoA decarbonylase/synthase complex subunit gamma	GCF_004745425.1	WP_135390327.1	A	TRUE	C	COG1456@1|root,arCOG01979@2157|Archaea,2XUSG@28890|Euryarchaeota,2N9BD@224756|Methanomicrobia	Part of a complex that catalyzes the reversible cleavage of acetyl-CoA, allowing	One carbon pool	ko00680,ko00720,ko01120,ko01200,map00680,map00720,map01120,map01200	2.1.1.245	NZ_PGGK01000014.1	1361	2770
WP_135390323.1	CO dehydrogenase/acetyl-CoA synthase subunit delta	GCF_004745425.1	WP_135390327.1	A	TRUE	C	COG2069@1|root,arCOG01980@2157|Archaea,2XTXS@28890|Euryarchaeota,2N93F@224756|Methanomicrobia	Part of a complex that catalyzes the reversible cleavage of acetyl-CoA, allowing	One carbon pool	ko00680,ko00720,ko01120,ko01200,map00680,map00720,map01120,map01200	2.1.1.245	NZ_PGGK01000014.1	2774	4093
WP_135390323.1	CO dehydrogenase/acetyl-CoA synthase subunit delta	GCF_004745425.1	WP_135390327.1	A	TRUE	C	COG2069@1|root,arCOG01980@2157|Archaea,2XTXS@28890|Euryarchaeota,2N93F@224756|Methanomicrobia	Part of a complex that catalyzes the reversible cleavage of acetyl-CoA, allowing	One carbon pool	ko00680,ko00720,ko01120,ko01200,map00680,map00720,map01120,map01200	2.1.1.245	NZ_PGGK01000014.1	2774	4093
WP_135390324.1	AAA family ATPase	GCF_004745425.1	WP_135390327.1	A	TRUE	D	COG3640@1|root,arCOG00587@2157|Archaea,2XT61@28890|Euryarchaeota,2N9QI@224756|Methanomicrobia	AAA domain	CooC			NZ_PGGK01000014.1	4120	4872
WP_135390325.1	CO dehydrogenase/CO-methylating acetyl-CoA synthase complex subunit beta	GCF_004745425.1	WP_135390327.1	A	TRUE	C	COG1614@1|root,arCOG04360@2157|Archaea,2XU0D@28890|Euryarchaeota,2N95I@224756|Methanomicrobia	Part of a complex that catalyzes the reversible cleavage of acetyl-CoA, allowing growth on acetate as sole source of carbon and energy. The alpha-epsilon complex generates CO from CO(2), while the beta subunit (this protein) combines the CO with CoA and a methyl group to form acetyl-CoA. The methyl group, which is incorporated into acetyl-CoA, is transferred to the beta subunit by a corrinoid iro…	One carbon pool	ko00680,ko01120,ko01200,map00680,map01120,map01200		NZ_PGGK01000014.1	4883	6289
WP_135390325.1	CO dehydrogenase/CO-methylating acetyl-CoA synthase complex subunit beta	GCF_004745425.1	WP_135390327.1	A	TRUE	C	COG1614@1|root,arCOG04360@2157|Archaea,2XU0D@28890|Euryarchaeota,2N95I@224756|Methanomicrobia	Part of a complex that catalyzes the reversible cleavage of acetyl-CoA, allowing growth on acetate as sole source of carbon and energy. The alpha-epsilon complex generates CO from CO(2), while the beta subunit (this protein) combines the CO with CoA and a methyl group to form acetyl-CoA. The methyl group, which is incorporated into acetyl-CoA, is transferred to the beta subunit by a corrinoid iro…	One carbon pool	ko00680,ko01120,ko01200,map00680,map01120,map01200		NZ_PGGK01000014.1	4883	6289
WP_135390326.1	CO dehydrogenase/acetyl-CoA synthase complex subunit epsilon	GCF_004745425.1	WP_135390327.1	A	TRUE	C	COG1880@1|root,arCOG04408@2157|Archaea,2XWPE@28890|Euryarchaeota,2NA4Z@224756|Methanomicrobia	Part of a complex that catalyzes the reversible cleavage of acetyl-CoA, allowing growth on acetate as sole source of carbon and energy. The alpha-epsilon subcomponent functions as a carbon monoxide dehydrogenase. The precise role of the epsilon subunit is unclear	One carbon pool	ko00680,ko01120,ko01200,map00680,map01120,map01200		NZ_PGGK01000014.1	6320	6832
WP_135390326.1	CO dehydrogenase/acetyl-CoA synthase complex subunit epsilon	GCF_004745425.1	WP_135390327.1	A	TRUE	C	COG1880@1|root,arCOG04408@2157|Archaea,2XWPE@28890|Euryarchaeota,2NA4Z@224756|Methanomicrobia	Part of a complex that catalyzes the reversible cleavage of acetyl-CoA, allowing growth on acetate as sole source of carbon and energy. The alpha-epsilon subcomponent functions as a carbon monoxide dehydrogenase. The precise role of the epsilon subunit is unclear	One carbon pool	ko00680,ko01120,ko01200,map00680,map01120,map01200		NZ_PGGK01000014.1	6320	6832
WP_135390327.1	CO dehydrogenase/acetyl-CoA synthase complex subunit alpha	GCF_004745425.1	WP_135390327.1	A	FALSE	unknown		unknown	CODH			NZ_PGGK01000014.1	6833	9244
WP_154810751.1	CO dehydrogenase/acetyl-CoA synthase complex subunit alpha	GCF_006546655.1	WP_154810751.1	A	FALSE	unknown		unknown	CODH			NZ_VIAQ01000020.1	52296	54707
WP_154810752.1	CO dehydrogenase/acetyl-CoA synthase complex subunit epsilon	GCF_006546655.1	WP_154810751.1	A	TRUE	C	COG1880@1|root,arCOG04408@2157|Archaea,2XWPE@28890|Euryarchaeota,2NA4Z@224756|Methanomicrobia	Part of a complex that catalyzes the reversible cleavage of acetyl-CoA, allowing growth on acetate as sole source of carbon and energy. The alpha-epsilon subcomponent functions as a carbon monoxide dehydrogenase. The precise role of the epsilon subunit is unclear	One carbon pool	ko00680,ko01120,ko01200,map00680,map01120,map01200		NZ_VIAQ01000020.1	54709	55221
WP_154810752.1	CO dehydrogenase/acetyl-CoA synthase complex subunit epsilon	GCF_006546655.1	WP_154810751.1	A	TRUE	C	COG1880@1|root,arCOG04408@2157|Archaea,2XWPE@28890|Euryarchaeota,2NA4Z@224756|Methanomicrobia	Part of a complex that catalyzes the reversible cleavage of acetyl-CoA, allowing growth on acetate as sole source of carbon and energy. The alpha-epsilon subcomponent functions as a carbon monoxide dehydrogenase. The precise role of the epsilon subunit is unclear	One carbon pool	ko00680,ko01120,ko01200,map00680,map01120,map01200		NZ_VIAQ01000020.1	54709	55221
WP_154810753.1	CO dehydrogenase/CO-methylating acetyl-CoA synthase complex subunit beta	GCF_006546655.1	WP_154810751.1	A	TRUE	C	COG1614@1|root,arCOG04360@2157|Archaea,2XU0D@28890|Euryarchaeota,2N95I@224756|Methanomicrobia	Part of a complex that catalyzes the reversible cleavage of acetyl-CoA, allowing growth on acetate as sole source of carbon and energy. The alpha-epsilon complex generates CO from CO(2), while the beta subunit (this protein) combines the CO with CoA and a methyl group to form acetyl-CoA. The methyl group, which is incorporated into acetyl-CoA, is transferred to the beta subunit by a corrinoid iro…	One carbon pool	ko00680,ko01120,ko01200,map00680,map01120,map01200		NZ_VIAQ01000020.1	55250	56659
WP_154810753.1	CO dehydrogenase/CO-methylating acetyl-CoA synthase complex subunit beta	GCF_006546655.1	WP_154810751.1	A	TRUE	C	COG1614@1|root,arCOG04360@2157|Archaea,2XU0D@28890|Euryarchaeota,2N95I@224756|Methanomicrobia	Part of a complex that catalyzes the reversible cleavage of acetyl-CoA, allowing growth on acetate as sole source of carbon and energy. The alpha-epsilon complex generates CO from CO(2), while the beta subunit (this protein) combines the CO with CoA and a methyl group to form acetyl-CoA. The methyl group, which is incorporated into acetyl-CoA, is transferred to the beta subunit by a corrinoid iro…	One carbon pool	ko00680,ko01120,ko01200,map00680,map01120,map01200		NZ_VIAQ01000020.1	55250	56659
WP_154810754.1	AAA family ATPase	GCF_006546655.1	WP_154810751.1	A	TRUE	D	COG3640@1|root,arCOG00587@2157|Archaea,2XT61@28890|Euryarchaeota,2N9QI@224756|Methanomicrobia	AAA domain	CooC			NZ_VIAQ01000020.1	56672	57424
WP_154810755.1	CO dehydrogenase/acetyl-CoA synthase subunit delta	GCF_006546655.1	WP_154810751.1	A	TRUE	C	COG2069@1|root,arCOG01980@2157|Archaea,2XTXS@28890|Euryarchaeota,2N93F@224756|Methanomicrobia	Part of a complex that catalyzes the reversible cleavage of acetyl-CoA, allowing	One carbon pool	ko00680,ko00720,ko01120,ko01200,map00680,map00720,map01120,map01200	2.1.1.245	NZ_VIAQ01000020.1	57451	58776
WP_154810755.1	CO dehydrogenase/acetyl-CoA synthase subunit delta	GCF_006546655.1	WP_154810751.1	A	TRUE	C	COG2069@1|root,arCOG01980@2157|Archaea,2XTXS@28890|Euryarchaeota,2N93F@224756|Methanomicrobia	Part of a complex that catalyzes the reversible cleavage of acetyl-CoA, allowing	One carbon pool	ko00680,ko00720,ko01120,ko01200,map00680,map00720,map01120,map01200	2.1.1.245	NZ_VIAQ01000020.1	57451	58776
WP_154810756.1	acetyl-CoA decarbonylase/synthase complex subunit gamma	GCF_006546655.1	WP_154810751.1	A	TRUE	C	COG1456@1|root,arCOG01979@2157|Archaea,2XUSG@28890|Euryarchaeota,2N9BD@224756|Methanomicrobia	Part of a complex that catalyzes the reversible cleavage of acetyl-CoA, allowing	One carbon pool	ko00680,ko00720,ko01120,ko01200,map00680,map00720,map01120,map01200	2.1.1.245	NZ_VIAQ01000020.1	58780	60189
WP_154810756.1	acetyl-CoA decarbonylase/synthase complex subunit gamma	GCF_006546655.1	WP_154810751.1	A	TRUE	C	COG1456@1|root,arCOG01979@2157|Archaea,2XUSG@28890|Euryarchaeota,2N9BD@224756|Methanomicrobia	Part of a complex that catalyzes the reversible cleavage of acetyl-CoA, allowing	One carbon pool	ko00680,ko00720,ko01120,ko01200,map00680,map00720,map01120,map01200	2.1.1.245	NZ_VIAQ01000020.1	58780	60189
WP_154810757.1	hypothetical protein	GCF_006546655.1	WP_154810751.1	A	TRUE	unknown		unknown	unknown			NZ_VIAQ01000020.1	60351	60698
WP_176965282.1	CO dehydrogenase/acetyl-CoA synthase complex subunit alpha	GCF_013388255.1	WP_176965282.1	A	FALSE	unknown		unknown	CODH			NZ_CP058215.1	1676376	1678787
WP_176965283.1	CO dehydrogenase/acetyl-CoA synthase complex subunit epsilon	GCF_013388255.1	WP_176965282.1	A	TRUE	C	COG1880@1|root,arCOG04408@2157|Archaea,2XWPE@28890|Euryarchaeota,2NA4Z@224756|Methanomicrobia	Part of a complex that catalyzes the reversible cleavage of acetyl-CoA, allowing growth on acetate as sole source of carbon and energy. The alpha-epsilon subcomponent functions as a carbon monoxide dehydrogenase. The precise role of the epsilon subunit is unclear	One carbon pool	ko00680,ko01120,ko01200,map00680,map01120,map01200		NZ_CP058215.1	1678788	1679300
WP_176965283.1	CO dehydrogenase/acetyl-CoA synthase complex subunit epsilon	GCF_013388255.1	WP_176965282.1	A	TRUE	C	COG1880@1|root,arCOG04408@2157|Archaea,2XWPE@28890|Euryarchaeota,2NA4Z@224756|Methanomicrobia	Part of a complex that catalyzes the reversible cleavage of acetyl-CoA, allowing growth on acetate as sole source of carbon and energy. The alpha-epsilon subcomponent functions as a carbon monoxide dehydrogenase. The precise role of the epsilon subunit is unclear	One carbon pool	ko00680,ko01120,ko01200,map00680,map01120,map01200		NZ_CP058215.1	1678788	1679300
WP_176965284.1	CO dehydrogenase/CO-methylating acetyl-CoA synthase complex subunit beta	GCF_013388255.1	WP_176965282.1	A	TRUE	C	COG1614@1|root,arCOG04360@2157|Archaea,2XU0D@28890|Euryarchaeota,2N95I@224756|Methanomicrobia	Part of a complex that catalyzes the reversible cleavage of acetyl-CoA, allowing growth on acetate as sole source of carbon and energy. The alpha-epsilon complex generates CO from CO(2), while the beta subunit (this protein) combines the CO with CoA and a methyl group to form acetyl-CoA. The methyl group, which is incorporated into acetyl-CoA, is transferred to the beta subunit by a corrinoid iro…	One carbon pool	ko00680,ko01120,ko01200,map00680,map01120,map01200		NZ_CP058215.1	1679329	1680744
WP_176965284.1	CO dehydrogenase/CO-methylating acetyl-CoA synthase complex subunit beta	GCF_013388255.1	WP_176965282.1	A	TRUE	C	COG1614@1|root,arCOG04360@2157|Archaea,2XU0D@28890|Euryarchaeota,2N95I@224756|Methanomicrobia	Part of a complex that catalyzes the reversible cleavage of acetyl-CoA, allowing growth on acetate as sole source of carbon and energy. The alpha-epsilon complex generates CO from CO(2), while the beta subunit (this protein) combines the CO with CoA and a methyl group to form acetyl-CoA. The methyl group, which is incorporated into acetyl-CoA, is transferred to the beta subunit by a corrinoid iro…	One carbon pool	ko00680,ko01120,ko01200,map00680,map01120,map01200		NZ_CP058215.1	1679329	1680744
WP_176965285.1	carbon monoxide dehydrogenase accessory protein CooC	GCF_013388255.1	WP_176965282.1	A	TRUE	D	COG3640@1|root,arCOG00587@2157|Archaea,2XT61@28890|Euryarchaeota,2N9QI@224756|Methanomicrobia	AAA domain	CooC			NZ_CP058215.1	1680757	1681509
WP_176965286.1	CO dehydrogenase/acetyl-CoA synthase subunit delta	GCF_013388255.1	WP_176965282.1	A	TRUE	C	COG2069@1|root,arCOG01980@2157|Archaea,2XTXS@28890|Euryarchaeota,2N93F@224756|Methanomicrobia	Part of a complex that catalyzes the reversible cleavage of acetyl-CoA, allowing	One carbon pool	ko00680,ko00720,ko01120,ko01200,map00680,map00720,map01120,map01200	2.1.1.245	NZ_CP058215.1	1681533	1682852
WP_176965286.1	CO dehydrogenase/acetyl-CoA synthase subunit delta	GCF_013388255.1	WP_176965282.1	A	TRUE	C	COG2069@1|root,arCOG01980@2157|Archaea,2XTXS@28890|Euryarchaeota,2N93F@224756|Methanomicrobia	Part of a complex that catalyzes the reversible cleavage of acetyl-CoA, allowing	One carbon pool	ko00680,ko00720,ko01120,ko01200,map00680,map00720,map01120,map01200	2.1.1.245	NZ_CP058215.1	1681533	1682852
WP_176965287.1	acetyl-CoA decarbonylase/synthase complex subunit gamma	GCF_013388255.1	WP_176965282.1	A	TRUE	C	COG1456@1|root,arCOG01979@2157|Archaea,2XUSG@28890|Euryarchaeota,2N9BD@224756|Methanomicrobia	Part of a complex that catalyzes the reversible cleavage of acetyl-CoA, allowing	One carbon pool	ko00680,ko00720,ko01120,ko01200,map00680,map00720,map01120,map01200	2.1.1.245	NZ_CP058215.1	1682856	1684265
WP_176965287.1	acetyl-CoA decarbonylase/synthase complex subunit gamma	GCF_013388255.1	WP_176965282.1	A	TRUE	C	COG1456@1|root,arCOG01979@2157|Archaea,2XUSG@28890|Euryarchaeota,2N9BD@224756|Methanomicrobia	Part of a complex that catalyzes the reversible cleavage of acetyl-CoA, allowing	One carbon pool	ko00680,ko00720,ko01120,ko01200,map00680,map00720,map01120,map01200	2.1.1.245	NZ_CP058215.1	1682856	1684265
WP_176965288.1	hypothetical protein	GCF_013388255.1	WP_176965282.1	A	TRUE	unknown		unknown	unknown			NZ_CP058215.1	1684424	1684774
WP_226891049.1	4Fe-4S dicluster domain-containing protein	GCF_014889545.1	WP_192961529.1	A	TRUE	C	COG1142@1|root,arCOG01502@2157|Archaea,2XXN1@28890|Euryarchaeota	PFAM 4Fe-4S ferredoxin, iron-sulfur binding domain protein	FeS			NZ_QKOF01000005.1	30311	30772
WP_192961524.1	acetyl-CoA decarbonylase/synthase complex subunit gamma	GCF_014889545.1	WP_192961529.1	A	TRUE	H	COG1456@1|root,arCOG01979@2157|Archaea,2XUSG@28890|Euryarchaeota	Part of a complex that catalyzes the reversible cleavage of acetyl-CoA, allowing autotrophic growth from CO(2)	One carbon pool	ko00680,ko00720,ko01120,ko01200,map00680,map00720,map01120,map01200	2.1.1.245	NZ_QKOF01000005.1	30790	32166
WP_192961524.1	acetyl-CoA decarbonylase/synthase complex subunit gamma	GCF_014889545.1	WP_192961529.1	A	TRUE	H	COG1456@1|root,arCOG01979@2157|Archaea,2XUSG@28890|Euryarchaeota	Part of a complex that catalyzes the reversible cleavage of acetyl-CoA, allowing autotrophic growth from CO(2)	One carbon pool	ko00680,ko00720,ko01120,ko01200,map00680,map00720,map01120,map01200	2.1.1.245	NZ_QKOF01000005.1	30790	32166
WP_192961525.1	CO dehydrogenase/acetyl-CoA synthase subunit delta	GCF_014889545.1	WP_192961529.1	A	TRUE	C	COG2069@1|root,arCOG01980@2157|Archaea,2XTXS@28890|Euryarchaeota	Part of a complex that catalyzes the reversible cleavage of acetyl-CoA, allowing autotrophic growth from CO(2). Probably maintains the overall quaternary structure of the ACDS complex	One carbon pool	ko00680,ko00720,ko01120,ko01200,map00680,map00720,map01120,map01200	2.1.1.245	NZ_QKOF01000005.1	32169	33332
WP_192961525.1	CO dehydrogenase/acetyl-CoA synthase subunit delta	GCF_014889545.1	WP_192961529.1	A	TRUE	C	COG2069@1|root,arCOG01980@2157|Archaea,2XTXS@28890|Euryarchaeota	Part of a complex that catalyzes the reversible cleavage of acetyl-CoA, allowing autotrophic growth from CO(2). Probably maintains the overall quaternary structure of the ACDS complex	One carbon pool	ko00680,ko00720,ko01120,ko01200,map00680,map00720,map01120,map01200	2.1.1.245	NZ_QKOF01000005.1	32169	33332
WP_192961526.1	AAA family ATPase	GCF_014889545.1	WP_192961529.1	A	TRUE	D	COG3640@1|root,arCOG00587@2157|Archaea,2XT61@28890|Euryarchaeota	PFAM Cobyrinic acid a,c-diamide synthase	CooC			NZ_QKOF01000005.1	33343	34089
WP_192961527.1	CO dehydrogenase/CO-methylating acetyl-CoA synthase complex subunit beta	GCF_014889545.1	WP_192961529.1	A	TRUE	C	COG1614@1|root,arCOG04360@2157|Archaea,2XU0D@28890|Euryarchaeota	Part of a complex that catalyzes the reversible cleavage of acetyl-CoA, allowing autotrophic growth from CO(2). The alpha- epsilon complex generates CO from CO(2), while the beta subunit (this protein) combines the CO with CoA and a methyl group to form acetyl-CoA. The methyl group, which is incorporated into acetyl- CoA, is transferred to the beta subunit by a corrinoid iron-sulfur protein (the …	One carbon pool	ko00680,ko01120,ko01200,map00680,map01120,map01200	1.2.7.4	NZ_QKOF01000005.1	34108	35490
WP_192961527.1	CO dehydrogenase/CO-methylating acetyl-CoA synthase complex subunit beta	GCF_014889545.1	WP_192961529.1	A	TRUE	C	COG1614@1|root,arCOG04360@2157|Archaea,2XU0D@28890|Euryarchaeota	Part of a complex that catalyzes the reversible cleavage of acetyl-CoA, allowing autotrophic growth from CO(2). The alpha- epsilon complex generates CO from CO(2), while the beta subunit (this protein) combines the CO with CoA and a methyl group to form acetyl-CoA. The methyl group, which is incorporated into acetyl- CoA, is transferred to the beta subunit by a corrinoid iron-sulfur protein (the …	One carbon pool	ko00680,ko01120,ko01200,map00680,map01120,map01200	1.2.7.4	NZ_QKOF01000005.1	34108	35490
WP_192961528.1	CO dehydrogenase/acetyl-CoA synthase complex subunit epsilon	GCF_014889545.1	WP_192961529.1	A	TRUE	C	COG1880@1|root,arCOG04408@2157|Archaea,2XWPE@28890|Euryarchaeota	Part of a complex that catalyzes the reversible cleavage of acetyl-CoA, allowing autotrophic growth from CO(2). The alpha- epsilon subcomponent functions as a carbon monoxide dehydrogenase. The precise role of the epsilon subunit is unclear	One carbon pool	ko00680,ko01120,ko01200,map00680,map01120,map01200		NZ_QKOF01000005.1	35512	36033
WP_192961528.1	CO dehydrogenase/acetyl-CoA synthase complex subunit epsilon	GCF_014889545.1	WP_192961529.1	A	TRUE	C	COG1880@1|root,arCOG04408@2157|Archaea,2XWPE@28890|Euryarchaeota	Part of a complex that catalyzes the reversible cleavage of acetyl-CoA, allowing autotrophic growth from CO(2). The alpha- epsilon subcomponent functions as a carbon monoxide dehydrogenase. The precise role of the epsilon subunit is unclear	One carbon pool	ko00680,ko01120,ko01200,map00680,map01120,map01200		NZ_QKOF01000005.1	35512	36033
WP_192961529.1	CO dehydrogenase/acetyl-CoA synthase complex subunit alpha	GCF_014889545.1	WP_192961529.1	A	FALSE	unknown		unknown	CODH			NZ_QKOF01000005.1	36030	38372
WP_202319240.1	CO dehydrogenase/acetyl-CoA synthase complex subunit epsilon	GCF_016757965.1	WP_202319241.1	A	TRUE	C	COG1880@1|root,arCOG04408@2157|Archaea,2XWPE@28890|Euryarchaeota	Part of a complex that catalyzes the reversible cleavage of acetyl-CoA, allowing autotrophic growth from CO(2). The alpha- epsilon subcomponent functions as a carbon monoxide dehydrogenase. The precise role of the epsilon subunit is unclear	One carbon pool	ko00680,ko01120,ko01200,map00680,map01120,map01200		NZ_JAEKIW010000005.1	40458	40985
WP_202319240.1	CO dehydrogenase/acetyl-CoA synthase complex subunit epsilon	GCF_016757965.1	WP_202319241.1	A	TRUE	C	COG1880@1|root,arCOG04408@2157|Archaea,2XWPE@28890|Euryarchaeota	Part of a complex that catalyzes the reversible cleavage of acetyl-CoA, allowing autotrophic growth from CO(2). The alpha- epsilon subcomponent functions as a carbon monoxide dehydrogenase. The precise role of the epsilon subunit is unclear	One carbon pool	ko00680,ko01120,ko01200,map00680,map01120,map01200		NZ_JAEKIW010000005.1	40458	40985
WP_202319241.1	CO dehydrogenase/acetyl-CoA synthase complex subunit alpha	GCF_016757965.1	WP_202319241.1	A	FALSE	unknown		unknown	CODH			NZ_JAEKIW010000005.1	40996	43392
WP_202319685.1	CO dehydrogenase/acetyl-CoA synthase complex subunit alpha	GCF_016757965.1	WP_202319685.1	A	FALSE	unknown		unknown	CODH			NZ_JAEKIW010000007.1	123086	125482
WP_230972347.1	CO dehydrogenase/acetyl-CoA synthase complex subunit epsilon	GCF_016757965.1	WP_202319685.1	A	TRUE	C	COG1880@1|root,arCOG04408@2157|Archaea,2XWPE@28890|Euryarchaeota,245XY@183980|Archaeoglobi	Part of a complex that catalyzes the reversible cleavage of acetyl-CoA, allowing autotrophic growth from CO(2). The alpha- epsilon subcomponent functions as a carbon monoxide dehydrogenase. The precise role of the epsilon subunit is unclear	One carbon pool	ko00680,ko01120,ko01200,map00680,map01120,map01200		NZ_JAEKIW010000007.1	125488	126033
WP_230972347.1	CO dehydrogenase/acetyl-CoA synthase complex subunit epsilon	GCF_016757965.1	WP_202319685.1	A	TRUE	C	COG1880@1|root,arCOG04408@2157|Archaea,2XWPE@28890|Euryarchaeota,245XY@183980|Archaeoglobi	Part of a complex that catalyzes the reversible cleavage of acetyl-CoA, allowing autotrophic growth from CO(2). The alpha- epsilon subcomponent functions as a carbon monoxide dehydrogenase. The precise role of the epsilon subunit is unclear	One carbon pool	ko00680,ko01120,ko01200,map00680,map01120,map01200		NZ_JAEKIW010000007.1	125488	126033
WP_202319687.1	hypothetical protein	GCF_016757965.1	WP_202319685.1	A	TRUE	unknown	arCOG10392@1|root,arCOG10392@2157|Archaea	unknown	unknown			NZ_JAEKIW010000007.1	126056	126280
WP_209617741.1	CO dehydrogenase/acetyl-CoA synthase complex subunit alpha	GCF_017873415.1	WP_209617741.1	A	FALSE	unknown		unknown	CODH			NZ_JAGGKD010000004.1	67635	70046
WP_209617743.1	CO dehydrogenase/acetyl-CoA synthase complex subunit epsilon	GCF_017873415.1	WP_209617741.1	A	TRUE	C	COG1880@1|root,arCOG04408@2157|Archaea,2XWPE@28890|Euryarchaeota,2NA4Z@224756|Methanomicrobia	Part of a complex that catalyzes the reversible cleavage of acetyl-CoA, allowing growth on acetate as sole source of carbon and energy. The alpha-epsilon subcomponent functions as a carbon monoxide dehydrogenase. The precise role of the epsilon subunit is unclear	One carbon pool	ko00680,ko01120,ko01200,map00680,map01120,map01200		NZ_JAGGKD010000004.1	70047	70559
WP_209617743.1	CO dehydrogenase/acetyl-CoA synthase complex subunit epsilon	GCF_017873415.1	WP_209617741.1	A	TRUE	C	COG1880@1|root,arCOG04408@2157|Archaea,2XWPE@28890|Euryarchaeota,2NA4Z@224756|Methanomicrobia	Part of a complex that catalyzes the reversible cleavage of acetyl-CoA, allowing growth on acetate as sole source of carbon and energy. The alpha-epsilon subcomponent functions as a carbon monoxide dehydrogenase. The precise role of the epsilon subunit is unclear	One carbon pool	ko00680,ko01120,ko01200,map00680,map01120,map01200		NZ_JAGGKD010000004.1	70047	70559
WP_209617747.1	CO dehydrogenase/CO-methylating acetyl-CoA synthase complex subunit beta	GCF_017873415.1	WP_209617741.1	A	TRUE	C	COG1614@1|root,arCOG04360@2157|Archaea,2XU0D@28890|Euryarchaeota,2N95I@224756|Methanomicrobia	Part of a complex that catalyzes the reversible cleavage of acetyl-CoA, allowing growth on acetate as sole source of carbon and energy. The alpha-epsilon complex generates CO from CO(2), while the beta subunit (this protein) combines the CO with CoA and a methyl group to form acetyl-CoA. The methyl group, which is incorporated into acetyl-CoA, is transferred to the beta subunit by a corrinoid iro…	One carbon pool	ko00680,ko01120,ko01200,map00680,map01120,map01200		NZ_JAGGKD010000004.1	70594	72006
WP_209617747.1	CO dehydrogenase/CO-methylating acetyl-CoA synthase complex subunit beta	GCF_017873415.1	WP_209617741.1	A	TRUE	C	COG1614@1|root,arCOG04360@2157|Archaea,2XU0D@28890|Euryarchaeota,2N95I@224756|Methanomicrobia	Part of a complex that catalyzes the reversible cleavage of acetyl-CoA, allowing growth on acetate as sole source of carbon and energy. The alpha-epsilon complex generates CO from CO(2), while the beta subunit (this protein) combines the CO with CoA and a methyl group to form acetyl-CoA. The methyl group, which is incorporated into acetyl-CoA, is transferred to the beta subunit by a corrinoid iro…	One carbon pool	ko00680,ko01120,ko01200,map00680,map01120,map01200		NZ_JAGGKD010000004.1	70594	72006
WP_209617750.1	carbon monoxide dehydrogenase accessory protein CooC	GCF_017873415.1	WP_209617741.1	A	TRUE	D	COG3640@1|root,arCOG00587@2157|Archaea,2XT61@28890|Euryarchaeota,2N9QI@224756|Methanomicrobia	AAA domain	CooC			NZ_JAGGKD010000004.1	72019	72771
WP_209617753.1	CO dehydrogenase/acetyl-CoA synthase subunit delta	GCF_017873415.1	WP_209617741.1	A	TRUE	C	COG2069@1|root,arCOG01980@2157|Archaea,2XTXS@28890|Euryarchaeota,2N93F@224756|Methanomicrobia	Part of a complex that catalyzes the reversible cleavage of acetyl-CoA, allowing	One carbon pool	ko00680,ko00720,ko01120,ko01200,map00680,map00720,map01120,map01200	2.1.1.245	NZ_JAGGKD010000004.1	72798	74123
WP_209617753.1	CO dehydrogenase/acetyl-CoA synthase subunit delta	GCF_017873415.1	WP_209617741.1	A	TRUE	C	COG2069@1|root,arCOG01980@2157|Archaea,2XTXS@28890|Euryarchaeota,2N93F@224756|Methanomicrobia	Part of a complex that catalyzes the reversible cleavage of acetyl-CoA, allowing	One carbon pool	ko00680,ko00720,ko01120,ko01200,map00680,map00720,map01120,map01200	2.1.1.245	NZ_JAGGKD010000004.1	72798	74123
WP_209617757.1	acetyl-CoA decarbonylase/synthase complex subunit gamma	GCF_017873415.1	WP_209617741.1	A	TRUE	C	COG1456@1|root,arCOG01979@2157|Archaea,2XUSG@28890|Euryarchaeota,2N9BD@224756|Methanomicrobia	Part of a complex that catalyzes the reversible cleavage of acetyl-CoA, allowing	One carbon pool	ko00680,ko00720,ko01120,ko01200,map00680,map00720,map01120,map01200	2.1.1.245	NZ_JAGGKD010000004.1	74127	75536
WP_209617757.1	acetyl-CoA decarbonylase/synthase complex subunit gamma	GCF_017873415.1	WP_209617741.1	A	TRUE	C	COG1456@1|root,arCOG01979@2157|Archaea,2XUSG@28890|Euryarchaeota,2N9BD@224756|Methanomicrobia	Part of a complex that catalyzes the reversible cleavage of acetyl-CoA, allowing	One carbon pool	ko00680,ko00720,ko01120,ko01200,map00680,map00720,map01120,map01200	2.1.1.245	NZ_JAGGKD010000004.1	74127	75536
WP_209617760.1	hypothetical protein	GCF_017873415.1	WP_209617741.1	A	TRUE	unknown		unknown	unknown			NZ_JAGGKD010000004.1	75685	76032
WP_209625724.1	CpaF family protein	GCF_017873625.1	WP_342451636.1	A	TRUE	U	COG4962@1|root,arCOG01819@2157|Archaea,2Y8F5@28890|Euryarchaeota,23NT6@183925|Methanobacteria	secretion system protein	unknown			NZ_JAGGKL010000005.1	174866	176491
WP_209625725.1	type II secretion system F family protein	GCF_017873625.1	WP_342451636.1	A	TRUE	N	COG2064@1|root,arCOG01812@2157|Archaea,2Y780@28890|Euryarchaeota,23P2D@183925|Methanobacteria	type II secretion	unknown			NZ_JAGGKL010000005.1	176654	177778
WP_342451636.1	CO dehydrogenase/acetyl-CoA synthase complex subunit alpha	GCF_017873625.1	WP_342451636.1	A	FALSE	unknown		unknown	CODH			NZ_JAGGKL010000005.1	178047	180398
WP_209625727.1	CO dehydrogenase/acetyl-CoA synthase complex subunit epsilon	GCF_017873625.1	WP_342451636.1	A	TRUE	C	COG1880@1|root,arCOG04408@2157|Archaea,2XWPE@28890|Euryarchaeota	Part of a complex that catalyzes the reversible cleavage of acetyl-CoA, allowing autotrophic growth from CO(2). The alpha- epsilon subcomponent functions as a carbon monoxide dehydrogenase. The precise role of the epsilon subunit is unclear	One carbon pool	ko00680,ko01120,ko01200,map00680,map01120,map01200		NZ_JAGGKL010000005.1	180399	180920
WP_209625727.1	CO dehydrogenase/acetyl-CoA synthase complex subunit epsilon	GCF_017873625.1	WP_342451636.1	A	TRUE	C	COG1880@1|root,arCOG04408@2157|Archaea,2XWPE@28890|Euryarchaeota	Part of a complex that catalyzes the reversible cleavage of acetyl-CoA, allowing autotrophic growth from CO(2). The alpha- epsilon subcomponent functions as a carbon monoxide dehydrogenase. The precise role of the epsilon subunit is unclear	One carbon pool	ko00680,ko01120,ko01200,map00680,map01120,map01200		NZ_JAGGKL010000005.1	180399	180920
WP_209625728.1	CO dehydrogenase/CO-methylating acetyl-CoA synthase complex subunit beta	GCF_017873625.1	WP_342451636.1	A	TRUE	C	COG1614@1|root,arCOG04360@2157|Archaea,2XU0D@28890|Euryarchaeota	Part of a complex that catalyzes the reversible cleavage of acetyl-CoA, allowing autotrophic growth from CO(2). The alpha- epsilon complex generates CO from CO(2), while the beta subunit (this protein) combines the CO with CoA and a methyl group to form acetyl-CoA. The methyl group, which is incorporated into acetyl- CoA, is transferred to the beta subunit by a corrinoid iron-sulfur protein (the …	One carbon pool	ko00680,ko01120,ko01200,map00680,map01120,map01200	1.2.7.4	NZ_JAGGKL010000005.1	181007	182413
WP_209625728.1	CO dehydrogenase/CO-methylating acetyl-CoA synthase complex subunit beta	GCF_017873625.1	WP_342451636.1	A	TRUE	C	COG1614@1|root,arCOG04360@2157|Archaea,2XU0D@28890|Euryarchaeota	Part of a complex that catalyzes the reversible cleavage of acetyl-CoA, allowing autotrophic growth from CO(2). The alpha- epsilon complex generates CO from CO(2), while the beta subunit (this protein) combines the CO with CoA and a methyl group to form acetyl-CoA. The methyl group, which is incorporated into acetyl- CoA, is transferred to the beta subunit by a corrinoid iron-sulfur protein (the …	One carbon pool	ko00680,ko01120,ko01200,map00680,map01120,map01200	1.2.7.4	NZ_JAGGKL010000005.1	181007	182413
WP_209625729.1	AAA family ATPase	GCF_017873625.1	WP_342451636.1	A	TRUE	D	COG3640@1|root,arCOG00587@2157|Archaea,2XT61@28890|Euryarchaeota	PFAM Cobyrinic acid a,c-diamide synthase	CooC			NZ_JAGGKL010000005.1	182509	183261
WP_209625730.1	CO dehydrogenase/acetyl-CoA synthase subunit delta	GCF_017873625.1	WP_342451636.1	A	TRUE	C	COG2069@1|root,arCOG01980@2157|Archaea,2XTXS@28890|Euryarchaeota	Part of a complex that catalyzes the reversible cleavage of acetyl-CoA, allowing autotrophic growth from CO(2). Probably maintains the overall quaternary structure of the ACDS complex	One carbon pool	ko00680,ko00720,ko01120,ko01200,map00680,map00720,map01120,map01200	2.1.1.245	NZ_JAGGKL010000005.1	183278	184441
WP_209625730.1	CO dehydrogenase/acetyl-CoA synthase subunit delta	GCF_017873625.1	WP_342451636.1	A	TRUE	C	COG2069@1|root,arCOG01980@2157|Archaea,2XTXS@28890|Euryarchaeota	Part of a complex that catalyzes the reversible cleavage of acetyl-CoA, allowing autotrophic growth from CO(2). Probably maintains the overall quaternary structure of the ACDS complex	One carbon pool	ko00680,ko00720,ko01120,ko01200,map00680,map00720,map01120,map01200	2.1.1.245	NZ_JAGGKL010000005.1	183278	184441
WP_209625731.1	acetyl-CoA decarbonylase/synthase complex subunit gamma	GCF_017873625.1	WP_342451636.1	A	TRUE	H	COG1456@1|root,arCOG01979@2157|Archaea,2XUSG@28890|Euryarchaeota	Part of a complex that catalyzes the reversible cleavage of acetyl-CoA, allowing autotrophic growth from CO(2)	One carbon pool	ko00680,ko00720,ko01120,ko01200,map00680,map00720,map01120,map01200	2.1.1.245	NZ_JAGGKL010000005.1	184454	185845
WP_209625731.1	acetyl-CoA decarbonylase/synthase complex subunit gamma	GCF_017873625.1	WP_342451636.1	A	TRUE	H	COG1456@1|root,arCOG01979@2157|Archaea,2XUSG@28890|Euryarchaeota	Part of a complex that catalyzes the reversible cleavage of acetyl-CoA, allowing autotrophic growth from CO(2)	One carbon pool	ko00680,ko00720,ko01120,ko01200,map00680,map00720,map01120,map01200	2.1.1.245	NZ_JAGGKL010000005.1	184454	185845
WP_209625732.1	4Fe-4S dicluster domain-containing protein	GCF_017873625.1	WP_342451636.1	A	TRUE	C	COG1142@1|root,arCOG01502@2157|Archaea,2XXN1@28890|Euryarchaeota	PFAM 4Fe-4S ferredoxin, iron-sulfur binding domain protein	FeS			NZ_JAGGKL010000005.1	185892	186362
WP_209679759.1	CO dehydrogenase/acetyl-CoA synthase complex subunit alpha	GCF_017874375.1	WP_209679759.1	A	FALSE	unknown		unknown	CODH			NZ_JAGGLK010000001.1	685953	688361
WP_209679762.1	CO dehydrogenase/acetyl-CoA synthase complex subunit epsilon	GCF_017874375.1	WP_209679759.1	A	TRUE	C	COG1880@1|root,arCOG04408@2157|Archaea,2XWPE@28890|Euryarchaeota,2NA4Z@224756|Methanomicrobia	Part of a complex that catalyzes the reversible cleavage of acetyl-CoA, allowing growth on acetate as sole source of carbon and energy. The alpha-epsilon subcomponent functions as a carbon monoxide dehydrogenase. The precise role of the epsilon subunit is unclear	One carbon pool	ko00680,ko01120,ko01200,map00680,map01120,map01200		NZ_JAGGLK010000001.1	688361	688873
WP_209679762.1	CO dehydrogenase/acetyl-CoA synthase complex subunit epsilon	GCF_017874375.1	WP_209679759.1	A	TRUE	C	COG1880@1|root,arCOG04408@2157|Archaea,2XWPE@28890|Euryarchaeota,2NA4Z@224756|Methanomicrobia	Part of a complex that catalyzes the reversible cleavage of acetyl-CoA, allowing growth on acetate as sole source of carbon and energy. The alpha-epsilon subcomponent functions as a carbon monoxide dehydrogenase. The precise role of the epsilon subunit is unclear	One carbon pool	ko00680,ko01120,ko01200,map00680,map01120,map01200		NZ_JAGGLK010000001.1	688361	688873
WP_209679779.1	CO dehydrogenase/CO-methylating acetyl-CoA synthase complex subunit beta	GCF_017874375.1	WP_209679759.1	A	TRUE	C	COG1614@1|root,arCOG04360@2157|Archaea,2XU0D@28890|Euryarchaeota,2N95I@224756|Methanomicrobia	Part of a complex that catalyzes the reversible cleavage of acetyl-CoA, allowing growth on acetate as sole source of carbon and energy. The alpha-epsilon complex generates CO from CO(2), while the beta subunit (this protein) combines the CO with CoA and a methyl group to form acetyl-CoA. The methyl group, which is incorporated into acetyl-CoA, is transferred to the beta subunit by a corrinoid iro…	One carbon pool	ko00680,ko01120,ko01200,map00680,map01120,map01200		NZ_JAGGLK010000001.1	688898	690304
WP_209679779.1	CO dehydrogenase/CO-methylating acetyl-CoA synthase complex subunit beta	GCF_017874375.1	WP_209679759.1	A	TRUE	C	COG1614@1|root,arCOG04360@2157|Archaea,2XU0D@28890|Euryarchaeota,2N95I@224756|Methanomicrobia	Part of a complex that catalyzes the reversible cleavage of acetyl-CoA, allowing growth on acetate as sole source of carbon and energy. The alpha-epsilon complex generates CO from CO(2), while the beta subunit (this protein) combines the CO with CoA and a methyl group to form acetyl-CoA. The methyl group, which is incorporated into acetyl-CoA, is transferred to the beta subunit by a corrinoid iro…	One carbon pool	ko00680,ko01120,ko01200,map00680,map01120,map01200		NZ_JAGGLK010000001.1	688898	690304
WP_209679782.1	AAA family ATPase	GCF_017874375.1	WP_209679759.1	A	TRUE	D	COG3640@1|root,arCOG00587@2157|Archaea,2XT61@28890|Euryarchaeota,2N9QI@224756|Methanomicrobia	AAA domain	CooC			NZ_JAGGLK010000001.1	690319	691071
WP_209679785.1	CO dehydrogenase/acetyl-CoA synthase subunit delta	GCF_017874375.1	WP_209679759.1	A	TRUE	C	COG2069@1|root,arCOG01980@2157|Archaea,2XTXS@28890|Euryarchaeota,2N93F@224756|Methanomicrobia	Part of a complex that catalyzes the reversible cleavage of acetyl-CoA, allowing	One carbon pool	ko00680,ko00720,ko01120,ko01200,map00680,map00720,map01120,map01200	2.1.1.245	NZ_JAGGLK010000001.1	691102	692421
WP_209679785.1	CO dehydrogenase/acetyl-CoA synthase subunit delta	GCF_017874375.1	WP_209679759.1	A	TRUE	C	COG2069@1|root,arCOG01980@2157|Archaea,2XTXS@28890|Euryarchaeota,2N93F@224756|Methanomicrobia	Part of a complex that catalyzes the reversible cleavage of acetyl-CoA, allowing	One carbon pool	ko00680,ko00720,ko01120,ko01200,map00680,map00720,map01120,map01200	2.1.1.245	NZ_JAGGLK010000001.1	691102	692421
WP_209679788.1	acetyl-CoA decarbonylase/synthase complex subunit gamma	GCF_017874375.1	WP_209679759.1	A	TRUE	C	COG1456@1|root,arCOG01979@2157|Archaea,2XUSG@28890|Euryarchaeota,2N9BD@224756|Methanomicrobia	Part of a complex that catalyzes the reversible cleavage of acetyl-CoA, allowing	One carbon pool	ko00680,ko00720,ko01120,ko01200,map00680,map00720,map01120,map01200	2.1.1.245	NZ_JAGGLK010000001.1	692425	693837
WP_209679788.1	acetyl-CoA decarbonylase/synthase complex subunit gamma	GCF_017874375.1	WP_209679759.1	A	TRUE	C	COG1456@1|root,arCOG01979@2157|Archaea,2XUSG@28890|Euryarchaeota,2N9BD@224756|Methanomicrobia	Part of a complex that catalyzes the reversible cleavage of acetyl-CoA, allowing	One carbon pool	ko00680,ko00720,ko01120,ko01200,map00680,map00720,map01120,map01200	2.1.1.245	NZ_JAGGLK010000001.1	692425	693837
WP_209679790.1	DUF362 domain-containing protein	GCF_017874375.1	WP_209679759.1	A	TRUE	C	COG2768@1|root,arCOG02448@2157|Archaea,2XW30@28890|Euryarchaeota,2N9AE@224756|Methanomicrobia	PFAM 4Fe-4S ferredoxin, iron-sulfur binding domain protein	FeS			NZ_JAGGLK010000001.1	693926	695035
WP_211532392.1	4Fe-4S dicluster domain-containing protein	GCF_018141185.1	WP_394357442.1	A	TRUE	C	COG1142@1|root,arCOG01502@2157|Archaea,2XXPM@28890|Euryarchaeota,23QVU@183939|Methanococci	PFAM 4Fe-4S ferredoxin, iron-sulfur binding domain protein	FeS			NZ_CP058560.1	1322610	1323011
WP_394357442.1	4Fe-4S dicluster domain-containing protein	GCF_018141185.1	WP_394357442.1	A	FALSE	unknown		unknown	CODH			NZ_CP058560.1	1323100	1325535
WP_394357443.1	CO dehydrogenase/acetyl-CoA synthase complex subunit alpha	GCF_018141185.1	WP_394357443.1	A	FALSE	unknown		unknown	CODH			NZ_CP058560.1	1606536	1608938
WP_211532645.1	CO dehydrogenase/acetyl-CoA synthase complex subunit epsilon	GCF_018141185.1	WP_394357443.1	A	TRUE	C	COG1880@1|root,arCOG04408@2157|Archaea,2XWPE@28890|Euryarchaeota	Part of a complex that catalyzes the reversible cleavage of acetyl-CoA, allowing autotrophic growth from CO(2). The alpha- epsilon subcomponent functions as a carbon monoxide dehydrogenase. The precise role of the epsilon subunit is unclear	One carbon pool	ko00680,ko01120,ko01200,map00680,map01120,map01200		NZ_CP058560.1	1608958	1609470
WP_211532645.1	CO dehydrogenase/acetyl-CoA synthase complex subunit epsilon	GCF_018141185.1	WP_394357443.1	A	TRUE	C	COG1880@1|root,arCOG04408@2157|Archaea,2XWPE@28890|Euryarchaeota	Part of a complex that catalyzes the reversible cleavage of acetyl-CoA, allowing autotrophic growth from CO(2). The alpha- epsilon subcomponent functions as a carbon monoxide dehydrogenase. The precise role of the epsilon subunit is unclear	One carbon pool	ko00680,ko01120,ko01200,map00680,map01120,map01200		NZ_CP058560.1	1608958	1609470
[truncated: 15,861 more rows]

## Sheet: Neighbour_Proteins
Protein_ID	Product	Assembly	Phylogenetic_Clade	Seed_Protein	E_value	COG_Category	COG_Description	Manual_Description	KEGG_Pathway	PFAM_Domains
ABD40442.1	acetyl-CoA decarbonylase/synthase epsilon subunit	GCA_000013445.1	A	ABD40443.1	2.99e-134	C	Part of a complex that catalyzes the reversible cleavage of acetyl-CoA, allowing autotrophic growth from CO(2). The alpha- epsilon subcomponent functions as a carbon monoxide dehydrogenase. The precise role of the epsilon subunit is unclear	One carbon pool	ko00680,ko01120,ko01200,map00680,map01120,map01200	CO_dh
[truncated: 13,990 more rows]

## Sheet: CODH
Protein_ID	Product	Assembly	Phylogenetic_Clade
[truncated: 1,352 more rows]

## Sheet: HCP
Protein_ID	Product	Assembly	Phylogenetic_Clade
[truncated: 1,476 more rows]

[truncated: 4 more sheets: CooJ, CODH_Hits, HCP_Hits, Co_Occurence]
